# Supplementary material for: Ancestral reconstruction of duplicated signaling proteins reveals the evolution of signaling specificity
Source: eLife journal article supplement (doi:10.7554/elife.77346), 2022-06-10
Supplement: supp [file elife-77346-supp-v1.zip]

Archive with 27 entries (27 files):
- elife_poa_e77346_Figure_1_figure_supplement_1.pdf
- elife_poa_e77346_Figure_1_figure_supplement_2.pdf
- elife_poa_e77346_Figure_2_figure_supplement_1.pdf
- elife_poa_e77346_Figure_2_figure_supplement_2.pdf
- elife_poa_e77346_Figure_2_figure_supplement_3.pdf
- elife_poa_e77346_Figure_2_figure_supplement_4.pdf
- elife_poa_e77346_Figure_2_figure_supplement_5.pdf
- elife_poa_e77346_Figure_3_figure_supplement_2.pdf
- elife_poa_e77346_Figure_3_figure_supplement_1.pdf
- elife_poa_e77346_Figure_4_figure_supplement_1.pdf
- elife_poa_e77346_Figure_5_figure_supplement_1.pdf
- elife_poa_e77346_Supplementary_file_1.xlsx
- elife_poa_e77346_Supplementary_file_2.txt
- elife_poa_e77346_Supplementary_file_3.txt
- elife_poa_e77346_Transparent_Reporting_File.docx
- elife_poa_e77346_Figure_1_source_data_1.xlsx
- elife_poa_e77346_Figure_3_source_data_1.xlsx
- elife_poa_e77346_Figure_3_source_data_2.xlsx
- elife_poa_e77346_Figure_3_source_data_3.xlsx
- elife_poa_e77346_Figure_4_source_data_1.xlsx
- elife_poa_e77346_Figure_4_source_data_2.xlsx
- elife_poa_e77346_Figure_4_source_data_3.xlsx
- elife_poa_e77346_Figure_5_source_data_1.xlsx
- elife_poa_e77346_Figure_5_source_data_2.pdb
- elife_poa_e77346_Figure_6_source_data_1.xlsx
- elife_poa_e77346_Source_data_1.zip
- elife_poa_e77346_Source_data_2.pdf
