# Supplementary material for: Ancestral reconstruction of duplicated signaling proteins reveals the evolution of signaling specificity
Source: eLife journal article supplement (doi:10.7554/elife.77346), 2022-06-10
Supplement: supp [file elife-77346-supp-v1.zip › elife_poa_e77346_Figure_1_source_data_1.xlsx]

## Sheet: Sheet1
HK	RR	0	10sec	30sec	5min	30min
HK1	RR2	1	0.6912	0.7308	0.433	0.0462
HK1	RR1	1	0.5209	0.3203	0.0391	0.0191
HK1	RR2	1	0.8972	0.7357	0.4221	0.0693
HK1	RR1	1	0.5719	0.4563	0.0357	0.0142
HK2	RR2	1	0.5064	0.3063	0.0396	0.0109
HK2	RR1	1	0.68	0.7603	0.8767	0.7317
HK2	RR1	1	0.9791	0.883	0.8883	0.8258
HK2	RR2	1	0.6245	0.2789	0.0553	0.0165
