# Supplementary material for: Ancestral reconstruction of duplicated signaling proteins reveals the evolution of signaling specificity
Source: eLife journal article supplement (doi:10.7554/elife.77346), 2022-06-10
Supplement: supp [file elife-77346-supp-v1.zip › elife_poa_e77346_Figure_3_source_data_1.xlsx]

## Sheet: Sheet1
HK	RR	0	10sec	30sec	5min	30min
ancHK	ancRR1	1	0.9474	1.1155	0.0712	0.0202
ancHK	ancRR1	1	1	0.6419	0.031	0.0306
ancHK2	ancRR1	1	0.9397	0.868	0.6468	0.0719
ancHK2	ancRR1	1	1.0369	1.0547	0.8143	0.1036
ancHK1	ancRR1	1	0.8853	0.7003	0.0615	0.0223
ancHK1	ancRR1	1	0.898	0.7893	0.0653	0.0227
ancHK	ancRR2	1	0.648549	0.763623	0.0487404	0.013828
ancHK	ancRR2	1	0.8412	0.6388	0.1157	0.0374
ancHK2	ancRR2	1	0.598	0.3586	0.0426	0.0033
ancHK2	ancRR2	1	0.768739	0.488963	0.135325	0.00725372
ancHK1	ancRR2	1	0.822	0.5806	0.1544	0.0358
ancHK1	ancRR2	1	0.83778	0.738433	0.229478	0.0150187
