# Supplementary material for: Ancestral reconstruction of duplicated signaling proteins reveals the evolution of signaling specificity
Source: eLife journal article supplement (doi:10.7554/elife.77346), 2022-06-10
Supplement: supp [file elife-77346-supp-v1.zip › elife_poa_e77346_Figure_3_source_data_3.xlsx]

## Sheet: Sheet1
HK	RR	0	10sec	30sec	5min	30min
ancHK2-alt	ancRR-alt	1	1.0403	0.9002	0.4935	0.0935
ancHK2-alt	ancRR1-alt	1	0.9024	0.8529	0.8956	0.6026
ancHK2-alt	ancRR2-alt	1	0.4342	0.0444	0.0056	0.0022
ancHK1-alt	ancRR-alt	1	0.7405	0.7612	0.5963	0.3037
ancHK1-alt	ancRR2-alt	1	0.7995	0.3247	0.1105	0.0695
ancHK1-alt	ancRR1-alt	1	0.9334	0.9379	0.6356	0.1297
ancHK-alt	ancRR2-alt	1	0.7598	0.2514	0.0201	0.0137
ancHK-alt	ancRR1-alt	1	1.0317	0.9507	0.6262	0.1549
ancHK-alt	ancRR-alt	1	0.8759	0.8576	0.7687	0.4061
