# Supplementary material for: Ancestral reconstruction of duplicated signaling proteins reveals the evolution of signaling specificity
Source: eLife journal article supplement (doi:10.7554/elife.77346), 2022-06-10
Supplement: supp [file elife-77346-supp-v1.zip › elife_poa_e77346_Figure_4_source_data_1.xlsx]

## Sheet: Sheet1
HK	RR	0	2 min	5 min
ancHK2	ancRR1	1	0.7779	0.5082
ancHK2	ancRR1	1	1.0365	0.7776
ancHK + A	ancRR1	1	0.5869	0.1545
ancHK + A	ancRR1	1	0.7057	0.2289
ancHK	ancRR1	1	0.2655	0.0637
ancHK	ancRR1	1	0.2603	0.0331
ancHK + Q	ancRR1	1	0.6895	0.2773
ancHK + Q	ancRR1	1	0.626	0.2521
ancHK + QA	ancRR1	1	1.2277	0.7957
ancHK + QA	ancRR1	1	0.8906	0.582
