# Supplementary material for: Ancestral reconstruction of duplicated signaling proteins reveals the evolution of signaling specificity
Source: eLife journal article supplement (doi:10.7554/elife.77346), 2022-06-10
Supplement: supp [file elife-77346-supp-v1.zip › elife_poa_e77346_Figure_4_source_data_2.xlsx]

## Sheet: Sheet1
HK	RR	0	2 min	5 min
ancHK2	ancRR	1	0.6373	0.3495
ancHK2	ancRR	1	0.6059	0.2922
ancHK2	ancRR + E	1	0.7509	0.5013
ancHK2	ancRR + E	1	0.8257	0.5564
ancHK2	ancRR1	1	0.7779	0.5082
ancHK2	ancRR1	1	1.0365	0.7776
