# Supplementary material for: Ancestral reconstruction of duplicated signaling proteins reveals the evolution of signaling specificity
Source: eLife journal article supplement (doi:10.7554/elife.77346), 2022-06-10
Supplement: supp [file elife-77346-supp-v1.zip › elife_poa_e77346_Figure_4_source_data_3.xlsx]

## Sheet: Sheet1
HK	RR	0	2 min	5 min
ancHK2	ancRR2	1	0.2458	0.0656
ancHK2	ancRR2	1	0.228	0.0704
ancHK + A	ancRR2	1	0.5611	0.1938
ancHK + A	ancRR2	1	0.5711	0.2198
ancHK	ancRR2	1	0.7165	0.2299
ancHK	ancRR2	1	0.4768	0.2038
ancHK + Q	ancRR2	1	0.3794	0.1001
ancHK + Q	ancRR2	1	0.4316	0.1244
ancHK + QA	ancRR2	1	0.4549	0.087
ancHK + QA	ancRR2	1	0.4856	0.1325
