# Supplementary material for: Ancestral reconstruction of duplicated signaling proteins reveals the evolution of signaling specificity
Source: eLife journal article supplement (doi:10.7554/elife.77346), 2022-06-10
Supplement: supp [file elife-77346-supp-v1.zip › elife_poa_e77346_Figure_5_source_data_1.xlsx]

## Sheet: Sheet1
HK	RR	0	2 min	5 min
ancHK	ancRR	1	0.8343	0.5891
ancHK	ancRR	1	0.6065	0.3929
ancHK	ancRR + E	1	0.3016	0.1014
ancHK	ancRR + E	1	0.4258	0.2178
ancHK	ancRR1	1	0.2603	0.0331
ancHK	ancRR1	1	0.2655	0.0637
ancHK1	ancRR + E	1	0.3847	0.2014
ancHK1	ancRR + E	1	0.5037	0.2202
ancHK1	ancRR1	1	0.3756	0.075
ancHK1	ancRR	1	0.978	0.7355
ancHK1	ancRR	1	0.9309	0.5534
ancHK1	ancRR1	1	0.2601	0.0396
