# Supplementary material for: Ancestral reconstruction of duplicated signaling proteins reveals the evolution of signaling specificity
Source: eLife journal article supplement (doi:10.7554/elife.77346), 2022-06-10
Supplement: supp [file elife-77346-supp-v1.zip › elife_poa_e77346_Figure_5_source_data_2.pdb]

MODEL     1
ATOM      1  N   ARG A   1     -11.123 -15.063  13.491  1.00 45.73           N  
ATOM      2  CA  ARG A   1     -11.646 -14.778  12.159  1.00 45.73           C  
ATOM      3  C   ARG A   1     -11.792 -13.276  11.938  1.00 45.73           C  
ATOM      4  CB  ARG A   1     -12.993 -15.472  11.950  1.00 45.73           C  
ATOM      5  O   ARG A   1     -11.471 -12.768  10.862  1.00 45.73           O  
ATOM      6  CG  ARG A   1     -12.882 -16.866  11.352  1.00 45.73           C  
ATOM      7  CD  ARG A   1     -14.245 -17.425  10.969  1.00 45.73           C  
ATOM      8  NE  ARG A   1     -14.754 -18.346  11.982  1.00 45.73           N  
ATOM      9  NH1 ARG A   1     -16.952 -18.228  11.283  1.00 45.73           N  
ATOM     10  NH2 ARG A   1     -16.381 -19.550  13.066  1.00 45.73           N  
ATOM     11  CZ  ARG A   1     -16.028 -18.706  12.108  1.00 45.73           C  
ATOM     12  N   GLN A   2     -12.230 -12.482  12.940  1.00 49.18           N  
ATOM     13  CA  GLN A   2     -12.364 -11.030  12.902  1.00 49.18           C  
ATOM     14  C   GLN A   2     -11.005 -10.356  12.738  1.00 49.18           C  
ATOM     15  CB  GLN A   2     -13.054 -10.520  14.168  1.00 49.18           C  
ATOM     16  O   GLN A   2     -10.872  -9.391  11.983  1.00 49.18           O  
ATOM     17  CG  GLN A   2     -13.740  -9.172  13.995  1.00 49.18           C  
ATOM     18  CD  GLN A   2     -14.473  -8.721  15.245  1.00 49.18           C  
ATOM     19  NE2 GLN A   2     -15.024  -7.513  15.205  1.00 49.18           N  
ATOM     20  OE1 GLN A   2     -14.542  -9.453  16.237  1.00 49.18           O  
ATOM     21  N   VAL A   3      -9.914 -10.860  13.421  1.00 53.80           N  
ATOM     22  CA  VAL A   3      -8.576 -10.284  13.335  1.00 53.80           C  
ATOM     23  C   VAL A   3      -8.005 -10.511  11.937  1.00 53.80           C  
ATOM     24  CB  VAL A   3      -7.631 -10.883  14.400  1.00 53.80           C  
ATOM     25  O   VAL A   3      -7.405  -9.606  11.351  1.00 53.80           O  
ATOM     26  CG1 VAL A   3      -6.194 -10.419  14.170  1.00 53.80           C  
ATOM     27  CG2 VAL A   3      -8.101 -10.503  15.804  1.00 53.80           C  
ATOM     28  N   GLU A   4      -8.170 -11.800  11.443  1.00 53.51           N  
ATOM     29  CA  GLU A   4      -7.671 -12.114  10.108  1.00 53.51           C  
ATOM     30  C   GLU A   4      -8.373 -11.274   9.044  1.00 53.51           C  
ATOM     31  CB  GLU A   4      -7.849 -13.604   9.804  1.00 53.51           C  
ATOM     32  O   GLU A   4      -7.737 -10.801   8.100  1.00 53.51           O  
ATOM     33  CG  GLU A   4      -6.800 -14.494  10.453  1.00 53.51           C  
ATOM     34  CD  GLU A   4      -7.040 -15.976  10.216  1.00 53.51           C  
ATOM     35  OE1 GLU A   4      -6.259 -16.808  10.731  1.00 53.51           O  
ATOM     36  OE2 GLU A   4      -8.017 -16.309   9.508  1.00 53.51           O  
ATOM     37  N   GLU A   5      -9.753 -11.114   9.177  1.00 54.46           N  
ATOM     38  CA  GLU A   5     -10.529 -10.283   8.262  1.00 54.46           C  
ATOM     39  C   GLU A   5     -10.070  -8.829   8.312  1.00 54.46           C  
ATOM     40  CB  GLU A   5     -12.022 -10.375   8.587  1.00 54.46           C  
ATOM     41  O   GLU A   5      -9.963  -8.170   7.275  1.00 54.46           O  
ATOM     42  CG  GLU A   5     -12.842 -11.084   7.520  1.00 54.46           C  
ATOM     43  CD  GLU A   5     -14.307 -11.246   7.896  1.00 54.46           C  
ATOM     44  OE1 GLU A   5     -15.087 -11.787   7.080  1.00 54.46           O  
ATOM     45  OE2 GLU A   5     -14.677 -10.827   9.015  1.00 54.46           O  
ATOM     46  N   ARG A   6      -9.667  -8.364   9.448  1.00 57.88           N  
ATOM     47  CA  ARG A   6      -9.191  -6.998   9.637  1.00 57.88           C  
ATOM     48  C   ARG A   6      -7.814  -6.807   9.009  1.00 57.88           C  
ATOM     49  CB  ARG A   6      -9.141  -6.647  11.126  1.00 57.88           C  
ATOM     50  O   ARG A   6      -7.551  -5.781   8.378  1.00 57.88           O  
ATOM     51  CG  ARG A   6     -10.427  -6.035  11.658  1.00 57.88           C  
ATOM     52  CD  ARG A   6     -10.284  -5.590  13.106  1.00 57.88           C  
ATOM     53  NE  ARG A   6     -11.536  -5.054  13.632  1.00 57.88           N  
ATOM     54  NH1 ARG A   6     -11.129  -5.686  15.817  1.00 57.88           N  
ATOM     55  NH2 ARG A   6     -13.070  -4.592  15.278  1.00 57.88           N  
ATOM     56  CZ  ARG A   6     -11.909  -5.112  14.908  1.00 57.88           C  
ATOM     57  N   THR A   7      -6.903  -7.767   9.225  1.00 56.57           N  
ATOM     58  CA  THR A   7      -5.564  -7.709   8.649  1.00 56.57           C  
ATOM     59  C   THR A   7      -5.632  -7.699   7.124  1.00 56.57           C  
ATOM     60  CB  THR A   7      -4.702  -8.896   9.119  1.00 56.57           C  
ATOM     61  O   THR A   7      -4.915  -6.937   6.471  1.00 56.57           O  
ATOM     62  CG2 THR A   7      -3.274  -8.779   8.597  1.00 56.57           C  
ATOM     63  OG1 THR A   7      -4.676  -8.921  10.551  1.00 56.57           O  
ATOM     64  N   ARG A   8      -6.446  -8.671   6.559  1.00 58.61           N  
ATOM     65  CA  ARG A   8      -6.612  -8.734   5.111  1.00 58.61           C  
ATOM     66  C   ARG A   8      -7.170  -7.424   4.566  1.00 58.61           C  
ATOM     67  CB  ARG A   8      -7.531  -9.895   4.725  1.00 58.61           C  
ATOM     68  O   ARG A   8      -6.766  -6.969   3.493  1.00 58.61           O  
ATOM     69  CG  ARG A   8      -6.912 -10.868   3.735  1.00 58.61           C  
ATOM     70  CD  ARG A   8      -7.900 -11.945   3.308  1.00 58.61           C  
ATOM     71  NE  ARG A   8      -7.605 -13.228   3.940  1.00 58.61           N  
ATOM     72  NH1 ARG A   8      -9.691 -14.137   3.543  1.00 58.61           N  
ATOM     73  NH2 ARG A   8      -8.089 -15.364   4.632  1.00 58.61           N  
ATOM     74  CZ  ARG A   8      -8.463 -14.240   4.037  1.00 58.61           C  
ATOM     75  N   MET A   9      -8.079  -6.772   5.319  1.00 60.15           N  
ATOM     76  CA  MET A   9      -8.658  -5.481   4.959  1.00 60.15           C  
ATOM     77  C   MET A   9      -7.593  -4.390   4.951  1.00 60.15           C  
ATOM     78  CB  MET A   9      -9.782  -5.106   5.926  1.00 60.15           C  
ATOM     79  O   MET A   9      -7.523  -3.591   4.014  1.00 60.15           O  
ATOM     80  CG  MET A   9     -10.682  -3.991   5.418  1.00 60.15           C  
ATOM     81  SD  MET A   9     -11.992  -3.541   6.622  1.00 60.15           S  
ATOM     82  CE  MET A   9     -13.020  -2.462   5.588  1.00 60.15           C  
ATOM     83  N   LEU A  10      -6.699  -4.453   5.957  1.00 61.68           N  
ATOM     84  CA  LEU A  10      -5.668  -3.428   6.075  1.00 61.68           C  
ATOM     85  C   LEU A  10      -4.682  -3.512   4.915  1.00 61.68           C  
ATOM     86  CB  LEU A  10      -4.923  -3.569   7.405  1.00 61.68           C  
ATOM     87  O   LEU A  10      -4.268  -2.486   4.371  1.00 61.68           O  
ATOM     88  CG  LEU A  10      -5.682  -3.130   8.658  1.00 61.68           C  
ATOM     89  CD1 LEU A  10      -4.937  -3.575   9.912  1.00 61.68           C  
ATOM     90  CD2 LEU A  10      -5.887  -1.619   8.658  1.00 61.68           C  
ATOM     91  N   ALA A  11      -4.332  -4.739   4.557  1.00 61.91           N  
ATOM     92  CA  ALA A  11      -3.406  -4.933   3.444  1.00 61.91           C  
ATOM     93  C   ALA A  11      -4.009  -4.430   2.135  1.00 61.91           C  
ATOM     94  CB  ALA A  11      -3.025  -6.406   3.319  1.00 61.91           C  
ATOM     95  O   ALA A  11      -3.321  -3.798   1.330  1.00 61.91           O  
ATOM     96  N   GLY A  12      -5.315  -4.676   1.935  1.00 64.80           N  
ATOM     97  CA  GLY A  12      -6.011  -4.233   0.738  1.00 64.80           C  
ATOM     98  C   GLY A  12      -6.129  -2.724   0.639  1.00 64.80           C  
ATOM     99  O   GLY A  12      -5.975  -2.154  -0.443  1.00 64.80           O  
ATOM    100  N   VAL A  13      -6.336  -2.046   1.810  1.00 69.07           N  
ATOM    101  CA  VAL A  13      -6.487  -0.596   1.876  1.00 69.07           C  
ATOM    102  C   VAL A  13      -5.170   0.078   1.499  1.00 69.07           C  
ATOM    103  CB  VAL A  13      -6.940  -0.136   3.280  1.00 69.07           C  
ATOM    104  O   VAL A  13      -5.162   1.077   0.776  1.00 69.07           O  
ATOM    105  CG1 VAL A  13      -6.896   1.387   3.389  1.00 69.07           C  
ATOM    106  CG2 VAL A  13      -8.343  -0.657   3.585  1.00 69.07           C  
ATOM    107  N   SER A  14      -4.078  -0.520   2.080  1.00 70.56           N  
ATOM    108  CA  SER A  14      -2.759   0.028   1.782  1.00 70.56           C  
ATOM    109  C   SER A  14      -2.497   0.051   0.280  1.00 70.56           C  
ATOM    110  CB  SER A  14      -1.670  -0.783   2.485  1.00 70.56           C  
ATOM    111  O   SER A  14      -2.077   1.074  -0.267  1.00 70.56           O  
ATOM    112  OG  SER A  14      -0.407  -0.155   2.347  1.00 70.56           O  
ATOM    113  N   HIS A  15      -2.763  -1.004  -0.366  1.00 72.88           N  
ATOM    114  CA  HIS A  15      -2.544  -1.109  -1.804  1.00 72.88           C  
ATOM    115  C   HIS A  15      -3.413  -0.115  -2.568  1.00 72.88           C  
ATOM    116  CB  HIS A  15      -2.827  -2.533  -2.286  1.00 72.88           C  
ATOM    117  O   HIS A  15      -2.932   0.565  -3.477  1.00 72.88           O  
ATOM    118  CG  HIS A  15      -2.775  -2.684  -3.773  1.00 72.88           C  
ATOM    119  CD2 HIS A  15      -1.743  -2.970  -4.602  1.00 72.88           C  
ATOM    120  ND1 HIS A  15      -3.885  -2.534  -4.576  1.00 72.88           N  
ATOM    121  CE1 HIS A  15      -3.537  -2.722  -5.838  1.00 72.88           C  
ATOM    122  NE2 HIS A  15      -2.243  -2.988  -5.881  1.00 72.88           N  
ATOM    123  N   ASP A  16      -4.559   0.009  -2.245  1.00 77.19           N  
ATOM    124  CA  ASP A  16      -5.526   0.828  -2.968  1.00 77.19           C  
ATOM    125  C   ASP A  16      -5.232   2.315  -2.786  1.00 77.19           C  
ATOM    126  CB  ASP A  16      -6.950   0.513  -2.504  1.00 77.19           C  
ATOM    127  O   ASP A  16      -5.490   3.120  -3.684  1.00 77.19           O  
ATOM    128  CG  ASP A  16      -7.485  -0.788  -3.076  1.00 77.19           C  
ATOM    129  OD1 ASP A  16      -6.821  -1.392  -3.945  1.00 77.19           O  
ATOM    130  OD2 ASP A  16      -8.584  -1.212  -2.655  1.00 77.19           O  
ATOM    131  N   LEU A  17      -4.733   2.674  -1.536  1.00 81.22           N  
ATOM    132  CA  LEU A  17      -4.357   4.065  -1.309  1.00 81.22           C  
ATOM    133  C   LEU A  17      -3.076   4.412  -2.061  1.00 81.22           C  
ATOM    134  CB  LEU A  17      -4.172   4.334   0.187  1.00 81.22           C  
ATOM    135  O   LEU A  17      -2.902   5.547  -2.509  1.00 81.22           O  
ATOM    136  CG  LEU A  17      -5.452   4.499   1.009  1.00 81.22           C  
ATOM    137  CD1 LEU A  17      -5.119   4.589   2.495  1.00 81.22           C  
ATOM    138  CD2 LEU A  17      -6.225   5.731   0.553  1.00 81.22           C  
ATOM    139  N   ARG A  18      -2.223   3.479  -2.270  1.00 82.63           N  
ATOM    140  CA  ARG A  18      -0.923   3.697  -2.894  1.00 82.63           C  
ATOM    141  C   ARG A  18      -1.068   3.936  -4.393  1.00 82.63           C  
ATOM    142  CB  ARG A  18       0.003   2.505  -2.640  1.00 82.63           C  
ATOM    143  O   ARG A  18      -0.273   4.663  -4.991  1.00 82.63           O  
ATOM    144  CG  ARG A  18       0.564   2.451  -1.228  1.00 82.63           C  
ATOM    145  CD  ARG A  18       1.668   1.411  -1.100  1.00 82.63           C  
ATOM    146  NE  ARG A  18       2.282   1.437   0.225  1.00 82.63           N  
ATOM    147  NH1 ARG A  18       3.800  -0.248  -0.218  1.00 82.63           N  
ATOM    148  NH2 ARG A  18       3.765   0.758   1.842  1.00 82.63           N  
ATOM    149  CZ  ARG A  18       3.281   0.649   0.613  1.00 82.63           C  
ATOM    150  N   THR A  19      -2.051   3.360  -5.000  1.00 85.72           N  
ATOM    151  CA  THR A  19      -2.245   3.482  -6.441  1.00 85.72           C  
ATOM    152  C   THR A  19      -2.491   4.936  -6.832  1.00 85.72           C  
ATOM    153  CB  THR A  19      -3.420   2.611  -6.922  1.00 85.72           C  
ATOM    154  O   THR A  19      -1.788   5.483  -7.684  1.00 85.72           O  
ATOM    155  CG2 THR A  19      -3.591   2.705  -8.435  1.00 85.72           C  
ATOM    156  OG1 THR A  19      -3.173   1.246  -6.564  1.00 85.72           O  
ATOM    157  N   PRO A  20      -3.490   5.556  -6.267  1.00 88.63           N  
ATOM    158  CA  PRO A  20      -3.668   6.962  -6.638  1.00 88.63           C  
ATOM    159  C   PRO A  20      -2.472   7.830  -6.253  1.00 88.63           C  
ATOM    160  CB  PRO A  20      -4.917   7.377  -5.856  1.00 88.63           C  
ATOM    161  O   PRO A  20      -2.186   8.826  -6.924  1.00 88.63           O  
ATOM    162  CG  PRO A  20      -5.053   6.349  -4.780  1.00 88.63           C  
ATOM    163  CD  PRO A  20      -4.462   5.060  -5.274  1.00 88.63           C  
ATOM    164  N   LEU A  21      -1.787   7.499  -5.144  1.00 90.13           N  
ATOM    165  CA  LEU A  21      -0.594   8.231  -4.732  1.00 90.13           C  
ATOM    166  C   LEU A  21       0.502   8.121  -5.786  1.00 90.13           C  
ATOM    167  CB  LEU A  21      -0.081   7.706  -3.389  1.00 90.13           C  
ATOM    168  O   LEU A  21       1.198   9.099  -6.067  1.00 90.13           O  
ATOM    169  CG  LEU A  21      -0.768   8.256  -2.138  1.00 90.13           C  
ATOM    170  CD1 LEU A  21      -0.266   7.530  -0.894  1.00 90.13           C  
ATOM    171  CD2 LEU A  21      -0.536   9.758  -2.017  1.00 90.13           C  
ATOM    172  N   THR A  22       0.631   6.887  -6.289  1.00 91.16           N  
ATOM    173  CA  THR A  22       1.617   6.654  -7.338  1.00 91.16           C  
ATOM    174  C   THR A  22       1.296   7.485  -8.577  1.00 91.16           C  
ATOM    175  CB  THR A  22       1.684   5.164  -7.720  1.00 91.16           C  
ATOM    176  O   THR A  22       2.183   8.114  -9.156  1.00 91.16           O  
ATOM    177  CG2 THR A  22       2.732   4.920  -8.802  1.00 91.16           C  
ATOM    178  OG1 THR A  22       2.023   4.394  -6.560  1.00 91.16           O  
ATOM    179  N   ARG A  23       0.039   7.567  -8.959  1.00 93.02           N  
ATOM    180  CA  ARG A  23      -0.380   8.371 -10.102  1.00 93.02           C  
ATOM    181  C   ARG A  23      -0.067   9.847  -9.878  1.00 93.02           C  
ATOM    182  CB  ARG A  23      -1.876   8.187 -10.370  1.00 93.02           C  
ATOM    183  O   ARG A  23       0.455  10.518 -10.770  1.00 93.02           O  
ATOM    184  CG  ARG A  23      -2.239   6.818 -10.921  1.00 93.02           C  
ATOM    185  CD  ARG A  23      -3.728   6.705 -11.216  1.00 93.02           C  
ATOM    186  NE  ARG A  23      -4.145   5.313 -11.362  1.00 93.02           N  
ATOM    187  NH1 ARG A  23      -6.124   5.568 -10.198  1.00 93.02           N  
ATOM    188  NH2 ARG A  23      -5.555   3.525 -11.066  1.00 93.02           N  
ATOM    189  CZ  ARG A  23      -5.274   4.805 -10.875  1.00 93.02           C  
ATOM    190  N   LEU A  24      -0.446  10.308  -8.707  1.00 92.60           N  
ATOM    191  CA  LEU A  24      -0.213  11.709  -8.374  1.00 92.60           C  
ATOM    192  C   LEU A  24       1.273  12.044  -8.441  1.00 92.60           C  
ATOM    193  CB  LEU A  24      -0.758  12.026  -6.979  1.00 92.60           C  
ATOM    194  O   LEU A  24       1.656  13.083  -8.982  1.00 92.60           O  
ATOM    195  CG  LEU A  24      -2.276  12.165  -6.860  1.00 92.60           C  
ATOM    196  CD1 LEU A  24      -2.687  12.249  -5.394  1.00 92.60           C  
ATOM    197  CD2 LEU A  24      -2.763  13.390  -7.628  1.00 92.60           C  
ATOM    198  N   ARG A  25       2.058  11.160  -7.932  1.00 92.55           N  
ATOM    199  CA  ARG A  25       3.503  11.365  -7.919  1.00 92.55           C  
ATOM    200  C   ARG A  25       4.061  11.418  -9.338  1.00 92.55           C  
ATOM    201  CB  ARG A  25       4.197  10.256  -7.125  1.00 92.55           C  
ATOM    202  O   ARG A  25       4.903  12.264  -9.648  1.00 92.55           O  
ATOM    203  CG  ARG A  25       5.588  10.627  -6.637  1.00 92.55           C  
ATOM    204  CD  ARG A  25       6.075   9.681  -5.548  1.00 92.55           C  
ATOM    205  NE  ARG A  25       6.650  10.407  -4.420  1.00 92.55           N  
ATOM    206  NH1 ARG A  25       7.182   8.516  -3.206  1.00 92.55           N  
ATOM    207  NH2 ARG A  25       7.661  10.594  -2.366  1.00 92.55           N  
ATOM    208  CZ  ARG A  25       7.163   9.837  -3.333  1.00 92.55           C  
ATOM    209  N   LEU A  26       3.627  10.490 -10.181  1.00 92.80           N  
ATOM    210  CA  LEU A  26       4.075  10.445 -11.569  1.00 92.80           C  
ATOM    211  C   LEU A  26       3.648  11.703 -12.319  1.00 92.80           C  
ATOM    212  CB  LEU A  26       3.519   9.204 -12.272  1.00 92.80           C  
ATOM    213  O   LEU A  26       4.434  12.277 -13.076  1.00 92.80           O  
ATOM    214  CG  LEU A  26       4.171   7.870 -11.908  1.00 92.80           C  
ATOM    215  CD1 LEU A  26       3.344   6.710 -12.453  1.00 92.80           C  
ATOM    216  CD2 LEU A  26       5.600   7.810 -12.437  1.00 92.80           C  
ATOM    217  N   ARG A  27       2.529  12.237 -12.026  1.00 91.86           N  
ATOM    218  CA  ARG A  27       2.027  13.426 -12.706  1.00 91.86           C  
ATOM    219  C   ARG A  27       2.790  14.671 -12.265  1.00 91.86           C  
ATOM    220  CB  ARG A  27       0.531  13.607 -12.440  1.00 91.86           C  
ATOM    221  O   ARG A  27       3.149  15.511 -13.094  1.00 91.86           O  
ATOM    222  CG  ARG A  27      -0.357  12.694 -13.269  1.00 91.86           C  
ATOM    223  CD  ARG A  27      -1.831  13.041 -13.108  1.00 91.86           C  
ATOM    224  NE  ARG A  27      -2.689  12.083 -13.799  1.00 91.86           N  
ATOM    225  NH1 ARG A  27      -3.288  10.928 -11.890  1.00 91.86           N  
ATOM    226  NH2 ARG A  27      -4.113  10.286 -13.930  1.00 91.86           N  
ATOM    227  CZ  ARG A  27      -3.361  11.101 -13.205  1.00 91.86           C  
ATOM    228  N   VAL A  28       2.931  14.646 -10.931  1.00 90.85           N  
ATOM    229  CA  VAL A  28       3.569  15.825 -10.354  1.00 90.85           C  
ATOM    230  C   VAL A  28       5.002  15.942 -10.870  1.00 90.85           C  
ATOM    231  CB  VAL A  28       3.561  15.776  -8.810  1.00 90.85           C  
ATOM    232  O   VAL A  28       5.524  17.048 -11.026  1.00 90.85           O  
ATOM    233  CG1 VAL A  28       4.518  16.817  -8.232  1.00 90.85           C  
ATOM    234  CG2 VAL A  28       2.146  15.993  -8.277  1.00 90.85           C  
ATOM    235  N   GLU A  29       5.608  14.812 -11.154  1.00 89.60           N  
ATOM    236  CA  GLU A  29       7.000  14.784 -11.595  1.00 89.60           C  
ATOM    237  C   GLU A  29       7.165  15.480 -12.943  1.00 89.60           C  
ATOM    238  CB  GLU A  29       7.508  13.343 -11.681  1.00 89.60           C  
ATOM    239  O   GLU A  29       8.245  15.984 -13.259  1.00 89.60           O  
ATOM    240  CG  GLU A  29       9.015  13.232 -11.864  1.00 89.60           C  
ATOM    241  CD  GLU A  29       9.805  13.808 -10.700  1.00 89.60           C  
ATOM    242  OE1 GLU A  29      10.955  14.257 -10.910  1.00 89.60           O  
ATOM    243  OE2 GLU A  29       9.271  13.809  -9.569  1.00 89.60           O  
ATOM    244  N   MET A  30       6.248  15.513 -13.731  1.00 85.77           N  
ATOM    245  CA  MET A  30       6.302  16.108 -15.063  1.00 85.77           C  
ATOM    246  C   MET A  30       5.921  17.584 -15.015  1.00 85.77           C  
ATOM    247  CB  MET A  30       5.378  15.360 -16.025  1.00 85.77           C  
ATOM    248  O   MET A  30       5.867  18.250 -16.050  1.00 85.77           O  
ATOM    249  CG  MET A  30       5.770  13.908 -16.246  1.00 85.77           C  
ATOM    250  SD  MET A  30       4.531  12.989 -17.240  1.00 85.77           S  
ATOM    251  CE  MET A  30       4.936  13.599 -18.900  1.00 85.77           C  
ATOM    252  N   MET A  31       5.863  18.134 -13.756  1.00 84.75           N  
ATOM    253  CA  MET A  31       5.506  19.534 -13.543  1.00 84.75           C  
ATOM    254  C   MET A  31       6.755  20.398 -13.400  1.00 84.75           C  
ATOM    255  CB  MET A  31       4.622  19.682 -12.304  1.00 84.75           C  
ATOM    256  O   MET A  31       7.846  19.883 -13.149  1.00 84.75           O  
ATOM    257  CG  MET A  31       3.250  19.046 -12.450  1.00 84.75           C  
ATOM    258  SD  MET A  31       2.250  19.170 -10.916  1.00 84.75           S  
ATOM    259  CE  MET A  31       1.818  20.931 -10.957  1.00 84.75           C  
ATOM    260  N   PRO A  32       6.490  21.777 -13.501  1.00 81.27           N  
ATOM    261  CA  PRO A  32       7.602  22.689 -13.224  1.00 81.27           C  
ATOM    262  C   PRO A  32       8.101  22.593 -11.784  1.00 81.27           C  
ATOM    263  CB  PRO A  32       7.004  24.070 -13.504  1.00 81.27           C  
ATOM    264  O   PRO A  32       7.345  22.201 -10.891  1.00 81.27           O  
ATOM    265  CG  PRO A  32       5.767  23.796 -14.298  1.00 81.27           C  
ATOM    266  CD  PRO A  32       5.292  22.408 -13.978  1.00 81.27           C  
ATOM    267  N   ASP A  33       9.380  23.032 -11.506  1.00 83.21           N  
ATOM    268  CA  ASP A  33      10.179  22.719 -10.325  1.00 83.21           C  
ATOM    269  C   ASP A  33       9.533  23.281  -9.061  1.00 83.21           C  
ATOM    270  CB  ASP A  33      11.600  23.265 -10.478  1.00 83.21           C  
ATOM    271  O   ASP A  33       9.427  22.584  -8.049  1.00 83.21           O  
ATOM    272  CG  ASP A  33      12.473  22.405 -11.373  1.00 83.21           C  
ATOM    273  OD1 ASP A  33      12.069  21.271 -11.712  1.00 83.21           O  
ATOM    274  OD2 ASP A  33      13.577  22.862 -11.741  1.00 83.21           O  
ATOM    275  N   ASP A  34       8.979  24.570  -9.156  1.00 82.82           N  
ATOM    276  CA  ASP A  34       8.492  25.163  -7.914  1.00 82.82           C  
ATOM    277  C   ASP A  34       7.225  24.462  -7.430  1.00 82.82           C  
ATOM    278  CB  ASP A  34       8.227  26.658  -8.101  1.00 82.82           C  
ATOM    279  O   ASP A  34       7.120  24.099  -6.257  1.00 82.82           O  
ATOM    280  CG  ASP A  34       9.501  27.473  -8.248  1.00 82.82           C  
ATOM    281  OD1 ASP A  34      10.585  26.982  -7.866  1.00 82.82           O  
ATOM    282  OD2 ASP A  34       9.418  28.616  -8.746  1.00 82.82           O  
ATOM    283  N   GLU A  35       6.256  24.194  -8.299  1.00 82.89           N  
ATOM    284  CA  GLU A  35       5.000  23.539  -7.946  1.00 82.89           C  
ATOM    285  C   GLU A  35       5.214  22.058  -7.648  1.00 82.89           C  
ATOM    286  CB  GLU A  35       3.973  23.706  -9.069  1.00 82.89           C  
ATOM    287  O   GLU A  35       4.564  21.497  -6.764  1.00 82.89           O  
ATOM    288  CG  GLU A  35       3.427  25.121  -9.198  1.00 82.89           C  
ATOM    289  CD  GLU A  35       2.349  25.253 -10.262  1.00 82.89           C  
ATOM    290  OE1 GLU A  35       1.817  26.371 -10.451  1.00 82.89           O  
ATOM    291  OE2 GLU A  35       2.033  24.231 -10.911  1.00 82.89           O  
ATOM    292  N   ARG A  36       6.162  21.536  -8.303  1.00 87.74           N  
ATOM    293  CA  ARG A  36       6.493  20.124  -8.141  1.00 87.74           C  
ATOM    294  C   ARG A  36       6.986  19.837  -6.726  1.00 87.74           C  
ATOM    295  CB  ARG A  36       7.551  19.699  -9.161  1.00 87.74           C  
ATOM    296  O   ARG A  36       6.529  18.888  -6.085  1.00 87.74           O  
ATOM    297  CG  ARG A  36       7.930  18.229  -9.078  1.00 87.74           C  
ATOM    298  CD  ARG A  36       9.060  17.883 -10.038  1.00 87.74           C  
ATOM    299  NE  ARG A  36      10.310  18.536  -9.657  1.00 87.74           N  
ATOM    300  NH1 ARG A  36      10.846  19.216 -11.799  1.00 87.74           N  
ATOM    301  NH2 ARG A  36      12.241  19.715 -10.049  1.00 87.74           N  
ATOM    302  CZ  ARG A  36      11.130  19.154 -10.503  1.00 87.74           C  
ATOM    303  N   ARG A  37       7.901  20.669  -6.228  1.00 86.59           N  
ATOM    304  CA  ARG A  37       8.502  20.459  -4.915  1.00 86.59           C  
ATOM    305  C   ARG A  37       7.450  20.526  -3.813  1.00 86.59           C  
ATOM    306  CB  ARG A  37       9.600  21.492  -4.654  1.00 86.59           C  
ATOM    307  O   ARG A  37       7.451  19.704  -2.894  1.00 86.59           O  
ATOM    308  CG  ARG A  37      10.897  21.215  -5.398  1.00 86.59           C  
ATOM    309  CD  ARG A  37      11.977  22.228  -5.047  1.00 86.59           C  
ATOM    310  NE  ARG A  37      12.472  22.922  -6.232  1.00 86.59           N  
ATOM    311  NH1 ARG A  37      13.611  24.552  -5.057  1.00 86.59           N  
ATOM    312  NH2 ARG A  37      13.631  24.559  -7.350  1.00 86.59           N  
ATOM    313  CZ  ARG A  37      13.237  24.009  -6.210  1.00 86.59           C  
ATOM    314  N   LYS A  38       6.569  21.461  -3.937  1.00 86.01           N  
ATOM    315  CA  LYS A  38       5.522  21.646  -2.937  1.00 86.01           C  
ATOM    316  C   LYS A  38       4.537  20.481  -2.950  1.00 86.01           C  
ATOM    317  CB  LYS A  38       4.780  22.963  -3.173  1.00 86.01           C  
ATOM    318  O   LYS A  38       4.155  19.972  -1.894  1.00 86.01           O  
ATOM    319  CG  LYS A  38       5.620  24.203  -2.909  1.00 86.01           C  
ATOM    320  CD  LYS A  38       4.820  25.479  -3.136  1.00 86.01           C  
ATOM    321  CE  LYS A  38       5.675  26.722  -2.926  1.00 86.01           C  
ATOM    322  NZ  LYS A  38       4.916  27.973  -3.223  1.00 86.01           N  
ATOM    323  N   MET A  39       4.160  20.016  -4.061  1.00 88.30           N  
ATOM    324  CA  MET A  39       3.199  18.925  -4.199  1.00 88.30           C  
ATOM    325  C   MET A  39       3.815  17.599  -3.764  1.00 88.30           C  
ATOM    326  CB  MET A  39       2.704  18.823  -5.642  1.00 88.30           C  
ATOM    327  O   MET A  39       3.156  16.788  -3.111  1.00 88.30           O  
ATOM    328  CG  MET A  39       1.794  19.967  -6.060  1.00 88.30           C  
ATOM    329  SD  MET A  39       1.218  19.809  -7.795  1.00 88.30           S  
ATOM    330  CE  MET A  39      -0.044  18.520  -7.596  1.00 88.30           C  
ATOM    331  N   VAL A  40       5.057  17.458  -4.178  1.00 87.41           N  
ATOM    332  CA  VAL A  40       5.759  16.245  -3.769  1.00 87.41           C  
ATOM    333  C   VAL A  40       5.841  16.185  -2.245  1.00 87.41           C  
ATOM    334  CB  VAL A  40       7.176  16.175  -4.382  1.00 87.41           C  
ATOM    335  O   VAL A  40       5.677  15.117  -1.651  1.00 87.41           O  
ATOM    336  CG1 VAL A  40       8.006  15.090  -3.699  1.00 87.41           C  
ATOM    337  CG2 VAL A  40       7.094  15.922  -5.886  1.00 87.41           C  
ATOM    338  N   ARG A  41       6.012  17.351  -1.657  1.00 85.48           N  
ATOM    339  CA  ARG A  41       6.044  17.422  -0.199  1.00 85.48           C  
ATOM    340  C   ARG A  41       4.703  17.009   0.398  1.00 85.48           C  
ATOM    341  CB  ARG A  41       6.412  18.833   0.263  1.00 85.48           C  
ATOM    342  O   ARG A  41       4.658  16.273   1.386  1.00 85.48           O  
ATOM    343  CG  ARG A  41       7.893  19.154   0.143  1.00 85.48           C  
ATOM    344  CD  ARG A  41       8.259  20.422   0.902  1.00 85.48           C  
ATOM    345  NE  ARG A  41       7.638  21.603   0.310  1.00 85.48           N  
ATOM    346  NH1 ARG A  41       9.633  22.633  -0.236  1.00 85.48           N  
ATOM    347  NH2 ARG A  41       7.640  23.651  -0.730  1.00 85.48           N  
ATOM    348  CZ  ARG A  41       8.305  22.626  -0.217  1.00 85.48           C  
ATOM    349  N   ASP A  42       3.640  17.465  -0.140  1.00 86.86           N  
ATOM    350  CA  ASP A  42       2.298  17.132   0.328  1.00 86.86           C  
ATOM    351  C   ASP A  42       2.006  15.644   0.146  1.00 86.86           C  
ATOM    352  CB  ASP A  42       1.249  17.968  -0.408  1.00 86.86           C  
ATOM    353  O   ASP A  42       1.418  15.010   1.024  1.00 86.86           O  
ATOM    354  CG  ASP A  42       1.255  19.428   0.008  1.00 86.86           C  
ATOM    355  OD1 ASP A  42       1.706  19.740   1.132  1.00 86.86           O  
ATOM    356  OD2 ASP A  42       0.802  20.274  -0.793  1.00 86.86           O  
ATOM    357  N   ILE A  43       2.428  15.119  -0.964  1.00 88.95           N  
ATOM    358  CA  ILE A  43       2.234  13.701  -1.247  1.00 88.95           C  
ATOM    359  C   ILE A  43       3.040  12.862  -0.259  1.00 88.95           C  
ATOM    360  CB  ILE A  43       2.636  13.354  -2.698  1.00 88.95           C  
ATOM    361  O   ILE A  43       2.545  11.860   0.263  1.00 88.95           O  
ATOM    362  CG1 ILE A  43       1.651  13.983  -3.691  1.00 88.95           C  
ATOM    363  CG2 ILE A  43       2.713  11.837  -2.889  1.00 88.95           C  
ATOM    364  CD1 ILE A  43       2.088  13.882  -5.145  1.00 88.95           C  
ATOM    365  N   ASP A  44       4.292  13.294   0.026  1.00 84.18           N  
ATOM    366  CA  ASP A  44       5.141  12.601   0.991  1.00 84.18           C  
ATOM    367  C   ASP A  44       4.510  12.605   2.381  1.00 84.18           C  
ATOM    368  CB  ASP A  44       6.529  13.243   1.041  1.00 84.18           C  
ATOM    369  O   ASP A  44       4.565  11.602   3.096  1.00 84.18           O  
ATOM    370  CG  ASP A  44       7.378  12.917  -0.175  1.00 84.18           C  
ATOM    371  OD1 ASP A  44       7.071  11.939  -0.889  1.00 84.18           O  
ATOM    372  OD2 ASP A  44       8.365  13.644  -0.420  1.00 84.18           O  
ATOM    373  N   GLU A  45       3.992  13.779   2.709  1.00 81.10           N  
ATOM    374  CA  GLU A  45       3.308  13.892   3.994  1.00 81.10           C  
ATOM    375  C   GLU A  45       2.126  12.931   4.076  1.00 81.10           C  
ATOM    376  CB  GLU A  45       2.836  15.329   4.227  1.00 81.10           C  
ATOM    377  O   GLU A  45       1.940  12.251   5.088  1.00 81.10           O  
ATOM    378  CG  GLU A  45       2.253  15.567   5.613  1.00 81.10           C  
ATOM    379  CD  GLU A  45       1.857  17.015   5.856  1.00 81.10           C  
ATOM    380  OE1 GLU A  45       1.348  17.328   6.957  1.00 81.10           O  
ATOM    381  OE2 GLU A  45       2.055  17.842   4.939  1.00 81.10           O  
ATOM    382  N   MET A  46       1.385  12.794   3.032  1.00 84.06           N  
ATOM    383  CA  MET A  46       0.239  11.891   2.976  1.00 84.06           C  
ATOM    384  C   MET A  46       0.684  10.438   3.103  1.00 84.06           C  
ATOM    385  CB  MET A  46      -0.538  12.088   1.673  1.00 84.06           C  
ATOM    386  O   MET A  46       0.077   9.662   3.843  1.00 84.06           O  
ATOM    387  CG  MET A  46      -1.421  13.325   1.666  1.00 84.06           C  
ATOM    388  SD  MET A  46      -2.489  13.419   0.177  1.00 84.06           S  
ATOM    389  CE  MET A  46      -1.222  13.502  -1.120  1.00 84.06           C  
ATOM    390  N   GLU A  47       1.707  10.153   2.340  1.00 81.33           N  
ATOM    391  CA  GLU A  47       2.256   8.801   2.384  1.00 81.33           C  
ATOM    392  C   GLU A  47       2.683   8.425   3.799  1.00 81.33           C  
ATOM    393  CB  GLU A  47       3.443   8.672   1.425  1.00 81.33           C  
ATOM    394  O   GLU A  47       2.379   7.328   4.274  1.00 81.33           O  
ATOM    395  CG  GLU A  47       4.027   7.268   1.355  1.00 81.33           C  
ATOM    396  CD  GLU A  47       5.233   7.166   0.435  1.00 81.33           C  
ATOM    397  OE1 GLU A  47       5.799   6.058   0.298  1.00 81.33           O  
ATOM    398  OE2 GLU A  47       5.615   8.202  -0.153  1.00 81.33           O  
ATOM    399  N   ALA A  48       3.340   9.297   4.420  1.00 77.07           N  
ATOM    400  CA  ALA A  48       3.810   9.046   5.780  1.00 77.07           C  
ATOM    401  C   ALA A  48       2.639   8.845   6.737  1.00 77.07           C  
ATOM    402  CB  ALA A  48       4.692  10.197   6.259  1.00 77.07           C  
ATOM    403  O   ALA A  48       2.674   7.959   7.594  1.00 77.07           O  
ATOM    404  N   MET A  49       1.606   9.628   6.581  1.00 74.92           N  
ATOM    405  CA  MET A  49       0.426   9.542   7.436  1.00 74.92           C  
ATOM    406  C   MET A  49      -0.309   8.224   7.218  1.00 74.92           C  
ATOM    407  CB  MET A  49      -0.517  10.717   7.172  1.00 74.92           C  
ATOM    408  O   MET A  49      -0.730   7.577   8.179  1.00 74.92           O  
ATOM    409  CG  MET A  49      -0.042  12.032   7.769  1.00 74.92           C  
ATOM    410  SD  MET A  49      -1.303  13.359   7.641  1.00 74.92           S  
ATOM    411  CE  MET A  49      -0.766  14.164   6.106  1.00 74.92           C  
ATOM    412  N   ILE A  50      -0.416   7.838   5.976  1.00 77.18           N  
ATOM    413  CA  ILE A  50      -1.096   6.598   5.618  1.00 77.18           C  
ATOM    414  C   ILE A  50      -0.318   5.405   6.169  1.00 77.18           C  
ATOM    415  CB  ILE A  50      -1.264   6.467   4.088  1.00 77.18           C  
ATOM    416  O   ILE A  50      -0.904   4.486   6.746  1.00 77.18           O  
ATOM    417  CG1 ILE A  50      -2.315   7.461   3.580  1.00 77.18           C  
ATOM    418  CG2 ILE A  50      -1.638   5.032   3.706  1.00 77.18           C  
ATOM    419  CD1 ILE A  50      -2.374   7.577   2.063  1.00 77.18           C  
ATOM    420  N   ASP A  51       1.023   5.468   5.964  1.00 74.51           N  
ATOM    421  CA  ASP A  51       1.876   4.403   6.484  1.00 74.51           C  
ATOM    422  C   ASP A  51       1.746   4.287   8.001  1.00 74.51           C  
ATOM    423  CB  ASP A  51       3.336   4.648   6.098  1.00 74.51           C  
ATOM    424  O   ASP A  51       1.654   3.181   8.538  1.00 74.51           O  
ATOM    425  CG  ASP A  51       3.626   4.333   4.641  1.00 74.51           C  
ATOM    426  OD1 ASP A  51       2.822   3.623   3.999  1.00 74.51           O  
ATOM    427  OD2 ASP A  51       4.670   4.795   4.131  1.00 74.51           O  
ATOM    428  N   ALA A  52       1.800   5.417   8.664  1.00 69.97           N  
ATOM    429  CA  ALA A  52       1.683   5.437  10.120  1.00 69.97           C  
ATOM    430  C   ALA A  52       0.324   4.907  10.568  1.00 69.97           C  
ATOM    431  CB  ALA A  52       1.900   6.852  10.652  1.00 69.97           C  
ATOM    432  O   ALA A  52       0.237   4.130  11.521  1.00 69.97           O  
ATOM    433  N   PHE A  53      -0.649   5.348   9.866  1.00 69.57           N  
ATOM    434  CA  PHE A  53      -2.013   4.929  10.165  1.00 69.57           C  
ATOM    435  C   PHE A  53      -2.172   3.425   9.971  1.00 69.57           C  
ATOM    436  CB  PHE A  53      -3.014   5.681   9.282  1.00 69.57           C  
ATOM    437  O   PHE A  53      -2.746   2.742  10.821  1.00 69.57           O  
ATOM    438  CG  PHE A  53      -4.450   5.316   9.545  1.00 69.57           C  
ATOM    439  CD1 PHE A  53      -5.154   4.520   8.651  1.00 69.57           C  
ATOM    440  CD2 PHE A  53      -5.095   5.769  10.689  1.00 69.57           C  
ATOM    441  CE1 PHE A  53      -6.484   4.180   8.892  1.00 69.57           C  
ATOM    442  CE2 PHE A  53      -6.424   5.434  10.936  1.00 69.57           C  
ATOM    443  CZ  PHE A  53      -7.116   4.640  10.036  1.00 69.57           C  
ATOM    444  N   LEU A  54      -1.811   2.838   8.770  1.00 69.92           N  
ATOM    445  CA  LEU A  54      -1.911   1.416   8.459  1.00 69.92           C  
ATOM    446  C   LEU A  54      -1.117   0.583   9.460  1.00 69.92           C  
ATOM    447  CB  LEU A  54      -1.411   1.141   7.039  1.00 69.92           C  
ATOM    448  O   LEU A  54      -1.539  -0.513   9.835  1.00 69.92           O  
ATOM    449  CG  LEU A  54      -2.315   1.615   5.899  1.00 69.92           C  
ATOM    450  CD1 LEU A  54      -1.610   1.441   4.557  1.00 69.92           C  
ATOM    451  CD2 LEU A  54      -3.638   0.857   5.915  1.00 69.92           C  
ATOM    452  N   ALA A  55       0.035   1.095   9.808  1.00 66.13           N  
ATOM    453  CA  ALA A  55       0.844   0.413  10.815  1.00 66.13           C  
ATOM    454  C   ALA A  55       0.084   0.280  12.131  1.00 66.13           C  
ATOM    455  CB  ALA A  55       2.158   1.158  11.035  1.00 66.13           C  
ATOM    456  O   ALA A  55       0.145  -0.762  12.788  1.00 66.13           O  
ATOM    457  N   PHE A  56      -0.602   1.215  12.444  1.00 63.02           N  
ATOM    458  CA  PHE A  56      -1.395   1.223  13.667  1.00 63.02           C  
ATOM    459  C   PHE A  56      -2.585   0.277  13.547  1.00 63.02           C  
ATOM    460  CB  PHE A  56      -1.882   2.640  13.985  1.00 63.02           C  
ATOM    461  O   PHE A  56      -2.890  -0.466  14.482  1.00 63.02           O  
ATOM    462  CG  PHE A  56      -2.720   2.729  15.232  1.00 63.02           C  
ATOM    463  CD1 PHE A  56      -4.106   2.781  15.152  1.00 63.02           C  
ATOM    464  CD2 PHE A  56      -2.120   2.762  16.485  1.00 63.02           C  
ATOM    465  CE1 PHE A  56      -4.884   2.863  16.305  1.00 63.02           C  
ATOM    466  CE2 PHE A  56      -2.891   2.844  17.641  1.00 63.02           C  
ATOM    467  CZ  PHE A  56      -4.273   2.895  17.548  1.00 63.02           C  
ATOM    468  N   ALA A  57      -3.445   0.437  12.390  1.00 60.09           N  
ATOM    469  CA  ALA A  57      -4.654  -0.340  12.128  1.00 60.09           C  
ATOM    470  C   ALA A  57      -4.349  -1.835  12.095  1.00 60.09           C  
ATOM    471  CB  ALA A  57      -5.293   0.099  10.813  1.00 60.09           C  
ATOM    472  O   ALA A  57      -5.183  -2.653  12.490  1.00 60.09           O  
ATOM    473  N   ARG A  58      -3.259  -2.317  11.425  1.00 59.59           N  
ATOM    474  CA  ARG A  58      -2.870  -3.721  11.351  1.00 59.59           C  
ATOM    475  C   ARG A  58      -2.744  -4.329  12.744  1.00 59.59           C  
ATOM    476  CB  ARG A  58      -1.552  -3.876  10.590  1.00 59.59           C  
ATOM    477  O   ARG A  58      -3.004  -5.519  12.933  1.00 59.59           O  
ATOM    478  CG  ARG A  58      -1.726  -4.163   9.107  1.00 59.59           C  
ATOM    479  CD  ARG A  58      -0.392  -4.433   8.425  1.00 59.59           C  
ATOM    480  NE  ARG A  58      -0.199  -3.574   7.260  1.00 59.59           N  
ATOM    481  NH1 ARG A  58       1.951  -4.297   6.824  1.00 59.59           N  
ATOM    482  NH2 ARG A  58       0.978  -2.710   5.487  1.00 59.59           N  
ATOM    483  CZ  ARG A  58       0.909  -3.529   6.526  1.00 59.59           C  
ATOM    484  N   GLY A  59      -3.070  -3.519  13.654  1.00 53.59           N  
ATOM    485  CA  GLY A  59      -3.031  -4.070  15.000  1.00 53.59           C  
ATOM    486  C   GLY A  59      -1.796  -4.909  15.266  1.00 53.59           C  
ATOM    487  O   GLY A  59      -1.112  -5.330  14.331  1.00 53.59           O  
ATOM    488  N   GLU A  60      -1.130  -4.782  16.397  1.00 51.58           N  
ATOM    489  CA  GLU A  60       0.015  -5.431  17.028  1.00 51.58           C  
ATOM    490  C   GLU A  60      -0.242  -6.921  17.238  1.00 51.58           C  
ATOM    491  CB  GLU A  60       0.345  -4.761  18.364  1.00 51.58           C  
ATOM    492  O   GLU A  60       0.650  -7.656  17.667  1.00 51.58           O  
ATOM    493  CG  GLU A  60       0.769  -3.305  18.233  1.00 51.58           C  
ATOM    494  CD  GLU A  60       0.989  -2.621  19.573  1.00 51.58           C  
ATOM    495  OE1 GLU A  60       1.299  -1.409  19.592  1.00 51.58           O  
ATOM    496  OE2 GLU A  60       0.850  -3.304  20.612  1.00 51.58           O  
ATOM    497  N   ALA A  61      -1.493  -7.442  16.880  1.00 48.06           N  
ATOM    498  CA  ALA A  61      -1.854  -8.801  17.272  1.00 48.06           C  
ATOM    499  C   ALA A  61      -1.380  -9.816  16.236  1.00 48.06           C  
ATOM    500  CB  ALA A  61      -3.364  -8.914  17.470  1.00 48.06           C  
ATOM    501  O   ALA A  61      -1.410 -11.024  16.481  1.00 48.06           O  
ATOM    502  N   ALA A  62      -0.704  -9.348  15.201  1.00 54.02           N  
ATOM    503  CA  ALA A  62      -0.457 -10.471  14.301  1.00 54.02           C  
ATOM    504  C   ALA A  62       0.886 -11.130  14.602  1.00 54.02           C  
ATOM    505  CB  ALA A  62      -0.504 -10.008  12.847  1.00 54.02           C  
ATOM    506  O   ALA A  62       1.123 -12.276  14.213  1.00 54.02           O  
ATOM    507  N   GLU A  63       1.663 -10.400  15.490  1.00 67.42           N  
ATOM    508  CA  GLU A  63       2.972 -10.996  15.740  1.00 67.42           C  
ATOM    509  C   GLU A  63       3.011 -11.694  17.096  1.00 67.42           C  
ATOM    510  CB  GLU A  63       4.071  -9.933  15.664  1.00 67.42           C  
ATOM    511  O   GLU A  63       2.768 -11.068  18.130  1.00 67.42           O  
ATOM    512  CG  GLU A  63       5.481 -10.500  15.740  1.00 67.42           C  
ATOM    513  CD  GLU A  63       6.558  -9.427  15.770  1.00 67.42           C  
ATOM    514  OE1 GLU A  63       7.761  -9.774  15.733  1.00 67.42           O  
ATOM    515  OE2 GLU A  63       6.196  -8.231  15.831  1.00 67.42           O  
ATOM    516  N   PRO A  64       3.194 -13.005  17.109  1.00 76.08           N  
ATOM    517  CA  PRO A  64       3.291 -13.660  18.416  1.00 76.08           C  
ATOM    518  C   PRO A  64       4.522 -13.222  19.206  1.00 76.08           C  
ATOM    519  CB  PRO A  64       3.372 -15.147  18.060  1.00 76.08           C  
ATOM    520  O   PRO A  64       5.570 -12.940  18.618  1.00 76.08           O  
ATOM    521  CG  PRO A  64       3.841 -15.175  16.641  1.00 76.08           C  
ATOM    522  CD  PRO A  64       3.468 -13.874  15.989  1.00 76.08           C  
ATOM    523  N   PRO A  65       4.344 -13.086  20.490  1.00 84.68           N  
ATOM    524  CA  PRO A  65       5.512 -12.780  21.319  1.00 84.68           C  
ATOM    525  C   PRO A  65       6.534 -13.914  21.339  1.00 84.68           C  
ATOM    526  CB  PRO A  65       4.911 -12.562  22.709  1.00 84.68           C  
ATOM    527  O   PRO A  65       6.159 -15.089  21.312  1.00 84.68           O  
ATOM    528  CG  PRO A  65       3.558 -13.193  22.644  1.00 84.68           C  
ATOM    529  CD  PRO A  65       3.163 -13.325  21.201  1.00 84.68           C  
ATOM    530  N   GLU A  66       7.838 -13.539  21.145  1.00 91.23           N  
ATOM    531  CA  GLU A  66       8.943 -14.489  21.237  1.00 91.23           C  
ATOM    532  C   GLU A  66      10.077 -13.935  22.095  1.00 91.23           C  
ATOM    533  CB  GLU A  66       9.464 -14.844  19.842  1.00 91.23           C  
ATOM    534  O   GLU A  66      10.123 -12.735  22.373  1.00 91.23           O  
ATOM    535  CG  GLU A  66       9.993 -13.650  19.060  1.00 91.23           C  
ATOM    536  CD  GLU A  66      10.421 -14.001  17.644  1.00 91.23           C  
ATOM    537  OE1 GLU A  66      11.024 -13.142  16.962  1.00 91.23           O  
ATOM    538  OE2 GLU A  66      10.149 -15.144  17.213  1.00 91.23           O  
ATOM    539  N   PRO A  67      10.875 -14.879  22.630  1.00 92.93           N  
ATOM    540  CA  PRO A  67      12.027 -14.385  23.389  1.00 92.93           C  
ATOM    541  C   PRO A  67      12.934 -13.479  22.561  1.00 92.93           C  
ATOM    542  CB  PRO A  67      12.758 -15.667  23.794  1.00 92.93           C  
ATOM    543  O   PRO A  67      13.342 -13.849  21.457  1.00 92.93           O  
ATOM    544  CG  PRO A  67      11.747 -16.754  23.622  1.00 92.93           C  
ATOM    545  CD  PRO A  67      10.753 -16.321  22.583  1.00 92.93           C  
ATOM    546  N   VAL A  68      13.129 -12.218  23.013  1.00 93.14           N  
ATOM    547  CA  VAL A  68      13.925 -11.235  22.286  1.00 93.14           C  
ATOM    548  C   VAL A  68      15.074 -10.748  23.166  1.00 93.14           C  
ATOM    549  CB  VAL A  68      13.065 -10.038  21.821  1.00 93.14           C  
ATOM    550  O   VAL A  68      14.862 -10.364  24.318  1.00 93.14           O  
ATOM    551  CG1 VAL A  68      13.934  -8.977  21.148  1.00 93.14           C  
ATOM    552  CG2 VAL A  68      11.963 -10.510  20.874  1.00 93.14           C  
ATOM    553  N   ASP A  69      16.275 -10.837  22.642  1.00 93.88           N  
ATOM    554  CA  ASP A  69      17.434 -10.206  23.266  1.00 93.88           C  
ATOM    555  C   ASP A  69      17.419  -8.694  23.050  1.00 93.88           C  
ATOM    556  CB  ASP A  69      18.732 -10.803  22.717  1.00 93.88           C  
ATOM    557  O   ASP A  69      17.766  -8.213  21.969  1.00 93.88           O  
ATOM    558  CG  ASP A  69      19.970 -10.278  23.421  1.00 93.88           C  
ATOM    559  OD1 ASP A  69      19.881  -9.253  24.131  1.00 93.88           O  
ATOM    560  OD2 ASP A  69      21.047 -10.894  23.263  1.00 93.88           O  
ATOM    561  N   LEU A  70      17.115  -7.910  24.076  1.00 94.48           N  
ATOM    562  CA  LEU A  70      16.890  -6.476  23.928  1.00 94.48           C  
ATOM    563  C   LEU A  70      18.195  -5.750  23.618  1.00 94.48           C  
ATOM    564  CB  LEU A  70      16.260  -5.898  25.198  1.00 94.48           C  
ATOM    565  O   LEU A  70      18.208  -4.791  22.843  1.00 94.48           O  
ATOM    566  CG  LEU A  70      14.768  -6.171  25.399  1.00 94.48           C  
ATOM    567  CD1 LEU A  70      14.297  -5.588  26.728  1.00 94.48           C  
ATOM    568  CD2 LEU A  70      13.958  -5.599  24.241  1.00 94.48           C  
ATOM    569  N   ALA A  71      19.274  -6.178  24.202  1.00 93.54           N  
ATOM    570  CA  ALA A  71      20.577  -5.573  23.940  1.00 93.54           C  
ATOM    571  C   ALA A  71      20.955  -5.701  22.467  1.00 93.54           C  
ATOM    572  CB  ALA A  71      21.649  -6.214  24.818  1.00 93.54           C  
ATOM    573  O   ALA A  71      21.431  -4.742  21.855  1.00 93.54           O  
ATOM    574  N   ALA A  72      20.741  -6.920  21.955  1.00 93.26           N  
ATOM    575  CA  ALA A  72      21.041  -7.168  20.547  1.00 93.26           C  
ATOM    576  C   ALA A  72      20.162  -6.311  19.641  1.00 93.26           C  
ATOM    577  CB  ALA A  72      20.858  -8.647  20.216  1.00 93.26           C  
ATOM    578  O   ALA A  72      20.640  -5.750  18.652  1.00 93.26           O  
ATOM    579  N   LEU A  73      18.902  -6.293  19.952  1.00 93.80           N  
ATOM    580  CA  LEU A  73      17.961  -5.497  19.171  1.00 93.80           C  
ATOM    581  C   LEU A  73      18.355  -4.024  19.183  1.00 93.80           C  
ATOM    582  CB  LEU A  73      16.539  -5.662  19.714  1.00 93.80           C  
ATOM    583  O   LEU A  73      18.388  -3.377  18.133  1.00 93.80           O  
ATOM    584  CG  LEU A  73      15.448  -4.851  19.014  1.00 93.80           C  
ATOM    585  CD1 LEU A  73      15.374  -5.225  17.537  1.00 93.80           C  
ATOM    586  CD2 LEU A  73      14.101  -5.068  19.694  1.00 93.80           C  
ATOM    587  N   LEU A  74      18.658  -3.422  20.333  1.00 95.82           N  
ATOM    588  CA  LEU A  74      19.059  -2.026  20.467  1.00 95.82           C  
ATOM    589  C   LEU A  74      20.346  -1.754  19.695  1.00 95.82           C  
ATOM    590  CB  LEU A  74      19.248  -1.661  21.941  1.00 95.82           C  
ATOM    591  O   LEU A  74      20.480  -0.710  19.052  1.00 95.82           O  
ATOM    592  CG  LEU A  74      17.973  -1.392  22.742  1.00 95.82           C  
ATOM    593  CD1 LEU A  74      18.277  -1.378  24.236  1.00 95.82           C  
ATOM    594  CD2 LEU A  74      17.337  -0.075  22.308  1.00 95.82           C  
ATOM    595  N   GLU A  75      21.251  -2.715  19.782  1.00 94.48           N  
ATOM    596  CA  GLU A  75      22.505  -2.575  19.048  1.00 94.48           C  
ATOM    597  C   GLU A  75      22.256  -2.455  17.547  1.00 94.48           C  
ATOM    598  CB  GLU A  75      23.431  -3.760  19.335  1.00 94.48           C  
ATOM    599  O   GLU A  75      22.868  -1.622  16.876  1.00 94.48           O  
ATOM    600  CG  GLU A  75      24.861  -3.552  18.859  1.00 94.48           C  
ATOM    601  CD  GLU A  75      25.809  -4.652  19.310  1.00 94.48           C  
ATOM    602  OE1 GLU A  75      27.032  -4.537  19.068  1.00 94.48           O  
ATOM    603  OE2 GLU A  75      25.325  -5.638  19.910  1.00 94.48           O  
ATOM    604  N   GLU A  76      21.409  -3.298  17.083  1.00 92.58           N  
ATOM    605  CA  GLU A  76      21.068  -3.272  15.663  1.00 92.58           C  
ATOM    606  C   GLU A  76      20.472  -1.925  15.264  1.00 92.58           C  
ATOM    607  CB  GLU A  76      20.091  -4.401  15.324  1.00 92.58           C  
ATOM    608  O   GLU A  76      20.861  -1.345  14.248  1.00 92.58           O  
ATOM    609  CG  GLU A  76      20.720  -5.787  15.351  1.00 92.58           C  
ATOM    610  CD  GLU A  76      19.723  -6.903  15.083  1.00 92.58           C  
ATOM    611  OE1 GLU A  76      20.031  -8.078  15.388  1.00 92.58           O  
ATOM    612  OE2 GLU A  76      18.625  -6.601  14.564  1.00 92.58           O  
ATOM    613  N   VAL A  77      19.506  -1.474  16.040  1.00 93.10           N  
ATOM    614  CA  VAL A  77      18.817  -0.225  15.729  1.00 93.10           C  
ATOM    615  C   VAL A  77      19.804   0.938  15.785  1.00 93.10           C  
ATOM    616  CB  VAL A  77      17.639   0.029  16.697  1.00 93.10           C  
ATOM    617  O   VAL A  77      19.816   1.794  14.898  1.00 93.10           O  
ATOM    618  CG1 VAL A  77      17.002   1.391  16.427  1.00 93.10           C  
ATOM    619  CG2 VAL A  77      16.600  -1.084  16.575  1.00 93.10           C  
ATOM    620  N   VAL A  78      20.623   1.004  16.788  1.00 94.17           N  
ATOM    621  CA  VAL A  78      21.614   2.061  16.962  1.00 94.17           C  
ATOM    622  C   VAL A  78      22.612   2.030  15.807  1.00 94.17           C  
ATOM    623  CB  VAL A  78      22.356   1.927  18.311  1.00 94.17           C  
ATOM    624  O   VAL A  78      22.974   3.077  15.263  1.00 94.17           O  
ATOM    625  CG1 VAL A  78      23.586   2.832  18.343  1.00 94.17           C  
ATOM    626  CG2 VAL A  78      21.417   2.255  19.470  1.00 94.17           C  
ATOM    627  N   ASP A  79      23.044   0.832  15.430  1.00 92.00           N  
ATOM    628  CA  ASP A  79      23.980   0.682  14.321  1.00 92.00           C  
ATOM    629  C   ASP A  79      23.392   1.240  13.027  1.00 92.00           C  
ATOM    630  CB  ASP A  79      24.360  -0.789  14.135  1.00 92.00           C  
ATOM    631  O   ASP A  79      24.103   1.860  12.233  1.00 92.00           O  
ATOM    632  CG  ASP A  79      25.362  -1.277  15.166  1.00 92.00           C  
ATOM    633  OD1 ASP A  79      25.934  -0.445  15.902  1.00 92.00           O  
ATOM    634  OD2 ASP A  79      25.584  -2.505  15.240  1.00 92.00           O  
ATOM    635  N   ASP A  80      22.084   1.002  12.856  1.00 88.83           N  
ATOM    636  CA  ASP A  80      21.412   1.520  11.669  1.00 88.83           C  
ATOM    637  C   ASP A  80      21.523   3.041  11.595  1.00 88.83           C  
ATOM    638  CB  ASP A  80      19.941   1.099  11.657  1.00 88.83           C  
ATOM    639  O   ASP A  80      21.807   3.598  10.532  1.00 88.83           O  
ATOM    640  CG  ASP A  80      19.749  -0.374  11.339  1.00 88.83           C  
ATOM    641  OD1 ASP A  80      20.715  -1.035  10.900  1.00 88.83           O  
ATOM    642  OD2 ASP A  80      18.621  -0.878  11.527  1.00 88.83           O  
ATOM    643  N   PHE A  81      21.368   3.673  12.667  1.00 89.68           N  
ATOM    644  CA  PHE A  81      21.404   5.130  12.684  1.00 89.68           C  
ATOM    645  C   PHE A  81      22.839   5.637  12.605  1.00 89.68           C  
ATOM    646  CB  PHE A  81      20.725   5.671  13.947  1.00 89.68           C  
ATOM    647  O   PHE A  81      23.109   6.655  11.963  1.00 89.68           O  
ATOM    648  CG  PHE A  81      19.224   5.725  13.853  1.00 89.68           C  
ATOM    649  CD1 PHE A  81      18.585   6.853  13.354  1.00 89.68           C  
ATOM    650  CD2 PHE A  81      18.452   4.646  14.265  1.00 89.68           C  
ATOM    651  CE1 PHE A  81      17.196   6.905  13.266  1.00 89.68           C  
ATOM    652  CE2 PHE A  81      17.064   4.691  14.181  1.00 89.68           C  
ATOM    653  CZ  PHE A  81      16.437   5.822  13.682  1.00 89.68           C  
ATOM    654  N   ALA A  82      23.693   4.941  13.236  1.00 88.28           N  
ATOM    655  CA  ALA A  82      25.106   5.298  13.146  1.00 88.28           C  
ATOM    656  C   ALA A  82      25.602   5.218  11.705  1.00 88.28           C  
ATOM    657  CB  ALA A  82      25.943   4.390  14.044  1.00 88.28           C  
ATOM    658  O   ALA A  82      26.343   6.091  11.247  1.00 88.28           O  
ATOM    659  N   ASP A  83      25.205   4.193  11.005  1.00 86.31           N  
ATOM    660  CA  ASP A  83      25.587   3.999   9.609  1.00 86.31           C  
ATOM    661  C   ASP A  83      25.090   5.150   8.738  1.00 86.31           C  
ATOM    662  CB  ASP A  83      25.043   2.668   9.084  1.00 86.31           C  
ATOM    663  O   ASP A  83      25.681   5.448   7.698  1.00 86.31           O  
ATOM    664  CG  ASP A  83      25.768   1.463   9.657  1.00 86.31           C  
ATOM    665  OD1 ASP A  83      26.862   1.630  10.238  1.00 86.31           O  
ATOM    666  OD2 ASP A  83      25.242   0.337   9.524  1.00 86.31           O  
ATOM    667  N   MET A  84      24.059   5.839   9.202  1.00 82.85           N  
ATOM    668  CA  MET A  84      23.492   6.968   8.470  1.00 82.85           C  
ATOM    669  C   MET A  84      24.171   8.273   8.872  1.00 82.85           C  
ATOM    670  CB  MET A  84      21.985   7.067   8.716  1.00 82.85           C  
ATOM    671  O   MET A  84      23.758   9.351   8.442  1.00 82.85           O  
ATOM    672  CG  MET A  84      21.189   5.921   8.111  1.00 82.85           C  
ATOM    673  SD  MET A  84      19.401   6.020   8.510  1.00 82.85           S  
ATOM    674  CE  MET A  84      18.883   7.308   7.342  1.00 82.85           C  
ATOM    675  N   GLY A  85      25.117   8.147   9.750  1.00 86.76           N  
ATOM    676  CA  GLY A  85      25.897   9.310  10.143  1.00 86.76           C  
ATOM    677  C   GLY A  85      25.403   9.955  11.424  1.00 86.76           C  
ATOM    678  O   GLY A  85      25.865  11.034  11.799  1.00 86.76           O  
ATOM    679  N   ALA A  86      24.419   9.364  12.061  1.00 90.62           N  
ATOM    680  CA  ALA A  86      23.881   9.933  13.293  1.00 90.62           C  
ATOM    681  C   ALA A  86      24.774   9.604  14.486  1.00 90.62           C  
ATOM    682  CB  ALA A  86      22.462   9.426  13.539  1.00 90.62           C  
ATOM    683  O   ALA A  86      25.446   8.570  14.500  1.00 90.62           O  
ATOM    684  N   GLU A  87      24.925  10.521  15.418  1.00 92.59           N  
ATOM    685  CA  GLU A  87      25.687  10.307  16.644  1.00 92.59           C  
ATOM    686  C   GLU A  87      24.825   9.659  17.724  1.00 92.59           C  
ATOM    687  CB  GLU A  87      26.266  11.628  17.155  1.00 92.59           C  
ATOM    688  O   GLU A  87      24.207  10.355  18.532  1.00 92.59           O  
ATOM    689  CG  GLU A  87      27.481  12.110  16.375  1.00 92.59           C  
ATOM    690  CD  GLU A  87      28.140  13.336  16.987  1.00 92.59           C  
ATOM    691  OE1 GLU A  87      29.094  13.877  16.385  1.00 92.59           O  
ATOM    692  OE2 GLU A  87      27.698  13.758  18.080  1.00 92.59           O  
ATOM    693  N   VAL A  88      24.817   8.307  17.752  1.00 95.37           N  
ATOM    694  CA  VAL A  88      24.007   7.549  18.700  1.00 95.37           C  
ATOM    695  C   VAL A  88      24.876   6.510  19.406  1.00 95.37           C  
ATOM    696  CB  VAL A  88      22.813   6.860  18.002  1.00 95.37           C  
ATOM    697  O   VAL A  88      25.611   5.762  18.758  1.00 95.37           O  
ATOM    698  CG1 VAL A  88      21.868   6.243  19.032  1.00 95.37           C  
ATOM    699  CG2 VAL A  88      22.067   7.855  17.116  1.00 95.37           C  
ATOM    700  N   THR A  89      24.824   6.486  20.727  1.00 94.77           N  
ATOM    701  CA  THR A  89      25.606   5.530  21.504  1.00 94.77           C  
ATOM    702  C   THR A  89      24.692   4.630  22.332  1.00 94.77           C  
ATOM    703  CB  THR A  89      26.603   6.247  22.432  1.00 94.77           C  
ATOM    704  O   THR A  89      23.595   5.038  22.718  1.00 94.77           O  
ATOM    705  CG2 THR A  89      27.633   7.035  21.629  1.00 94.77           C  
ATOM    706  OG1 THR A  89      25.888   7.149  23.286  1.00 94.77           O  
ATOM    707  N   LEU A  90      25.165   3.420  22.549  1.00 96.70           N  
ATOM    708  CA  LEU A  90      24.401   2.438  23.311  1.00 96.70           C  
ATOM    709  C   LEU A  90      25.182   1.972  24.535  1.00 96.70           C  
ATOM    710  CB  LEU A  90      24.044   1.237  22.431  1.00 96.70           C  
ATOM    711  O   LEU A  90      26.362   1.630  24.430  1.00 96.70           O  
ATOM    712  CG  LEU A  90      23.411   0.040  23.142  1.00 96.70           C  
ATOM    713  CD1 LEU A  90      22.030   0.408  23.672  1.00 96.70           C  
ATOM    714  CD2 LEU A  90      23.327  -1.157  22.201  1.00 96.70           C  
ATOM    715  N   ASP A  91      24.548   2.059  25.687  1.00 95.88           N  
ATOM    716  CA  ASP A  91      25.031   1.486  26.939  1.00 95.88           C  
ATOM    717  C   ASP A  91      24.106   0.374  27.427  1.00 95.88           C  
ATOM    718  CB  ASP A  91      25.161   2.571  28.011  1.00 95.88           C  
ATOM    719  O   ASP A  91      23.052   0.646  28.007  1.00 95.88           O  
ATOM    720  CG  ASP A  91      25.759   2.054  29.308  1.00 95.88           C  
ATOM    721  OD1 ASP A  91      26.410   0.987  29.297  1.00 95.88           O  
ATOM    722  OD2 ASP A  91      25.574   2.719  30.350  1.00 95.88           O  
ATOM    723  N   ALA A  92      24.537  -0.876  27.252  1.00 92.35           N  
ATOM    724  CA  ALA A  92      23.767  -2.044  27.673  1.00 92.35           C  
ATOM    725  C   ALA A  92      24.667  -3.087  28.329  1.00 92.35           C  
ATOM    726  CB  ALA A  92      23.032  -2.654  26.481  1.00 92.35           C  
ATOM    727  O   ALA A  92      25.097  -4.043  27.679  1.00 92.35           O  
ATOM    728  N   PRO A  93      25.055  -2.959  29.586  1.00 83.52           N  
ATOM    729  CA  PRO A  93      26.075  -3.774  30.249  1.00 83.52           C  
ATOM    730  C   PRO A  93      25.677  -5.245  30.356  1.00 83.52           C  
ATOM    731  CB  PRO A  93      26.188  -3.137  31.637  1.00 83.52           C  
ATOM    732  O   PRO A  93      26.535  -6.128  30.273  1.00 83.52           O  
ATOM    733  CG  PRO A  93      24.914  -2.375  31.812  1.00 83.52           C  
ATOM    734  CD  PRO A  93      24.391  -2.002  30.454  1.00 83.52           C  
ATOM    735  N   GLU A  94      24.348  -5.474  30.532  1.00 82.83           N  
ATOM    736  CA  GLU A  94      23.908  -6.853  30.726  1.00 82.83           C  
ATOM    737  C   GLU A  94      22.873  -7.254  29.678  1.00 82.83           C  
ATOM    738  CB  GLU A  94      23.333  -7.041  32.132  1.00 82.83           C  
ATOM    739  O   GLU A  94      21.983  -6.469  29.344  1.00 82.83           O  
ATOM    740  CG  GLU A  94      24.353  -6.846  33.244  1.00 82.83           C  
ATOM    741  CD  GLU A  94      23.776  -7.069  34.633  1.00 82.83           C  
ATOM    742  OE1 GLU A  94      24.527  -6.950  35.628  1.00 82.83           O  
ATOM    743  OE2 GLU A  94      22.564  -7.365  34.727  1.00 82.83           O  
ATOM    744  N   PRO A  95      23.041  -8.480  29.096  1.00 84.27           N  
ATOM    745  CA  PRO A  95      21.991  -8.960  28.193  1.00 84.27           C  
ATOM    746  C   PRO A  95      20.670  -9.223  28.912  1.00 84.27           C  
ATOM    747  CB  PRO A  95      22.575 -10.259  27.632  1.00 84.27           C  
ATOM    748  O   PRO A  95      20.664  -9.744  30.030  1.00 84.27           O  
ATOM    749  CG  PRO A  95      23.694 -10.607  28.560  1.00 84.27           C  
ATOM    750  CD  PRO A  95      24.048  -9.386  29.359  1.00 84.27           C  
ATOM    751  N   VAL A  96      19.570  -8.754  28.342  1.00 90.17           N  
ATOM    752  CA  VAL A  96      18.232  -8.924  28.898  1.00 90.17           C  
ATOM    753  C   VAL A  96      17.307  -9.529  27.845  1.00 90.17           C  
ATOM    754  CB  VAL A  96      17.655  -7.584  29.408  1.00 90.17           C  
ATOM    755  O   VAL A  96      17.225  -9.028  26.720  1.00 90.17           O  
ATOM    756  CG1 VAL A  96      16.261  -7.787  30.000  1.00 90.17           C  
ATOM    757  CG2 VAL A  96      18.592  -6.959  30.440  1.00 90.17           C  
ATOM    758  N   THR A  97      16.696 -10.610  28.270  1.00 91.60           N  
ATOM    759  CA  THR A  97      15.744 -11.241  27.363  1.00 91.60           C  
ATOM    760  C   THR A  97      14.314 -11.037  27.853  1.00 91.60           C  
ATOM    761  CB  THR A  97      16.029 -12.746  27.213  1.00 91.60           C  
ATOM    762  O   THR A  97      14.023 -11.235  29.035  1.00 91.60           O  
ATOM    763  CG2 THR A  97      15.108 -13.380  26.175  1.00 91.60           C  
ATOM    764  OG1 THR A  97      17.390 -12.931  26.804  1.00 91.60           O  
ATOM    765  N   VAL A  98      13.447 -10.558  26.912  1.00 91.64           N  
ATOM    766  CA  VAL A  98      12.045 -10.331  27.246  1.00 91.64           C  
ATOM    767  C   VAL A  98      11.150 -11.008  26.210  1.00 91.64           C  
ATOM    768  CB  VAL A  98      11.718  -8.824  27.330  1.00 91.64           C  
ATOM    769  O   VAL A  98      11.566 -11.224  25.069  1.00 91.64           O  
ATOM    770  CG1 VAL A  98      12.537  -8.153  28.432  1.00 91.64           C  
ATOM    771  CG2 VAL A  98      11.972  -8.147  25.984  1.00 91.64           C  
ATOM    772  N   ARG A  99      10.051 -11.478  26.733  1.00 91.28           N  
ATOM    773  CA  ARG A  99       9.030 -11.938  25.797  1.00 91.28           C  
ATOM    774  C   ARG A  99       8.332 -10.760  25.125  1.00 91.28           C  
ATOM    775  CB  ARG A  99       8.003 -12.818  26.512  1.00 91.28           C  
ATOM    776  O   ARG A  99       7.577 -10.029  25.770  1.00 91.28           O  
ATOM    777  CG  ARG A  99       8.432 -14.268  26.663  1.00 91.28           C  
ATOM    778  CD  ARG A  99       7.254 -15.174  26.991  1.00 91.28           C  
ATOM    779  NE  ARG A  99       6.427 -15.430  25.815  1.00 91.28           N  
ATOM    780  NH1 ARG A  99       6.983 -17.667  25.655  1.00 91.28           N  
ATOM    781  NH2 ARG A  99       5.537 -16.729  24.144  1.00 91.28           N  
ATOM    782  CZ  ARG A  99       6.318 -16.608  25.207  1.00 91.28           C  
ATOM    783  N   ALA A 100       8.677 -10.588  23.839  1.00 91.20           N  
ATOM    784  CA  ALA A 100       8.156  -9.415  23.142  1.00 91.20           C  
ATOM    785  C   ALA A 100       7.903  -9.719  21.668  1.00 91.20           C  
ATOM    786  CB  ALA A 100       9.122  -8.241  23.281  1.00 91.20           C  
ATOM    787  O   ALA A 100       8.183 -10.825  21.199  1.00 91.20           O  
ATOM    788  N   ARG A 101       7.335  -8.818  21.066  1.00 87.60           N  
ATOM    789  CA  ARG A 101       7.153  -8.837  19.618  1.00 87.60           C  
ATOM    790  C   ARG A 101       8.248  -8.040  18.918  1.00 87.60           C  
ATOM    791  CB  ARG A 101       5.778  -8.282  19.241  1.00 87.60           C  
ATOM    792  O   ARG A 101       8.185  -6.810  18.856  1.00 87.60           O  
ATOM    793  CG  ARG A 101       4.616  -9.040  19.862  1.00 87.60           C  
ATOM    794  CD  ARG A 101       3.279  -8.394  19.529  1.00 87.60           C  
ATOM    795  NE  ARG A 101       2.165  -9.115  20.139  1.00 87.60           N  
ATOM    796  NH1 ARG A 101       2.099  -7.816  22.048  1.00 87.60           N  
ATOM    797  NH2 ARG A 101       0.619  -9.546  21.782  1.00 87.60           N  
ATOM    798  CZ  ARG A 101       1.630  -8.824  21.322  1.00 87.60           C  
ATOM    799  N   PRO A 102       9.252  -8.697  18.285  1.00 86.42           N  
ATOM    800  CA  PRO A 102      10.500  -8.089  17.820  1.00 86.42           C  
ATOM    801  C   PRO A 102      10.272  -6.988  16.787  1.00 86.42           C  
ATOM    802  CB  PRO A 102      11.257  -9.268  17.203  1.00 86.42           C  
ATOM    803  O   PRO A 102      10.875  -5.916  16.878  1.00 86.42           O  
ATOM    804  CG  PRO A 102      10.656 -10.482  17.835  1.00 86.42           C  
ATOM    805  CD  PRO A 102       9.240 -10.165  18.222  1.00 86.42           C  
ATOM    806  N   VAL A 103       9.428  -7.136  15.836  1.00 81.93           N  
ATOM    807  CA  VAL A 103       9.211  -6.156  14.776  1.00 81.93           C  
ATOM    808  C   VAL A 103       8.575  -4.896  15.359  1.00 81.93           C  
ATOM    809  CB  VAL A 103       8.324  -6.728  13.648  1.00 81.93           C  
ATOM    810  O   VAL A 103       8.997  -3.780  15.048  1.00 81.93           O  
ATOM    811  CG1 VAL A 103       8.012  -5.653  12.608  1.00 81.93           C  
ATOM    812  CG2 VAL A 103       9.003  -7.929  12.992  1.00 81.93           C  
ATOM    813  N   ALA A 104       7.590  -5.118  16.222  1.00 82.95           N  
ATOM    814  CA  ALA A 104       6.902  -3.987  16.838  1.00 82.95           C  
ATOM    815  C   ALA A 104       7.846  -3.196  17.740  1.00 82.95           C  
ATOM    816  CB  ALA A 104       5.692  -4.470  17.634  1.00 82.95           C  
ATOM    817  O   ALA A 104       7.863  -1.964  17.701  1.00 82.95           O  
ATOM    818  N   LEU A 105       8.612  -3.964  18.505  1.00 88.62           N  
ATOM    819  CA  LEU A 105       9.549  -3.324  19.423  1.00 88.62           C  
ATOM    820  C   LEU A 105      10.637  -2.580  18.656  1.00 88.62           C  
ATOM    821  CB  LEU A 105      10.182  -4.362  20.353  1.00 88.62           C  
ATOM    822  O   LEU A 105      11.033  -1.478  19.044  1.00 88.62           O  
ATOM    823  CG  LEU A 105      10.922  -3.816  21.575  1.00 88.62           C  
ATOM    824  CD1 LEU A 105      10.000  -2.921  22.397  1.00 88.62           C  
ATOM    825  CD2 LEU A 105      11.465  -4.958  22.426  1.00 88.62           C  
ATOM    826  N   ARG A 106      11.168  -3.167  17.651  1.00 89.74           N  
ATOM    827  CA  ARG A 106      12.152  -2.501  16.804  1.00 89.74           C  
ATOM    828  C   ARG A 106      11.601  -1.192  16.250  1.00 89.74           C  
ATOM    829  CB  ARG A 106      12.581  -3.417  15.655  1.00 89.74           C  
ATOM    830  O   ARG A 106      12.297  -0.174  16.240  1.00 89.74           O  
ATOM    831  CG  ARG A 106      13.595  -2.790  14.713  1.00 89.74           C  
ATOM    832  CD  ARG A 106      13.905  -3.699  13.532  1.00 89.74           C  
ATOM    833  NE  ARG A 106      14.875  -4.732  13.887  1.00 89.74           N  
ATOM    834  NH1 ARG A 106      16.730  -3.476  13.321  1.00 89.74           N  
ATOM    835  NH2 ARG A 106      16.985  -5.605  14.130  1.00 89.74           N  
ATOM    836  CZ  ARG A 106      16.194  -4.602  13.778  1.00 89.74           C  
ATOM    837  N   ARG A 107      10.451  -1.203  15.853  1.00 85.25           N  
ATOM    838  CA  ARG A 107       9.783  -0.020  15.320  1.00 85.25           C  
ATOM    839  C   ARG A 107       9.686   1.076  16.376  1.00 85.25           C  
ATOM    840  CB  ARG A 107       8.387  -0.377  14.806  1.00 85.25           C  
ATOM    841  O   ARG A 107       9.976   2.241  16.097  1.00 85.25           O  
ATOM    842  CG  ARG A 107       7.673   0.773  14.113  1.00 85.25           C  
ATOM    843  CD  ARG A 107       6.353   0.329  13.498  1.00 85.25           C  
ATOM    844  NE  ARG A 107       5.617   1.455  12.930  1.00 85.25           N  
ATOM    845  NH1 ARG A 107       3.752   0.216  12.362  1.00 85.25           N  
ATOM    846  NH2 ARG A 107       3.821   2.463  11.914  1.00 85.25           N  
ATOM    847  CZ  ARG A 107       4.398   1.375  12.403  1.00 85.25           C  
ATOM    848  N   ALA A 108       9.167   0.707  17.552  1.00 88.83           N  
ATOM    849  CA  ALA A 108       9.051   1.663  18.650  1.00 88.83           C  
ATOM    850  C   ALA A 108      10.397   2.311  18.958  1.00 88.83           C  
ATOM    851  CB  ALA A 108       8.495   0.978  19.896  1.00 88.83           C  
ATOM    852  O   ALA A 108      10.497   3.537  19.051  1.00 88.83           O  
ATOM    853  N   LEU A 109      11.399   1.508  18.949  1.00 93.33           N  
ATOM    854  CA  LEU A 109      12.736   1.985  19.284  1.00 93.33           C  
ATOM    855  C   LEU A 109      13.298   2.859  18.168  1.00 93.33           C  
ATOM    856  CB  LEU A 109      13.676   0.805  19.547  1.00 93.33           C  
ATOM    857  O   LEU A 109      13.905   3.899  18.434  1.00 93.33           O  
ATOM    858  CG  LEU A 109      13.365  -0.049  20.777  1.00 93.33           C  
ATOM    859  CD1 LEU A 109      14.220  -1.312  20.775  1.00 93.33           C  
ATOM    860  CD2 LEU A 109      13.588   0.753  22.055  1.00 93.33           C  
ATOM    861  N   SER A 110      13.124   2.433  16.983  1.00 90.11           N  
ATOM    862  CA  SER A 110      13.568   3.222  15.838  1.00 90.11           C  
ATOM    863  C   SER A 110      12.904   4.595  15.821  1.00 90.11           C  
ATOM    864  CB  SER A 110      13.270   2.486  14.531  1.00 90.11           C  
ATOM    865  O   SER A 110      13.563   5.606  15.571  1.00 90.11           O  
ATOM    866  OG  SER A 110      14.088   1.335  14.404  1.00 90.11           O  
ATOM    867  N   ASN A 111      11.586   4.608  16.090  1.00 86.75           N  
ATOM    868  CA  ASN A 111      10.839   5.861  16.110  1.00 86.75           C  
ATOM    869  C   ASN A 111      11.327   6.788  17.219  1.00 86.75           C  
ATOM    870  CB  ASN A 111       9.341   5.590  16.265  1.00 86.75           C  
ATOM    871  O   ASN A 111      11.453   7.997  17.013  1.00 86.75           O  
ATOM    872  CG  ASN A 111       8.668   5.259  14.947  1.00 86.75           C  
ATOM    873  ND2 ASN A 111       7.583   4.497  15.011  1.00 86.75           N  
ATOM    874  OD1 ASN A 111       9.120   5.684  13.881  1.00 86.75           O  
ATOM    875  N   LEU A 112      11.625   6.208  18.312  1.00 91.08           N  
ATOM    876  CA  LEU A 112      12.105   6.984  19.451  1.00 91.08           C  
ATOM    877  C   LEU A 112      13.470   7.597  19.154  1.00 91.08           C  
ATOM    878  CB  LEU A 112      12.189   6.104  20.701  1.00 91.08           C  
ATOM    879  O   LEU A 112      13.681   8.790  19.382  1.00 91.08           O  
ATOM    880  CG  LEU A 112      10.879   5.875  21.457  1.00 91.08           C  
ATOM    881  CD1 LEU A 112      11.072   4.823  22.545  1.00 91.08           C  
ATOM    882  CD2 LEU A 112      10.370   7.182  22.055  1.00 91.08           C  
ATOM    883  N   ILE A 113      14.360   6.810  18.625  1.00 92.00           N  
ATOM    884  CA  ILE A 113      15.722   7.250  18.339  1.00 92.00           C  
ATOM    885  C   ILE A 113      15.708   8.257  17.191  1.00 92.00           C  
ATOM    886  CB  ILE A 113      16.641   6.057  17.995  1.00 92.00           C  
ATOM    887  O   ILE A 113      16.439   9.250  17.219  1.00 92.00           O  
ATOM    888  CG1 ILE A 113      16.793   5.132  19.208  1.00 92.00           C  
ATOM    889  CG2 ILE A 113      18.006   6.550  17.507  1.00 92.00           C  
ATOM    890  CD1 ILE A 113      17.575   3.858  18.921  1.00 92.00           C  
ATOM    891  N   ASP A 114      14.903   7.990  16.219  1.00 88.15           N  
ATOM    892  CA  ASP A 114      14.752   8.922  15.106  1.00 88.15           C  
ATOM    893  C   ASP A 114      14.334  10.305  15.600  1.00 88.15           C  
ATOM    894  CB  ASP A 114      13.729   8.393  14.098  1.00 88.15           C  
ATOM    895  O   ASP A 114      14.891  11.318  15.171  1.00 88.15           O  
ATOM    896  CG  ASP A 114      13.654   9.230  12.833  1.00 88.15           C  
ATOM    897  OD1 ASP A 114      14.689   9.404  12.155  1.00 88.15           O  
ATOM    898  OD2 ASP A 114      12.550   9.723  12.514  1.00 88.15           O  
ATOM    899  N   ASN A 115      13.366  10.296  16.528  1.00 87.63           N  
ATOM    900  CA  ASN A 115      12.922  11.562  17.101  1.00 87.63           C  
ATOM    901  C   ASN A 115      14.046  12.258  17.863  1.00 87.63           C  
ATOM    902  CB  ASN A 115      11.716  11.343  18.017  1.00 87.63           C  
ATOM    903  O   ASN A 115      14.219  13.473  17.750  1.00 87.63           O  
ATOM    904  CG  ASN A 115      10.428  11.130  17.246  1.00 87.63           C  
ATOM    905  ND2 ASN A 115       9.414  10.600  17.919  1.00 87.63           N  
ATOM    906  OD1 ASN A 115      10.345  11.439  16.054  1.00 87.63           O  
ATOM    907  N   ALA A 116      14.739  11.522  18.535  1.00 89.85           N  
ATOM    908  CA  ALA A 116      15.843  12.052  19.332  1.00 89.85           C  
ATOM    909  C   ALA A 116      16.930  12.643  18.439  1.00 89.85           C  
ATOM    910  CB  ALA A 116      16.427  10.960  20.225  1.00 89.85           C  
ATOM    911  O   ALA A 116      17.483  13.702  18.742  1.00 89.85           O  
ATOM    912  N   VAL A 117      17.261  11.996  17.358  1.00 88.63           N  
ATOM    913  CA  VAL A 117      18.283  12.432  16.411  1.00 88.63           C  
ATOM    914  C   VAL A 117      17.835  13.720  15.724  1.00 88.63           C  
ATOM    915  CB  VAL A 117      18.582  11.343  15.357  1.00 88.63           C  
ATOM    916  O   VAL A 117      18.634  14.641  15.535  1.00 88.63           O  
ATOM    917  CG1 VAL A 117      19.444  11.906  14.228  1.00 88.63           C  
ATOM    918  CG2 VAL A 117      19.268  10.144  16.010  1.00 88.63           C  
ATOM    919  N   ARG A 118      16.655  13.809  15.423  1.00 83.25           N  
ATOM    920  CA  ARG A 118      16.120  14.969  14.718  1.00 83.25           C  
ATOM    921  C   ARG A 118      16.184  16.218  15.591  1.00 83.25           C  
ATOM    922  CB  ARG A 118      14.678  14.712  14.276  1.00 83.25           C  
ATOM    923  O   ARG A 118      16.499  17.306  15.104  1.00 83.25           O  
ATOM    924  CG  ARG A 118      14.557  13.788  13.074  1.00 83.25           C  
ATOM    925  CD  ARG A 118      13.109  13.616  12.638  1.00 83.25           C  
ATOM    926  NE  ARG A 118      12.992  12.699  11.508  1.00 83.25           N  
ATOM    927  NH1 ARG A 118      10.721  13.017  11.220  1.00 83.25           N  
ATOM    928  NH2 ARG A 118      11.867  11.584   9.846  1.00 83.25           N  
ATOM    929  CZ  ARG A 118      11.860  12.435  10.861  1.00 83.25           C  
ATOM    930  N   TYR A 119      16.039  16.022  16.928  1.00 82.29           N  
ATOM    931  CA  TYR A 119      15.898  17.194  17.785  1.00 82.29           C  
ATOM    932  C   TYR A 119      17.170  17.439  18.588  1.00 82.29           C  
ATOM    933  CB  TYR A 119      14.706  17.027  18.732  1.00 82.29           C  
ATOM    934  O   TYR A 119      17.430  18.563  19.023  1.00 82.29           O  
ATOM    935  CG  TYR A 119      13.367  17.084  18.038  1.00 82.29           C  
ATOM    936  CD1 TYR A 119      12.784  18.305  17.704  1.00 82.29           C  
ATOM    937  CD2 TYR A 119      12.681  15.918  17.717  1.00 82.29           C  
ATOM    938  CE1 TYR A 119      11.550  18.362  17.067  1.00 82.29           C  
ATOM    939  CE2 TYR A 119      11.445  15.963  17.079  1.00 82.29           C  
ATOM    940  OH  TYR A 119       9.666  17.239  16.127  1.00 82.29           O  
ATOM    941  CZ  TYR A 119      10.889  17.188  16.758  1.00 82.29           C  
ATOM    942  N   GLY A 120      18.003  16.470  18.954  1.00 77.83           N  
ATOM    943  CA  GLY A 120      19.018  16.565  19.991  1.00 77.83           C  
ATOM    944  C   GLY A 120      20.426  16.354  19.469  1.00 77.83           C  
ATOM    945  O   GLY A 120      21.401  16.706  20.137  1.00 77.83           O  
ATOM    946  N   GLY A 121      20.623  16.100  18.066  1.00 80.23           N  
ATOM    947  CA  GLY A 121      21.887  15.770  17.427  1.00 80.23           C  
ATOM    948  C   GLY A 121      22.558  14.548  18.026  1.00 80.23           C  
ATOM    949  O   GLY A 121      22.663  13.508  17.372  1.00 80.23           O  
ATOM    950  N   GLN A 122      23.027  14.579  19.543  1.00 89.90           N  
ATOM    951  CA  GLN A 122      23.628  13.433  20.215  1.00 89.90           C  
ATOM    952  C   GLN A 122      22.585  12.651  21.009  1.00 89.90           C  
ATOM    953  CB  GLN A 122      24.761  13.885  21.139  1.00 89.90           C  
ATOM    954  O   GLN A 122      21.844  13.228  21.807  1.00 89.90           O  
ATOM    955  CG  GLN A 122      25.961  14.463  20.403  1.00 89.90           C  
ATOM    956  CD  GLN A 122      27.080  14.878  21.340  1.00 89.90           C  
ATOM    957  NE2 GLN A 122      28.286  15.014  20.799  1.00 89.90           N  
ATOM    958  OE1 GLN A 122      26.862  15.074  22.539  1.00 89.90           O  
ATOM    959  N   VAL A 123      22.587  11.376  20.767  1.00 95.07           N  
ATOM    960  CA  VAL A 123      21.578  10.530  21.394  1.00 95.07           C  
ATOM    961  C   VAL A 123      22.257   9.411  22.181  1.00 95.07           C  
ATOM    962  CB  VAL A 123      20.608   9.934  20.349  1.00 95.07           C  
ATOM    963  O   VAL A 123      23.185   8.769  21.684  1.00 95.07           O  
ATOM    964  CG1 VAL A 123      19.542   9.076  21.029  1.00 95.07           C  
ATOM    965  CG2 VAL A 123      19.959  11.047  19.529  1.00 95.07           C  
ATOM    966  N   ARG A 124      21.856   9.244  23.432  1.00 95.55           N  
ATOM    967  CA  ARG A 124      22.343   8.158  24.276  1.00 95.55           C  
ATOM    968  C   ARG A 124      21.219   7.189  24.626  1.00 95.55           C  
ATOM    969  CB  ARG A 124      22.974   8.712  25.556  1.00 95.55           C  
ATOM    970  O   ARG A 124      20.185   7.596  25.159  1.00 95.55           O  
ATOM    971  CG  ARG A 124      23.601   7.649  26.444  1.00 95.55           C  
ATOM    972  CD  ARG A 124      24.245   8.257  27.682  1.00 95.55           C  
ATOM    973  NE  ARG A 124      25.467   8.986  27.351  1.00 95.55           N  
ATOM    974  NH1 ARG A 124      25.984   9.525  29.537  1.00 95.55           N  
ATOM    975  NH2 ARG A 124      27.351  10.209  27.829  1.00 95.55           N  
ATOM    976  CZ  ARG A 124      26.264   9.572  28.240  1.00 95.55           C  
ATOM    977  N   VAL A 125      21.478   5.928  24.293  1.00 97.43           N  
ATOM    978  CA  VAL A 125      20.513   4.882  24.613  1.00 97.43           C  
ATOM    979  C   VAL A 125      21.081   3.969  25.698  1.00 97.43           C  
ATOM    980  CB  VAL A 125      20.139   4.054  23.363  1.00 97.43           C  
ATOM    981  O   VAL A 125      22.230   3.530  25.610  1.00 97.43           O  
ATOM    982  CG1 VAL A 125      19.051   3.034  23.697  1.00 97.43           C  
ATOM    983  CG2 VAL A 125      19.684   4.974  22.231  1.00 97.43           C  
ATOM    984  N   SER A 126      20.298   3.696  26.779  1.00 95.93           N  
ATOM    985  CA  SER A 126      20.769   2.817  27.845  1.00 95.93           C  
ATOM    986  C   SER A 126      19.726   1.760  28.192  1.00 95.93           C  
ATOM    987  CB  SER A 126      21.119   3.628  29.093  1.00 95.93           C  
ATOM    988  O   SER A 126      18.523   2.001  28.062  1.00 95.93           O  
ATOM    989  OG  SER A 126      20.000   4.374  29.539  1.00 95.93           O  
ATOM    990  N   LEU A 127      20.232   0.629  28.496  1.00 96.51           N  
ATOM    991  CA  LEU A 127      19.405  -0.502  28.902  1.00 96.51           C  
ATOM    992  C   LEU A 127      19.771  -0.966  30.308  1.00 96.51           C  
ATOM    993  CB  LEU A 127      19.559  -1.661  27.914  1.00 96.51           C  
ATOM    994  O   LEU A 127      20.942  -1.224  30.596  1.00 96.51           O  
ATOM    995  CG  LEU A 127      18.815  -2.952  28.261  1.00 96.51           C  
ATOM    996  CD1 LEU A 127      17.308  -2.726  28.210  1.00 96.51           C  
ATOM    997  CD2 LEU A 127      19.225  -4.076  27.316  1.00 96.51           C  
ATOM    998  N   SER A 128      18.778  -0.957  31.218  1.00 93.66           N  
ATOM    999  CA  SER A 128      19.022  -1.412  32.583  1.00 93.66           C  
ATOM   1000  C   SER A 128      17.869  -2.270  33.094  1.00 93.66           C  
ATOM   1001  CB  SER A 128      19.234  -0.219  33.516  1.00 93.66           C  
ATOM   1002  O   SER A 128      16.781  -2.266  32.515  1.00 93.66           O  
ATOM   1003  OG  SER A 128      18.072   0.591  33.569  1.00 93.66           O  
ATOM   1004  N   ARG A 129      18.162  -3.064  34.063  1.00 90.13           N  
ATOM   1005  CA  ARG A 129      17.169  -3.890  34.742  1.00 90.13           C  
ATOM   1006  C   ARG A 129      16.855  -3.342  36.130  1.00 90.13           C  
ATOM   1007  CB  ARG A 129      17.655  -5.338  34.847  1.00 90.13           C  
ATOM   1008  O   ARG A 129      17.766  -3.016  36.894  1.00 90.13           O  
ATOM   1009  CG  ARG A 129      16.577  -6.319  35.281  1.00 90.13           C  
ATOM   1010  CD  ARG A 129      17.084  -7.754  35.268  1.00 90.13           C  
ATOM   1011  NE  ARG A 129      16.066  -8.689  35.739  1.00 90.13           N  
ATOM   1012  NH1 ARG A 129      17.346 -10.581  35.390  1.00 90.13           N  
ATOM   1013  NH2 ARG A 129      15.223 -10.768  36.233  1.00 90.13           N  
ATOM   1014  CZ  ARG A 129      16.214 -10.011  35.786  1.00 90.13           C  
ATOM   1015  N   ASP A 130      15.605  -3.018  36.367  1.00 87.40           N  
ATOM   1016  CA  ASP A 130      15.126  -2.589  37.677  1.00 87.40           C  
ATOM   1017  C   ASP A 130      14.120  -3.585  38.248  1.00 87.40           C  
ATOM   1018  CB  ASP A 130      14.497  -1.197  37.590  1.00 87.40           C  
ATOM   1019  O   ASP A 130      12.937  -3.547  37.903  1.00 87.40           O  
ATOM   1020  CG  ASP A 130      14.103  -0.638  38.946  1.00 87.40           C  
ATOM   1021  OD1 ASP A 130      14.594  -1.141  39.979  1.00 87.40           O  
ATOM   1022  OD2 ASP A 130      13.291   0.312  38.981  1.00 87.40           O  
ATOM   1023  N   GLY A 131      14.599  -4.536  39.167  1.00 87.69           N  
ATOM   1024  CA  GLY A 131      13.732  -5.591  39.668  1.00 87.69           C  
ATOM   1025  C   GLY A 131      13.245  -6.530  38.581  1.00 87.69           C  
ATOM   1026  O   GLY A 131      14.049  -7.119  37.856  1.00 87.69           O  
ATOM   1027  N   ASP A 132      11.939  -6.588  38.442  1.00 86.48           N  
ATOM   1028  CA  ASP A 132      11.345  -7.486  37.456  1.00 86.48           C  
ATOM   1029  C   ASP A 132      11.010  -6.741  36.166  1.00 86.48           C  
ATOM   1030  CB  ASP A 132      10.088  -8.148  38.023  1.00 86.48           C  
ATOM   1031  O   ASP A 132      10.305  -7.269  35.303  1.00 86.48           O  
ATOM   1032  CG  ASP A 132      10.071  -8.188  39.541  1.00 86.48           C  
ATOM   1033  OD1 ASP A 132      11.112  -7.899  40.170  1.00 86.48           O  
ATOM   1034  OD2 ASP A 132       9.008  -8.513  40.113  1.00 86.48           O  
ATOM   1035  N   ARG A 133      11.527  -5.528  36.094  1.00 92.17           N  
ATOM   1036  CA  ARG A 133      11.204  -4.730  34.916  1.00 92.17           C  
ATOM   1037  C   ARG A 133      12.471  -4.296  34.185  1.00 92.17           C  
ATOM   1038  CB  ARG A 133      10.379  -3.502  35.307  1.00 92.17           C  
ATOM   1039  O   ARG A 133      13.528  -4.144  34.801  1.00 92.17           O  
ATOM   1040  CG  ARG A 133       9.059  -3.837  35.984  1.00 92.17           C  
ATOM   1041  CD  ARG A 133       8.221  -2.591  36.234  1.00 92.17           C  
ATOM   1042  NE  ARG A 133       6.916  -2.924  36.796  1.00 92.17           N  
ATOM   1043  NH1 ARG A 133       5.814  -2.941  34.766  1.00 92.17           N  
ATOM   1044  NH2 ARG A 133       4.668  -3.385  36.701  1.00 92.17           N  
ATOM   1045  CZ  ARG A 133       5.802  -3.082  36.086  1.00 92.17           C  
ATOM   1046  N   VAL A 134      12.313  -4.139  32.903  1.00 93.72           N  
ATOM   1047  CA  VAL A 134      13.407  -3.633  32.081  1.00 93.72           C  
ATOM   1048  C   VAL A 134      13.138  -2.179  31.701  1.00 93.72           C  
ATOM   1049  CB  VAL A 134      13.605  -4.489  30.810  1.00 93.72           C  
ATOM   1050  O   VAL A 134      12.001  -1.811  31.397  1.00 93.72           O  
ATOM   1051  CG1 VAL A 134      14.743  -3.933  29.956  1.00 93.72           C  
ATOM   1052  CG2 VAL A 134      13.877  -5.945  31.184  1.00 93.72           C  
ATOM   1053  N   VAL A 135      14.249  -1.413  31.806  1.00 95.56           N  
ATOM   1054  CA  VAL A 135      14.086   0.010  31.527  1.00 95.56           C  
ATOM   1055  C   VAL A 135      15.002   0.419  30.376  1.00 95.56           C  
ATOM   1056  CB  VAL A 135      14.381   0.871  32.775  1.00 95.56           C  
ATOM   1057  O   VAL A 135      16.215   0.203  30.434  1.00 95.56           O  
ATOM   1058  CG1 VAL A 135      14.176   2.353  32.469  1.00 95.56           C  
ATOM   1059  CG2 VAL A 135      13.497   0.436  33.943  1.00 95.56           C  
ATOM   1060  N   ILE A 136      14.390   0.921  29.343  1.00 97.11           N  
ATOM   1061  CA  ILE A 136      15.126   1.509  28.230  1.00 97.11           C  
ATOM   1062  C   ILE A 136      15.032   3.032  28.296  1.00 97.11           C  
ATOM   1063  CB  ILE A 136      14.598   0.999  26.870  1.00 97.11           C  
ATOM   1064  O   ILE A 136      13.934   3.591  28.350  1.00 97.11           O  
ATOM   1065  CG1 ILE A 136      14.619  -0.534  26.831  1.00 97.11           C  
ATOM   1066  CG2 ILE A 136      15.415   1.588  25.717  1.00 97.11           C  
ATOM   1067  CD1 ILE A 136      13.805  -1.135  25.693  1.00 97.11           C  
ATOM   1068  N   THR A 137      16.211   3.679  28.270  1.00 96.63           N  
ATOM   1069  CA  THR A 137      16.240   5.135  28.346  1.00 96.63           C  
ATOM   1070  C   THR A 137      16.897   5.729  27.103  1.00 96.63           C  
ATOM   1071  CB  THR A 137      16.988   5.615  29.603  1.00 96.63           C  
ATOM   1072  O   THR A 137      17.980   5.299  26.701  1.00 96.63           O  
ATOM   1073  CG2 THR A 137      16.928   7.133  29.734  1.00 96.63           C  
ATOM   1074  OG1 THR A 137      16.391   5.022  30.763  1.00 96.63           O  
ATOM   1075  N   VAL A 138      16.185   6.634  26.454  1.00 96.27           N  
ATOM   1076  CA  VAL A 138      16.721   7.387  25.324  1.00 96.27           C  
ATOM   1077  C   VAL A 138      16.841   8.863  25.696  1.00 96.27           C  
ATOM   1078  CB  VAL A 138      15.840   7.225  24.065  1.00 96.27           C  
ATOM   1079  O   VAL A 138      15.838   9.521  25.982  1.00 96.27           O  
ATOM   1080  CG1 VAL A 138      16.443   7.982  22.883  1.00 96.27           C  
ATOM   1081  CG2 VAL A 138      15.665   5.746  23.723  1.00 96.27           C  
ATOM   1082  N   GLU A 139      18.081   9.372  25.588  1.00 95.13           N  
ATOM   1083  CA  GLU A 139      18.350  10.757  25.960  1.00 95.13           C  
ATOM   1084  C   GLU A 139      18.942  11.538  24.790  1.00 95.13           C  
ATOM   1085  CB  GLU A 139      19.294  10.818  27.164  1.00 95.13           C  
ATOM   1086  O   GLU A 139      19.807  11.031  24.074  1.00 95.13           O  
ATOM   1087  CG  GLU A 139      18.706  10.224  28.436  1.00 95.13           C  
ATOM   1088  CD  GLU A 139      19.660  10.277  29.619  1.00 95.13           C  
ATOM   1089  OE1 GLU A 139      19.286  10.834  30.676  1.00 95.13           O  
ATOM   1090  OE2 GLU A 139      20.791   9.759  29.487  1.00 95.13           O  
ATOM   1091  N   ASP A 140      18.447  12.761  24.699  1.00 93.95           N  
ATOM   1092  CA  ASP A 140      19.009  13.626  23.665  1.00 93.95           C  
ATOM   1093  C   ASP A 140      19.403  14.984  24.240  1.00 93.95           C  
ATOM   1094  CB  ASP A 140      18.012  13.809  22.519  1.00 93.95           C  
ATOM   1095  O   ASP A 140      19.141  15.268  25.411  1.00 93.95           O  
ATOM   1096  CG  ASP A 140      16.783  14.604  22.923  1.00 93.95           C  
ATOM   1097  OD1 ASP A 140      16.775  15.842  22.754  1.00 93.95           O  
ATOM   1098  OD2 ASP A 140      15.815  13.986  23.417  1.00 93.95           O  
ATOM   1099  N   ASP A 141      20.154  15.731  23.416  1.00 90.17           N  
ATOM   1100  CA  ASP A 141      20.586  17.047  23.876  1.00 90.17           C  
ATOM   1101  C   ASP A 141      19.762  18.155  23.223  1.00 90.17           C  
ATOM   1102  CB  ASP A 141      22.073  17.256  23.584  1.00 90.17           C  
ATOM   1103  O   ASP A 141      20.254  19.268  23.027  1.00 90.17           O  
ATOM   1104  CG  ASP A 141      22.407  17.155  22.106  1.00 90.17           C  
ATOM   1105  OD1 ASP A 141      21.556  16.687  21.319  1.00 90.17           O  
ATOM   1106  OD2 ASP A 141      23.533  17.543  21.726  1.00 90.17           O  
ATOM   1107  N   GLY A 142      18.577  17.839  22.746  1.00 87.40           N  
ATOM   1108  CA  GLY A 142      17.732  18.839  22.115  1.00 87.40           C  
ATOM   1109  C   GLY A 142      17.077  19.781  23.108  1.00 87.40           C  
ATOM   1110  O   GLY A 142      17.470  19.830  24.276  1.00 87.40           O  
ATOM   1111  N   PRO A 143      16.111  20.679  22.705  1.00 86.04           N  
ATOM   1112  CA  PRO A 143      15.530  21.755  23.511  1.00 86.04           C  
ATOM   1113  C   PRO A 143      14.582  21.237  24.590  1.00 86.04           C  
ATOM   1114  CB  PRO A 143      14.776  22.599  22.481  1.00 86.04           C  
ATOM   1115  O   PRO A 143      14.261  21.963  25.535  1.00 86.04           O  
ATOM   1116  CG  PRO A 143      14.484  21.660  21.356  1.00 86.04           C  
ATOM   1117  CD  PRO A 143      15.597  20.655  21.274  1.00 86.04           C  
ATOM   1118  N   GLY A 144      14.286  19.917  24.524  1.00 86.00           N  
ATOM   1119  CA  GLY A 144      13.262  19.401  25.418  1.00 86.00           C  
ATOM   1120  C   GLY A 144      11.855  19.773  24.993  1.00 86.00           C  
ATOM   1121  O   GLY A 144      11.637  20.207  23.860  1.00 86.00           O  
ATOM   1122  N   ILE A 145      10.884  19.443  25.932  1.00 87.69           N  
ATOM   1123  CA  ILE A 145       9.470  19.696  25.673  1.00 87.69           C  
ATOM   1124  C   ILE A 145       8.878  20.524  26.810  1.00 87.69           C  
ATOM   1125  CB  ILE A 145       8.682  18.378  25.503  1.00 87.69           C  
ATOM   1126  O   ILE A 145       9.098  20.224  27.985  1.00 87.69           O  
ATOM   1127  CG1 ILE A 145       9.283  17.538  24.369  1.00 87.69           C  
ATOM   1128  CG2 ILE A 145       7.200  18.664  25.245  1.00 87.69           C  
ATOM   1129  CD1 ILE A 145       8.678  16.147  24.241  1.00 87.69           C  
ATOM   1130  N   PRO A 146       8.225  21.643  26.423  1.00 87.25           N  
ATOM   1131  CA  PRO A 146       7.535  22.384  27.482  1.00 87.25           C  
ATOM   1132  C   PRO A 146       6.681  21.483  28.371  1.00 87.25           C  
ATOM   1133  CB  PRO A 146       6.661  23.374  26.707  1.00 87.25           C  
ATOM   1134  O   PRO A 146       5.996  20.587  27.872  1.00 87.25           O  
ATOM   1135  CG  PRO A 146       7.316  23.496  25.369  1.00 87.25           C  
ATOM   1136  CD  PRO A 146       7.973  22.186  25.039  1.00 87.25           C  
ATOM   1137  N   PRO A 147       6.749  21.754  29.698  1.00 86.39           N  
ATOM   1138  CA  PRO A 147       6.097  20.875  30.671  1.00 86.39           C  
ATOM   1139  C   PRO A 147       4.610  20.677  30.384  1.00 86.39           C  
ATOM   1140  CB  PRO A 147       6.303  21.607  32.000  1.00 86.39           C  
ATOM   1141  O   PRO A 147       4.075  19.587  30.604  1.00 86.39           O  
ATOM   1142  CG  PRO A 147       7.528  22.439  31.792  1.00 86.39           C  
ATOM   1143  CD  PRO A 147       7.589  22.844  30.347  1.00 86.39           C  
ATOM   1144  N   ASP A 148       3.870  21.678  29.866  1.00 86.24           N  
ATOM   1145  CA  ASP A 148       2.439  21.566  29.601  1.00 86.24           C  
ATOM   1146  C   ASP A 148       2.176  20.727  28.352  1.00 86.24           C  
ATOM   1147  CB  ASP A 148       1.811  22.952  29.446  1.00 86.24           C  
ATOM   1148  O   ASP A 148       1.043  20.306  28.108  1.00 86.24           O  
ATOM   1149  CG  ASP A 148       2.528  23.816  28.423  1.00 86.24           C  
ATOM   1150  OD1 ASP A 148       3.777  23.859  28.429  1.00 86.24           O  
ATOM   1151  OD2 ASP A 148       1.837  24.463  27.607  1.00 86.24           O  
ATOM   1152  N   GLU A 149       3.254  20.323  27.647  1.00 86.72           N  
ATOM   1153  CA  GLU A 149       3.096  19.605  26.386  1.00 86.72           C  
ATOM   1154  C   GLU A 149       3.581  18.163  26.507  1.00 86.72           C  
ATOM   1155  CB  GLU A 149       3.849  20.321  25.261  1.00 86.72           C  
ATOM   1156  O   GLU A 149       3.421  17.369  25.577  1.00 86.72           O  
ATOM   1157  CG  GLU A 149       3.261  21.676  24.893  1.00 86.72           C  
ATOM   1158  CD  GLU A 149       3.842  22.253  23.612  1.00 86.72           C  
ATOM   1159  OE1 GLU A 149       3.576  23.437  23.305  1.00 86.72           O  
ATOM   1160  OE2 GLU A 149       4.568  21.515  22.909  1.00 86.72           O  
ATOM   1161  N   LEU A 150       4.123  17.760  27.649  1.00 87.96           N  
ATOM   1162  CA  LEU A 150       4.756  16.457  27.822  1.00 87.96           C  
ATOM   1163  C   LEU A 150       3.749  15.331  27.609  1.00 87.96           C  
ATOM   1164  CB  LEU A 150       5.377  16.344  29.217  1.00 87.96           C  
ATOM   1165  O   LEU A 150       4.064  14.324  26.971  1.00 87.96           O  
ATOM   1166  CG  LEU A 150       6.712  17.062  29.424  1.00 87.96           C  
ATOM   1167  CD1 LEU A 150       7.087  17.065  30.902  1.00 87.96           C  
ATOM   1168  CD2 LEU A 150       7.807  16.407  28.590  1.00 87.96           C  
ATOM   1169  N   GLU A 151       2.552  15.591  28.103  1.00 86.51           N  
ATOM   1170  CA  GLU A 151       1.539  14.555  27.924  1.00 86.51           C  
ATOM   1171  C   GLU A 151       0.882  14.658  26.551  1.00 86.51           C  
ATOM   1172  CB  GLU A 151       0.477  14.647  29.023  1.00 86.51           C  
ATOM   1173  O   GLU A 151       0.546  13.641  25.940  1.00 86.51           O  
ATOM   1174  CG  GLU A 151      -0.425  13.424  29.110  1.00 86.51           C  
ATOM   1175  CD  GLU A 151       0.331  12.143  29.425  1.00 86.51           C  
ATOM   1176  OE1 GLU A 151      -0.186  11.043  29.121  1.00 86.51           O  
ATOM   1177  OE2 GLU A 151       1.448  12.239  29.981  1.00 86.51           O  
ATOM   1178  N   ARG A 152       0.837  15.793  25.988  1.00 83.40           N  
ATOM   1179  CA  ARG A 152       0.136  16.062  24.736  1.00 83.40           C  
ATOM   1180  C   ARG A 152       0.905  15.500  23.546  1.00 83.40           C  
ATOM   1181  CB  ARG A 152      -0.084  17.565  24.555  1.00 83.40           C  
ATOM   1182  O   ARG A 152       0.315  15.191  22.509  1.00 83.40           O  
ATOM   1183  CG  ARG A 152      -1.141  18.149  25.479  1.00 83.40           C  
ATOM   1184  CD  ARG A 152      -1.337  19.640  25.241  1.00 83.40           C  
ATOM   1185  NE  ARG A 152      -1.941  19.902  23.938  1.00 83.40           N  
ATOM   1186  NH1 ARG A 152      -1.502  22.170  23.960  1.00 83.40           N  
ATOM   1187  NH2 ARG A 152      -2.578  21.224  22.171  1.00 83.40           N  
ATOM   1188  CZ  ARG A 152      -2.006  21.098  23.359  1.00 83.40           C  
ATOM   1189  N   VAL A 153       2.211  15.318  23.675  1.00 85.63           N  
ATOM   1190  CA  VAL A 153       3.054  14.878  22.568  1.00 85.63           C  
ATOM   1191  C   VAL A 153       2.719  13.432  22.207  1.00 85.63           C  
ATOM   1192  CB  VAL A 153       4.555  15.008  22.910  1.00 85.63           C  
ATOM   1193  O   VAL A 153       3.065  12.962  21.121  1.00 85.63           O  
ATOM   1194  CG1 VAL A 153       4.950  16.477  23.055  1.00 85.63           C  
ATOM   1195  CG2 VAL A 153       4.879  14.236  24.188  1.00 85.63           C  
ATOM   1196  N   PHE A 154       2.093  12.757  23.180  1.00 84.65           N  
ATOM   1197  CA  PHE A 154       1.697  11.382  22.898  1.00 84.65           C  
ATOM   1198  C   PHE A 154       0.414  11.345  22.077  1.00 84.65           C  
ATOM   1199  CB  PHE A 154       1.510  10.598  24.201  1.00 84.65           C  
ATOM   1200  O   PHE A 154       0.031  10.292  21.562  1.00 84.65           O  
ATOM   1201  CG  PHE A 154       2.802  10.245  24.888  1.00 84.65           C  
ATOM   1202  CD1 PHE A 154       3.653   9.288  24.349  1.00 84.65           C  
ATOM   1203  CD2 PHE A 154       3.164  10.870  26.074  1.00 84.65           C  
ATOM   1204  CE1 PHE A 154       4.849   8.959  24.983  1.00 84.65           C  
ATOM   1205  CE2 PHE A 154       4.358  10.546  26.713  1.00 84.65           C  
ATOM   1206  CZ  PHE A 154       5.198   9.590  26.167  1.00 84.65           C  
ATOM   1207  N   GLU A 155      -0.279  12.568  22.069  1.00 76.00           N  
ATOM   1208  CA  GLU A 155      -1.490  12.622  21.256  1.00 76.00           C  
ATOM   1209  C   GLU A 155      -1.160  12.543  19.768  1.00 76.00           C  
ATOM   1210  CB  GLU A 155      -2.280  13.900  21.552  1.00 76.00           C  
ATOM   1211  O   GLU A 155      -0.209  13.175  19.303  1.00 76.00           O  
ATOM   1212  CG  GLU A 155      -2.887  13.938  22.947  1.00 76.00           C  
ATOM   1213  CD  GLU A 155      -3.645  15.223  23.237  1.00 76.00           C  
ATOM   1214  OE1 GLU A 155      -4.121  15.403  24.381  1.00 76.00           O  
ATOM   1215  OE2 GLU A 155      -3.765  16.058  22.312  1.00 76.00           O  
ATOM   1216  N   PRO A 156      -1.870  11.672  19.032  1.00 67.36           N  
ATOM   1217  CA  PRO A 156      -1.611  11.550  17.596  1.00 67.36           C  
ATOM   1218  C   PRO A 156      -1.633  12.897  16.876  1.00 67.36           C  
ATOM   1219  CB  PRO A 156      -2.749  10.651  17.107  1.00 67.36           C  
ATOM   1220  O   PRO A 156      -2.478  13.745  17.171  1.00 67.36           O  
ATOM   1221  CG  PRO A 156      -3.268   9.987  18.342  1.00 67.36           C  
ATOM   1222  CD  PRO A 156      -3.004  10.887  19.515  1.00 67.36           C  
ATOM   1223  N   PHE A 157      -0.579  13.062  16.014  1.00 63.98           N  
ATOM   1224  CA  PHE A 157      -0.427  14.176  15.085  1.00 63.98           C  
ATOM   1225  C   PHE A 157      -0.148  15.472  15.835  1.00 63.98           C  
ATOM   1226  CB  PHE A 157      -1.682  14.330  14.219  1.00 63.98           C  
ATOM   1227  O   PHE A 157      -0.264  16.561  15.268  1.00 63.98           O  
ATOM   1228  CG  PHE A 157      -1.950  13.150  13.324  1.00 63.98           C  
ATOM   1229  CD1 PHE A 157      -1.184  12.936  12.185  1.00 63.98           C  
ATOM   1230  CD2 PHE A 157      -2.969  12.255  13.622  1.00 63.98           C  
ATOM   1231  CE1 PHE A 157      -1.430  11.845  11.355  1.00 63.98           C  
ATOM   1232  CE2 PHE A 157      -3.221  11.163  12.797  1.00 63.98           C  
ATOM   1233  CZ  PHE A 157      -2.451  10.960  11.664  1.00 63.98           C  
ATOM   1234  N   TYR A 158      -0.157  15.411  17.144  1.00 70.18           N  
ATOM   1235  CA  TYR A 158       0.247  16.608  17.873  1.00 70.18           C  
ATOM   1236  C   TYR A 158       1.724  16.910  17.650  1.00 70.18           C  
ATOM   1237  CB  TYR A 158      -0.033  16.446  19.370  1.00 70.18           C  
ATOM   1238  O   TYR A 158       2.580  16.048  17.867  1.00 70.18           O  
ATOM   1239  CG  TYR A 158       0.338  17.658  20.191  1.00 70.18           C  
ATOM   1240  CD1 TYR A 158       1.541  17.706  20.892  1.00 70.18           C  
ATOM   1241  CD2 TYR A 158      -0.513  18.754  20.267  1.00 70.18           C  
ATOM   1242  CE1 TYR A 158       1.885  18.820  21.652  1.00 70.18           C  
ATOM   1243  CE2 TYR A 158      -0.179  19.873  21.024  1.00 70.18           C  
ATOM   1244  OH  TYR A 158       1.357  21.001  22.461  1.00 70.18           O  
ATOM   1245  CZ  TYR A 158       1.021  19.896  21.711  1.00 70.18           C  
ATOM   1246  N   ARG A 159       1.888  18.283  17.100  1.00 66.62           N  
ATOM   1247  CA  ARG A 159       3.234  18.838  16.995  1.00 66.62           C  
ATOM   1248  C   ARG A 159       3.370  20.105  17.832  1.00 66.62           C  
ATOM   1249  CB  ARG A 159       3.580  19.135  15.534  1.00 66.62           C  
ATOM   1250  O   ARG A 159       2.475  20.953  17.836  1.00 66.62           O  
ATOM   1251  CG  ARG A 159       3.600  17.903  14.644  1.00 66.62           C  
ATOM   1252  CD  ARG A 159       3.916  18.258  13.197  1.00 66.62           C  
ATOM   1253  NE  ARG A 159       5.283  18.749  13.049  1.00 66.62           N  
ATOM   1254  NH1 ARG A 159       5.098  19.194  10.789  1.00 66.62           N  
ATOM   1255  NH2 ARG A 159       7.068  19.607  11.886  1.00 66.62           N  
ATOM   1256  CZ  ARG A 159       5.813  19.182  11.908  1.00 66.62           C  
ATOM   1257  N   GLY A 160       4.186  20.171  18.828  1.00 59.76           N  
ATOM   1258  CA  GLY A 160       4.413  21.387  19.593  1.00 59.76           C  
ATOM   1259  C   GLY A 160       4.702  22.595  18.722  1.00 59.76           C  
ATOM   1260  O   GLY A 160       4.921  22.459  17.516  1.00 59.76           O  
ATOM   1261  N   ASP A 161       4.260  23.859  19.096  1.00 53.06           N  
ATOM   1262  CA  ASP A 161       4.355  25.159  18.439  1.00 53.06           C  
ATOM   1263  C   ASP A 161       5.764  25.403  17.904  1.00 53.06           C  
ATOM   1264  CB  ASP A 161       3.959  26.278  19.404  1.00 53.06           C  
ATOM   1265  O   ASP A 161       5.934  25.953  16.814  1.00 53.06           O  
ATOM   1266  CG  ASP A 161       2.474  26.595  19.367  1.00 53.06           C  
ATOM   1267  OD1 ASP A 161       1.802  26.254  18.369  1.00 53.06           O  
ATOM   1268  OD2 ASP A 161       1.972  27.194  20.343  1.00 53.06           O  
ATOM   1269  N   SER A 162       6.890  24.850  18.608  1.00 49.52           N  
ATOM   1270  CA  SER A 162       8.256  25.137  18.181  1.00 49.52           C  
ATOM   1271  C   SER A 162       8.715  24.161  17.103  1.00 49.52           C  
ATOM   1272  CB  SER A 162       9.213  25.082  19.372  1.00 49.52           C  
ATOM   1273  O   SER A 162       9.669  24.438  16.373  1.00 49.52           O  
ATOM   1274  OG  SER A 162       8.497  24.933  20.586  1.00 49.52           O  
ATOM   1275  N   SER A 163       7.904  23.082  16.822  1.00 43.56           N  
ATOM   1276  CA  SER A 163       8.188  22.000  15.884  1.00 43.56           C  
ATOM   1277  C   SER A 163       7.480  22.223  14.552  1.00 43.56           C  
ATOM   1278  CB  SER A 163       7.766  20.654  16.476  1.00 43.56           C  
ATOM   1279  O   SER A 163       7.565  21.387  13.650  1.00 43.56           O  
ATOM   1280  OG  SER A 163       6.753  20.829  17.451  1.00 43.56           O  
ATOM   1281  N   ARG A 164       6.698  23.377  14.420  1.00 42.15           N  
ATOM   1282  CA  ARG A 164       6.100  23.612  13.109  1.00 42.15           C  
ATOM   1283  C   ARG A 164       7.153  24.052  12.098  1.00 42.15           C  
ATOM   1284  CB  ARG A 164       4.993  24.665  13.204  1.00 42.15           C  
ATOM   1285  O   ARG A 164       6.824  24.395  10.961  1.00 42.15           O  
ATOM   1286  CG  ARG A 164       3.667  24.120  13.710  1.00 42.15           C  
ATOM   1287  CD  ARG A 164       2.593  25.198  13.751  1.00 42.15           C  
ATOM   1288  NE  ARG A 164       1.333  24.683  14.279  1.00 42.15           N  
ATOM   1289  NH1 ARG A 164       0.201  26.690  14.103  1.00 42.15           N  
ATOM   1290  NH2 ARG A 164      -0.867  24.835  14.923  1.00 42.15           N  
ATOM   1291  CZ  ARG A 164       0.225  25.404  14.434  1.00 42.15           C  
ATOM   1292  N   ASN A 165       8.472  24.197  12.620  1.00 43.42           N  
ATOM   1293  CA  ASN A 165       9.469  24.530  11.607  1.00 43.42           C  
ATOM   1294  C   ASN A 165       9.626  23.407  10.586  1.00 43.42           C  
ATOM   1295  CB  ASN A 165      10.815  24.844  12.262  1.00 43.42           C  
ATOM   1296  O   ASN A 165       9.727  22.236  10.955  1.00 43.42           O  
ATOM   1297  CG  ASN A 165      11.048  26.333  12.433  1.00 43.42           C  
ATOM   1298  ND2 ASN A 165      12.129  26.689  13.117  1.00 43.42           N  
ATOM   1299  OD1 ASN A 165      10.262  27.155  11.956  1.00 43.42           O  
ATOM   1300  N   ARG A 166       8.774  23.252   9.644  1.00 47.93           N  
ATOM   1301  CA  ARG A 166       8.599  22.508   8.401  1.00 47.93           C  
ATOM   1302  C   ARG A 166       9.851  21.706   8.062  1.00 47.93           C  
ATOM   1303  CB  ARG A 166       8.257  23.456   7.250  1.00 47.93           C  
ATOM   1304  O   ARG A 166       9.770  20.667   7.404  1.00 47.93           O  
ATOM   1305  CG  ARG A 166       6.764  23.663   7.046  1.00 47.93           C  
ATOM   1306  CD  ARG A 166       6.479  24.602   5.882  1.00 47.93           C  
ATOM   1307  NE  ARG A 166       5.171  25.237   6.009  1.00 47.93           N  
ATOM   1308  NH1 ARG A 166       5.299  26.378   4.005  1.00 47.93           N  
ATOM   1309  NH2 ARG A 166       3.441  26.587   5.331  1.00 47.93           N  
ATOM   1310  CZ  ARG A 166       4.640  26.066   5.115  1.00 47.93           C  
ATOM   1311  N   ASP A 167      11.112  22.007   8.682  1.00 45.06           N  
ATOM   1312  CA  ASP A 167      12.293  21.276   8.235  1.00 45.06           C  
ATOM   1313  C   ASP A 167      12.536  20.042   9.102  1.00 45.06           C  
ATOM   1314  CB  ASP A 167      13.525  22.183   8.254  1.00 45.06           C  
ATOM   1315  O   ASP A 167      13.228  19.111   8.685  1.00 45.06           O  
ATOM   1316  CG  ASP A 167      13.633  23.064   7.022  1.00 45.06           C  
ATOM   1317  OD1 ASP A 167      13.019  22.737   5.983  1.00 45.06           O  
ATOM   1318  OD2 ASP A 167      14.340  24.093   7.090  1.00 45.06           O  
ATOM   1319  N   THR A 168      11.865  19.953  10.314  1.00 49.30           N  
ATOM   1320  CA  THR A 168      12.160  18.767  11.111  1.00 49.30           C  
ATOM   1321  C   THR A 168      11.047  17.732  10.973  1.00 49.30           C  
ATOM   1322  CB  THR A 168      12.350  19.125  12.596  1.00 49.30           C  
ATOM   1323  O   THR A 168      11.105  16.665  11.586  1.00 49.30           O  
ATOM   1324  CG2 THR A 168      13.564  20.028  12.794  1.00 49.30           C  
ATOM   1325  OG1 THR A 168      11.181  19.805  13.071  1.00 49.30           O  
ATOM   1326  N   GLY A 169      10.145  17.737   9.867  1.00 45.99           N  
ATOM   1327  CA  GLY A 169       9.238  16.872   9.129  1.00 45.99           C  
ATOM   1328  C   GLY A 169       8.796  15.656   9.922  1.00 45.99           C  
ATOM   1329  O   GLY A 169       8.836  14.532   9.417  1.00 45.99           O  
ATOM   1330  N   GLY A 170       8.260  15.725  11.157  1.00 57.76           N  
ATOM   1331  CA  GLY A 170       7.624  14.533  11.693  1.00 57.76           C  
ATOM   1332  C   GLY A 170       6.109  14.605  11.677  1.00 57.76           C  
ATOM   1333  O   GLY A 170       5.536  15.676  11.467  1.00 57.76           O  
ATOM   1334  N   THR A 171       5.354  13.419  11.453  1.00 60.71           N  
ATOM   1335  CA  THR A 171       3.910  13.265  11.319  1.00 60.71           C  
ATOM   1336  C   THR A 171       3.215  13.502  12.657  1.00 60.71           C  
ATOM   1337  CB  THR A 171       3.544  11.866  10.789  1.00 60.71           C  
ATOM   1338  O   THR A 171       2.032  13.848  12.695  1.00 60.71           O  
ATOM   1339  CG2 THR A 171       4.185  11.608   9.430  1.00 60.71           C  
ATOM   1340  OG1 THR A 171       4.003  10.875  11.717  1.00 60.71           O  
ATOM   1341  N   GLY A 172       4.003  13.569  13.829  1.00 68.94           N  
ATOM   1342  CA  GLY A 172       3.394  13.649  15.147  1.00 68.94           C  
ATOM   1343  C   GLY A 172       2.780  12.338  15.601  1.00 68.94           C  
ATOM   1344  O   GLY A 172       2.049  12.299  16.593  1.00 68.94           O  
ATOM   1345  N   LEU A 173       3.101  11.249  14.853  1.00 69.42           N  
ATOM   1346  CA  LEU A 173       2.522   9.961  15.218  1.00 69.42           C  
ATOM   1347  C   LEU A 173       3.541   9.096  15.953  1.00 69.42           C  
ATOM   1348  CB  LEU A 173       2.017   9.227  13.973  1.00 69.42           C  
ATOM   1349  O   LEU A 173       3.176   8.110  16.596  1.00 69.42           O  
ATOM   1350  CG  LEU A 173       0.628   9.623  13.470  1.00 69.42           C  
ATOM   1351  CD1 LEU A 173       0.442   9.179  12.023  1.00 69.42           C  
ATOM   1352  CD2 LEU A 173      -0.454   9.024  14.361  1.00 69.42           C  
ATOM   1353  N   GLY A 174       4.787   9.452  15.832  1.00 77.97           N  
ATOM   1354  CA  GLY A 174       5.871   8.608  16.308  1.00 77.97           C  
ATOM   1355  C   GLY A 174       5.709   8.188  17.756  1.00 77.97           C  
ATOM   1356  O   GLY A 174       5.629   6.995  18.056  1.00 77.97           O  
ATOM   1357  N   LEU A 175       5.525   9.164  18.701  1.00 86.39           N  
ATOM   1358  CA  LEU A 175       5.451   8.874  20.128  1.00 86.39           C  
ATOM   1359  C   LEU A 175       4.139   8.176  20.474  1.00 86.39           C  
ATOM   1360  CB  LEU A 175       5.588  10.161  20.945  1.00 86.39           C  
ATOM   1361  O   LEU A 175       4.086   7.372  21.407  1.00 86.39           O  
ATOM   1362  CG  LEU A 175       6.996  10.748  21.055  1.00 86.39           C  
ATOM   1363  CD1 LEU A 175       6.955  12.096  21.767  1.00 86.39           C  
ATOM   1364  CD2 LEU A 175       7.923   9.781  21.784  1.00 86.39           C  
ATOM   1365  N   ALA A 176       3.143   8.499  19.715  1.00 80.52           N  
ATOM   1366  CA  ALA A 176       1.872   7.806  19.909  1.00 80.52           C  
ATOM   1367  C   ALA A 176       2.012   6.314  19.620  1.00 80.52           C  
ATOM   1368  CB  ALA A 176       0.791   8.418  19.021  1.00 80.52           C  
ATOM   1369  O   ALA A 176       1.492   5.480  20.365  1.00 80.52           O  
ATOM   1370  N   ILE A 177       2.724   6.008  18.484  1.00 78.44           N  
ATOM   1371  CA  ILE A 177       2.965   4.625  18.087  1.00 78.44           C  
ATOM   1372  C   ILE A 177       3.807   3.923  19.150  1.00 78.44           C  
ATOM   1373  CB  ILE A 177       3.665   4.546  16.712  1.00 78.44           C  
ATOM   1374  O   ILE A 177       3.511   2.789  19.536  1.00 78.44           O  
ATOM   1375  CG1 ILE A 177       2.713   5.006  15.602  1.00 78.44           C  
ATOM   1376  CG2 ILE A 177       4.172   3.126  16.445  1.00 78.44           C  
ATOM   1377  CD1 ILE A 177       3.380   5.170  14.243  1.00 78.44           C  
ATOM   1378  N   VAL A 178       4.764   4.627  19.653  1.00 87.68           N  
ATOM   1379  CA  VAL A 178       5.656   4.078  20.668  1.00 87.68           C  
ATOM   1380  C   VAL A 178       4.859   3.725  21.922  1.00 87.68           C  
ATOM   1381  CB  VAL A 178       6.793   5.064  21.019  1.00 87.68           C  
ATOM   1382  O   VAL A 178       4.996   2.626  22.464  1.00 87.68           O  
ATOM   1383  CG1 VAL A 178       7.639   4.524  22.171  1.00 87.68           C  
ATOM   1384  CG2 VAL A 178       7.662   5.334  19.793  1.00 87.68           C  
ATOM   1385  N   ARG A 179       4.042   4.607  22.378  1.00 88.18           N  
ATOM   1386  CA  ARG A 179       3.239   4.379  23.575  1.00 88.18           C  
ATOM   1387  C   ARG A 179       2.308   3.186  23.391  1.00 88.18           C  
ATOM   1388  CB  ARG A 179       2.428   5.628  23.926  1.00 88.18           C  
ATOM   1389  O   ARG A 179       2.187   2.342  24.281  1.00 88.18           O  
ATOM   1390  CG  ARG A 179       1.685   5.528  25.249  1.00 88.18           C  
ATOM   1391  CD  ARG A 179       1.146   6.880  25.696  1.00 88.18           C  
ATOM   1392  NE  ARG A 179       0.090   7.359  24.809  1.00 88.18           N  
ATOM   1393  NH1 ARG A 179      -0.292   9.314  25.980  1.00 88.18           N  
ATOM   1394  NH2 ARG A 179      -1.512   8.844  24.097  1.00 88.18           N  
ATOM   1395  CZ  ARG A 179      -0.569   8.504  24.964  1.00 88.18           C  
ATOM   1396  N   SER A 180       1.734   3.175  22.294  1.00 80.03           N  
ATOM   1397  CA  SER A 180       0.817   2.079  21.996  1.00 80.03           C  
ATOM   1398  C   SER A 180       1.528   0.731  22.060  1.00 80.03           C  
ATOM   1399  CB  SER A 180       0.187   2.267  20.615  1.00 80.03           C  
ATOM   1400  O   SER A 180       1.017  -0.218  22.658  1.00 80.03           O  
ATOM   1401  OG  SER A 180      -0.633   1.160  20.282  1.00 80.03           O  
ATOM   1402  N   ILE A 181       2.750   0.646  21.435  1.00 84.60           N  
ATOM   1403  CA  ILE A 181       3.532  -0.584  21.375  1.00 84.60           C  
ATOM   1404  C   ILE A 181       3.975  -0.983  22.781  1.00 84.60           C  
ATOM   1405  CB  ILE A 181       4.760  -0.429  20.451  1.00 84.60           C  
ATOM   1406  O   ILE A 181       3.854  -2.148  23.170  1.00 84.60           O  
ATOM   1407  CG1 ILE A 181       4.317  -0.333  18.986  1.00 84.60           C  
ATOM   1408  CG2 ILE A 181       5.738  -1.590  20.652  1.00 84.60           C  
ATOM   1409  CD1 ILE A 181       5.443   0.012  18.020  1.00 84.60           C  
ATOM   1410  N   VAL A 182       4.393  -0.049  23.520  1.00 89.48           N  
ATOM   1411  CA  VAL A 182       4.904  -0.300  24.864  1.00 89.48           C  
ATOM   1412  C   VAL A 182       3.772  -0.789  25.765  1.00 89.48           C  
ATOM   1413  CB  VAL A 182       5.558   0.963  25.467  1.00 89.48           C  
ATOM   1414  O   VAL A 182       3.934  -1.765  26.500  1.00 89.48           O  
ATOM   1415  CG1 VAL A 182       5.893   0.746  26.942  1.00 89.48           C  
ATOM   1416  CG2 VAL A 182       6.812   1.342  24.682  1.00 89.48           C  
ATOM   1417  N   ARG A 183       2.646  -0.224  25.671  1.00 88.12           N  
ATOM   1418  CA  ARG A 183       1.498  -0.604  26.488  1.00 88.12           C  
ATOM   1419  C   ARG A 183       0.984  -1.986  26.101  1.00 88.12           C  
ATOM   1420  CB  ARG A 183       0.377   0.429  26.353  1.00 88.12           C  
ATOM   1421  O   ARG A 183       0.497  -2.734  26.952  1.00 88.12           O  
ATOM   1422  CG  ARG A 183       0.644   1.728  27.096  1.00 88.12           C  
ATOM   1423  CD  ARG A 183      -0.565   2.653  27.068  1.00 88.12           C  
ATOM   1424  NE  ARG A 183      -0.366   3.826  27.913  1.00 88.12           N  
ATOM   1425  NH1 ARG A 183      -2.338   4.861  27.296  1.00 88.12           N  
ATOM   1426  NH2 ARG A 183      -0.933   5.866  28.804  1.00 88.12           N  
ATOM   1427  CZ  ARG A 183      -1.213   4.848  28.002  1.00 88.12           C  
ATOM   1428  N   ALA A 184       1.072  -2.235  24.787  1.00 81.35           N  
ATOM   1429  CA  ALA A 184       0.658  -3.553  24.313  1.00 81.35           C  
ATOM   1430  C   ALA A 184       1.527  -4.651  24.920  1.00 81.35           C  
ATOM   1431  CB  ALA A 184       0.718  -3.613  22.789  1.00 81.35           C  
ATOM   1432  O   ALA A 184       1.107  -5.807  25.006  1.00 81.35           O  
ATOM   1433  N   HIS A 185       2.686  -4.313  25.306  1.00 88.48           N  
ATOM   1434  CA  HIS A 185       3.597  -5.251  25.952  1.00 88.48           C  
ATOM   1435  C   HIS A 185       3.419  -5.237  27.466  1.00 88.48           C  
ATOM   1436  CB  HIS A 185       5.047  -4.925  25.590  1.00 88.48           C  
ATOM   1437  O   HIS A 185       4.180  -5.882  28.191  1.00 88.48           O  
ATOM   1438  CG  HIS A 185       5.424  -5.329  24.200  1.00 88.48           C  
ATOM   1439  CD2 HIS A 185       6.082  -6.418  23.739  1.00 88.48           C  
ATOM   1440  ND1 HIS A 185       5.122  -4.563  23.095  1.00 88.48           N  
ATOM   1441  CE1 HIS A 185       5.578  -5.167  22.011  1.00 88.48           C  
ATOM   1442  NE2 HIS A 185       6.166  -6.294  22.374  1.00 88.48           N  
ATOM   1443  N   GLY A 186       2.430  -4.446  27.876  1.00 87.45           N  
ATOM   1444  CA  GLY A 186       2.178  -4.334  29.304  1.00 87.45           C  
ATOM   1445  C   GLY A 186       3.093  -3.341  29.995  1.00 87.45           C  
ATOM   1446  O   GLY A 186       3.243  -3.374  31.218  1.00 87.45           O  
ATOM   1447  N   GLY A 187       3.795  -2.576  29.243  1.00 91.88           N  
ATOM   1448  CA  GLY A 187       4.721  -1.592  29.782  1.00 91.88           C  
ATOM   1449  C   GLY A 187       4.151  -0.187  29.806  1.00 91.88           C  
ATOM   1450  O   GLY A 187       2.938  -0.001  29.688  1.00 91.88           O  
ATOM   1451  N   ASP A 188       5.156   0.774  30.112  1.00 94.38           N  
ATOM   1452  CA  ASP A 188       4.798   2.188  30.158  1.00 94.38           C  
ATOM   1453  C   ASP A 188       5.928   3.059  29.613  1.00 94.38           C  
ATOM   1454  CB  ASP A 188       4.452   2.609  31.587  1.00 94.38           C  
ATOM   1455  O   ASP A 188       7.082   2.627  29.563  1.00 94.38           O  
ATOM   1456  CG  ASP A 188       3.582   3.852  31.646  1.00 94.38           C  
ATOM   1457  OD1 ASP A 188       3.057   4.280  30.595  1.00 94.38           O  
ATOM   1458  OD2 ASP A 188       3.423   4.412  32.752  1.00 94.38           O  
ATOM   1459  N   ILE A 189       5.502   4.252  29.160  1.00 94.94           N  
ATOM   1460  CA  ILE A 189       6.479   5.201  28.639  1.00 94.94           C  
ATOM   1461  C   ILE A 189       6.300   6.554  29.324  1.00 94.94           C  
ATOM   1462  CB  ILE A 189       6.356   5.356  27.107  1.00 94.94           C  
ATOM   1463  O   ILE A 189       5.172   7.007  29.533  1.00 94.94           O  
ATOM   1464  CG1 ILE A 189       7.397   6.354  26.585  1.00 94.94           C  
ATOM   1465  CG2 ILE A 189       4.939   5.789  26.720  1.00 94.94           C  
ATOM   1466  CD1 ILE A 189       7.509   6.394  25.068  1.00 94.94           C  
ATOM   1467  N   THR A 190       7.442   7.215  29.690  1.00 94.69           N  
ATOM   1468  CA  THR A 190       7.406   8.528  30.324  1.00 94.69           C  
ATOM   1469  C   THR A 190       8.441   9.459  29.699  1.00 94.69           C  
ATOM   1470  CB  THR A 190       7.655   8.423  31.840  1.00 94.69           C  
ATOM   1471  O   THR A 190       9.499   9.010  29.254  1.00 94.69           O  
ATOM   1472  CG2 THR A 190       6.533   7.655  32.530  1.00 94.69           C  
ATOM   1473  OG1 THR A 190       8.896   7.743  32.069  1.00 94.69           O  
ATOM   1474  N   LEU A 191       8.071  10.761  29.681  1.00 94.57           N  
ATOM   1475  CA  LEU A 191       8.962  11.798  29.173  1.00 94.57           C  
ATOM   1476  C   LEU A 191       9.321  12.792  30.272  1.00 94.57           C  
ATOM   1477  CB  LEU A 191       8.314  12.532  27.996  1.00 94.57           C  
ATOM   1478  O   LEU A 191       8.463  13.181  31.068  1.00 94.57           O  
ATOM   1479  CG  LEU A 191       8.152  11.731  26.703  1.00 94.57           C  
ATOM   1480  CD1 LEU A 191       6.868  10.908  26.748  1.00 94.57           C  
ATOM   1481  CD2 LEU A 191       8.156  12.660  25.494  1.00 94.57           C  
ATOM   1482  N   GLU A 192      10.590  13.169  30.297  1.00 93.91           N  
ATOM   1483  CA  GLU A 192      11.046  14.212  31.212  1.00 93.91           C  
ATOM   1484  C   GLU A 192      12.163  15.043  30.589  1.00 93.91           C  
ATOM   1485  CB  GLU A 192      11.520  13.599  32.532  1.00 93.91           C  
ATOM   1486  O   GLU A 192      12.984  14.521  29.831  1.00 93.91           O  
ATOM   1487  CG  GLU A 192      12.745  12.708  32.392  1.00 93.91           C  
ATOM   1488  CD  GLU A 192      13.193  12.092  33.708  1.00 93.91           C  
ATOM   1489  OE1 GLU A 192      14.216  11.370  33.723  1.00 93.91           O  
ATOM   1490  OE2 GLU A 192      12.515  12.332  34.732  1.00 93.91           O  
ATOM   1491  N   ASN A 193      12.101  16.386  30.964  1.00 92.80           N  
ATOM   1492  CA  ASN A 193      13.206  17.232  30.526  1.00 92.80           C  
ATOM   1493  C   ASN A 193      14.439  17.042  31.404  1.00 92.80           C  
ATOM   1494  CB  ASN A 193      12.784  18.703  30.515  1.00 92.80           C  
ATOM   1495  O   ASN A 193      14.328  16.952  32.628  1.00 92.80           O  
ATOM   1496  CG  ASN A 193      11.843  19.032  29.373  1.00 92.80           C  
ATOM   1497  ND2 ASN A 193      10.829  19.841  29.655  1.00 92.80           N  
ATOM   1498  OD1 ASN A 193      12.025  18.561  28.247  1.00 92.80           O  
ATOM   1499  N   ARG A 194      15.633  17.100  30.765  1.00 90.35           N  
ATOM   1500  CA  ARG A 194      16.884  16.946  31.501  1.00 90.35           C  
ATOM   1501  C   ARG A 194      17.355  18.281  32.067  1.00 90.35           C  
ATOM   1502  CB  ARG A 194      17.967  16.347  30.601  1.00 90.35           C  
ATOM   1503  O   ARG A 194      17.116  19.333  31.471  1.00 90.35           O  
ATOM   1504  CG  ARG A 194      17.678  14.922  30.155  1.00 90.35           C  
ATOM   1505  CD  ARG A 194      18.776  14.382  29.250  1.00 90.35           C  
ATOM   1506  NE  ARG A 194      20.080  14.412  29.907  1.00 90.35           N  
ATOM   1507  NH1 ARG A 194      21.300  14.278  27.950  1.00 90.35           N  
ATOM   1508  NH2 ARG A 194      22.376  14.397  29.971  1.00 90.35           N  
ATOM   1509  CZ  ARG A 194      21.249  14.362  29.274  1.00 90.35           C  
ATOM   1510  N   PRO A 195      17.967  18.279  33.294  1.00 80.97           N  
ATOM   1511  CA  PRO A 195      18.466  19.507  33.919  1.00 80.97           C  
ATOM   1512  C   PRO A 195      19.489  20.236  33.052  1.00 80.97           C  
ATOM   1513  CB  PRO A 195      19.107  19.007  35.216  1.00 80.97           C  
ATOM   1514  O   PRO A 195      19.507  21.469  33.017  1.00 80.97           O  
ATOM   1515  CG  PRO A 195      18.622  17.601  35.365  1.00 80.97           C  
ATOM   1516  CD  PRO A 195      18.102  17.132  34.036  1.00 80.97           C  
ATOM   1517  N   GLY A 196      20.157  19.671  32.070  1.00 76.24           N  
ATOM   1518  CA  GLY A 196      21.238  20.204  31.256  1.00 76.24           C  
ATOM   1519  C   GLY A 196      20.830  20.465  29.819  1.00 76.24           C  
ATOM   1520  O   GLY A 196      21.647  20.902  29.006  1.00 76.24           O  
ATOM   1521  N   GLY A 197      19.487  20.389  29.636  1.00 83.77           N  
ATOM   1522  CA  GLY A 197      18.979  20.514  28.279  1.00 83.77           C  
ATOM   1523  C   GLY A 197      18.838  19.181  27.569  1.00 83.77           C  
ATOM   1524  O   GLY A 197      19.612  18.254  27.819  1.00 83.77           O  
ATOM   1525  N   GLY A 198      17.652  18.948  26.968  1.00 90.47           N  
ATOM   1526  CA  GLY A 198      17.317  17.745  26.222  1.00 90.47           C  
ATOM   1527  C   GLY A 198      16.098  17.025  26.766  1.00 90.47           C  
ATOM   1528  O   GLY A 198      15.397  17.550  27.634  1.00 90.47           O  
ATOM   1529  N   LEU A 199      15.868  15.896  26.210  1.00 93.98           N  
ATOM   1530  CA  LEU A 199      14.697  15.102  26.565  1.00 93.98           C  
ATOM   1531  C   LEU A 199      15.097  13.678  26.936  1.00 93.98           C  
ATOM   1532  CB  LEU A 199      13.694  15.078  25.408  1.00 93.98           C  
ATOM   1533  O   LEU A 199      15.959  13.082  26.286  1.00 93.98           O  
ATOM   1534  CG  LEU A 199      12.369  14.363  25.674  1.00 93.98           C  
ATOM   1535  CD1 LEU A 199      11.535  15.150  26.680  1.00 93.98           C  
ATOM   1536  CD2 LEU A 199      11.599  14.162  24.374  1.00 93.98           C  
ATOM   1537  N   ARG A 200      14.540  13.221  28.066  1.00 95.02           N  
ATOM   1538  CA  ARG A 200      14.712  11.832  28.479  1.00 95.02           C  
ATOM   1539  C   ARG A 200      13.406  11.056  28.347  1.00 95.02           C  
ATOM   1540  CB  ARG A 200      15.222  11.759  29.920  1.00 95.02           C  
ATOM   1541  O   ARG A 200      12.395  11.424  28.949  1.00 95.02           O  
ATOM   1542  CG  ARG A 200      15.435  10.342  30.427  1.00 95.02           C  
ATOM   1543  CD  ARG A 200      15.867  10.323  31.886  1.00 95.02           C  
ATOM   1544  NE  ARG A 200      17.179  10.939  32.068  1.00 95.02           N  
ATOM   1545  NH1 ARG A 200      16.702  11.832  34.144  1.00 95.02           N  
ATOM   1546  NH2 ARG A 200      18.764  12.157  33.197  1.00 95.02           N  
ATOM   1547  CZ  ARG A 200      17.545  11.641  33.136  1.00 95.02           C  
ATOM   1548  N   VAL A 201      13.562  10.033  27.517  1.00 96.01           N  
ATOM   1549  CA  VAL A 201      12.414   9.149  27.347  1.00 96.01           C  
ATOM   1550  C   VAL A 201      12.703   7.796  27.992  1.00 96.01           C  
ATOM   1551  CB  VAL A 201      12.057   8.963  25.855  1.00 96.01           C  
ATOM   1552  O   VAL A 201      13.714   7.159  27.687  1.00 96.01           O  
ATOM   1553  CG1 VAL A 201      10.779   8.139  25.704  1.00 96.01           C  
ATOM   1554  CG2 VAL A 201      11.905  10.319  25.170  1.00 96.01           C  
ATOM   1555  N   ARG A 202      11.704   7.333  28.851  1.00 96.30           N  
ATOM   1556  CA  ARG A 202      11.884   6.067  29.555  1.00 96.30           C  
ATOM   1557  C   ARG A 202      10.772   5.084  29.207  1.00 96.30           C  
ATOM   1558  CB  ARG A 202      11.928   6.294  31.068  1.00 96.30           C  
ATOM   1559  O   ARG A 202       9.589   5.394  29.367  1.00 96.30           O  
ATOM   1560  CG  ARG A 202      12.360   5.072  31.862  1.00 96.30           C  
ATOM   1561  CD  ARG A 202      12.414   5.360  33.356  1.00 96.30           C  
ATOM   1562  NE  ARG A 202      13.520   6.252  33.692  1.00 96.30           N  
ATOM   1563  NH1 ARG A 202      12.218   7.768  34.850  1.00 96.30           N  
ATOM   1564  NH2 ARG A 202      14.475   8.112  34.643  1.00 96.30           N  
ATOM   1565  CZ  ARG A 202      13.402   7.375  34.395  1.00 96.30           C  
ATOM   1566  N   ILE A 203      11.249   3.898  28.710  1.00 96.89           N  
ATOM   1567  CA  ILE A 203      10.332   2.791  28.458  1.00 96.89           C  
ATOM   1568  C   ILE A 203      10.529   1.707  29.516  1.00 96.89           C  
ATOM   1569  CB  ILE A 203      10.532   2.202  27.044  1.00 96.89           C  
ATOM   1570  O   ILE A 203      11.655   1.266  29.759  1.00 96.89           O  
ATOM   1571  CG1 ILE A 203      10.209   3.255  25.977  1.00 96.89           C  
ATOM   1572  CG2 ILE A 203       9.672   0.949  26.854  1.00 96.89           C  
ATOM   1573  CD1 ILE A 203      10.508   2.805  24.553  1.00 96.89           C  
ATOM   1574  N   THR A 204       9.343   1.295  30.070  1.00 94.98           N  
ATOM   1575  CA  THR A 204       9.399   0.195  31.027  1.00 94.98           C  
ATOM   1576  C   THR A 204       8.612  -1.008  30.514  1.00 94.98           C  
ATOM   1577  CB  THR A 204       8.852   0.622  32.401  1.00 94.98           C  
ATOM   1578  O   THR A 204       7.458  -0.872  30.103  1.00 94.98           O  
ATOM   1579  CG2 THR A 204       9.749   1.672  33.049  1.00 94.98           C  
ATOM   1580  OG1 THR A 204       7.537   1.168  32.237  1.00 94.98           O  
ATOM   1581  N   LEU A 205       9.313  -2.144  30.501  1.00 93.46           N  
ATOM   1582  CA  LEU A 205       8.678  -3.378  30.052  1.00 93.46           C  
ATOM   1583  C   LEU A 205       8.734  -4.445  31.140  1.00 93.46           C  
ATOM   1584  CB  LEU A 205       9.352  -3.896  28.779  1.00 93.46           C  
ATOM   1585  O   LEU A 205       9.704  -4.516  31.897  1.00 93.46           O  
ATOM   1586  CG  LEU A 205       9.269  -2.988  27.551  1.00 93.46           C  
ATOM   1587  CD1 LEU A 205      10.174  -3.513  26.441  1.00 93.46           C  
ATOM   1588  CD2 LEU A 205       7.828  -2.876  27.065  1.00 93.46           C  
ATOM   1589  N   PRO A 206       7.576  -5.290  31.257  1.00 85.83           N  
ATOM   1590  CA  PRO A 206       7.615  -6.395  32.217  1.00 85.83           C  
ATOM   1591  C   PRO A 206       8.660  -7.450  31.861  1.00 85.83           C  
ATOM   1592  CB  PRO A 206       6.202  -6.978  32.141  1.00 85.83           C  
ATOM   1593  O   PRO A 206       9.120  -7.507  30.718  1.00 85.83           O  
ATOM   1594  CG  PRO A 206       5.669  -6.518  30.823  1.00 85.83           C  
ATOM   1595  CD  PRO A 206       6.451  -5.311  30.387  1.00 85.83           C  
TER
ATOM   1596  N   ARG B   1     -10.528   1.642  27.700  1.00 45.26           N  
ATOM   1597  CA  ARG B   1      -9.633   2.782  27.532  1.00 45.26           C  
ATOM   1598  C   ARG B   1      -8.834   2.665  26.238  1.00 45.26           C  
ATOM   1599  CB  ARG B   1      -8.682   2.899  28.726  1.00 45.26           C  
ATOM   1600  O   ARG B   1      -8.651   3.653  25.524  1.00 45.26           O  
ATOM   1601  CG  ARG B   1      -9.232   3.733  29.872  1.00 45.26           C  
ATOM   1602  CD  ARG B   1      -8.172   4.006  30.930  1.00 45.26           C  
ATOM   1603  NE  ARG B   1      -8.348   3.153  32.102  1.00 45.26           N  
ATOM   1604  NH1 ARG B   1      -6.179   3.391  32.858  1.00 45.26           N  
ATOM   1605  NH2 ARG B   1      -7.666   2.092  34.021  1.00 45.26           N  
ATOM   1606  CZ  ARG B   1      -7.397   2.881  32.991  1.00 45.26           C  
ATOM   1607  N   GLN B   2      -8.348   1.474  25.827  1.00 48.28           N  
ATOM   1608  CA  GLN B   2      -7.624   1.183  24.594  1.00 48.28           C  
ATOM   1609  C   GLN B   2      -8.503   1.420  23.370  1.00 48.28           C  
ATOM   1610  CB  GLN B   2      -7.110  -0.258  24.600  1.00 48.28           C  
ATOM   1611  O   GLN B   2      -8.046   1.975  22.369  1.00 48.28           O  
ATOM   1612  CG  GLN B   2      -5.977  -0.511  23.614  1.00 48.28           C  
ATOM   1613  CD  GLN B   2      -5.451  -1.933  23.677  1.00 48.28           C  
ATOM   1614  NE2 GLN B   2      -4.503  -2.253  22.803  1.00 48.28           N  
ATOM   1615  OE1 GLN B   2      -5.893  -2.736  24.505  1.00 48.28           O  
ATOM   1616  N   VAL B   3      -9.816   1.040  23.426  1.00 53.50           N  
ATOM   1617  CA  VAL B   3     -10.727   1.207  22.298  1.00 53.50           C  
ATOM   1618  C   VAL B   3     -11.022   2.690  22.087  1.00 53.50           C  
ATOM   1619  CB  VAL B   3     -12.043   0.426  22.511  1.00 53.50           C  
ATOM   1620  O   VAL B   3     -11.048   3.169  20.951  1.00 53.50           O  
ATOM   1621  CG1 VAL B   3     -13.059   0.774  21.425  1.00 53.50           C  
ATOM   1622  CG2 VAL B   3     -11.773  -1.077  22.534  1.00 53.50           C  
ATOM   1623  N   GLU B   4     -11.257   3.397  23.227  1.00 54.21           N  
ATOM   1624  CA  GLU B   4     -11.537   4.827  23.147  1.00 54.21           C  
ATOM   1625  C   GLU B   4     -10.337   5.596  22.602  1.00 54.21           C  
ATOM   1626  CB  GLU B   4     -11.932   5.376  24.521  1.00 54.21           C  
ATOM   1627  O   GLU B   4     -10.495   6.514  21.794  1.00 54.21           O  
ATOM   1628  CG  GLU B   4     -13.377   5.090  24.905  1.00 54.21           C  
ATOM   1629  CD  GLU B   4     -13.730   5.564  26.306  1.00 54.21           C  
ATOM   1630  OE1 GLU B   4     -14.890   5.372  26.737  1.00 54.21           O  
ATOM   1631  OE2 GLU B   4     -12.841   6.133  26.977  1.00 54.21           O  
ATOM   1632  N   GLU B   5      -9.074   5.256  23.124  1.00 54.49           N  
ATOM   1633  CA  GLU B   5      -7.838   5.853  22.626  1.00 54.49           C  
ATOM   1634  C   GLU B   5      -7.651   5.573  21.138  1.00 54.49           C  
ATOM   1635  CB  GLU B   5      -6.634   5.334  23.415  1.00 54.49           C  
ATOM   1636  O   GLU B   5      -7.238   6.454  20.381  1.00 54.49           O  
ATOM   1637  CG  GLU B   5      -5.507   6.348  23.555  1.00 54.49           C  
ATOM   1638  CD  GLU B   5      -4.424   5.910  24.528  1.00 54.49           C  
ATOM   1639  OE1 GLU B   5      -3.425   6.646  24.696  1.00 54.49           O  
ATOM   1640  OE2 GLU B   5      -4.574   4.821  25.126  1.00 54.49           O  
ATOM   1641  N   ARG B   6      -8.071   4.428  20.687  1.00 58.37           N  
ATOM   1642  CA  ARG B   6      -7.976   4.022  19.288  1.00 58.37           C  
ATOM   1643  C   ARG B   6      -8.944   4.818  18.420  1.00 58.37           C  
ATOM   1644  CB  ARG B   6      -8.253   2.524  19.144  1.00 58.37           C  
ATOM   1645  O   ARG B   6      -8.587   5.254  17.323  1.00 58.37           O  
ATOM   1646  CG  ARG B   6      -7.015   1.652  19.284  1.00 58.37           C  
ATOM   1647  CD  ARG B   6      -7.323   0.187  19.009  1.00 58.37           C  
ATOM   1648  NE  ARG B   6      -6.147  -0.656  19.201  1.00 58.37           N  
ATOM   1649  NH1 ARG B   6      -7.340  -2.616  19.474  1.00 58.37           N  
ATOM   1650  NH2 ARG B   6      -5.050  -2.639  19.578  1.00 58.37           N  
ATOM   1651  CZ  ARG B   6      -6.181  -1.968  19.417  1.00 58.37           C  
ATOM   1652  N   THR B   7     -10.166   4.960  18.868  1.00 57.12           N  
ATOM   1653  CA  THR B   7     -11.181   5.719  18.145  1.00 57.12           C  
ATOM   1654  C   THR B   7     -10.762   7.179  17.999  1.00 57.12           C  
ATOM   1655  CB  THR B   7     -12.546   5.642  18.852  1.00 57.12           C  
ATOM   1656  O   THR B   7     -10.929   7.774  16.932  1.00 57.12           O  
ATOM   1657  CG2 THR B   7     -13.632   6.327  18.029  1.00 57.12           C  
ATOM   1658  OG1 THR B   7     -12.903   4.267  19.042  1.00 57.12           O  
ATOM   1659  N   ARG B   8     -10.292   7.769  19.146  1.00 59.24           N  
ATOM   1660  CA  ARG B   8      -9.840   9.156  19.128  1.00 59.24           C  
ATOM   1661  C   ARG B   8      -8.691   9.344  18.142  1.00 59.24           C  
ATOM   1662  CB  ARG B   8      -9.407   9.600  20.527  1.00 59.24           C  
ATOM   1663  O   ARG B   8      -8.631  10.353  17.436  1.00 59.24           O  
ATOM   1664  CG  ARG B   8     -10.172  10.803  21.055  1.00 59.24           C  
ATOM   1665  CD  ARG B   8      -9.610  11.290  22.383  1.00 59.24           C  
ATOM   1666  NE  ARG B   8     -10.360  10.754  23.516  1.00 59.24           N  
ATOM   1667  NH1 ARG B   8      -8.640  11.003  25.038  1.00 59.24           N  
ATOM   1668  NH2 ARG B   8     -10.651  10.129  25.706  1.00 59.24           N  
ATOM   1669  CZ  ARG B   8      -9.882  10.630  24.751  1.00 59.24           C  
ATOM   1670  N   MET B   9      -7.775   8.345  18.054  1.00 58.71           N  
ATOM   1671  CA  MET B   9      -6.647   8.370  17.128  1.00 58.71           C  
ATOM   1672  C   MET B   9      -7.128   8.316  15.682  1.00 58.71           C  
ATOM   1673  CB  MET B   9      -5.696   7.204  17.407  1.00 58.71           C  
ATOM   1674  O   MET B   9      -6.659   9.081  14.838  1.00 58.71           O  
ATOM   1675  CG  MET B   9      -4.276   7.442  16.919  1.00 58.71           C  
ATOM   1676  SD  MET B   9      -3.189   5.987  17.184  1.00 58.71           S  
ATOM   1677  CE  MET B   9      -1.565   6.797  17.183  1.00 58.71           C  
ATOM   1678  N   LEU B  10      -8.140   7.462  15.434  1.00 61.56           N  
ATOM   1679  CA  LEU B  10      -8.634   7.286  14.073  1.00 61.56           C  
ATOM   1680  C   LEU B  10      -9.321   8.553  13.575  1.00 61.56           C  
ATOM   1681  CB  LEU B  10      -9.604   6.104  14.003  1.00 61.56           C  
ATOM   1682  O   LEU B  10      -9.160   8.937  12.415  1.00 61.56           O  
ATOM   1683  CG  LEU B  10      -8.986   4.711  14.123  1.00 61.56           C  
ATOM   1684  CD1 LEU B  10     -10.077   3.658  14.284  1.00 61.56           C  
ATOM   1685  CD2 LEU B  10      -8.116   4.405  12.908  1.00 61.56           C  
ATOM   1686  N   ALA B  11     -10.017   9.285  14.482  1.00 62.71           N  
ATOM   1687  CA  ALA B  11     -10.693  10.527  14.117  1.00 62.71           C  
ATOM   1688  C   ALA B  11      -9.684  11.625  13.790  1.00 62.71           C  
ATOM   1689  CB  ALA B  11     -11.620  10.979  15.242  1.00 62.71           C  
ATOM   1690  O   ALA B  11      -9.875  12.389  12.841  1.00 62.71           O  
ATOM   1691  N   GLY B  12      -8.611  11.703  14.560  1.00 64.46           N  
ATOM   1692  CA  GLY B  12      -7.567  12.694  14.355  1.00 64.46           C  
ATOM   1693  C   GLY B  12      -6.820  12.512  13.047  1.00 64.46           C  
ATOM   1694  O   GLY B  12      -6.458  13.491  12.391  1.00 64.46           O  
ATOM   1695  N   VAL B  13      -6.687  11.271  12.561  1.00 67.08           N  
ATOM   1696  CA  VAL B  13      -5.954  10.924  11.347  1.00 67.08           C  
ATOM   1697  C   VAL B  13      -6.711  11.434  10.123  1.00 67.08           C  
ATOM   1698  CB  VAL B  13      -5.729   9.399  11.237  1.00 67.08           C  
ATOM   1699  O   VAL B  13      -6.106  11.965   9.188  1.00 67.08           O  
ATOM   1700  CG1 VAL B  13      -5.138   9.038   9.875  1.00 67.08           C  
ATOM   1701  CG2 VAL B  13      -4.819   8.913  12.364  1.00 67.08           C  
ATOM   1702  N   SER B  14      -8.079  11.281  10.207  1.00 68.07           N  
ATOM   1703  CA  SER B  14      -8.900  11.723   9.084  1.00 68.07           C  
ATOM   1704  C   SER B  14      -8.750  13.221   8.845  1.00 68.07           C  
ATOM   1705  CB  SER B  14     -10.371  11.382   9.329  1.00 68.07           C  
ATOM   1706  O   SER B  14      -8.555  13.657   7.709  1.00 68.07           O  
ATOM   1707  OG  SER B  14     -11.157  11.701   8.193  1.00 68.07           O  
ATOM   1708  N   HIS B  15      -8.888  14.006   9.885  1.00 70.06           N  
ATOM   1709  CA  HIS B  15      -8.780  15.454   9.751  1.00 70.06           C  
ATOM   1710  C   HIS B  15      -7.406  15.858   9.227  1.00 70.06           C  
ATOM   1711  CB  HIS B  15      -9.052  16.138  11.092  1.00 70.06           C  
ATOM   1712  O   HIS B  15      -7.300  16.717   8.349  1.00 70.06           O  
ATOM   1713  CG  HIS B  15      -9.008  17.631  11.024  1.00 70.06           C  
ATOM   1714  CD2 HIS B  15      -9.984  18.540  10.793  1.00 70.06           C  
ATOM   1715  ND1 HIS B  15      -7.845  18.350  11.203  1.00 70.06           N  
ATOM   1716  CE1 HIS B  15      -8.110  19.640  11.086  1.00 70.06           C  
ATOM   1717  NE2 HIS B  15      -9.401  19.783  10.837  1.00 70.06           N  
ATOM   1718  N   ASP B  16      -6.438  15.182   9.584  1.00 74.31           N  
ATOM   1719  CA  ASP B  16      -5.068  15.535   9.226  1.00 74.31           C  
ATOM   1720  C   ASP B  16      -4.752  15.121   7.790  1.00 74.31           C  
ATOM   1721  CB  ASP B  16      -4.076  14.885  10.192  1.00 74.31           C  
ATOM   1722  O   ASP B  16      -3.960  15.776   7.110  1.00 74.31           O  
ATOM   1723  CG  ASP B  16      -4.027  15.574  11.544  1.00 74.31           C  
ATOM   1724  OD1 ASP B  16      -4.629  16.658  11.699  1.00 74.31           O  
ATOM   1725  OD2 ASP B  16      -3.378  15.029  12.463  1.00 74.31           O  
ATOM   1726  N   LEU B  17      -5.318  13.923   7.356  1.00 78.72           N  
ATOM   1727  CA  LEU B  17      -5.141  13.511   5.968  1.00 78.72           C  
ATOM   1728  C   LEU B  17      -5.848  14.474   5.020  1.00 78.72           C  
ATOM   1729  CB  LEU B  17      -5.671  12.090   5.759  1.00 78.72           C  
ATOM   1730  O   LEU B  17      -5.394  14.688   3.894  1.00 78.72           O  
ATOM   1731  CG  LEU B  17      -4.769  10.952   6.240  1.00 78.72           C  
ATOM   1732  CD1 LEU B  17      -5.501   9.618   6.142  1.00 78.72           C  
ATOM   1733  CD2 LEU B  17      -3.475  10.918   5.434  1.00 78.72           C  
ATOM   1734  N   ARG B  18      -6.915  15.126   5.496  1.00 78.63           N  
ATOM   1735  CA  ARG B  18      -7.702  16.043   4.677  1.00 78.63           C  
ATOM   1736  C   ARG B  18      -6.919  17.315   4.371  1.00 78.63           C  
ATOM   1737  CB  ARG B  18      -9.018  16.393   5.375  1.00 78.63           C  
ATOM   1738  O   ARG B  18      -7.075  17.904   3.300  1.00 78.63           O  
ATOM   1739  CG  ARG B  18     -10.077  15.306   5.274  1.00 78.63           C  
ATOM   1740  CD  ARG B  18     -11.417  15.771   5.828  1.00 78.63           C  
ATOM   1741  NE  ARG B  18     -12.416  14.708   5.784  1.00 78.63           N  
ATOM   1742  NH1 ARG B  18     -13.917  15.778   7.177  1.00 78.63           N  
ATOM   1743  NH2 ARG B  18     -14.417  13.713   6.317  1.00 78.63           N  
ATOM   1744  CZ  ARG B  18     -13.581  14.735   6.426  1.00 78.63           C  
ATOM   1745  N   THR B  19      -6.109  17.713   5.236  1.00 82.40           N  
ATOM   1746  CA  THR B  19      -5.364  18.958   5.084  1.00 82.40           C  
ATOM   1747  C   THR B  19      -4.467  18.905   3.851  1.00 82.40           C  
ATOM   1748  CB  THR B  19      -4.510  19.253   6.331  1.00 82.40           C  
ATOM   1749  O   THR B  19      -4.547  19.774   2.980  1.00 82.40           O  
ATOM   1750  CG2 THR B  19      -3.773  20.581   6.191  1.00 82.40           C  
ATOM   1751  OG1 THR B  19      -5.361  19.311   7.483  1.00 82.40           O  
ATOM   1752  N   PRO B  20      -3.553  17.925   3.731  1.00 84.28           N  
ATOM   1753  CA  PRO B  20      -2.731  17.889   2.520  1.00 84.28           C  
ATOM   1754  C   PRO B  20      -3.556  17.670   1.253  1.00 84.28           C  
ATOM   1755  CB  PRO B  20      -1.788  16.709   2.768  1.00 84.28           C  
ATOM   1756  O   PRO B  20      -3.179  18.141   0.177  1.00 84.28           O  
ATOM   1757  CG  PRO B  20      -2.469  15.891   3.817  1.00 84.28           C  
ATOM   1758  CD  PRO B  20      -3.301  16.805   4.670  1.00 84.28           C  
ATOM   1759  N   LEU B  21      -4.639  16.934   1.322  1.00 87.64           N  
ATOM   1760  CA  LEU B  21      -5.519  16.714   0.179  1.00 87.64           C  
ATOM   1761  C   LEU B  21      -6.104  18.032  -0.317  1.00 87.64           C  
ATOM   1762  CB  LEU B  21      -6.648  15.749   0.549  1.00 87.64           C  
ATOM   1763  O   LEU B  21      -6.185  18.265  -1.525  1.00 87.64           O  
ATOM   1764  CG  LEU B  21      -6.293  14.261   0.553  1.00 87.64           C  
ATOM   1765  CD1 LEU B  21      -7.455  13.441   1.104  1.00 87.64           C  
ATOM   1766  CD2 LEU B  21      -5.922  13.795  -0.850  1.00 87.64           C  
ATOM   1767  N   THR B  22      -6.545  18.817   0.644  1.00 87.18           N  
ATOM   1768  CA  THR B  22      -7.116  20.117   0.312  1.00 87.18           C  
ATOM   1769  C   THR B  22      -6.075  21.011  -0.356  1.00 87.18           C  
ATOM   1770  CB  THR B  22      -7.672  20.820   1.564  1.00 87.18           C  
ATOM   1771  O   THR B  22      -6.373  21.692  -1.340  1.00 87.18           O  
ATOM   1772  CG2 THR B  22      -8.304  22.162   1.207  1.00 87.18           C  
ATOM   1773  OG1 THR B  22      -8.665  19.984   2.173  1.00 87.18           O  
ATOM   1774  N   ARG B  23      -4.850  20.972   0.158  1.00 89.52           N  
ATOM   1775  CA  ARG B  23      -3.775  21.754  -0.443  1.00 89.52           C  
ATOM   1776  C   ARG B  23      -3.482  21.282  -1.863  1.00 89.52           C  
ATOM   1777  CB  ARG B  23      -2.507  21.669   0.410  1.00 89.52           C  
ATOM   1778  O   ARG B  23      -3.284  22.098  -2.766  1.00 89.52           O  
ATOM   1779  CG  ARG B  23      -2.583  22.456   1.708  1.00 89.52           C  
ATOM   1780  CD  ARG B  23      -1.229  22.541   2.397  1.00 89.52           C  
ATOM   1781  NE  ARG B  23      -0.882  21.287   3.061  1.00 89.52           N  
ATOM   1782  NH1 ARG B  23       1.379  21.743   3.195  1.00 89.52           N  
ATOM   1783  NH2 ARG B  23       0.551  19.772   4.022  1.00 89.52           N  
ATOM   1784  CZ  ARG B  23       0.348  20.937   3.424  1.00 89.52           C  
ATOM   1785  N   LEU B  24      -3.413  19.949  -2.040  1.00 89.34           N  
ATOM   1786  CA  LEU B  24      -3.178  19.372  -3.359  1.00 89.34           C  
ATOM   1787  C   LEU B  24      -4.268  19.793  -4.339  1.00 89.34           C  
ATOM   1788  CB  LEU B  24      -3.115  17.845  -3.273  1.00 89.34           C  
ATOM   1789  O   LEU B  24      -3.979  20.128  -5.490  1.00 89.34           O  
ATOM   1790  CG  LEU B  24      -1.787  17.247  -2.805  1.00 89.34           C  
ATOM   1791  CD1 LEU B  24      -1.945  15.754  -2.534  1.00 89.34           C  
ATOM   1792  CD2 LEU B  24      -0.694  17.495  -3.840  1.00 89.34           C  
ATOM   1793  N   ARG B  25      -5.461  19.815  -3.831  1.00 90.15           N  
ATOM   1794  CA  ARG B  25      -6.601  20.206  -4.653  1.00 90.15           C  
ATOM   1795  C   ARG B  25      -6.468  21.650  -5.124  1.00 90.15           C  
ATOM   1796  CB  ARG B  25      -7.909  20.026  -3.878  1.00 90.15           C  
ATOM   1797  O   ARG B  25      -6.729  21.956  -6.289  1.00 90.15           O  
ATOM   1798  CG  ARG B  25      -9.157  20.256  -4.715  1.00 90.15           C  
ATOM   1799  CD  ARG B  25     -10.426  19.955  -3.930  1.00 90.15           C  
ATOM   1800  NE  ARG B  25     -10.780  18.540  -4.001  1.00 90.15           N  
ATOM   1801  NH1 ARG B  25     -13.051  18.884  -3.752  1.00 90.15           N  
ATOM   1802  NH2 ARG B  25     -12.228  16.758  -3.992  1.00 90.15           N  
ATOM   1803  CZ  ARG B  25     -12.019  18.064  -3.915  1.00 90.15           C  
ATOM   1804  N   LEU B  26      -6.154  22.498  -4.220  1.00 88.75           N  
ATOM   1805  CA  LEU B  26      -6.008  23.914  -4.539  1.00 88.75           C  
ATOM   1806  C   LEU B  26      -4.902  24.130  -5.566  1.00 88.75           C  
ATOM   1807  CB  LEU B  26      -5.708  24.721  -3.272  1.00 88.75           C  
ATOM   1808  O   LEU B  26      -5.054  24.934  -6.489  1.00 88.75           O  
ATOM   1809  CG  LEU B  26      -6.861  24.879  -2.280  1.00 88.75           C  
ATOM   1810  CD1 LEU B  26      -6.366  25.525  -0.990  1.00 88.75           C  
ATOM   1811  CD2 LEU B  26      -7.988  25.701  -2.897  1.00 88.75           C  
ATOM   1812  N   ARG B  27      -3.920  23.326  -5.543  1.00 87.95           N  
ATOM   1813  CA  ARG B  27      -2.777  23.493  -6.433  1.00 87.95           C  
ATOM   1814  C   ARG B  27      -3.080  22.945  -7.824  1.00 87.95           C  
ATOM   1815  CB  ARG B  27      -1.539  22.802  -5.856  1.00 87.95           C  
ATOM   1816  O   ARG B  27      -2.587  23.468  -8.825  1.00 87.95           O  
ATOM   1817  CG  ARG B  27      -0.935  23.519  -4.660  1.00 87.95           C  
ATOM   1818  CD  ARG B  27       0.363  22.865  -4.207  1.00 87.95           C  
ATOM   1819  NE  ARG B  27       0.901  23.507  -3.011  1.00 87.95           N  
ATOM   1820  NH1 ARG B  27       0.166  21.872  -1.553  1.00 87.95           N  
ATOM   1821  NH2 ARG B  27       1.322  23.686  -0.760  1.00 87.95           N  
ATOM   1822  CZ  ARG B  27       0.795  23.020  -1.777  1.00 87.95           C  
ATOM   1823  N   VAL B  28      -3.879  21.950  -7.779  1.00 87.87           N  
ATOM   1824  CA  VAL B  28      -4.222  21.305  -9.042  1.00 87.87           C  
ATOM   1825  C   VAL B  28      -5.152  22.208  -9.848  1.00 87.87           C  
ATOM   1826  CB  VAL B  28      -4.882  19.927  -8.814  1.00 87.87           C  
ATOM   1827  O   VAL B  28      -5.256  22.071 -11.070  1.00 87.87           O  
ATOM   1828  CG1 VAL B  28      -5.472  19.389 -10.117  1.00 87.87           C  
ATOM   1829  CG2 VAL B  28      -3.871  18.940  -8.234  1.00 87.87           C  
ATOM   1830  N   GLU B  29      -5.810  23.191  -9.224  1.00 85.15           N  
ATOM   1831  CA  GLU B  29      -6.795  24.071  -9.848  1.00 85.15           C  
ATOM   1832  C   GLU B  29      -6.154  24.938 -10.927  1.00 85.15           C  
ATOM   1833  CB  GLU B  29      -7.470  24.953  -8.795  1.00 85.15           C  
ATOM   1834  O   GLU B  29      -6.834  25.392 -11.850  1.00 85.15           O  
ATOM   1835  CG  GLU B  29      -8.527  24.231  -7.973  1.00 85.15           C  
ATOM   1836  CD  GLU B  29      -9.766  23.865  -8.775  1.00 85.15           C  
ATOM   1837  OE1 GLU B  29     -10.468  22.899  -8.401  1.00 85.15           O  
ATOM   1838  OE2 GLU B  29     -10.035  24.551  -9.787  1.00 85.15           O  
ATOM   1839  N   MET B  30      -4.901  25.071 -10.839  1.00 79.73           N  
ATOM   1840  CA  MET B  30      -4.183  25.950 -11.757  1.00 79.73           C  
ATOM   1841  C   MET B  30      -3.651  25.170 -12.954  1.00 79.73           C  
ATOM   1842  CB  MET B  30      -3.030  26.654 -11.038  1.00 79.73           C  
ATOM   1843  O   MET B  30      -3.026  25.744 -13.847  1.00 79.73           O  
ATOM   1844  CG  MET B  30      -3.479  27.562  -9.904  1.00 79.73           C  
ATOM   1845  SD  MET B  30      -2.115  28.606  -9.258  1.00 79.73           S  
ATOM   1846  CE  MET B  30      -2.291  30.061 -10.328  1.00 79.73           C  
ATOM   1847  N   MET B  31      -4.134  23.895 -13.206  1.00 82.12           N  
ATOM   1848  CA  MET B  31      -3.610  23.001 -14.234  1.00 82.12           C  
ATOM   1849  C   MET B  31      -4.518  22.989 -15.459  1.00 82.12           C  
ATOM   1850  CB  MET B  31      -3.453  21.582 -13.685  1.00 82.12           C  
ATOM   1851  O   MET B  31      -5.677  23.402 -15.382  1.00 82.12           O  
ATOM   1852  CG  MET B  31      -2.372  21.451 -12.624  1.00 82.12           C  
ATOM   1853  SD  MET B  31      -2.176  19.727 -12.029  1.00 82.12           S  
ATOM   1854  CE  MET B  31      -1.327  18.991 -13.455  1.00 82.12           C  
ATOM   1855  N   PRO B  32      -3.912  22.472 -16.592  1.00 82.09           N  
ATOM   1856  CA  PRO B  32      -4.799  22.244 -17.735  1.00 82.09           C  
ATOM   1857  C   PRO B  32      -5.942  21.284 -17.413  1.00 82.09           C  
ATOM   1858  CB  PRO B  32      -3.865  21.647 -18.792  1.00 82.09           C  
ATOM   1859  O   PRO B  32      -5.808  20.433 -16.531  1.00 82.09           O  
ATOM   1860  CG  PRO B  32      -2.488  21.986 -18.320  1.00 82.09           C  
ATOM   1861  CD  PRO B  32      -2.520  22.143 -16.827  1.00 82.09           C  
ATOM   1862  N   ASP B  33      -7.042  21.454 -18.176  1.00 84.16           N  
ATOM   1863  CA  ASP B  33      -8.335  20.860 -17.850  1.00 84.16           C  
ATOM   1864  C   ASP B  33      -8.240  19.337 -17.793  1.00 84.16           C  
ATOM   1865  CB  ASP B  33      -9.392  21.283 -18.872  1.00 84.16           C  
ATOM   1866  O   ASP B  33      -8.761  18.712 -16.866  1.00 84.16           O  
ATOM   1867  CG  ASP B  33      -9.895  22.699 -18.653  1.00 84.16           C  
ATOM   1868  OD1 ASP B  33      -9.694  23.254 -17.551  1.00 84.16           O  
ATOM   1869  OD2 ASP B  33     -10.500  23.264 -19.590  1.00 84.16           O  
ATOM   1870  N   ASP B  34      -7.444  18.811 -18.714  1.00 84.50           N  
ATOM   1871  CA  ASP B  34      -7.429  17.353 -18.771  1.00 84.50           C  
ATOM   1872  C   ASP B  34      -6.673  16.765 -17.581  1.00 84.50           C  
ATOM   1873  CB  ASP B  34      -6.802  16.873 -20.081  1.00 84.50           C  
ATOM   1874  O   ASP B  34      -7.165  15.849 -16.918  1.00 84.50           O  
ATOM   1875  CG  ASP B  34      -6.946  15.377 -20.295  1.00 84.50           C  
ATOM   1876  OD1 ASP B  34      -8.069  14.846 -20.157  1.00 84.50           O  
ATOM   1877  OD2 ASP B  34      -5.926  14.722 -20.601  1.00 84.50           O  
ATOM   1878  N   GLU B  35      -5.460  17.303 -17.230  1.00 83.74           N  
ATOM   1879  CA  GLU B  35      -4.655  16.827 -16.109  1.00 83.74           C  
ATOM   1880  C   GLU B  35      -5.315  17.163 -14.775  1.00 83.74           C  
ATOM   1881  CB  GLU B  35      -3.247  17.424 -16.166  1.00 83.74           C  
ATOM   1882  O   GLU B  35      -5.255  16.373 -13.830  1.00 83.74           O  
ATOM   1883  CG  GLU B  35      -2.390  16.874 -17.297  1.00 83.74           C  
ATOM   1884  CD  GLU B  35      -2.023  15.410 -17.113  1.00 83.74           C  
ATOM   1885  OE1 GLU B  35      -1.671  14.742 -18.112  1.00 83.74           O  
ATOM   1886  OE2 GLU B  35      -2.089  14.926 -15.961  1.00 83.74           O  
ATOM   1887  N   ARG B  36      -5.939  18.300 -14.806  1.00 87.00           N  
ATOM   1888  CA  ARG B  36      -6.647  18.745 -13.610  1.00 87.00           C  
ATOM   1889  C   ARG B  36      -7.760  17.772 -13.238  1.00 87.00           C  
ATOM   1890  CB  ARG B  36      -7.224  20.147 -13.817  1.00 87.00           C  
ATOM   1891  O   ARG B  36      -7.884  17.376 -12.077  1.00 87.00           O  
ATOM   1892  CG  ARG B  36      -7.927  20.711 -12.593  1.00 87.00           C  
ATOM   1893  CD  ARG B  36      -8.541  22.075 -12.874  1.00 87.00           C  
ATOM   1894  NE  ARG B  36      -9.657  21.981 -13.811  1.00 87.00           N  
ATOM   1895  NH1 ARG B  36      -8.815  23.543 -15.291  1.00 87.00           N  
ATOM   1896  NH2 ARG B  36     -10.820  22.516 -15.717  1.00 87.00           N  
ATOM   1897  CZ  ARG B  36      -9.761  22.680 -14.937  1.00 87.00           C  
ATOM   1898  N   ARG B  37      -8.550  17.381 -14.178  1.00 88.14           N  
ATOM   1899  CA  ARG B  37      -9.683  16.491 -13.946  1.00 88.14           C  
ATOM   1900  C   ARG B  37      -9.216  15.135 -13.426  1.00 88.14           C  
ATOM   1901  CB  ARG B  37     -10.496  16.308 -15.229  1.00 88.14           C  
ATOM   1902  O   ARG B  37      -9.824  14.570 -12.515  1.00 88.14           O  
ATOM   1903  CG  ARG B  37     -11.385  17.494 -15.568  1.00 88.14           C  
ATOM   1904  CD  ARG B  37     -12.263  17.213 -16.780  1.00 88.14           C  
ATOM   1905  NE  ARG B  37     -11.683  17.760 -18.004  1.00 88.14           N  
ATOM   1906  NH1 ARG B  37     -13.121  16.645 -19.428  1.00 88.14           N  
ATOM   1907  NH2 ARG B  37     -11.505  18.032 -20.277  1.00 88.14           N  
ATOM   1908  CZ  ARG B  37     -12.104  17.478 -19.233  1.00 88.14           C  
ATOM   1909  N   LYS B  38      -8.106  14.640 -13.972  1.00 88.46           N  
ATOM   1910  CA  LYS B  38      -7.574  13.339 -13.578  1.00 88.46           C  
ATOM   1911  C   LYS B  38      -7.011  13.382 -12.160  1.00 88.46           C  
ATOM   1912  CB  LYS B  38      -6.491  12.882 -14.557  1.00 88.46           C  
ATOM   1913  O   LYS B  38      -7.244  12.468 -11.366  1.00 88.46           O  
ATOM   1914  CG  LYS B  38      -7.019  12.522 -15.938  1.00 88.46           C  
ATOM   1915  CD  LYS B  38      -5.903  12.030 -16.852  1.00 88.46           C  
ATOM   1916  CE  LYS B  38      -6.427  11.684 -18.239  1.00 88.46           C  
ATOM   1917  NZ  LYS B  38      -5.328  11.253 -19.154  1.00 88.46           N  
ATOM   1918  N   MET B  39      -6.353  14.433 -11.823  1.00 88.99           N  
ATOM   1919  CA  MET B  39      -5.775  14.578 -10.490  1.00 88.99           C  
ATOM   1920  C   MET B  39      -6.866  14.774  -9.443  1.00 88.99           C  
ATOM   1921  CB  MET B  39      -4.797  15.753 -10.452  1.00 88.99           C  
ATOM   1922  O   MET B  39      -6.798  14.201  -8.354  1.00 88.99           O  
ATOM   1923  CG  MET B  39      -3.497  15.492 -11.196  1.00 88.99           C  
ATOM   1924  SD  MET B  39      -2.326  16.900 -11.079  1.00 88.99           S  
ATOM   1925  CE  MET B  39      -1.712  16.667  -9.388  1.00 88.99           C  
ATOM   1926  N   VAL B  40      -7.800  15.643  -9.823  1.00 88.20           N  
ATOM   1927  CA  VAL B  40      -8.917  15.870  -8.912  1.00 88.20           C  
ATOM   1928  C   VAL B  40      -9.652  14.556  -8.658  1.00 88.20           C  
ATOM   1929  CB  VAL B  40      -9.896  16.929  -9.467  1.00 88.20           C  
ATOM   1930  O   VAL B  40     -10.055  14.271  -7.528  1.00 88.20           O  
ATOM   1931  CG1 VAL B  40     -11.189  16.948  -8.655  1.00 88.20           C  
ATOM   1932  CG2 VAL B  40      -9.242  18.309  -9.469  1.00 88.20           C  
ATOM   1933  N   ARG B  41      -9.760  13.809  -9.648  1.00 87.04           N  
ATOM   1934  CA  ARG B  41     -10.384  12.497  -9.510  1.00 87.04           C  
ATOM   1935  C   ARG B  41      -9.598  11.615  -8.545  1.00 87.04           C  
ATOM   1936  CB  ARG B  41     -10.499  11.810 -10.873  1.00 87.04           C  
ATOM   1937  O   ARG B  41     -10.185  10.920  -7.713  1.00 87.04           O  
ATOM   1938  CG  ARG B  41     -11.655  12.315 -11.722  1.00 87.04           C  
ATOM   1939  CD  ARG B  41     -11.931  11.394 -12.902  1.00 87.04           C  
ATOM   1940  NE  ARG B  41     -10.798  11.341 -13.821  1.00 87.04           N  
ATOM   1941  NH1 ARG B  41     -12.026  11.905 -15.695  1.00 87.04           N  
ATOM   1942  NH2 ARG B  41      -9.775  11.508 -15.871  1.00 87.04           N  
ATOM   1943  CZ  ARG B  41     -10.869  11.585 -15.127  1.00 87.04           C  
ATOM   1944  N   ASP B  42      -8.269  11.534  -8.702  1.00 89.34           N  
ATOM   1945  CA  ASP B  42      -7.410  10.743  -7.826  1.00 89.34           C  
ATOM   1946  C   ASP B  42      -7.518  11.216  -6.378  1.00 89.34           C  
ATOM   1947  CB  ASP B  42      -5.956  10.812  -8.295  1.00 89.34           C  
ATOM   1948  O   ASP B  42      -7.572  10.400  -5.456  1.00 89.34           O  
ATOM   1949  CG  ASP B  42      -5.706  10.028  -9.572  1.00 89.34           C  
ATOM   1950  OD1 ASP B  42      -6.466   9.079  -9.863  1.00 89.34           O  
ATOM   1951  OD2 ASP B  42      -4.740  10.361 -10.291  1.00 89.34           O  
ATOM   1952  N   ILE B  43      -7.604  12.524  -6.221  1.00 89.40           N  
ATOM   1953  CA  ILE B  43      -7.743  13.113  -4.894  1.00 89.40           C  
ATOM   1954  C   ILE B  43      -9.089  12.715  -4.291  1.00 89.40           C  
ATOM   1955  CB  ILE B  43      -7.611  14.652  -4.942  1.00 89.40           C  
ATOM   1956  O   ILE B  43      -9.163  12.331  -3.122  1.00 89.40           O  
ATOM   1957  CG1 ILE B  43      -6.172  15.054  -5.284  1.00 89.40           C  
ATOM   1958  CG2 ILE B  43      -8.052  15.273  -3.613  1.00 89.40           C  
ATOM   1959  CD1 ILE B  43      -6.000  16.535  -5.594  1.00 89.40           C  
ATOM   1960  N   ASP B  44     -10.150  12.767  -5.046  1.00 85.35           N  
ATOM   1961  CA  ASP B  44     -11.485  12.383  -4.598  1.00 85.35           C  
ATOM   1962  C   ASP B  44     -11.530  10.907  -4.206  1.00 85.35           C  
ATOM   1963  CB  ASP B  44     -12.520  12.669  -5.689  1.00 85.35           C  
ATOM   1964  O   ASP B  44     -12.162  10.542  -3.213  1.00 85.35           O  
ATOM   1965  CG  ASP B  44     -12.810  14.150  -5.857  1.00 85.35           C  
ATOM   1966  OD1 ASP B  44     -12.517  14.937  -4.931  1.00 85.35           O  
ATOM   1967  OD2 ASP B  44     -13.339  14.532  -6.923  1.00 85.35           O  
ATOM   1968  N   GLU B  45     -10.865  10.151  -5.056  1.00 82.71           N  
ATOM   1969  CA  GLU B  45     -10.790   8.721  -4.772  1.00 82.71           C  
ATOM   1970  C   GLU B  45     -10.096   8.459  -3.438  1.00 82.71           C  
ATOM   1971  CB  GLU B  45     -10.058   7.987  -5.899  1.00 82.71           C  
ATOM   1972  O   GLU B  45     -10.566   7.647  -2.638  1.00 82.71           O  
ATOM   1973  CG  GLU B  45     -10.063   6.472  -5.750  1.00 82.71           C  
ATOM   1974  CD  GLU B  45      -9.386   5.754  -6.907  1.00 82.71           C  
ATOM   1975  OE1 GLU B  45      -9.294   4.506  -6.876  1.00 82.71           O  
ATOM   1976  OE2 GLU B  45      -8.943   6.445  -7.851  1.00 82.71           O  
ATOM   1977  N   MET B  46      -9.051   9.112  -3.197  1.00 85.68           N  
ATOM   1978  CA  MET B  46      -8.316   8.960  -1.944  1.00 85.68           C  
ATOM   1979  C   MET B  46      -9.179   9.368  -0.754  1.00 85.68           C  
ATOM   1980  CB  MET B  46      -7.032   9.792  -1.969  1.00 85.68           C  
ATOM   1981  O   MET B  46      -9.209   8.673   0.263  1.00 85.68           O  
ATOM   1982  CG  MET B  46      -5.918   9.175  -2.798  1.00 85.68           C  
ATOM   1983  SD  MET B  46      -4.321  10.057  -2.597  1.00 85.68           S  
ATOM   1984  CE  MET B  46      -4.804  11.721  -3.133  1.00 85.68           C  
ATOM   1985  N   GLU B  47      -9.913  10.443  -0.870  1.00 82.36           N  
ATOM   1986  CA  GLU B  47     -10.796  10.922   0.189  1.00 82.36           C  
ATOM   1987  C   GLU B  47     -11.878   9.896   0.513  1.00 82.36           C  
ATOM   1988  CB  GLU B  47     -11.437  12.255  -0.207  1.00 82.36           C  
ATOM   1989  O   GLU B  47     -12.154   9.625   1.683  1.00 82.36           O  
ATOM   1990  CG  GLU B  47     -10.515  13.454  -0.039  1.00 82.36           C  
ATOM   1991  CD  GLU B  47     -11.171  14.773  -0.418  1.00 82.36           C  
ATOM   1992  OE1 GLU B  47     -10.759  15.830   0.112  1.00 82.36           O  
ATOM   1993  OE2 GLU B  47     -12.104  14.748  -1.251  1.00 82.36           O  
ATOM   1994  N   ALA B  48     -12.389   9.389  -0.510  1.00 77.79           N  
ATOM   1995  CA  ALA B  48     -13.450   8.400  -0.335  1.00 77.79           C  
ATOM   1996  C   ALA B  48     -12.926   7.151   0.367  1.00 77.79           C  
ATOM   1997  CB  ALA B  48     -14.062   8.031  -1.684  1.00 77.79           C  
ATOM   1998  O   ALA B  48     -13.591   6.601   1.248  1.00 77.79           O  
ATOM   1999  N   MET B  49     -11.731   6.747  -0.027  1.00 76.21           N  
ATOM   2000  CA  MET B  49     -11.123   5.554   0.555  1.00 76.21           C  
ATOM   2001  C   MET B  49     -10.790   5.775   2.027  1.00 76.21           C  
ATOM   2002  CB  MET B  49      -9.859   5.163  -0.214  1.00 76.21           C  
ATOM   2003  O   MET B  49     -11.041   4.905   2.863  1.00 76.21           O  
ATOM   2004  CG  MET B  49     -10.137   4.442  -1.522  1.00 76.21           C  
ATOM   2005  SD  MET B  49      -8.614   3.758  -2.285  1.00 76.21           S  
ATOM   2006  CE  MET B  49      -8.096   5.176  -3.292  1.00 76.21           C  
ATOM   2007  N   ILE B  50     -10.250   6.888   2.321  1.00 77.45           N  
ATOM   2008  CA  ILE B  50      -9.881   7.236   3.689  1.00 77.45           C  
ATOM   2009  C   ILE B  50     -11.132   7.286   4.564  1.00 77.45           C  
ATOM   2010  CB  ILE B  50      -9.134   8.587   3.746  1.00 77.45           C  
ATOM   2011  O   ILE B  50     -11.148   6.734   5.667  1.00 77.45           O  
ATOM   2012  CG1 ILE B  50      -7.730   8.447   3.146  1.00 77.45           C  
ATOM   2013  CG2 ILE B  50      -9.065   9.106   5.185  1.00 77.45           C  
ATOM   2014  CD1 ILE B  50      -7.024   9.774   2.906  1.00 77.45           C  
ATOM   2015  N   ASP B  51     -12.199   7.891   4.041  1.00 75.08           N  
ATOM   2016  CA  ASP B  51     -13.464   7.966   4.765  1.00 75.08           C  
ATOM   2017  C   ASP B  51     -14.029   6.572   5.031  1.00 75.08           C  
ATOM   2018  CB  ASP B  51     -14.479   8.805   3.985  1.00 75.08           C  
ATOM   2019  O   ASP B  51     -14.499   6.288   6.134  1.00 75.08           O  
ATOM   2020  CG  ASP B  51     -14.190  10.294   4.048  1.00 75.08           C  
ATOM   2021  OD1 ASP B  51     -13.447  10.734   4.952  1.00 75.08           O  
ATOM   2022  OD2 ASP B  51     -14.713  11.036   3.188  1.00 75.08           O  
ATOM   2023  N   ALA B  52     -13.989   5.775   3.998  1.00 70.94           N  
ATOM   2024  CA  ALA B  52     -14.521   4.419   4.111  1.00 70.94           C  
ATOM   2025  C   ALA B  52     -13.728   3.602   5.126  1.00 70.94           C  
ATOM   2026  CB  ALA B  52     -14.509   3.728   2.750  1.00 70.94           C  
ATOM   2027  O   ALA B  52     -14.308   2.884   5.944  1.00 70.94           O  
ATOM   2028  N   PHE B  53     -12.457   3.729   5.050  1.00 70.50           N  
ATOM   2029  CA  PHE B  53     -11.579   2.992   5.951  1.00 70.50           C  
ATOM   2030  C   PHE B  53     -11.788   3.436   7.394  1.00 70.50           C  
ATOM   2031  CB  PHE B  53     -10.113   3.182   5.550  1.00 70.50           C  
ATOM   2032  O   PHE B  53     -11.858   2.605   8.301  1.00 70.50           O  
ATOM   2033  CG  PHE B  53      -9.143   2.437   6.427  1.00 70.50           C  
ATOM   2034  CD1 PHE B  53      -8.366   3.114   7.360  1.00 70.50           C  
ATOM   2035  CD2 PHE B  53      -9.007   1.059   6.319  1.00 70.50           C  
ATOM   2036  CE1 PHE B  53      -7.467   2.427   8.172  1.00 70.50           C  
ATOM   2037  CE2 PHE B  53      -8.111   0.366   7.127  1.00 70.50           C  
ATOM   2038  CZ  PHE B  53      -7.342   1.052   8.053  1.00 70.50           C  
ATOM   2039  N   LEU B  54     -11.762   4.759   7.678  1.00 69.85           N  
ATOM   2040  CA  LEU B  54     -11.960   5.293   9.021  1.00 69.85           C  
ATOM   2041  C   LEU B  54     -13.308   4.859   9.585  1.00 69.85           C  
ATOM   2042  CB  LEU B  54     -11.867   6.821   9.009  1.00 69.85           C  
ATOM   2043  O   LEU B  54     -13.425   4.583  10.782  1.00 69.85           O  
ATOM   2044  CG  LEU B  54     -10.466   7.414   8.847  1.00 69.85           C  
ATOM   2045  CD1 LEU B  54     -10.548   8.926   8.666  1.00 69.85           C  
ATOM   2046  CD2 LEU B  54      -9.594   7.060  10.047  1.00 69.85           C  
ATOM   2047  N   ALA B  55     -14.265   4.862   8.708  1.00 67.33           N  
ATOM   2048  CA  ALA B  55     -15.582   4.389   9.127  1.00 67.33           C  
ATOM   2049  C   ALA B  55     -15.518   2.943   9.609  1.00 67.33           C  
ATOM   2050  CB  ALA B  55     -16.585   4.522   7.983  1.00 67.33           C  
ATOM   2051  O   ALA B  55     -16.157   2.584  10.601  1.00 67.33           O  
ATOM   2052  N   PHE B  56     -14.773   2.273   8.983  1.00 63.66           N  
ATOM   2053  CA  PHE B  56     -14.580   0.871   9.334  1.00 63.66           C  
ATOM   2054  C   PHE B  56     -13.788   0.741  10.630  1.00 63.66           C  
ATOM   2055  CB  PHE B  56     -13.864   0.126   8.204  1.00 63.66           C  
ATOM   2056  O   PHE B  56     -14.135  -0.062  11.498  1.00 63.66           O  
ATOM   2057  CG  PHE B  56     -13.586  -1.321   8.510  1.00 63.66           C  
ATOM   2058  CD1 PHE B  56     -12.333  -1.724   8.954  1.00 63.66           C  
ATOM   2059  CD2 PHE B  56     -14.580  -2.279   8.354  1.00 63.66           C  
ATOM   2060  CE1 PHE B  56     -12.074  -3.063   9.239  1.00 63.66           C  
ATOM   2061  CE2 PHE B  56     -14.328  -3.618   8.637  1.00 63.66           C  
ATOM   2062  CZ  PHE B  56     -13.074  -4.008   9.078  1.00 63.66           C  
ATOM   2063  N   ALA B  57     -12.512   1.433  10.693  1.00 60.91           N  
ATOM   2064  CA  ALA B  57     -11.566   1.358  11.802  1.00 60.91           C  
ATOM   2065  C   ALA B  57     -12.201   1.849  13.100  1.00 60.91           C  
ATOM   2066  CB  ALA B  57     -10.312   2.171  11.488  1.00 60.91           C  
ATOM   2067  O   ALA B  57     -11.874   1.358  14.183  1.00 60.91           O  
ATOM   2068  N   ARG B  58     -12.921   3.006  13.146  1.00 61.63           N  
ATOM   2069  CA  ARG B  58     -13.588   3.561  14.320  1.00 61.63           C  
ATOM   2070  C   ARG B  58     -14.501   2.527  14.971  1.00 61.63           C  
ATOM   2071  CB  ARG B  58     -14.392   4.807  13.943  1.00 61.63           C  
ATOM   2072  O   ARG B  58     -14.705   2.549  16.186  1.00 61.63           O  
ATOM   2073  CG  ARG B  58     -13.581   6.092  13.961  1.00 61.63           C  
ATOM   2074  CD  ARG B  58     -14.455   7.315  13.719  1.00 61.63           C  
ATOM   2075  NE  ARG B  58     -13.749   8.339  12.955  1.00 61.63           N  
ATOM   2076  NH1 ARG B  58     -15.638   9.585  12.488  1.00 61.63           N  
ATOM   2077  NH2 ARG B  58     -13.590  10.266  11.715  1.00 61.63           N  
ATOM   2078  CZ  ARG B  58     -14.327   9.395  12.388  1.00 61.63           C  
ATOM   2079  N   GLY B  59     -14.337   1.313  14.493  1.00 54.73           N  
ATOM   2080  CA  GLY B  59     -15.123   0.274  15.139  1.00 54.73           C  
ATOM   2081  C   GLY B  59     -16.538   0.713  15.465  1.00 54.73           C  
ATOM   2082  O   GLY B  59     -16.827   1.911  15.511  1.00 54.73           O  
ATOM   2083  N   GLU B  60     -17.578  -0.089  15.310  1.00 52.69           N  
ATOM   2084  CA  GLU B  60     -19.028  -0.039  15.479  1.00 52.69           C  
ATOM   2085  C   GLU B  60     -19.411  -0.024  16.956  1.00 52.69           C  
ATOM   2086  CB  GLU B  60     -19.692  -1.224  14.774  1.00 52.69           C  
ATOM   2087  O   GLU B  60     -20.590   0.099  17.295  1.00 52.69           O  
ATOM   2088  CG  GLU B  60     -19.526  -1.213  13.262  1.00 52.69           C  
ATOM   2089  CD  GLU B  60     -20.097  -2.449  12.586  1.00 52.69           C  
ATOM   2090  OE1 GLU B  60     -19.953  -2.586  11.350  1.00 52.69           O  
ATOM   2091  OE2 GLU B  60     -20.694  -3.287  13.298  1.00 52.69           O  
ATOM   2092  N   ALA B  61     -18.339  -0.041  17.884  1.00 49.67           N  
ATOM   2093  CA  ALA B  61     -18.657  -0.205  19.300  1.00 49.67           C  
ATOM   2094  C   ALA B  61     -18.842   1.148  19.980  1.00 49.67           C  
ATOM   2095  CB  ALA B  61     -17.563  -1.005  20.002  1.00 49.67           C  
ATOM   2096  O   ALA B  61     -19.207   1.214  21.156  1.00 49.67           O  
ATOM   2097  N   ALA B  62     -18.872   2.200  19.152  1.00 56.74           N  
ATOM   2098  CA  ALA B  62     -19.004   3.371  20.015  1.00 56.74           C  
ATOM   2099  C   ALA B  62     -20.471   3.741  20.218  1.00 56.74           C  
ATOM   2100  CB  ALA B  62     -18.237   4.554  19.429  1.00 56.74           C  
ATOM   2101  O   ALA B  62     -20.816   4.429  21.181  1.00 56.74           O  
ATOM   2102  N   GLU B  63     -21.332   3.005  19.387  1.00 70.57           N  
ATOM   2103  CA  GLU B  63     -22.730   3.406  19.512  1.00 70.57           C  
ATOM   2104  C   GLU B  63     -23.535   2.366  20.286  1.00 70.57           C  
ATOM   2105  CB  GLU B  63     -23.350   3.632  18.131  1.00 70.57           C  
ATOM   2106  O   GLU B  63     -23.569   1.193  19.908  1.00 70.57           O  
ATOM   2107  CG  GLU B  63     -24.740   4.249  18.175  1.00 70.57           C  
ATOM   2108  CD  GLU B  63     -25.383   4.378  16.803  1.00 70.57           C  
ATOM   2109  OE1 GLU B  63     -26.488   4.958  16.702  1.00 70.57           O  
ATOM   2110  OE2 GLU B  63     -24.776   3.896  15.820  1.00 70.57           O  
ATOM   2111  N   PRO B  64     -24.149   2.770  21.418  1.00 78.41           N  
ATOM   2112  CA  PRO B  64     -24.968   1.787  22.130  1.00 78.41           C  
ATOM   2113  C   PRO B  64     -26.218   1.385  21.350  1.00 78.41           C  
ATOM   2114  CB  PRO B  64     -25.342   2.511  23.426  1.00 78.41           C  
ATOM   2115  O   PRO B  64     -26.783   2.202  20.619  1.00 78.41           O  
ATOM   2116  CG  PRO B  64     -25.174   3.963  23.114  1.00 78.41           C  
ATOM   2117  CD  PRO B  64     -24.197   4.098  21.982  1.00 78.41           C  
ATOM   2118  N   PRO B  65     -26.573   0.124  21.447  1.00 85.69           N  
ATOM   2119  CA  PRO B  65     -27.822  -0.306  20.814  1.00 85.69           C  
ATOM   2120  C   PRO B  65     -29.057   0.318  21.460  1.00 85.69           C  
ATOM   2121  CB  PRO B  65     -27.812  -1.824  21.011  1.00 85.69           C  
ATOM   2122  O   PRO B  65     -29.089   0.514  22.678  1.00 85.69           O  
ATOM   2123  CG  PRO B  65     -26.773  -2.067  22.057  1.00 85.69           C  
ATOM   2124  CD  PRO B  65     -25.932  -0.830  22.191  1.00 85.69           C  
ATOM   2125  N   GLU B  66     -29.976   0.866  20.598  1.00 92.62           N  
ATOM   2126  CA  GLU B  66     -31.254   1.406  21.052  1.00 92.62           C  
ATOM   2127  C   GLU B  66     -32.408   0.882  20.202  1.00 92.62           C  
ATOM   2128  CB  GLU B  66     -31.232   2.937  21.022  1.00 92.62           C  
ATOM   2129  O   GLU B  66     -32.190   0.339  19.117  1.00 92.62           O  
ATOM   2130  CG  GLU B  66     -30.966   3.521  19.642  1.00 92.62           C  
ATOM   2131  CD  GLU B  66     -30.833   5.036  19.648  1.00 92.62           C  
ATOM   2132  OE1 GLU B  66     -30.757   5.642  18.555  1.00 92.62           O  
ATOM   2133  OE2 GLU B  66     -30.804   5.620  20.754  1.00 92.62           O  
ATOM   2134  N   PRO B  67     -33.610   0.902  20.824  1.00 93.41           N  
ATOM   2135  CA  PRO B  67     -34.755   0.488  20.009  1.00 93.41           C  
ATOM   2136  C   PRO B  67     -34.912   1.326  18.742  1.00 93.41           C  
ATOM   2137  CB  PRO B  67     -35.947   0.689  20.948  1.00 93.41           C  
ATOM   2138  O   PRO B  67     -34.936   2.557  18.812  1.00 93.41           O  
ATOM   2139  CG  PRO B  67     -35.345   0.812  22.310  1.00 93.41           C  
ATOM   2140  CD  PRO B  67     -33.926   1.281  22.163  1.00 93.41           C  
ATOM   2141  N   VAL B  68     -34.876   0.699  17.551  1.00 93.63           N  
ATOM   2142  CA  VAL B  68     -34.955   1.386  16.266  1.00 93.63           C  
ATOM   2143  C   VAL B  68     -36.146   0.859  15.469  1.00 93.63           C  
ATOM   2144  CB  VAL B  68     -33.652   1.218  15.452  1.00 93.63           C  
ATOM   2145  O   VAL B  68     -36.321  -0.355  15.334  1.00 93.63           O  
ATOM   2146  CG1 VAL B  68     -33.787   1.869  14.076  1.00 93.63           C  
ATOM   2147  CG2 VAL B  68     -32.468   1.812  16.213  1.00 93.63           C  
ATOM   2148  N   ASP B  69     -36.994   1.758  15.016  1.00 94.19           N  
ATOM   2149  CA  ASP B  69     -38.046   1.429  14.059  1.00 94.19           C  
ATOM   2150  C   ASP B  69     -37.474   1.246  12.655  1.00 94.19           C  
ATOM   2151  CB  ASP B  69     -39.123   2.517  14.051  1.00 94.19           C  
ATOM   2152  O   ASP B  69     -37.175   2.225  11.968  1.00 94.19           O  
ATOM   2153  CG  ASP B  69     -40.298   2.181  13.150  1.00 94.19           C  
ATOM   2154  OD1 ASP B  69     -40.188   1.247  12.326  1.00 94.19           O  
ATOM   2155  OD2 ASP B  69     -41.343   2.857  13.263  1.00 94.19           O  
ATOM   2156  N   LEU B  70     -37.407   0.023  12.149  1.00 94.41           N  
ATOM   2157  CA  LEU B  70     -36.717  -0.279  10.900  1.00 94.41           C  
ATOM   2158  C   LEU B  70     -37.483   0.284   9.707  1.00 94.41           C  
ATOM   2159  CB  LEU B  70     -36.537  -1.790  10.739  1.00 94.41           C  
ATOM   2160  O   LEU B  70     -36.877   0.743   8.736  1.00 94.41           O  
ATOM   2161  CG  LEU B  70     -35.457  -2.441  11.605  1.00 94.41           C  
ATOM   2162  CD1 LEU B  70     -35.425  -3.947  11.370  1.00 94.41           C  
ATOM   2163  CD2 LEU B  70     -34.095  -1.820  11.317  1.00 94.41           C  
ATOM   2164  N   ALA B  71     -38.796   0.236   9.757  1.00 93.46           N  
ATOM   2165  CA  ALA B  71     -39.616   0.778   8.677  1.00 93.46           C  
ATOM   2166  C   ALA B  71     -39.363   2.272   8.494  1.00 93.46           C  
ATOM   2167  CB  ALA B  71     -41.096   0.523   8.952  1.00 93.46           C  
ATOM   2168  O   ALA B  71     -39.227   2.751   7.365  1.00 93.46           O  
ATOM   2169  N   ALA B  72     -39.308   2.968   9.642  1.00 93.80           N  
ATOM   2170  CA  ALA B  72     -39.052   4.406   9.610  1.00 93.80           C  
ATOM   2171  C   ALA B  72     -37.658   4.702   9.064  1.00 93.80           C  
ATOM   2172  CB  ALA B  72     -39.213   5.007  11.004  1.00 93.80           C  
ATOM   2173  O   ALA B  72     -37.480   5.627   8.268  1.00 93.80           O  
ATOM   2174  N   LEU B  73     -36.712   3.968   9.565  1.00 94.58           N  
ATOM   2175  CA  LEU B  73     -35.336   4.139   9.113  1.00 94.58           C  
ATOM   2176  C   LEU B  73     -35.223   3.898   7.612  1.00 94.58           C  
ATOM   2177  CB  LEU B  73     -34.402   3.187   9.866  1.00 94.58           C  
ATOM   2178  O   LEU B  73     -34.605   4.689   6.896  1.00 94.58           O  
ATOM   2179  CG  LEU B  73     -32.923   3.245   9.482  1.00 94.58           C  
ATOM   2180  CD1 LEU B  73     -32.361   4.638   9.744  1.00 94.58           C  
ATOM   2181  CD2 LEU B  73     -32.131   2.190  10.248  1.00 94.58           C  
ATOM   2182  N   LEU B  74     -35.797   2.821   7.046  1.00 95.85           N  
ATOM   2183  CA  LEU B  74     -35.769   2.492   5.625  1.00 95.85           C  
ATOM   2184  C   LEU B  74     -36.454   3.577   4.801  1.00 95.85           C  
ATOM   2185  CB  LEU B  74     -36.445   1.141   5.374  1.00 95.85           C  
ATOM   2186  O   LEU B  74     -35.976   3.939   3.724  1.00 95.85           O  
ATOM   2187  CG  LEU B  74     -35.624  -0.102   5.716  1.00 95.85           C  
ATOM   2188  CD1 LEU B  74     -36.519  -1.337   5.744  1.00 95.85           C  
ATOM   2189  CD2 LEU B  74     -34.486  -0.283   4.717  1.00 95.85           C  
ATOM   2190  N   GLU B  75     -37.558   4.055   5.338  1.00 94.76           N  
ATOM   2191  CA  GLU B  75     -38.276   5.125   4.652  1.00 94.76           C  
ATOM   2192  C   GLU B  75     -37.396   6.360   4.482  1.00 94.76           C  
ATOM   2193  CB  GLU B  75     -39.553   5.490   5.413  1.00 94.76           C  
ATOM   2194  O   GLU B  75     -37.382   6.976   3.415  1.00 94.76           O  
ATOM   2195  CG  GLU B  75     -40.523   6.347   4.612  1.00 94.76           C  
ATOM   2196  CD  GLU B  75     -41.863   6.543   5.304  1.00 94.76           C  
ATOM   2197  OE1 GLU B  75     -42.794   7.097   4.677  1.00 94.76           O  
ATOM   2198  OE2 GLU B  75     -41.982   6.140   6.482  1.00 94.76           O  
ATOM   2199  N   GLU B  76     -36.715   6.698   5.537  1.00 94.31           N  
ATOM   2200  CA  GLU B  76     -35.818   7.849   5.496  1.00 94.31           C  
ATOM   2201  C   GLU B  76     -34.726   7.661   4.447  1.00 94.31           C  
ATOM   2202  CB  GLU B  76     -35.191   8.090   6.872  1.00 94.31           C  
ATOM   2203  O   GLU B  76     -34.448   8.570   3.663  1.00 94.31           O  
ATOM   2204  CG  GLU B  76     -36.164   8.641   7.904  1.00 94.31           C  
ATOM   2205  CD  GLU B  76     -35.546   8.809   9.282  1.00 94.31           C  
ATOM   2206  OE1 GLU B  76     -36.299   8.950  10.273  1.00 94.31           O  
ATOM   2207  OE2 GLU B  76     -34.298   8.800   9.373  1.00 94.31           O  
ATOM   2208  N   VAL B  77     -34.098   6.504   4.480  1.00 95.06           N  
ATOM   2209  CA  VAL B  77     -32.995   6.225   3.567  1.00 95.06           C  
ATOM   2210  C   VAL B  77     -33.501   6.231   2.127  1.00 95.06           C  
ATOM   2211  CB  VAL B  77     -32.319   4.873   3.889  1.00 95.06           C  
ATOM   2212  O   VAL B  77     -32.869   6.814   1.242  1.00 95.06           O  
ATOM   2213  CG1 VAL B  77     -31.235   4.553   2.861  1.00 95.06           C  
ATOM   2214  CG2 VAL B  77     -31.734   4.892   5.300  1.00 95.06           C  
ATOM   2215  N   VAL B  78     -34.610   5.581   1.863  1.00 95.08           N  
ATOM   2216  CA  VAL B  78     -35.205   5.504   0.533  1.00 95.08           C  
ATOM   2217  C   VAL B  78     -35.585   6.903   0.054  1.00 95.08           C  
ATOM   2218  CB  VAL B  78     -36.445   4.581   0.518  1.00 95.08           C  
ATOM   2219  O   VAL B  78     -35.352   7.254  -1.105  1.00 95.08           O  
ATOM   2220  CG1 VAL B  78     -37.232   4.754  -0.779  1.00 95.08           C  
ATOM   2221  CG2 VAL B  78     -36.026   3.123   0.703  1.00 95.08           C  
ATOM   2222  N   ASP B  79     -36.147   7.717   0.910  1.00 93.84           N  
ATOM   2223  CA  ASP B  79     -36.532   9.084   0.573  1.00 93.84           C  
ATOM   2224  C   ASP B  79     -35.319   9.909   0.150  1.00 93.84           C  
ATOM   2225  CB  ASP B  79     -37.235   9.751   1.757  1.00 93.84           C  
ATOM   2226  O   ASP B  79     -35.406  10.724  -0.770  1.00 93.84           O  
ATOM   2227  CG  ASP B  79     -38.671   9.289   1.932  1.00 93.84           C  
ATOM   2228  OD1 ASP B  79     -39.211   8.621   1.024  1.00 93.84           O  
ATOM   2229  OD2 ASP B  79     -39.268   9.598   2.986  1.00 93.84           O  
ATOM   2230  N   ASP B  80     -34.178   9.701   0.847  1.00 92.93           N  
ATOM   2231  CA  ASP B  80     -32.946  10.404   0.502  1.00 92.93           C  
ATOM   2232  C   ASP B  80     -32.534  10.117  -0.940  1.00 92.93           C  
ATOM   2233  CB  ASP B  80     -31.818  10.011   1.459  1.00 92.93           C  
ATOM   2234  O   ASP B  80     -32.150  11.029  -1.675  1.00 92.93           O  
ATOM   2235  CG  ASP B  80     -31.982  10.609   2.846  1.00 92.93           C  
ATOM   2236  OD1 ASP B  80     -32.821  11.518   3.023  1.00 92.93           O  
ATOM   2237  OD2 ASP B  80     -31.262  10.168   3.768  1.00 92.93           O  
ATOM   2238  N   PHE B  81     -32.670   8.917  -1.327  1.00 93.24           N  
ATOM   2239  CA  PHE B  81     -32.261   8.540  -2.675  1.00 93.24           C  
ATOM   2240  C   PHE B  81     -33.299   8.981  -3.699  1.00 93.24           C  
ATOM   2241  CB  PHE B  81     -32.040   7.027  -2.768  1.00 93.24           C  
ATOM   2242  O   PHE B  81     -32.950   9.388  -4.809  1.00 93.24           O  
ATOM   2243  CG  PHE B  81     -30.685   6.581  -2.292  1.00 93.24           C  
ATOM   2244  CD1 PHE B  81     -29.607   6.527  -3.168  1.00 93.24           C  
ATOM   2245  CD2 PHE B  81     -30.487   6.215  -0.967  1.00 93.24           C  
ATOM   2246  CE1 PHE B  81     -28.351   6.114  -2.729  1.00 93.24           C  
ATOM   2247  CE2 PHE B  81     -29.235   5.801  -0.521  1.00 93.24           C  
ATOM   2248  CZ  PHE B  81     -28.169   5.750  -1.404  1.00 93.24           C  
ATOM   2249  N   ALA B  82     -34.514   8.863  -3.321  1.00 91.22           N  
ATOM   2250  CA  ALA B  82     -35.576   9.347  -4.199  1.00 91.22           C  
ATOM   2251  C   ALA B  82     -35.421  10.839  -4.478  1.00 91.22           C  
ATOM   2252  CB  ALA B  82     -36.945   9.064  -3.584  1.00 91.22           C  
ATOM   2253  O   ALA B  82     -35.608  11.288  -5.611  1.00 91.22           O  
ATOM   2254  N   ASP B  83     -35.058  11.632  -3.482  1.00 92.06           N  
ATOM   2255  CA  ASP B  83     -34.849  13.071  -3.607  1.00 92.06           C  
ATOM   2256  C   ASP B  83     -33.704  13.379  -4.568  1.00 92.06           C  
ATOM   2257  CB  ASP B  83     -34.568  13.693  -2.237  1.00 92.06           C  
ATOM   2258  O   ASP B  83     -33.668  14.451  -5.177  1.00 92.06           O  
ATOM   2259  CG  ASP B  83     -35.799  13.753  -1.349  1.00 92.06           C  
ATOM   2260  OD1 ASP B  83     -36.929  13.602  -1.862  1.00 92.06           O  
ATOM   2261  OD2 ASP B  83     -35.637  13.956  -0.127  1.00 92.06           O  
ATOM   2262  N   MET B  84     -32.836  12.454  -4.748  1.00 88.04           N  
ATOM   2263  CA  MET B  84     -31.695  12.619  -5.644  1.00 88.04           C  
ATOM   2264  C   MET B  84     -32.037  12.143  -7.052  1.00 88.04           C  
ATOM   2265  CB  MET B  84     -30.480  11.855  -5.114  1.00 88.04           C  
ATOM   2266  O   MET B  84     -31.167  12.097  -7.924  1.00 88.04           O  
ATOM   2267  CG  MET B  84     -29.888  12.449  -3.847  1.00 88.04           C  
ATOM   2268  SD  MET B  84     -28.417  11.524  -3.257  1.00 88.04           S  
ATOM   2269  CE  MET B  84     -28.343  12.101  -1.539  1.00 88.04           C  
ATOM   2270  N   GLY B  85     -33.239  11.719  -7.222  1.00 89.17           N  
ATOM   2271  CA  GLY B  85     -33.707  11.338  -8.546  1.00 89.17           C  
ATOM   2272  C   GLY B  85     -33.623   9.845  -8.801  1.00 89.17           C  
ATOM   2273  O   GLY B  85     -33.835   9.389  -9.926  1.00 89.17           O  
ATOM   2274  N   ALA B  86     -33.259   9.082  -7.800  1.00 91.34           N  
ATOM   2275  CA  ALA B  86     -33.143   7.637  -7.975  1.00 91.34           C  
ATOM   2276  C   ALA B  86     -34.509   6.962  -7.892  1.00 91.34           C  
ATOM   2277  CB  ALA B  86     -32.199   7.049  -6.929  1.00 91.34           C  
ATOM   2278  O   ALA B  86     -35.407   7.446  -7.199  1.00 91.34           O  
ATOM   2279  N   GLU B  87     -34.738   5.940  -8.714  1.00 92.12           N  
ATOM   2280  CA  GLU B  87     -35.970   5.157  -8.687  1.00 92.12           C  
ATOM   2281  C   GLU B  87     -35.899   4.053  -7.637  1.00 92.12           C  
ATOM   2282  CB  GLU B  87     -36.255   4.555 -10.065  1.00 92.12           C  
ATOM   2283  O   GLU B  87     -35.510   2.923  -7.941  1.00 92.12           O  
ATOM   2284  CG  GLU B  87     -36.800   5.557 -11.073  1.00 92.12           C  
ATOM   2285  CD  GLU B  87     -37.226   4.917 -12.385  1.00 92.12           C  
ATOM   2286  OE1 GLU B  87     -37.691   5.644 -13.292  1.00 92.12           O  
ATOM   2287  OE2 GLU B  87     -37.095   3.678 -12.506  1.00 92.12           O  
ATOM   2288  N   VAL B  88     -36.349   4.386  -6.385  1.00 95.09           N  
ATOM   2289  CA  VAL B  88     -36.295   3.438  -5.276  1.00 95.09           C  
ATOM   2290  C   VAL B  88     -37.664   3.352  -4.604  1.00 95.09           C  
ATOM   2291  CB  VAL B  88     -35.217   3.835  -4.243  1.00 95.09           C  
ATOM   2292  O   VAL B  88     -38.270   4.376  -4.282  1.00 95.09           O  
ATOM   2293  CG1 VAL B  88     -35.024   2.725  -3.211  1.00 95.09           C  
ATOM   2294  CG2 VAL B  88     -33.898   4.153  -4.944  1.00 95.09           C  
ATOM   2295  N   THR B  89     -38.177   2.129  -4.457  1.00 94.50           N  
ATOM   2296  CA  THR B  89     -39.467   1.925  -3.807  1.00 94.50           C  
ATOM   2297  C   THR B  89     -39.306   1.104  -2.531  1.00 94.50           C  
ATOM   2298  CB  THR B  89     -40.463   1.223  -4.750  1.00 94.50           C  
ATOM   2299  O   THR B  89     -38.398   0.277  -2.429  1.00 94.50           O  
ATOM   2300  CG2 THR B  89     -40.774   2.090  -5.965  1.00 94.50           C  
ATOM   2301  OG1 THR B  89     -39.898  -0.017  -5.193  1.00 94.50           O  
ATOM   2302  N   LEU B  90     -40.169   1.392  -1.559  1.00 96.18           N  
ATOM   2303  CA  LEU B  90     -40.132   0.704  -0.273  1.00 96.18           C  
ATOM   2304  C   LEU B  90     -41.450  -0.014  -0.002  1.00 96.18           C  
ATOM   2305  CB  LEU B  90     -39.834   1.693   0.856  1.00 96.18           C  
ATOM   2306  O   LEU B  90     -42.524   0.573  -0.155  1.00 96.18           O  
ATOM   2307  CG  LEU B  90     -39.951   1.151   2.282  1.00 96.18           C  
ATOM   2308  CD1 LEU B  90     -38.867   0.110   2.542  1.00 96.18           C  
ATOM   2309  CD2 LEU B  90     -39.864   2.287   3.295  1.00 96.18           C  
ATOM   2310  N   ASP B  91     -41.354  -1.312   0.269  1.00 95.47           N  
ATOM   2311  CA  ASP B  91     -42.457  -2.135   0.755  1.00 95.47           C  
ATOM   2312  C   ASP B  91     -42.206  -2.598   2.188  1.00 95.47           C  
ATOM   2313  CB  ASP B  91     -42.669  -3.343  -0.159  1.00 95.47           C  
ATOM   2314  O   ASP B  91     -41.460  -3.553   2.415  1.00 95.47           O  
ATOM   2315  CG  ASP B  91     -43.868  -4.186   0.240  1.00 95.47           C  
ATOM   2316  OD1 ASP B  91     -44.766  -3.675   0.944  1.00 95.47           O  
ATOM   2317  OD2 ASP B  91     -43.914  -5.372  -0.151  1.00 95.47           O  
ATOM   2318  N   ALA B  92     -42.906  -1.951   3.148  1.00 91.94           N  
ATOM   2319  CA  ALA B  92     -42.773  -2.286   4.564  1.00 91.94           C  
ATOM   2320  C   ALA B  92     -44.133  -2.298   5.255  1.00 91.94           C  
ATOM   2321  CB  ALA B  92     -41.835  -1.301   5.258  1.00 91.94           C  
ATOM   2322  O   ALA B  92     -44.514  -1.323   5.907  1.00 91.94           O  
ATOM   2323  N   PRO B  93     -44.979  -3.352   5.118  1.00 82.87           N  
ATOM   2324  CA  PRO B  93     -46.376  -3.387   5.555  1.00 82.87           C  
ATOM   2325  C   PRO B  93     -46.525  -3.252   7.069  1.00 82.87           C  
ATOM   2326  CB  PRO B  93     -46.861  -4.758   5.079  1.00 82.87           C  
ATOM   2327  O   PRO B  93     -47.492  -2.654   7.547  1.00 82.87           O  
ATOM   2328  CG  PRO B  93     -45.612  -5.543   4.840  1.00 82.87           C  
ATOM   2329  CD  PRO B  93     -44.483  -4.583   4.601  1.00 82.87           C  
ATOM   2330  N   GLU B  94     -45.516  -3.830   7.820  1.00 81.97           N  
ATOM   2331  CA  GLU B  94     -45.642  -3.821   9.275  1.00 81.97           C  
ATOM   2332  C   GLU B  94     -44.445  -3.138   9.929  1.00 81.97           C  
ATOM   2333  CB  GLU B  94     -45.790  -5.248   9.810  1.00 81.97           C  
ATOM   2334  O   GLU B  94     -43.302  -3.350   9.519  1.00 81.97           O  
ATOM   2335  CG  GLU B  94     -47.075  -5.938   9.373  1.00 81.97           C  
ATOM   2336  CD  GLU B  94     -47.228  -7.338   9.946  1.00 81.97           C  
ATOM   2337  OE1 GLU B  94     -48.260  -7.994   9.677  1.00 81.97           O  
ATOM   2338  OE2 GLU B  94     -46.309  -7.782  10.670  1.00 81.97           O  
ATOM   2339  N   PRO B  95     -44.718  -2.230  10.935  1.00 83.13           N  
ATOM   2340  CA  PRO B  95     -43.592  -1.665  11.683  1.00 83.13           C  
ATOM   2341  C   PRO B  95     -42.860  -2.708  12.525  1.00 83.13           C  
ATOM   2342  CB  PRO B  95     -44.254  -0.611  12.574  1.00 83.13           C  
ATOM   2343  O   PRO B  95     -43.497  -3.565  13.143  1.00 83.13           O  
ATOM   2344  CG  PRO B  95     -45.722  -0.852  12.424  1.00 83.13           C  
ATOM   2345  CD  PRO B  95     -45.931  -1.858  11.330  1.00 83.13           C  
ATOM   2346  N   VAL B  96     -41.520  -2.760  12.450  1.00 89.78           N  
ATOM   2347  CA  VAL B  96     -40.669  -3.686  13.191  1.00 89.78           C  
ATOM   2348  C   VAL B  96     -39.621  -2.906  13.982  1.00 89.78           C  
ATOM   2349  CB  VAL B  96     -39.981  -4.700  12.250  1.00 89.78           C  
ATOM   2350  O   VAL B  96     -38.917  -2.061  13.425  1.00 89.78           O  
ATOM   2351  CG1 VAL B  96     -39.115  -5.674  13.046  1.00 89.78           C  
ATOM   2352  CG2 VAL B  96     -41.022  -5.456  11.427  1.00 89.78           C  
ATOM   2353  N   THR B  97     -39.625  -3.183  15.290  1.00 91.60           N  
ATOM   2354  CA  THR B  97     -38.624  -2.533  16.129  1.00 91.60           C  
ATOM   2355  C   THR B  97     -37.547  -3.527  16.554  1.00 91.60           C  
ATOM   2356  CB  THR B  97     -39.268  -1.904  17.379  1.00 91.60           C  
ATOM   2357  O   THR B  97     -37.856  -4.643  16.976  1.00 91.60           O  
ATOM   2358  CG2 THR B  97     -38.242  -1.120  18.190  1.00 91.60           C  
ATOM   2359  OG1 THR B  97     -40.318  -1.017  16.973  1.00 91.60           O  
ATOM   2360  N   VAL B  98     -36.267  -3.142  16.331  1.00 91.78           N  
ATOM   2361  CA  VAL B  98     -35.141  -3.993  16.699  1.00 91.78           C  
ATOM   2362  C   VAL B  98     -34.145  -3.198  17.540  1.00 91.78           C  
ATOM   2363  CB  VAL B  98     -34.439  -4.577  15.452  1.00 91.78           C  
ATOM   2364  O   VAL B  98     -34.092  -1.969  17.453  1.00 91.78           O  
ATOM   2365  CG1 VAL B  98     -35.400  -5.455  14.653  1.00 91.78           C  
ATOM   2366  CG2 VAL B  98     -33.885  -3.453  14.577  1.00 91.78           C  
ATOM   2367  N   ARG B  99     -33.537  -3.911  18.470  1.00 91.57           N  
ATOM   2368  CA  ARG B  99     -32.407  -3.312  19.172  1.00 91.57           C  
ATOM   2369  C   ARG B  99     -31.179  -3.239  18.271  1.00 91.57           C  
ATOM   2370  CB  ARG B  99     -32.081  -4.103  20.440  1.00 91.57           C  
ATOM   2371  O   ARG B  99     -30.569  -4.265  17.961  1.00 91.57           O  
ATOM   2372  CG  ARG B  99     -32.926  -3.715  21.643  1.00 91.57           C  
ATOM   2373  CD  ARG B  99     -32.218  -4.027  22.954  1.00 91.57           C  
ATOM   2374  NE  ARG B  99     -31.219  -3.014  23.283  1.00 91.57           N  
ATOM   2375  NH1 ARG B  99     -32.264  -2.317  25.222  1.00 91.57           N  
ATOM   2376  NH2 ARG B  99     -30.302  -1.336  24.555  1.00 91.57           N  
ATOM   2377  CZ  ARG B  99     -31.264  -2.225  24.352  1.00 91.57           C  
ATOM   2378  N   ALA B 100     -30.915  -2.034  17.818  1.00 91.64           N  
ATOM   2379  CA  ALA B 100     -29.829  -1.874  16.854  1.00 91.64           C  
ATOM   2380  C   ALA B 100     -29.104  -0.547  17.060  1.00 91.64           C  
ATOM   2381  CB  ALA B 100     -30.365  -1.968  15.428  1.00 91.64           C  
ATOM   2382  O   ALA B 100     -29.492   0.254  17.913  1.00 91.64           O  
ATOM   2383  N   ARG B 101     -28.086  -0.416  16.402  1.00 89.26           N  
ATOM   2384  CA  ARG B 101     -27.343   0.838  16.333  1.00 89.26           C  
ATOM   2385  C   ARG B 101     -27.748   1.647  15.105  1.00 89.26           C  
ATOM   2386  CB  ARG B 101     -25.836   0.570  16.309  1.00 89.26           C  
ATOM   2387  O   ARG B 101     -27.289   1.373  13.995  1.00 89.26           O  
ATOM   2388  CG  ARG B 101     -25.329  -0.202  17.517  1.00 89.26           C  
ATOM   2389  CD  ARG B 101     -23.838  -0.493  17.416  1.00 89.26           C  
ATOM   2390  NE  ARG B 101     -23.358  -1.252  18.567  1.00 89.26           N  
ATOM   2391  NH1 ARG B 101     -23.576  -3.318  17.557  1.00 89.26           N  
ATOM   2392  NH2 ARG B 101     -22.795  -3.164  19.707  1.00 89.26           N  
ATOM   2393  CZ  ARG B 101     -23.244  -2.576  18.608  1.00 89.26           C  
ATOM   2394  N   PRO B 102     -28.528   2.700  15.254  1.00 89.09           N  
ATOM   2395  CA  PRO B 102     -29.215   3.406  14.170  1.00 89.09           C  
ATOM   2396  C   PRO B 102     -28.250   3.992  13.142  1.00 89.09           C  
ATOM   2397  CB  PRO B 102     -29.977   4.516  14.899  1.00 89.09           C  
ATOM   2398  O   PRO B 102     -28.467   3.852  11.936  1.00 89.09           O  
ATOM   2399  CG  PRO B 102     -30.129   4.018  16.300  1.00 89.09           C  
ATOM   2400  CD  PRO B 102     -28.986   3.093  16.605  1.00 89.09           C  
ATOM   2401  N   VAL B 103     -27.187   4.618  13.517  1.00 85.16           N  
ATOM   2402  CA  VAL B 103     -26.256   5.259  12.594  1.00 85.16           C  
ATOM   2403  C   VAL B 103     -25.562   4.200  11.741  1.00 85.16           C  
ATOM   2404  CB  VAL B 103     -25.208   6.111  13.345  1.00 85.16           C  
ATOM   2405  O   VAL B 103     -25.441   4.355  10.524  1.00 85.16           O  
ATOM   2406  CG1 VAL B 103     -24.167   6.665  12.374  1.00 85.16           C  
ATOM   2407  CG2 VAL B 103     -25.890   7.246  14.106  1.00 85.16           C  
ATOM   2408  N   ALA B 104     -25.149   3.112  12.402  1.00 85.04           N  
ATOM   2409  CA  ALA B 104     -24.466   2.034  11.690  1.00 85.04           C  
ATOM   2410  C   ALA B 104     -25.402   1.355  10.694  1.00 85.04           C  
ATOM   2411  CB  ALA B 104     -23.912   1.011  12.678  1.00 85.04           C  
ATOM   2412  O   ALA B 104     -25.018   1.089   9.553  1.00 85.04           O  
ATOM   2413  N   LEU B 105     -26.619   1.096  11.181  1.00 89.53           N  
ATOM   2414  CA  LEU B 105     -27.602   0.436  10.328  1.00 89.53           C  
ATOM   2415  C   LEU B 105     -27.985   1.328   9.151  1.00 89.53           C  
ATOM   2416  CB  LEU B 105     -28.851   0.070  11.134  1.00 89.53           C  
ATOM   2417  O   LEU B 105     -28.153   0.844   8.030  1.00 89.53           O  
ATOM   2418  CG  LEU B 105     -29.807  -0.931  10.483  1.00 89.53           C  
ATOM   2419  CD1 LEU B 105     -29.068  -2.218  10.129  1.00 89.53           C  
ATOM   2420  CD2 LEU B 105     -30.985  -1.223  11.406  1.00 89.53           C  
ATOM   2421  N   ARG B 106     -28.178   2.597   9.380  1.00 90.96           N  
ATOM   2422  CA  ARG B 106     -28.460   3.546   8.307  1.00 90.96           C  
ATOM   2423  C   ARG B 106     -27.356   3.526   7.255  1.00 90.96           C  
ATOM   2424  CB  ARG B 106     -28.623   4.960   8.869  1.00 90.96           C  
ATOM   2425  O   ARG B 106     -27.636   3.530   6.054  1.00 90.96           O  
ATOM   2426  CG  ARG B 106     -28.924   6.011   7.814  1.00 90.96           C  
ATOM   2427  CD  ARG B 106     -28.983   7.410   8.412  1.00 90.96           C  
ATOM   2428  NE  ARG B 106     -30.284   7.684   9.015  1.00 90.96           N  
ATOM   2429  NH1 ARG B 106     -31.217   8.575   7.098  1.00 90.96           N  
ATOM   2430  NH2 ARG B 106     -32.454   8.436   9.023  1.00 90.96           N  
ATOM   2431  CZ  ARG B 106     -31.315   8.231   8.377  1.00 90.96           C  
ATOM   2432  N   ARG B 107     -26.229   3.497   7.664  1.00 87.16           N  
ATOM   2433  CA  ARG B 107     -25.071   3.445   6.778  1.00 87.16           C  
ATOM   2434  C   ARG B 107     -25.092   2.183   5.923  1.00 87.16           C  
ATOM   2435  CB  ARG B 107     -23.772   3.509   7.585  1.00 87.16           C  
ATOM   2436  O   ARG B 107     -24.865   2.242   4.712  1.00 87.16           O  
ATOM   2437  CG  ARG B 107     -22.520   3.619   6.729  1.00 87.16           C  
ATOM   2438  CD  ARG B 107     -21.273   3.817   7.579  1.00 87.16           C  
ATOM   2439  NE  ARG B 107     -20.060   3.813   6.765  1.00 87.16           N  
ATOM   2440  NH1 ARG B 107     -18.609   3.944   8.557  1.00 87.16           N  
ATOM   2441  NH2 ARG B 107     -17.791   3.863   6.417  1.00 87.16           N  
ATOM   2442  CZ  ARG B 107     -18.823   3.874   7.248  1.00 87.16           C  
ATOM   2443  N   ALA B 108     -25.268   1.020   6.576  1.00 89.78           N  
ATOM   2444  CA  ALA B 108     -25.333  -0.252   5.861  1.00 89.78           C  
ATOM   2445  C   ALA B 108     -26.410  -0.219   4.780  1.00 89.78           C  
ATOM   2446  CB  ALA B 108     -25.597  -1.398   6.835  1.00 89.78           C  
ATOM   2447  O   ALA B 108     -26.154  -0.575   3.628  1.00 89.78           O  
ATOM   2448  N   LEU B 109     -27.497   0.315   5.127  1.00 93.81           N  
ATOM   2449  CA  LEU B 109     -28.628   0.365   4.208  1.00 93.81           C  
ATOM   2450  C   LEU B 109     -28.361   1.345   3.070  1.00 93.81           C  
ATOM   2451  CB  LEU B 109     -29.906   0.764   4.951  1.00 93.81           C  
ATOM   2452  O   LEU B 109     -28.672   1.059   1.912  1.00 93.81           O  
ATOM   2453  CG  LEU B 109     -30.426  -0.233   5.987  1.00 93.81           C  
ATOM   2454  CD1 LEU B 109     -31.547   0.394   6.810  1.00 93.81           C  
ATOM   2455  CD2 LEU B 109     -30.906  -1.511   5.307  1.00 93.81           C  
ATOM   2456  N   SER B 110     -27.827   2.461   3.404  1.00 91.24           N  
ATOM   2457  CA  SER B 110     -27.474   3.447   2.388  1.00 91.24           C  
ATOM   2458  C   SER B 110     -26.486   2.872   1.379  1.00 91.24           C  
ATOM   2459  CB  SER B 110     -26.882   4.699   3.037  1.00 91.24           C  
ATOM   2460  O   SER B 110     -26.633   3.078   0.172  1.00 91.24           O  
ATOM   2461  OG  SER B 110     -27.872   5.402   3.768  1.00 91.24           O  
ATOM   2462  N   ASN B 111     -25.481   2.172   1.883  1.00 88.11           N  
ATOM   2463  CA  ASN B 111     -24.471   1.563   1.024  1.00 88.11           C  
ATOM   2464  C   ASN B 111     -25.079   0.505   0.108  1.00 88.11           C  
ATOM   2465  CB  ASN B 111     -23.347   0.955   1.865  1.00 88.11           C  
ATOM   2466  O   ASN B 111     -24.728   0.423  -1.071  1.00 88.11           O  
ATOM   2467  CG  ASN B 111     -22.306   1.977   2.277  1.00 88.11           C  
ATOM   2468  ND2 ASN B 111     -21.712   1.781   3.448  1.00 88.11           N  
ATOM   2469  OD1 ASN B 111     -22.038   2.936   1.548  1.00 88.11           O  
ATOM   2470  N   LEU B 112     -25.987  -0.241   0.623  1.00 91.45           N  
ATOM   2471  CA  LEU B 112     -26.643  -1.291  -0.149  1.00 91.45           C  
ATOM   2472  C   LEU B 112     -27.493  -0.694  -1.266  1.00 91.45           C  
ATOM   2473  CB  LEU B 112     -27.513  -2.161   0.761  1.00 91.45           C  
ATOM   2474  O   LEU B 112     -27.405  -1.126  -2.417  1.00 91.45           O  
ATOM   2475  CG  LEU B 112     -26.787  -3.247   1.557  1.00 91.45           C  
ATOM   2476  CD1 LEU B 112     -27.747  -3.922   2.530  1.00 91.45           C  
ATOM   2477  CD2 LEU B 112     -26.162  -4.272   0.617  1.00 91.45           C  
ATOM   2478  N   ILE B 113     -28.254   0.302  -0.925  1.00 92.35           N  
ATOM   2479  CA  ILE B 113     -29.159   0.932  -1.879  1.00 92.35           C  
ATOM   2480  C   ILE B 113     -28.353   1.700  -2.925  1.00 92.35           C  
ATOM   2481  CB  ILE B 113     -30.157   1.876  -1.172  1.00 92.35           C  
ATOM   2482  O   ILE B 113     -28.685   1.677  -4.113  1.00 92.35           O  
ATOM   2483  CG1 ILE B 113     -31.089   1.077  -0.254  1.00 92.35           C  
ATOM   2484  CG2 ILE B 113     -30.959   2.681  -2.199  1.00 92.35           C  
ATOM   2485  CD1 ILE B 113     -32.026   1.940   0.579  1.00 92.35           C  
ATOM   2486  N   ASP B 114     -27.348   2.371  -2.472  1.00 88.80           N  
ATOM   2487  CA  ASP B 114     -26.464   3.079  -3.392  1.00 88.80           C  
ATOM   2488  C   ASP B 114     -25.897   2.132  -4.447  1.00 88.80           C  
ATOM   2489  CB  ASP B 114     -25.325   3.757  -2.627  1.00 88.80           C  
ATOM   2490  O   ASP B 114     -25.884   2.455  -5.636  1.00 88.80           O  
ATOM   2491  CG  ASP B 114     -24.471   4.653  -3.507  1.00 88.80           C  
ATOM   2492  OD1 ASP B 114     -25.014   5.589  -4.133  1.00 88.80           O  
ATOM   2493  OD2 ASP B 114     -23.245   4.420  -3.577  1.00 88.80           O  
ATOM   2494  N   ASN B 115     -25.459   0.950  -3.990  1.00 87.97           N  
ATOM   2495  CA  ASN B 115     -24.937  -0.049  -4.916  1.00 87.97           C  
ATOM   2496  C   ASN B 115     -26.007  -0.518  -5.897  1.00 87.97           C  
ATOM   2497  CB  ASN B 115     -24.360  -1.241  -4.149  1.00 87.97           C  
ATOM   2498  O   ASN B 115     -25.738  -0.671  -7.090  1.00 87.97           O  
ATOM   2499  CG  ASN B 115     -22.999  -0.947  -3.549  1.00 87.97           C  
ATOM   2500  ND2 ASN B 115     -22.581  -1.770  -2.595  1.00 87.97           N  
ATOM   2501  OD1 ASN B 115     -22.330   0.013  -3.939  1.00 87.97           O  
ATOM   2502  N   ALA B 116     -27.100  -0.697  -5.413  1.00 89.77           N  
ATOM   2503  CA  ALA B 116     -28.221  -1.159  -6.228  1.00 89.77           C  
ATOM   2504  C   ALA B 116     -28.594  -0.123  -7.285  1.00 89.77           C  
ATOM   2505  CB  ALA B 116     -29.427  -1.472  -5.346  1.00 89.77           C  
ATOM   2506  O   ALA B 116     -28.881  -0.473  -8.432  1.00 89.77           O  
ATOM   2507  N   VAL B 117     -28.602   1.130  -6.937  1.00 88.85           N  
ATOM   2508  CA  VAL B 117     -28.937   2.230  -7.835  1.00 88.85           C  
ATOM   2509  C   VAL B 117     -27.873   2.350  -8.924  1.00 88.85           C  
ATOM   2510  CB  VAL B 117     -29.070   3.566  -7.070  1.00 88.85           C  
ATOM   2511  O   VAL B 117     -28.197   2.557 -10.096  1.00 88.85           O  
ATOM   2512  CG1 VAL B 117     -29.151   4.740  -8.044  1.00 88.85           C  
ATOM   2513  CG2 VAL B 117     -30.296   3.538  -6.159  1.00 88.85           C  
ATOM   2514  N   ARG B 118     -26.699   2.204  -8.593  1.00 83.55           N  
ATOM   2515  CA  ARG B 118     -25.588   2.344  -9.528  1.00 83.55           C  
ATOM   2516  C   ARG B 118     -25.622   1.247 -10.587  1.00 83.55           C  
ATOM   2517  CB  ARG B 118     -24.251   2.312  -8.784  1.00 83.55           C  
ATOM   2518  O   ARG B 118     -25.360   1.505 -11.764  1.00 83.55           O  
ATOM   2519  CG  ARG B 118     -23.925   3.602  -8.048  1.00 83.55           C  
ATOM   2520  CD  ARG B 118     -22.568   3.532  -7.361  1.00 83.55           C  
ATOM   2521  NE  ARG B 118     -22.281   4.750  -6.609  1.00 83.55           N  
ATOM   2522  NH1 ARG B 118     -20.161   4.099  -5.964  1.00 83.55           N  
ATOM   2523  NH2 ARG B 118     -20.988   6.134  -5.310  1.00 83.55           N  
ATOM   2524  CZ  ARG B 118     -21.144   4.992  -5.963  1.00 83.55           C  
ATOM   2525  N   TYR B 119     -26.096   0.030 -10.209  1.00 82.53           N  
ATOM   2526  CA  TYR B 119     -25.972  -1.103 -11.119  1.00 82.53           C  
ATOM   2527  C   TYR B 119     -27.316  -1.446 -11.749  1.00 82.53           C  
ATOM   2528  CB  TYR B 119     -25.413  -2.325 -10.383  1.00 82.53           C  
ATOM   2529  O   TYR B 119     -27.369  -2.036 -12.831  1.00 82.53           O  
ATOM   2530  CG  TYR B 119     -23.958  -2.191 -10.002  1.00 82.53           C  
ATOM   2531  CD1 TYR B 119     -22.949  -2.452 -10.926  1.00 82.53           C  
ATOM   2532  CD2 TYR B 119     -23.591  -1.803  -8.718  1.00 82.53           C  
ATOM   2533  CE1 TYR B 119     -21.608  -2.332 -10.579  1.00 82.53           C  
ATOM   2534  CE2 TYR B 119     -22.252  -1.680  -8.360  1.00 82.53           C  
ATOM   2535  OH  TYR B 119     -19.943  -1.825  -8.946  1.00 82.53           O  
ATOM   2536  CZ  TYR B 119     -21.270  -1.946  -9.296  1.00 82.53           C  
ATOM   2537  N   GLY B 120     -28.490  -1.283 -11.175  1.00 77.40           N  
ATOM   2538  CA  GLY B 120     -29.766  -1.874 -11.546  1.00 77.40           C  
ATOM   2539  C   GLY B 120     -30.801  -0.846 -11.964  1.00 77.40           C  
ATOM   2540  O   GLY B 120     -31.746  -1.169 -12.686  1.00 77.40           O  
ATOM   2541  N   GLY B 121     -30.445   0.524 -11.899  1.00 80.34           N  
ATOM   2542  CA  GLY B 121     -31.340   1.641 -12.156  1.00 80.34           C  
ATOM   2543  C   GLY B 121     -32.538   1.672 -11.226  1.00 80.34           C  
ATOM   2544  O   GLY B 121     -32.669   2.580 -10.402  1.00 80.34           O  
ATOM   2545  N   GLN B 122     -33.572   0.492 -11.251  1.00 89.40           N  
ATOM   2546  CA  GLN B 122     -34.723   0.406 -10.359  1.00 89.40           C  
ATOM   2547  C   GLN B 122     -34.417  -0.471  -9.148  1.00 89.40           C  
ATOM   2548  CB  GLN B 122     -35.943  -0.137 -11.105  1.00 89.40           C  
ATOM   2549  O   GLN B 122     -33.968  -1.609  -9.298  1.00 89.40           O  
ATOM   2550  CG  GLN B 122     -36.480   0.807 -12.173  1.00 89.40           C  
ATOM   2551  CD  GLN B 122     -37.710   0.260 -12.874  1.00 89.40           C  
ATOM   2552  NE2 GLN B 122     -38.496   1.149 -13.470  1.00 89.40           N  
ATOM   2553  OE1 GLN B 122     -37.951  -0.951 -12.879  1.00 89.40           O  
ATOM   2554  N   VAL B 123     -34.719   0.102  -8.002  1.00 94.58           N  
ATOM   2555  CA  VAL B 123     -34.384  -0.597  -6.766  1.00 94.58           C  
ATOM   2556  C   VAL B 123     -35.643  -0.789  -5.923  1.00 94.58           C  
ATOM   2557  CB  VAL B 123     -33.311   0.164  -5.956  1.00 94.58           C  
ATOM   2558  O   VAL B 123     -36.432   0.144  -5.755  1.00 94.58           O  
ATOM   2559  CG1 VAL B 123     -32.952  -0.601  -4.683  1.00 94.58           C  
ATOM   2560  CG2 VAL B 123     -32.066   0.399  -6.810  1.00 94.58           C  
ATOM   2561  N   ARG B 124     -35.872  -2.036  -5.482  1.00 95.34           N  
ATOM   2562  CA  ARG B 124     -36.975  -2.351  -4.580  1.00 95.34           C  
ATOM   2563  C   ARG B 124     -36.457  -2.800  -3.218  1.00 95.34           C  
ATOM   2564  CB  ARG B 124     -37.870  -3.436  -5.183  1.00 95.34           C  
ATOM   2565  O   ARG B 124     -35.651  -3.729  -3.130  1.00 95.34           O  
ATOM   2566  CG  ARG B 124     -39.085  -3.775  -4.335  1.00 95.34           C  
ATOM   2567  CD  ARG B 124     -39.932  -4.867  -4.972  1.00 95.34           C  
ATOM   2568  NE  ARG B 124     -40.594  -4.397  -6.186  1.00 95.34           N  
ATOM   2569  NH1 ARG B 124     -41.504  -6.449  -6.732  1.00 95.34           N  
ATOM   2570  NH2 ARG B 124     -41.883  -4.628  -8.072  1.00 95.34           N  
ATOM   2571  CZ  ARG B 124     -41.325  -5.159  -6.994  1.00 95.34           C  
ATOM   2572  N   VAL B 125     -36.949  -2.081  -2.197  1.00 97.14           N  
ATOM   2573  CA  VAL B 125     -36.581  -2.431  -0.829  1.00 97.14           C  
ATOM   2574  C   VAL B 125     -37.801  -2.979  -0.090  1.00 97.14           C  
ATOM   2575  CB  VAL B 125     -35.998  -1.218  -0.069  1.00 97.14           C  
ATOM   2576  O   VAL B 125     -38.881  -2.385  -0.137  1.00 97.14           O  
ATOM   2577  CG1 VAL B 125     -35.526  -1.630   1.324  1.00 97.14           C  
ATOM   2578  CG2 VAL B 125     -34.852  -0.593  -0.863  1.00 97.14           C  
ATOM   2579  N   SER B 126     -37.670  -4.191   0.561  1.00 95.49           N  
ATOM   2580  CA  SER B 126     -38.789  -4.769   1.297  1.00 95.49           C  
ATOM   2581  C   SER B 126     -38.372  -5.180   2.705  1.00 95.49           C  
ATOM   2582  CB  SER B 126     -39.354  -5.978   0.551  1.00 95.49           C  
ATOM   2583  O   SER B 126     -37.218  -5.548   2.934  1.00 95.49           O  
ATOM   2584  OG  SER B 126     -38.342  -6.940   0.312  1.00 95.49           O  
ATOM   2585  N   LEU B 127     -39.277  -4.978   3.582  1.00 96.01           N  
ATOM   2586  CA  LEU B 127     -39.096  -5.352   4.981  1.00 96.01           C  
ATOM   2587  C   LEU B 127     -40.136  -6.383   5.406  1.00 96.01           C  
ATOM   2588  CB  LEU B 127     -39.185  -4.118   5.882  1.00 96.01           C  
ATOM   2589  O   LEU B 127     -41.336  -6.176   5.214  1.00 96.01           O  
ATOM   2590  CG  LEU B 127     -39.117  -4.372   7.388  1.00 96.01           C  
ATOM   2591  CD1 LEU B 127     -37.736  -4.891   7.776  1.00 96.01           C  
ATOM   2592  CD2 LEU B 127     -39.452  -3.100   8.161  1.00 96.01           C  
ATOM   2593  N   SER B 128     -39.653  -7.578   5.868  1.00 93.31           N  
ATOM   2594  CA  SER B 128     -40.567  -8.617   6.330  1.00 93.31           C  
ATOM   2595  C   SER B 128     -40.068  -9.258   7.621  1.00 93.31           C  
ATOM   2596  CB  SER B 128     -40.747  -9.690   5.255  1.00 93.31           C  
ATOM   2597  O   SER B 128     -38.893  -9.128   7.971  1.00 93.31           O  
ATOM   2598  OG  SER B 128     -39.524 -10.363   5.006  1.00 93.31           O  
ATOM   2599  N   ARG B 129     -40.994  -9.792   8.342  1.00 89.75           N  
ATOM   2600  CA  ARG B 129     -40.695 -10.539   9.559  1.00 89.75           C  
ATOM   2601  C   ARG B 129     -40.837 -12.040   9.329  1.00 89.75           C  
ATOM   2602  CB  ARG B 129     -41.610 -10.095  10.702  1.00 89.75           C  
ATOM   2603  O   ARG B 129     -41.834 -12.495   8.763  1.00 89.75           O  
ATOM   2604  CG  ARG B 129     -41.178 -10.602  12.069  1.00 89.75           C  
ATOM   2605  CD  ARG B 129     -42.057 -10.044  13.180  1.00 89.75           C  
ATOM   2606  NE  ARG B 129     -41.669 -10.567  14.487  1.00 89.75           N  
ATOM   2607  NH1 ARG B 129     -43.129  -9.234  15.683  1.00 89.75           N  
ATOM   2608  NH2 ARG B 129     -41.761 -10.713  16.778  1.00 89.75           N  
ATOM   2609  CZ  ARG B 129     -42.187 -10.170  15.647  1.00 89.75           C  
ATOM   2610  N   ASP B 130     -39.759 -12.791   9.538  1.00 86.95           N  
ATOM   2611  CA  ASP B 130     -39.764 -14.249   9.469  1.00 86.95           C  
ATOM   2612  C   ASP B 130     -39.469 -14.864  10.836  1.00 86.95           C  
ATOM   2613  CB  ASP B 130     -38.745 -14.741   8.440  1.00 86.95           C  
ATOM   2614  O   ASP B 130     -38.307 -14.993  11.226  1.00 86.95           O  
ATOM   2615  CG  ASP B 130     -38.786 -16.246   8.237  1.00 86.95           C  
ATOM   2616  OD1 ASP B 130     -39.789 -16.886   8.620  1.00 86.95           O  
ATOM   2617  OD2 ASP B 130     -37.805 -16.797   7.692  1.00 86.95           O  
ATOM   2618  N   GLY B 131     -40.555 -15.267  11.632  1.00 87.51           N  
ATOM   2619  CA  GLY B 131     -40.363 -15.749  12.990  1.00 87.51           C  
ATOM   2620  C   GLY B 131     -39.775 -14.702  13.917  1.00 87.51           C  
ATOM   2621  O   GLY B 131     -40.343 -13.621  14.081  1.00 87.51           O  
ATOM   2622  N   ASP B 132     -38.619 -15.025  14.478  1.00 86.21           N  
ATOM   2623  CA  ASP B 132     -37.961 -14.121  15.417  1.00 86.21           C  
ATOM   2624  C   ASP B 132     -36.905 -13.272  14.713  1.00 86.21           C  
ATOM   2625  CB  ASP B 132     -37.324 -14.909  16.563  1.00 86.21           C  
ATOM   2626  O   ASP B 132     -36.106 -12.598  15.367  1.00 86.21           O  
ATOM   2627  CG  ASP B 132     -38.336 -15.384  17.591  1.00 86.21           C  
ATOM   2628  OD1 ASP B 132     -39.479 -14.877  17.601  1.00 86.21           O  
ATOM   2629  OD2 ASP B 132     -37.988 -16.272  18.399  1.00 86.21           O  
ATOM   2630  N   ARG B 133     -36.939 -13.341  13.409  1.00 92.00           N  
ATOM   2631  CA  ARG B 133     -35.919 -12.605  12.669  1.00 92.00           C  
ATOM   2632  C   ARG B 133     -36.554 -11.602  11.712  1.00 92.00           C  
ATOM   2633  CB  ARG B 133     -35.015 -13.567  11.896  1.00 92.00           C  
ATOM   2634  O   ARG B 133     -37.675 -11.809  11.241  1.00 92.00           O  
ATOM   2635  CG  ARG B 133     -34.284 -14.567  12.777  1.00 92.00           C  
ATOM   2636  CD  ARG B 133     -33.320 -15.428  11.972  1.00 92.00           C  
ATOM   2637  NE  ARG B 133     -32.535 -16.308  12.834  1.00 92.00           N  
ATOM   2638  NH1 ARG B 133     -30.507 -15.312  12.353  1.00 92.00           N  
ATOM   2639  NH2 ARG B 133     -30.604 -17.084  13.804  1.00 92.00           N  
ATOM   2640  CZ  ARG B 133     -31.217 -16.233  12.995  1.00 92.00           C  
ATOM   2641  N   VAL B 134     -35.825 -10.544  11.489  1.00 93.43           N  
ATOM   2642  CA  VAL B 134     -36.251  -9.532  10.528  1.00 93.43           C  
ATOM   2643  C   VAL B 134     -35.408  -9.637   9.259  1.00 93.43           C  
ATOM   2644  CB  VAL B 134     -36.148  -8.108  11.119  1.00 93.43           C  
ATOM   2645  O   VAL B 134     -34.195  -9.846   9.328  1.00 93.43           O  
ATOM   2646  CG1 VAL B 134     -36.607  -7.066  10.101  1.00 93.43           C  
ATOM   2647  CG2 VAL B 134     -36.971  -8.004  12.402  1.00 93.43           C  
ATOM   2648  N   VAL B 135     -36.171  -9.553   8.139  1.00 95.16           N  
ATOM   2649  CA  VAL B 135     -35.468  -9.707   6.870  1.00 95.16           C  
ATOM   2650  C   VAL B 135     -35.652  -8.450   6.021  1.00 95.16           C  
ATOM   2651  CB  VAL B 135     -35.960 -10.950   6.095  1.00 95.16           C  
ATOM   2652  O   VAL B 135     -36.781  -8.027   5.764  1.00 95.16           O  
ATOM   2653  CG1 VAL B 135     -35.198 -11.103   4.780  1.00 95.16           C  
ATOM   2654  CG2 VAL B 135     -35.812 -12.205   6.952  1.00 95.16           C  
ATOM   2655  N   ILE B 136     -34.535  -7.825   5.683  1.00 96.77           N  
ATOM   2656  CA  ILE B 136     -34.519  -6.711   4.741  1.00 96.77           C  
ATOM   2657  C   ILE B 136     -33.997  -7.188   3.388  1.00 96.77           C  
ATOM   2658  CB  ILE B 136     -33.658  -5.540   5.265  1.00 96.77           C  
ATOM   2659  O   ILE B 136     -32.910  -7.766   3.303  1.00 96.77           O  
ATOM   2660  CG1 ILE B 136     -34.137  -5.106   6.655  1.00 96.77           C  
ATOM   2661  CG2 ILE B 136     -33.689  -4.365   4.283  1.00 96.77           C  
ATOM   2662  CD1 ILE B 136     -33.161  -4.198   7.390  1.00 96.77           C  
ATOM   2663  N   THR B 137     -34.813  -6.930   2.340  1.00 96.41           N  
ATOM   2664  CA  THR B 137     -34.421  -7.362   1.003  1.00 96.41           C  
ATOM   2665  C   THR B 137     -34.280  -6.164   0.068  1.00 96.41           C  
ATOM   2666  CB  THR B 137     -35.438  -8.358   0.417  1.00 96.41           C  
ATOM   2667  O   THR B 137     -35.170  -5.314   0.002  1.00 96.41           O  
ATOM   2668  CG2 THR B 137     -34.966  -8.898  -0.929  1.00 96.41           C  
ATOM   2669  OG1 THR B 137     -35.604  -9.453   1.326  1.00 96.41           O  
ATOM   2670  N   VAL B 138     -33.109  -6.036  -0.555  1.00 96.03           N  
ATOM   2671  CA  VAL B 138     -32.861  -5.025  -1.578  1.00 96.03           C  
ATOM   2672  C   VAL B 138     -32.675  -5.698  -2.936  1.00 96.03           C  
ATOM   2673  CB  VAL B 138     -31.625  -4.163  -1.237  1.00 96.03           C  
ATOM   2674  O   VAL B 138     -31.752  -6.495  -3.119  1.00 96.03           O  
ATOM   2675  CG1 VAL B 138     -31.402  -3.093  -2.304  1.00 96.03           C  
ATOM   2676  CG2 VAL B 138     -31.786  -3.522   0.141  1.00 96.03           C  
ATOM   2677  N   GLU B 139     -33.531  -5.293  -3.896  1.00 95.00           N  
ATOM   2678  CA  GLU B 139     -33.496  -5.894  -5.226  1.00 95.00           C  
ATOM   2679  C   GLU B 139     -33.269  -4.837  -6.303  1.00 95.00           C  
ATOM   2680  CB  GLU B 139     -34.792  -6.659  -5.505  1.00 95.00           C  
ATOM   2681  O   GLU B 139     -33.851  -3.751  -6.248  1.00 95.00           O  
ATOM   2682  CG  GLU B 139     -35.017  -7.846  -4.579  1.00 95.00           C  
ATOM   2683  CD  GLU B 139     -36.324  -8.575  -4.845  1.00 95.00           C  
ATOM   2684  OE1 GLU B 139     -36.309  -9.820  -4.974  1.00 95.00           O  
ATOM   2685  OE2 GLU B 139     -37.372  -7.895  -4.925  1.00 95.00           O  
ATOM   2686  N   ASP B 140     -32.422  -5.231  -7.247  1.00 93.73           N  
ATOM   2687  CA  ASP B 140     -32.196  -4.330  -8.373  1.00 93.73           C  
ATOM   2688  C   ASP B 140     -32.357  -5.062  -9.703  1.00 93.73           C  
ATOM   2689  CB  ASP B 140     -30.805  -3.699  -8.285  1.00 93.73           C  
ATOM   2690  O   ASP B 140     -32.555  -6.278  -9.729  1.00 93.73           O  
ATOM   2691  CG  ASP B 140     -29.685  -4.698  -8.522  1.00 93.73           C  
ATOM   2692  OD1 ASP B 140     -29.213  -4.822  -9.672  1.00 93.73           O  
ATOM   2693  OD2 ASP B 140     -29.274  -5.368  -7.550  1.00 93.73           O  
ATOM   2694  N   ASP B 141     -32.414  -4.268 -10.782  1.00 89.89           N  
ATOM   2695  CA  ASP B 141     -32.579  -4.875 -12.099  1.00 89.89           C  
ATOM   2696  C   ASP B 141     -31.266  -4.862 -12.879  1.00 89.89           C  
ATOM   2697  CB  ASP B 141     -33.668  -4.150 -12.892  1.00 89.89           C  
ATOM   2698  O   ASP B 141     -31.270  -4.819 -14.111  1.00 89.89           O  
ATOM   2699  CG  ASP B 141     -33.374  -2.673 -13.089  1.00 89.89           C  
ATOM   2700  OD1 ASP B 141     -32.459  -2.139 -12.426  1.00 89.89           O  
ATOM   2701  OD2 ASP B 141     -34.066  -2.036 -13.913  1.00 89.89           O  
ATOM   2702  N   GLY B 142     -30.154  -4.770 -12.196  1.00 87.02           N  
ATOM   2703  CA  GLY B 142     -28.860  -4.760 -12.860  1.00 87.02           C  
ATOM   2704  C   GLY B 142     -28.428  -6.131 -13.345  1.00 87.02           C  
ATOM   2705  O   GLY B 142     -29.233  -7.063 -13.384  1.00 87.02           O  
ATOM   2706  N   PRO B 143     -27.161  -6.357 -13.864  1.00 85.54           N  
ATOM   2707  CA  PRO B 143     -26.669  -7.568 -14.525  1.00 85.54           C  
ATOM   2708  C   PRO B 143     -26.472  -8.731 -13.555  1.00 85.54           C  
ATOM   2709  CB  PRO B 143     -25.331  -7.124 -15.124  1.00 85.54           C  
ATOM   2710  O   PRO B 143     -26.363  -9.883 -13.981  1.00 85.54           O  
ATOM   2711  CG  PRO B 143     -24.903  -5.964 -14.284  1.00 85.54           C  
ATOM   2712  CD  PRO B 143     -26.131  -5.244 -13.804  1.00 85.54           C  
ATOM   2713  N   GLY B 144     -26.598  -8.415 -12.246  1.00 85.16           N  
ATOM   2714  CA  GLY B 144     -26.251  -9.435 -11.270  1.00 85.16           C  
ATOM   2715  C   GLY B 144     -24.755  -9.635 -11.122  1.00 85.16           C  
ATOM   2716  O   GLY B 144     -23.964  -8.806 -11.578  1.00 85.16           O  
ATOM   2717  N   ILE B 145     -24.433 -10.737 -10.340  1.00 87.34           N  
ATOM   2718  CA  ILE B 145     -23.037 -11.050 -10.058  1.00 87.34           C  
ATOM   2719  C   ILE B 145     -22.739 -12.492 -10.465  1.00 87.34           C  
ATOM   2720  CB  ILE B 145     -22.700 -10.835  -8.565  1.00 87.34           C  
ATOM   2721  O   ILE B 145     -23.501 -13.405 -10.140  1.00 87.34           O  
ATOM   2722  CG1 ILE B 145     -23.009  -9.392  -8.151  1.00 87.34           C  
ATOM   2723  CG2 ILE B 145     -21.234 -11.183  -8.287  1.00 87.34           C  
ATOM   2724  CD1 ILE B 145     -22.870  -9.133  -6.657  1.00 87.34           C  
ATOM   2725  N   PRO B 146     -21.687 -12.669 -11.262  1.00 86.05           N  
ATOM   2726  CA  PRO B 146     -21.300 -14.051 -11.558  1.00 86.05           C  
ATOM   2727  C   PRO B 146     -21.208 -14.919 -10.305  1.00 86.05           C  
ATOM   2728  CB  PRO B 146     -19.928 -13.899 -12.219  1.00 86.05           C  
ATOM   2729  O   PRO B 146     -20.723 -14.462  -9.267  1.00 86.05           O  
ATOM   2730  CG  PRO B 146     -19.891 -12.485 -12.702  1.00 86.05           C  
ATOM   2731  CD  PRO B 146     -20.741 -11.647 -11.790  1.00 86.05           C  
ATOM   2732  N   PRO B 147     -21.684 -16.185 -10.447  1.00 85.49           N  
ATOM   2733  CA  PRO B 147     -21.786 -17.069  -9.283  1.00 85.49           C  
ATOM   2734  C   PRO B 147     -20.453 -17.251  -8.562  1.00 85.49           C  
ATOM   2735  CB  PRO B 147     -22.266 -18.391  -9.887  1.00 85.49           C  
ATOM   2736  O   PRO B 147     -20.421 -17.355  -7.333  1.00 85.49           O  
ATOM   2737  CG  PRO B 147     -22.967 -18.004 -11.148  1.00 85.49           C  
ATOM   2738  CD  PRO B 147     -22.326 -16.757 -11.687  1.00 85.49           C  
ATOM   2739  N   ASP B 148     -19.308 -17.275  -9.252  1.00 83.87           N  
ATOM   2740  CA  ASP B 148     -18.008 -17.481  -8.622  1.00 83.87           C  
ATOM   2741  C   ASP B 148     -17.545 -16.221  -7.894  1.00 83.87           C  
ATOM   2742  CB  ASP B 148     -16.967 -17.899  -9.663  1.00 83.87           C  
ATOM   2743  O   ASP B 148     -16.604 -16.267  -7.100  1.00 83.87           O  
ATOM   2744  CG  ASP B 148     -16.910 -16.959 -10.855  1.00 83.87           C  
ATOM   2745  OD1 ASP B 148     -17.975 -16.512 -11.330  1.00 83.87           O  
ATOM   2746  OD2 ASP B 148     -15.789 -16.667 -11.324  1.00 83.87           O  
ATOM   2747  N   GLU B 149     -18.324 -15.111  -8.030  1.00 85.45           N  
ATOM   2748  CA  GLU B 149     -17.903 -13.838  -7.455  1.00 85.45           C  
ATOM   2749  C   GLU B 149     -18.821 -13.417  -6.311  1.00 85.45           C  
ATOM   2750  CB  GLU B 149     -17.868 -12.748  -8.530  1.00 85.45           C  
ATOM   2751  O   GLU B 149     -18.560 -12.423  -5.632  1.00 85.45           O  
ATOM   2752  CG  GLU B 149     -16.788 -12.955  -9.581  1.00 85.45           C  
ATOM   2753  CD  GLU B 149     -16.601 -11.753 -10.494  1.00 85.45           C  
ATOM   2754  OE1 GLU B 149     -15.865 -11.865 -11.501  1.00 85.45           O  
ATOM   2755  OE2 GLU B 149     -17.195 -10.692 -10.200  1.00 85.45           O  
ATOM   2756  N   LEU B 150     -19.864 -14.177  -6.018  1.00 87.44           N  
ATOM   2757  CA  LEU B 150     -20.891 -13.791  -5.057  1.00 87.44           C  
ATOM   2758  C   LEU B 150     -20.300 -13.640  -3.660  1.00 87.44           C  
ATOM   2759  CB  LEU B 150     -22.021 -14.825  -5.036  1.00 87.44           C  
ATOM   2760  O   LEU B 150     -20.636 -12.699  -2.937  1.00 87.44           O  
ATOM   2761  CG  LEU B 150     -23.028 -14.752  -6.185  1.00 87.44           C  
ATOM   2762  CD1 LEU B 150     -23.953 -15.964  -6.157  1.00 87.44           C  
ATOM   2763  CD2 LEU B 150     -23.832 -13.458  -6.110  1.00 87.44           C  
ATOM   2764  N   GLU B 151     -19.394 -14.549  -3.378  1.00 86.49           N  
ATOM   2765  CA  GLU B 151     -18.778 -14.453  -2.058  1.00 86.49           C  
ATOM   2766  C   GLU B 151     -17.621 -13.457  -2.060  1.00 86.49           C  
ATOM   2767  CB  GLU B 151     -18.289 -15.826  -1.592  1.00 86.49           C  
ATOM   2768  O   GLU B 151     -17.405 -12.747  -1.076  1.00 86.49           O  
ATOM   2769  CG  GLU B 151     -17.872 -15.866  -0.128  1.00 86.49           C  
ATOM   2770  CD  GLU B 151     -19.003 -15.517   0.827  1.00 86.49           C  
ATOM   2771  OE1 GLU B 151     -18.721 -15.095   1.972  1.00 86.49           O  
ATOM   2772  OE2 GLU B 151     -20.179 -15.667   0.427  1.00 86.49           O  
ATOM   2773  N   ARG B 152     -16.984 -13.251  -3.125  1.00 82.52           N  
ATOM   2774  CA  ARG B 152     -15.785 -12.429  -3.248  1.00 82.52           C  
ATOM   2775  C   ARG B 152     -16.126 -10.945  -3.158  1.00 82.52           C  
ATOM   2776  CB  ARG B 152     -15.065 -12.721  -4.567  1.00 82.52           C  
ATOM   2777  O   ARG B 152     -15.292 -10.134  -2.753  1.00 82.52           O  
ATOM   2778  CG  ARG B 152     -14.365 -14.071  -4.600  1.00 82.52           C  
ATOM   2779  CD  ARG B 152     -13.647 -14.301  -5.923  1.00 82.52           C  
ATOM   2780  NE  ARG B 152     -12.512 -13.397  -6.085  1.00 82.52           N  
ATOM   2781  NH1 ARG B 152     -12.179 -13.884  -8.319  1.00 82.52           N  
ATOM   2782  NH2 ARG B 152     -10.823 -12.372  -7.255  1.00 82.52           N  
ATOM   2783  CZ  ARG B 152     -11.841 -13.220  -7.219  1.00 82.52           C  
ATOM   2784  N   VAL B 153     -17.366 -10.574  -3.473  1.00 85.42           N  
ATOM   2785  CA  VAL B 153     -17.764  -9.171  -3.519  1.00 85.42           C  
ATOM   2786  C   VAL B 153     -17.773  -8.590  -2.107  1.00 85.42           C  
ATOM   2787  CB  VAL B 153     -19.151  -8.995  -4.176  1.00 85.42           C  
ATOM   2788  O   VAL B 153     -17.770  -7.369  -1.931  1.00 85.42           O  
ATOM   2789  CG1 VAL B 153     -19.091  -9.342  -5.663  1.00 85.42           C  
ATOM   2790  CG2 VAL B 153     -20.191  -9.857  -3.464  1.00 85.42           C  
ATOM   2791  N   PHE B 154     -17.839  -9.534  -1.148  1.00 84.25           N  
ATOM   2792  CA  PHE B 154     -17.806  -9.065   0.232  1.00 84.25           C  
ATOM   2793  C   PHE B 154     -16.379  -8.749   0.663  1.00 84.25           C  
ATOM   2794  CB  PHE B 154     -18.419 -10.108   1.171  1.00 84.25           C  
ATOM   2795  O   PHE B 154     -16.161  -8.147   1.717  1.00 84.25           O  
ATOM   2796  CG  PHE B 154     -19.919 -10.191   1.090  1.00 84.25           C  
ATOM   2797  CD1 PHE B 154     -20.714  -9.169   1.594  1.00 84.25           C  
ATOM   2798  CD2 PHE B 154     -20.535 -11.292   0.509  1.00 84.25           C  
ATOM   2799  CE1 PHE B 154     -22.103  -9.243   1.520  1.00 84.25           C  
ATOM   2800  CE2 PHE B 154     -21.923 -11.373   0.431  1.00 84.25           C  
ATOM   2801  CZ  PHE B 154     -22.705 -10.348   0.938  1.00 84.25           C  
ATOM   2802  N   GLU B 155     -15.428  -9.295  -0.193  1.00 75.11           N  
ATOM   2803  CA  GLU B 155     -14.039  -8.986   0.131  1.00 75.11           C  
ATOM   2804  C   GLU B 155     -13.746  -7.500  -0.053  1.00 75.11           C  
ATOM   2805  CB  GLU B 155     -13.087  -9.820  -0.731  1.00 75.11           C  
ATOM   2806  O   GLU B 155     -14.194  -6.890  -1.027  1.00 75.11           O  
ATOM   2807  CG  GLU B 155     -13.123 -11.310  -0.422  1.00 75.11           C  
ATOM   2808  CD  GLU B 155     -12.202 -12.130  -1.312  1.00 75.11           C  
ATOM   2809  OE1 GLU B 155     -12.197 -13.376  -1.195  1.00 75.11           O  
ATOM   2810  OE2 GLU B 155     -11.479 -11.520  -2.132  1.00 75.11           O  
ATOM   2811  N   PRO B 156     -13.109  -6.896   0.977  1.00 66.79           N  
ATOM   2812  CA  PRO B 156     -12.772  -5.475   0.853  1.00 66.79           C  
ATOM   2813  C   PRO B 156     -12.047  -5.152  -0.452  1.00 66.79           C  
ATOM   2814  CB  PRO B 156     -11.863  -5.222   2.059  1.00 66.79           C  
ATOM   2815  O   PRO B 156     -11.186  -5.920  -0.891  1.00 66.79           O  
ATOM   2816  CG  PRO B 156     -12.145  -6.354   2.993  1.00 66.79           C  
ATOM   2817  CD  PRO B 156     -12.586  -7.541   2.186  1.00 66.79           C  
ATOM   2818  N   PHE B 157     -12.522  -4.022  -1.088  1.00 64.34           N  
ATOM   2819  CA  PHE B 157     -11.925  -3.400  -2.264  1.00 64.34           C  
ATOM   2820  C   PHE B 157     -12.074  -4.298  -3.486  1.00 64.34           C  
ATOM   2821  CB  PHE B 157     -10.446  -3.089  -2.017  1.00 64.34           C  
ATOM   2822  O   PHE B 157     -11.410  -4.086  -4.503  1.00 64.34           O  
ATOM   2823  CG  PHE B 157     -10.208  -2.119  -0.891  1.00 64.34           C  
ATOM   2824  CD1 PHE B 157     -10.478  -0.766  -1.052  1.00 64.34           C  
ATOM   2825  CD2 PHE B 157      -9.716  -2.562   0.330  1.00 64.34           C  
ATOM   2826  CE1 PHE B 157     -10.259   0.134  -0.012  1.00 64.34           C  
ATOM   2827  CE2 PHE B 157      -9.495  -1.669   1.374  1.00 64.34           C  
ATOM   2828  CZ  PHE B 157      -9.766  -0.321   1.201  1.00 64.34           C  
ATOM   2829  N   TYR B 158     -12.643  -5.477  -3.284  1.00 69.24           N  
ATOM   2830  CA  TYR B 158     -12.922  -6.291  -4.462  1.00 69.24           C  
ATOM   2831  C   TYR B 158     -13.995  -5.644  -5.330  1.00 69.24           C  
ATOM   2832  CB  TYR B 158     -13.362  -7.699  -4.050  1.00 69.24           C  
ATOM   2833  O   TYR B 158     -15.079  -5.313  -4.844  1.00 69.24           O  
ATOM   2834  CG  TYR B 158     -13.668  -8.605  -5.218  1.00 69.24           C  
ATOM   2835  CD1 TYR B 158     -14.981  -8.830  -5.626  1.00 69.24           C  
ATOM   2836  CD2 TYR B 158     -12.645  -9.239  -5.915  1.00 69.24           C  
ATOM   2837  CE1 TYR B 158     -15.267  -9.666  -6.701  1.00 69.24           C  
ATOM   2838  CE2 TYR B 158     -12.919 -10.077  -6.991  1.00 69.24           C  
ATOM   2839  OH  TYR B 158     -14.509 -11.111  -8.441  1.00 69.24           O  
ATOM   2840  CZ  TYR B 158     -14.231 -10.283  -7.376  1.00 69.24           C  
ATOM   2841  N   ARG B 159     -13.486  -5.416  -6.712  1.00 66.84           N  
ATOM   2842  CA  ARG B 159     -14.432  -5.007  -7.745  1.00 66.84           C  
ATOM   2843  C   ARG B 159     -14.503  -6.041  -8.864  1.00 66.84           C  
ATOM   2844  CB  ARG B 159     -14.047  -3.642  -8.317  1.00 66.84           C  
ATOM   2845  O   ARG B 159     -13.476  -6.580  -9.284  1.00 66.84           O  
ATOM   2846  CG  ARG B 159     -14.083  -2.514  -7.298  1.00 66.84           C  
ATOM   2847  CD  ARG B 159     -13.660  -1.186  -7.910  1.00 66.84           C  
ATOM   2848  NE  ARG B 159     -14.627  -0.714  -8.897  1.00 66.84           N  
ATOM   2849  NH1 ARG B 159     -13.393   1.133  -9.529  1.00 66.84           N  
ATOM   2850  NH2 ARG B 159     -15.422   0.715 -10.510  1.00 66.84           N  
ATOM   2851  CZ  ARG B 159     -14.478   0.377  -9.643  1.00 66.84           C  
ATOM   2852  N   GLY B 160     -15.569  -6.751  -9.093  1.00 58.04           N  
ATOM   2853  CA  GLY B 160     -15.692  -7.688 -10.198  1.00 58.04           C  
ATOM   2854  C   GLY B 160     -15.155  -7.142 -11.507  1.00 58.04           C  
ATOM   2855  O   GLY B 160     -14.871  -5.947 -11.617  1.00 58.04           O  
ATOM   2856  N   ASP B 161     -14.617  -8.037 -12.436  1.00 50.91           N  
ATOM   2857  CA  ASP B 161     -13.999  -7.768 -13.731  1.00 50.91           C  
ATOM   2858  C   ASP B 161     -14.881  -6.856 -14.581  1.00 50.91           C  
ATOM   2859  CB  ASP B 161     -13.723  -9.076 -14.475  1.00 50.91           C  
ATOM   2860  O   ASP B 161     -14.380  -5.956 -15.260  1.00 50.91           O  
ATOM   2861  CG  ASP B 161     -12.410  -9.723 -14.070  1.00 50.91           C  
ATOM   2862  OD1 ASP B 161     -11.523  -9.021 -13.538  1.00 50.91           O  
ATOM   2863  OD2 ASP B 161     -12.261 -10.945 -14.287  1.00 50.91           O  
ATOM   2864  N   SER B 162     -16.313  -6.985 -14.486  1.00 45.99           N  
ATOM   2865  CA  SER B 162     -17.201  -6.219 -15.353  1.00 45.99           C  
ATOM   2866  C   SER B 162     -17.501  -4.845 -14.762  1.00 45.99           C  
ATOM   2867  CB  SER B 162     -18.508  -6.978 -15.589  1.00 45.99           C  
ATOM   2868  O   SER B 162     -17.878  -3.921 -15.486  1.00 45.99           O  
ATOM   2869  OG  SER B 162     -18.326  -8.368 -15.382  1.00 45.99           O  
ATOM   2870  N   SER B 163     -17.112  -4.579 -13.478  1.00 39.05           N  
ATOM   2871  CA  SER B 163     -17.371  -3.353 -12.729  1.00 39.05           C  
ATOM   2872  C   SER B 163     -16.137  -2.457 -12.693  1.00 39.05           C  
ATOM   2873  CB  SER B 163     -17.815  -3.680 -11.303  1.00 39.05           C  
ATOM   2874  O   SER B 163     -16.145  -1.406 -12.048  1.00 39.05           O  
ATOM   2875  OG  SER B 163     -18.800  -4.699 -11.304  1.00 39.05           O  
ATOM   2876  N   ARG B 164     -15.040  -2.912 -13.407  1.00 42.15           N  
ATOM   2877  CA  ARG B 164     -13.917  -1.981 -13.450  1.00 42.15           C  
ATOM   2878  C   ARG B 164     -14.195  -0.833 -14.415  1.00 42.15           C  
ATOM   2879  CB  ARG B 164     -12.632  -2.706 -13.854  1.00 42.15           C  
ATOM   2880  O   ARG B 164     -13.320  -0.002 -14.668  1.00 42.15           O  
ATOM   2881  CG  ARG B 164     -11.955  -3.445 -12.711  1.00 42.15           C  
ATOM   2882  CD  ARG B 164     -10.660  -4.109 -13.156  1.00 42.15           C  
ATOM   2883  NE  ARG B 164     -10.061  -4.896 -12.082  1.00 42.15           N  
ATOM   2884  NH1 ARG B 164      -8.105  -5.349 -13.225  1.00 42.15           N  
ATOM   2885  NH2 ARG B 164      -8.413  -6.162 -11.103  1.00 42.15           N  
ATOM   2886  CZ  ARG B 164      -8.861  -5.467 -12.139  1.00 42.15           C  
ATOM   2887  N   ASN B 165     -15.444  -0.930 -15.126  1.00 41.50           N  
ATOM   2888  CA  ASN B 165     -15.753   0.241 -15.940  1.00 41.50           C  
ATOM   2889  C   ASN B 165     -15.977   1.480 -15.077  1.00 41.50           C  
ATOM   2890  CB  ASN B 165     -16.977  -0.024 -16.818  1.00 41.50           C  
ATOM   2891  O   ASN B 165     -16.774   1.451 -14.137  1.00 41.50           O  
ATOM   2892  CG  ASN B 165     -16.606  -0.415 -18.235  1.00 41.50           C  
ATOM   2893  ND2 ASN B 165     -17.588  -0.880 -18.998  1.00 41.50           N  
ATOM   2894  OD1 ASN B 165     -15.446  -0.301 -18.640  1.00 41.50           O  
ATOM   2895  N   ARG B 166     -15.035   2.020 -14.359  1.00 47.48           N  
ATOM   2896  CA  ARG B 166     -14.662   3.224 -13.623  1.00 47.48           C  
ATOM   2897  C   ARG B 166     -15.823   4.211 -13.563  1.00 47.48           C  
ATOM   2898  CB  ARG B 166     -13.441   3.889 -14.262  1.00 47.48           C  
ATOM   2899  O   ARG B 166     -15.857   5.085 -12.695  1.00 47.48           O  
ATOM   2900  CG  ARG B 166     -12.112   3.339 -13.771  1.00 47.48           C  
ATOM   2901  CD  ARG B 166     -10.933   4.031 -14.440  1.00 47.48           C  
ATOM   2902  NE  ARG B 166      -9.696   3.274 -14.269  1.00 47.48           N  
ATOM   2903  NH1 ARG B 166      -8.338   4.883 -15.221  1.00 47.48           N  
ATOM   2904  NH2 ARG B 166      -7.432   2.926 -14.442  1.00 47.48           N  
ATOM   2905  CZ  ARG B 166      -8.491   3.696 -14.644  1.00 47.48           C  
ATOM   2906  N   ASP B 167     -16.858   4.125 -14.510  1.00 44.78           N  
ATOM   2907  CA  ASP B 167     -17.942   5.094 -14.385  1.00 44.78           C  
ATOM   2908  C   ASP B 167     -18.910   4.695 -13.273  1.00 44.78           C  
ATOM   2909  CB  ASP B 167     -18.693   5.234 -15.711  1.00 44.78           C  
ATOM   2910  O   ASP B 167     -19.638   5.537 -12.745  1.00 44.78           O  
ATOM   2911  CG  ASP B 167     -17.994   6.155 -16.694  1.00 44.78           C  
ATOM   2912  OD1 ASP B 167     -17.196   7.015 -16.263  1.00 44.78           O  
ATOM   2913  OD2 ASP B 167     -18.245   6.022 -17.912  1.00 44.78           O  
ATOM   2914  N   THR B 168     -18.833   3.455 -12.765  1.00 47.92           N  
ATOM   2915  CA  THR B 168     -19.776   3.151 -11.694  1.00 47.92           C  
ATOM   2916  C   THR B 168     -19.103   3.274 -10.330  1.00 47.92           C  
ATOM   2917  CB  THR B 168     -20.365   1.738 -11.853  1.00 47.92           C  
ATOM   2918  O   THR B 168     -19.740   3.059  -9.296  1.00 47.92           O  
ATOM   2919  CG2 THR B 168     -21.201   1.630 -13.125  1.00 47.92           C  
ATOM   2920  OG1 THR B 168     -19.297   0.785 -11.916  1.00 47.92           O  
ATOM   2921  N   GLY B 169     -17.867   4.042 -10.158  1.00 45.40           N  
ATOM   2922  CA  GLY B 169     -17.152   4.736  -9.099  1.00 45.40           C  
ATOM   2923  C   GLY B 169     -17.430   4.168  -7.720  1.00 45.40           C  
ATOM   2924  O   GLY B 169     -17.640   4.919  -6.765  1.00 45.40           O  
ATOM   2925  N   GLY B 170     -17.338   2.806  -7.447  1.00 58.52           N  
ATOM   2926  CA  GLY B 170     -17.353   2.436  -6.041  1.00 58.52           C  
ATOM   2927  C   GLY B 170     -16.012   1.929  -5.544  1.00 58.52           C  
ATOM   2928  O   GLY B 170     -15.113   1.653  -6.340  1.00 58.52           O  
ATOM   2929  N   THR B 171     -15.625   2.186  -4.173  1.00 61.99           N  
ATOM   2930  CA  THR B 171     -14.376   1.846  -3.500  1.00 61.99           C  
ATOM   2931  C   THR B 171     -14.253   0.336  -3.319  1.00 61.99           C  
ATOM   2932  CB  THR B 171     -14.273   2.541  -2.129  1.00 61.99           C  
ATOM   2933  O   THR B 171     -13.146  -0.190  -3.186  1.00 61.99           O  
ATOM   2934  CG2 THR B 171     -14.344   4.057  -2.275  1.00 61.99           C  
ATOM   2935  OG1 THR B 171     -15.352   2.101  -1.295  1.00 61.99           O  
ATOM   2936  N   GLY B 172     -15.385  -0.474  -3.577  1.00 70.04           N  
ATOM   2937  CA  GLY B 172     -15.373  -1.899  -3.287  1.00 70.04           C  
ATOM   2938  C   GLY B 172     -15.439  -2.206  -1.803  1.00 70.04           C  
ATOM   2939  O   GLY B 172     -15.241  -3.351  -1.391  1.00 70.04           O  
ATOM   2940  N   LEU B 173     -15.725  -1.182  -0.998  1.00 70.87           N  
ATOM   2941  CA  LEU B 173     -15.788  -1.386   0.445  1.00 70.87           C  
ATOM   2942  C   LEU B 173     -17.235  -1.477   0.918  1.00 70.87           C  
ATOM   2943  CB  LEU B 173     -15.069  -0.251   1.178  1.00 70.87           C  
ATOM   2944  O   LEU B 173     -17.500  -1.932   2.033  1.00 70.87           O  
ATOM   2945  CG  LEU B 173     -13.553  -0.393   1.325  1.00 70.87           C  
ATOM   2946  CD1 LEU B 173     -12.920   0.964   1.618  1.00 70.87           C  
ATOM   2947  CD2 LEU B 173     -13.213  -1.395   2.423  1.00 70.87           C  
ATOM   2948  N   GLY B 174     -18.116  -1.086   0.091  1.00 79.15           N  
ATOM   2949  CA  GLY B 174     -19.504  -0.931   0.497  1.00 79.15           C  
ATOM   2950  C   GLY B 174     -20.093  -2.191   1.102  1.00 79.15           C  
ATOM   2951  O   GLY B 174     -20.503  -2.195   2.265  1.00 79.15           O  
ATOM   2952  N   LEU B 175     -20.016  -3.356   0.352  1.00 86.70           N  
ATOM   2953  CA  LEU B 175     -20.634  -4.599   0.800  1.00 86.70           C  
ATOM   2954  C   LEU B 175     -19.871  -5.191   1.980  1.00 86.70           C  
ATOM   2955  CB  LEU B 175     -20.690  -5.613  -0.346  1.00 86.70           C  
ATOM   2956  O   LEU B 175     -20.462  -5.849   2.839  1.00 86.70           O  
ATOM   2957  CG  LEU B 175     -21.754  -5.367  -1.417  1.00 86.70           C  
ATOM   2958  CD1 LEU B 175     -21.594  -6.362  -2.562  1.00 86.70           C  
ATOM   2959  CD2 LEU B 175     -23.152  -5.458  -0.814  1.00 86.70           C  
ATOM   2960  N   ALA B 176     -18.603  -4.937   1.981  1.00 81.29           N  
ATOM   2961  CA  ALA B 176     -17.807  -5.376   3.124  1.00 81.29           C  
ATOM   2962  C   ALA B 176     -18.263  -4.688   4.407  1.00 81.29           C  
ATOM   2963  CB  ALA B 176     -16.325  -5.105   2.876  1.00 81.29           C  
ATOM   2964  O   ALA B 176     -18.380  -5.328   5.455  1.00 81.29           O  
ATOM   2965  N   ILE B 177     -18.521  -3.357   4.285  1.00 79.44           N  
ATOM   2966  CA  ILE B 177     -18.994  -2.567   5.417  1.00 79.44           C  
ATOM   2967  C   ILE B 177     -20.370  -3.063   5.853  1.00 79.44           C  
ATOM   2968  CB  ILE B 177     -19.051  -1.062   5.070  1.00 79.44           C  
ATOM   2969  O   ILE B 177     -20.628  -3.226   7.048  1.00 79.44           O  
ATOM   2970  CG1 ILE B 177     -17.636  -0.500   4.896  1.00 79.44           C  
ATOM   2971  CG2 ILE B 177     -19.820  -0.289   6.146  1.00 79.44           C  
ATOM   2972  CD1 ILE B 177     -17.597   0.917   4.340  1.00 79.44           C  
ATOM   2973  N   VAL B 178     -21.158  -3.397   4.876  1.00 88.07           N  
ATOM   2974  CA  VAL B 178     -22.511  -3.873   5.145  1.00 88.07           C  
ATOM   2975  C   VAL B 178     -22.452  -5.190   5.917  1.00 88.07           C  
ATOM   2976  CB  VAL B 178     -23.318  -4.056   3.841  1.00 88.07           C  
ATOM   2977  O   VAL B 178     -23.138  -5.355   6.928  1.00 88.07           O  
ATOM   2978  CG1 VAL B 178     -24.686  -4.671   4.134  1.00 88.07           C  
ATOM   2979  CG2 VAL B 178     -23.474  -2.719   3.119  1.00 88.07           C  
ATOM   2980  N   ARG B 179     -21.666  -6.097   5.463  1.00 88.13           N  
ATOM   2981  CA  ARG B 179     -21.539  -7.399   6.111  1.00 88.13           C  
ATOM   2982  C   ARG B 179     -21.033  -7.251   7.542  1.00 88.13           C  
ATOM   2983  CB  ARG B 179     -20.601  -8.308   5.314  1.00 88.13           C  
ATOM   2984  O   ARG B 179     -21.545  -7.899   8.457  1.00 88.13           O  
ATOM   2985  CG  ARG B 179     -20.538  -9.735   5.834  1.00 88.13           C  
ATOM   2986  CD  ARG B 179     -19.835 -10.662   4.852  1.00 88.13           C  
ATOM   2987  NE  ARG B 179     -18.404 -10.383   4.776  1.00 88.13           N  
ATOM   2988  NH1 ARG B 179     -17.937 -12.098   3.300  1.00 88.13           N  
ATOM   2989  NH2 ARG B 179     -16.255 -10.731   4.047  1.00 88.13           N  
ATOM   2990  CZ  ARG B 179     -17.535 -11.071   4.041  1.00 88.13           C  
ATOM   2991  N   SER B 180     -20.096  -6.445   7.653  1.00 80.70           N  
ATOM   2992  CA  SER B 180     -19.525  -6.217   8.977  1.00 80.70           C  
ATOM   2993  C   SER B 180     -20.577  -5.697   9.951  1.00 80.70           C  
ATOM   2994  CB  SER B 180     -18.361  -5.228   8.896  1.00 80.70           C  
ATOM   2995  O   SER B 180     -20.674  -6.178  11.082  1.00 80.70           O  
ATOM   2996  OG  SER B 180     -17.855  -4.939  10.188  1.00 80.70           O  
ATOM   2997  N   ILE B 181     -21.391  -4.708   9.495  1.00 85.17           N  
ATOM   2998  CA  ILE B 181     -22.416  -4.079  10.321  1.00 85.17           C  
ATOM   2999  C   ILE B 181     -23.498  -5.099  10.667  1.00 85.17           C  
ATOM   3000  CB  ILE B 181     -23.039  -2.855   9.614  1.00 85.17           C  
ATOM   3001  O   ILE B 181     -23.919  -5.200  11.822  1.00 85.17           O  
ATOM   3002  CG1 ILE B 181     -22.026  -1.707   9.542  1.00 85.17           C  
ATOM   3003  CG2 ILE B 181     -24.319  -2.413  10.329  1.00 85.17           C  
ATOM   3004  CD1 ILE B 181     -22.485  -0.529   8.692  1.00 85.17           C  
ATOM   3005  N   VAL B 182     -23.866  -5.858   9.723  1.00 89.54           N  
ATOM   3006  CA  VAL B 182     -24.929  -6.841   9.900  1.00 89.54           C  
ATOM   3007  C   VAL B 182     -24.477  -7.919  10.883  1.00 89.54           C  
ATOM   3008  CB  VAL B 182     -25.339  -7.483   8.556  1.00 89.54           C  
ATOM   3009  O   VAL B 182     -25.222  -8.289  11.794  1.00 89.54           O  
ATOM   3010  CG1 VAL B 182     -26.291  -8.655   8.785  1.00 89.54           C  
ATOM   3011  CG2 VAL B 182     -25.980  -6.441   7.641  1.00 89.54           C  
ATOM   3012  N   ARG B 183     -23.286  -8.334  10.778  1.00 88.18           N  
ATOM   3013  CA  ARG B 183     -22.750  -9.367  11.657  1.00 88.18           C  
ATOM   3014  C   ARG B 183     -22.589  -8.845  13.081  1.00 88.18           C  
ATOM   3015  CB  ARG B 183     -21.407  -9.878  11.131  1.00 88.18           C  
ATOM   3016  O   ARG B 183     -22.761  -9.593  14.046  1.00 88.18           O  
ATOM   3017  CG  ARG B 183     -21.527 -10.793   9.923  1.00 88.18           C  
ATOM   3018  CD  ARG B 183     -20.184 -11.398   9.538  1.00 88.18           C  
ATOM   3019  NE  ARG B 183     -20.324 -12.393   8.479  1.00 88.18           N  
ATOM   3020  NH1 ARG B 183     -18.055 -12.739   8.219  1.00 88.18           N  
ATOM   3021  NH2 ARG B 183     -19.551 -13.896   6.924  1.00 88.18           N  
ATOM   3022  CZ  ARG B 183     -19.310 -13.007   7.876  1.00 88.18           C  
ATOM   3023  N   ALA B 184     -22.183  -7.571  13.150  1.00 82.09           N  
ATOM   3024  CA  ALA B 184     -22.042  -6.951  14.464  1.00 82.09           C  
ATOM   3025  C   ALA B 184     -23.375  -6.931  15.208  1.00 82.09           C  
ATOM   3026  CB  ALA B 184     -21.492  -5.533  14.327  1.00 82.09           C  
ATOM   3027  O   ALA B 184     -23.405  -6.868  16.439  1.00 82.09           O  
ATOM   3028  N   HIS B 185     -24.426  -6.954  14.497  1.00 88.72           N  
ATOM   3029  CA  HIS B 185     -25.761  -6.984  15.083  1.00 88.72           C  
ATOM   3030  C   HIS B 185     -26.236  -8.416  15.301  1.00 88.72           C  
ATOM   3031  CB  HIS B 185     -26.754  -6.231  14.195  1.00 88.72           C  
ATOM   3032  O   HIS B 185     -27.389  -8.643  15.674  1.00 88.72           O  
ATOM   3033  CG  HIS B 185     -26.623  -4.743  14.276  1.00 88.72           C  
ATOM   3034  CD2 HIS B 185     -27.335  -3.825  14.971  1.00 88.72           C  
ATOM   3035  ND1 HIS B 185     -25.663  -4.042  13.579  1.00 88.72           N  
ATOM   3036  CE1 HIS B 185     -25.790  -2.752  13.843  1.00 88.72           C  
ATOM   3037  NE2 HIS B 185     -26.797  -2.594  14.685  1.00 88.72           N  
ATOM   3038  N   GLY B 186     -25.315  -9.367  14.998  1.00 87.59           N  
ATOM   3039  CA  GLY B 186     -25.655 -10.773  15.146  1.00 87.59           C  
ATOM   3040  C   GLY B 186     -26.433 -11.326  13.967  1.00 87.59           C  
ATOM   3041  O   GLY B 186     -27.085 -12.366  14.079  1.00 87.59           O  
ATOM   3042  N   GLY B 187     -26.487 -10.603  12.906  1.00 91.95           N  
ATOM   3043  CA  GLY B 187     -27.216 -11.014  11.717  1.00 91.95           C  
ATOM   3044  C   GLY B 187     -26.322 -11.603  10.642  1.00 91.95           C  
ATOM   3045  O   GLY B 187     -25.181 -11.981  10.916  1.00 91.95           O  
ATOM   3046  N   ASP B 188     -27.032 -11.767   9.438  1.00 94.34           N  
ATOM   3047  CA  ASP B 188     -26.333 -12.309   8.276  1.00 94.34           C  
ATOM   3048  C   ASP B 188     -26.794 -11.626   6.991  1.00 94.34           C  
ATOM   3049  CB  ASP B 188     -26.550 -13.820   8.177  1.00 94.34           C  
ATOM   3050  O   ASP B 188     -27.882 -11.048   6.944  1.00 94.34           O  
ATOM   3051  CG  ASP B 188     -25.481 -14.520   7.356  1.00 94.34           C  
ATOM   3052  OD1 ASP B 188     -24.449 -13.891   7.035  1.00 94.34           O  
ATOM   3053  OD2 ASP B 188     -25.673 -15.710   7.025  1.00 94.34           O  
ATOM   3054  N   ILE B 189     -25.864 -11.651   6.004  1.00 94.97           N  
ATOM   3055  CA  ILE B 189     -26.186 -11.067   4.706  1.00 94.97           C  
ATOM   3056  C   ILE B 189     -25.917 -12.085   3.601  1.00 94.97           C  
ATOM   3057  CB  ILE B 189     -25.379  -9.774   4.452  1.00 94.97           C  
ATOM   3058  O   ILE B 189     -24.903 -12.787   3.628  1.00 94.97           O  
ATOM   3059  CG1 ILE B 189     -25.744  -9.176   3.088  1.00 94.97           C  
ATOM   3060  CG2 ILE B 189     -23.875 -10.049   4.545  1.00 94.97           C  
ATOM   3061  CD1 ILE B 189     -25.179  -7.782   2.852  1.00 94.97           C  
ATOM   3062  N   THR B 190     -26.847 -12.191   2.632  1.00 94.68           N  
ATOM   3063  CA  THR B 190     -26.690 -13.112   1.511  1.00 94.68           C  
ATOM   3064  C   THR B 190     -27.025 -12.420   0.193  1.00 94.68           C  
ATOM   3065  CB  THR B 190     -27.581 -14.356   1.682  1.00 94.68           C  
ATOM   3066  O   THR B 190     -27.868 -11.522   0.153  1.00 94.68           O  
ATOM   3067  CG2 THR B 190     -27.152 -15.178   2.893  1.00 94.68           C  
ATOM   3068  OG1 THR B 190     -28.941 -13.943   1.857  1.00 94.68           O  
ATOM   3069  N   LEU B 191     -26.283 -12.853  -0.872  1.00 94.54           N  
ATOM   3070  CA  LEU B 191     -26.509 -12.345  -2.221  1.00 94.54           C  
ATOM   3071  C   LEU B 191     -26.969 -13.461  -3.152  1.00 94.54           C  
ATOM   3072  CB  LEU B 191     -25.234 -11.699  -2.770  1.00 94.54           C  
ATOM   3073  O   LEU B 191     -26.447 -14.577  -3.097  1.00 94.54           O  
ATOM   3074  CG  LEU B 191     -24.752 -10.436  -2.056  1.00 94.54           C  
ATOM   3075  CD1 LEU B 191     -23.294 -10.588  -1.635  1.00 94.54           C  
ATOM   3076  CD2 LEU B 191     -24.930  -9.214  -2.951  1.00 94.54           C  
ATOM   3077  N   GLU B 192     -27.946 -13.153  -3.975  1.00 93.94           N  
ATOM   3078  CA  GLU B 192     -28.395 -14.083  -5.006  1.00 93.94           C  
ATOM   3079  C   GLU B 192     -28.828 -13.342  -6.268  1.00 93.94           C  
ATOM   3080  CB  GLU B 192     -29.544 -14.950  -4.485  1.00 93.94           C  
ATOM   3081  O   GLU B 192     -29.371 -12.238  -6.189  1.00 93.94           O  
ATOM   3082  CG  GLU B 192     -30.797 -14.163  -4.132  1.00 93.94           C  
ATOM   3083  CD  GLU B 192     -31.920 -15.034  -3.590  1.00 93.94           C  
ATOM   3084  OE1 GLU B 192     -33.016 -14.501  -3.304  1.00 93.94           O  
ATOM   3085  OE2 GLU B 192     -31.701 -16.258  -3.450  1.00 93.94           O  
ATOM   3086  N   ASN B 193     -28.517 -14.052  -7.430  1.00 92.74           N  
ATOM   3087  CA  ASN B 193     -29.009 -13.483  -8.680  1.00 92.74           C  
ATOM   3088  C   ASN B 193     -30.486 -13.800  -8.897  1.00 92.74           C  
ATOM   3089  CB  ASN B 193     -28.178 -13.986  -9.863  1.00 92.74           C  
ATOM   3090  O   ASN B 193     -30.931 -14.918  -8.634  1.00 92.74           O  
ATOM   3091  CG  ASN B 193     -26.796 -13.365  -9.912  1.00 92.74           C  
ATOM   3092  ND2 ASN B 193     -25.794 -14.175 -10.232  1.00 92.74           N  
ATOM   3093  OD1 ASN B 193     -26.631 -12.168  -9.663  1.00 92.74           O  
ATOM   3094  N   ARG B 194     -31.211 -12.831  -9.487  1.00 90.51           N  
ATOM   3095  CA  ARG B 194     -32.632 -13.021  -9.759  1.00 90.51           C  
ATOM   3096  C   ARG B 194     -32.846 -13.687 -11.114  1.00 90.51           C  
ATOM   3097  CB  ARG B 194     -33.373 -11.684  -9.709  1.00 90.51           C  
ATOM   3098  O   ARG B 194     -32.061 -13.482 -12.043  1.00 90.51           O  
ATOM   3099  CG  ARG B 194     -33.381 -11.035  -8.334  1.00 90.51           C  
ATOM   3100  CD  ARG B 194     -34.063  -9.674  -8.356  1.00 90.51           C  
ATOM   3101  NE  ARG B 194     -35.452  -9.774  -8.795  1.00 90.51           N  
ATOM   3102  NH1 ARG B 194     -35.665  -7.534  -9.318  1.00 90.51           N  
ATOM   3103  NH2 ARG B 194     -37.436  -8.958  -9.616  1.00 90.51           N  
ATOM   3104  CZ  ARG B 194     -36.181  -8.755  -9.242  1.00 90.51           C  
ATOM   3105  N   PRO B 195     -33.874 -14.599 -11.220  1.00 81.60           N  
ATOM   3106  CA  PRO B 195     -34.171 -15.290 -12.477  1.00 81.60           C  
ATOM   3107  C   PRO B 195     -34.440 -14.326 -13.631  1.00 81.60           C  
ATOM   3108  CB  PRO B 195     -35.422 -16.106 -12.143  1.00 81.60           C  
ATOM   3109  O   PRO B 195     -34.067 -14.605 -14.773  1.00 81.60           O  
ATOM   3110  CG  PRO B 195     -35.538 -16.036 -10.655  1.00 81.60           C  
ATOM   3111  CD  PRO B 195     -34.673 -14.912 -10.161  1.00 81.60           C  
ATOM   3112  N   GLY B 196     -34.851 -13.097 -13.480  1.00 76.81           N  
ATOM   3113  CA  GLY B 196     -35.259 -12.123 -14.480  1.00 76.81           C  
ATOM   3114  C   GLY B 196     -34.224 -11.038 -14.713  1.00 76.81           C  
ATOM   3115  O   GLY B 196     -34.444 -10.124 -15.511  1.00 76.81           O  
ATOM   3116  N   GLY B 197     -33.028 -11.300 -14.137  1.00 83.21           N  
ATOM   3117  CA  GLY B 197     -31.986 -10.288 -14.212  1.00 83.21           C  
ATOM   3118  C   GLY B 197     -31.986  -9.343 -13.025  1.00 83.21           C  
ATOM   3119  O   GLY B 197     -33.041  -9.052 -12.456  1.00 83.21           O  
ATOM   3120  N   GLY B 198     -30.789  -9.168 -12.365  1.00 90.20           N  
ATOM   3121  CA  GLY B 198     -30.570  -8.308 -11.214  1.00 90.20           C  
ATOM   3122  C   GLY B 198     -29.977  -9.040 -10.026  1.00 90.20           C  
ATOM   3123  O   GLY B 198     -29.572 -10.199 -10.143  1.00 90.20           O  
ATOM   3124  N   LEU B 199     -29.923  -8.317  -8.959  1.00 93.61           N  
ATOM   3125  CA  LEU B 199     -29.311  -8.839  -7.742  1.00 93.61           C  
ATOM   3126  C   LEU B 199     -30.242  -8.663  -6.547  1.00 93.61           C  
ATOM   3127  CB  LEU B 199     -27.976  -8.141  -7.471  1.00 93.61           C  
ATOM   3128  O   LEU B 199     -30.887  -7.621  -6.405  1.00 93.61           O  
ATOM   3129  CG  LEU B 199     -27.172  -8.656  -6.276  1.00 93.61           C  
ATOM   3130  CD1 LEU B 199     -26.625 -10.049  -6.566  1.00 93.61           C  
ATOM   3131  CD2 LEU B 199     -26.040  -7.692  -5.937  1.00 93.61           C  
ATOM   3132  N   ARG B 200     -30.385  -9.776  -5.796  1.00 94.95           N  
ATOM   3133  CA  ARG B 200     -31.129  -9.729  -4.541  1.00 94.95           C  
ATOM   3134  C   ARG B 200     -30.194  -9.870  -3.344  1.00 94.95           C  
ATOM   3135  CB  ARG B 200     -32.195 -10.826  -4.506  1.00 94.95           C  
ATOM   3136  O   ARG B 200     -29.468 -10.859  -3.231  1.00 94.95           O  
ATOM   3137  CG  ARG B 200     -33.028 -10.835  -3.233  1.00 94.95           C  
ATOM   3138  CD  ARG B 200     -34.036 -11.976  -3.227  1.00 94.95           C  
ATOM   3139  NE  ARG B 200     -35.025 -11.827  -4.291  1.00 94.95           N  
ATOM   3140  NH1 ARG B 200     -35.256 -14.093  -4.676  1.00 94.95           N  
ATOM   3141  NH2 ARG B 200     -36.472 -12.587  -5.904  1.00 94.95           N  
ATOM   3142  CZ  ARG B 200     -35.582 -12.836  -4.955  1.00 94.95           C  
ATOM   3143  N   VAL B 201     -30.290  -8.801  -2.573  1.00 95.86           N  
ATOM   3144  CA  VAL B 201     -29.505  -8.822  -1.343  1.00 95.86           C  
ATOM   3145  C   VAL B 201     -30.435  -8.946  -0.138  1.00 95.86           C  
ATOM   3146  CB  VAL B 201     -28.627  -7.557  -1.210  1.00 95.86           C  
ATOM   3147  O   VAL B 201     -31.364  -8.151   0.022  1.00 95.86           O  
ATOM   3148  CG1 VAL B 201     -27.736  -7.647   0.028  1.00 95.86           C  
ATOM   3149  CG2 VAL B 201     -27.782  -7.361  -2.468  1.00 95.86           C  
ATOM   3150  N   ARG B 202     -30.075  -9.975   0.769  1.00 96.22           N  
ATOM   3151  CA  ARG B 202     -30.915 -10.216   1.938  1.00 96.22           C  
ATOM   3152  C   ARG B 202     -30.121 -10.040   3.229  1.00 96.22           C  
ATOM   3153  CB  ARG B 202     -31.523 -11.620   1.884  1.00 96.22           C  
ATOM   3154  O   ARG B 202     -29.089 -10.687   3.422  1.00 96.22           O  
ATOM   3155  CG  ARG B 202     -33.043 -11.631   1.845  1.00 96.22           C  
ATOM   3156  CD  ARG B 202     -33.596 -13.050   1.854  1.00 96.22           C  
ATOM   3157  NE  ARG B 202     -33.853 -13.536   0.501  1.00 96.22           N  
ATOM   3158  NH1 ARG B 202     -32.771 -15.555   0.800  1.00 96.22           N  
ATOM   3159  NH2 ARG B 202     -33.743 -15.057  -1.216  1.00 96.22           N  
ATOM   3160  CZ  ARG B 202     -33.455 -14.715   0.031  1.00 96.22           C  
ATOM   3161  N   ILE B 203     -30.669  -9.107   4.070  1.00 96.68           N  
ATOM   3162  CA  ILE B 203     -30.126  -8.924   5.411  1.00 96.68           C  
ATOM   3163  C   ILE B 203     -31.068  -9.547   6.439  1.00 96.68           C  
ATOM   3164  CB  ILE B 203     -29.898  -7.429   5.730  1.00 96.68           C  
ATOM   3165  O   ILE B 203     -32.267  -9.256   6.447  1.00 96.68           O  
ATOM   3166  CG1 ILE B 203     -28.856  -6.833   4.776  1.00 96.68           C  
ATOM   3167  CG2 ILE B 203     -29.472  -7.247   7.189  1.00 96.68           C  
ATOM   3168  CD1 ILE B 203     -28.662  -5.331   4.932  1.00 96.68           C  
ATOM   3169  N   THR B 204     -30.413 -10.399   7.308  1.00 94.87           N  
ATOM   3170  CA  THR B 204     -31.196 -10.980   8.393  1.00 94.87           C  
ATOM   3171  C   THR B 204     -30.682 -10.500   9.748  1.00 94.87           C  
ATOM   3172  CB  THR B 204     -31.162 -12.519   8.345  1.00 94.87           C  
ATOM   3173  O   THR B 204     -29.484 -10.576  10.026  1.00 94.87           O  
ATOM   3174  CG2 THR B 204     -31.907 -13.047   7.124  1.00 94.87           C  
ATOM   3175  OG1 THR B 204     -29.799 -12.959   8.286  1.00 94.87           O  
ATOM   3176  N   LEU B 205     -31.615  -9.937  10.522  1.00 93.31           N  
ATOM   3177  CA  LEU B 205     -31.268  -9.442  11.849  1.00 93.31           C  
ATOM   3178  C   LEU B 205     -32.092 -10.144  12.923  1.00 93.31           C  
ATOM   3179  CB  LEU B 205     -31.485  -7.928  11.931  1.00 93.31           C  
ATOM   3180  O   LEU B 205     -33.259 -10.474  12.700  1.00 93.31           O  
ATOM   3181  CG  LEU B 205     -30.632  -7.070  10.996  1.00 93.31           C  
ATOM   3182  CD1 LEU B 205     -31.128  -5.628  11.001  1.00 93.31           C  
ATOM   3183  CD2 LEU B 205     -29.163  -7.137  11.400  1.00 93.31           C  
ATOM   3184  N   PRO B 206     -31.404 -10.475  14.140  1.00 86.01           N  
ATOM   3185  CA  PRO B 206     -32.168 -11.058  15.245  1.00 86.01           C  
ATOM   3186  C   PRO B 206     -33.221 -10.103  15.804  1.00 86.01           C  
ATOM   3187  CB  PRO B 206     -31.095 -11.362  16.294  1.00 86.01           C  
ATOM   3188  O   PRO B 206     -33.146  -8.893  15.573  1.00 86.01           O  
ATOM   3189  CG  PRO B 206     -29.935 -10.500  15.914  1.00 86.01           C  
ATOM   3190  CD  PRO B 206     -30.078 -10.117  14.469  1.00 86.01           C  
TER
ATOM   3191  N   PRO C   1      17.337   1.781 -25.631  1.00 88.07           N  
ATOM   3192  CA  PRO C   1      16.852   0.551 -25.001  1.00 88.07           C  
ATOM   3193  C   PRO C   1      15.329   0.496 -24.908  1.00 88.07           C  
ATOM   3194  CB  PRO C   1      17.483   0.596 -23.607  1.00 88.07           C  
ATOM   3195  O   PRO C   1      14.675   1.537 -24.804  1.00 88.07           O  
ATOM   3196  CG  PRO C   1      18.625   1.552 -23.735  1.00 88.07           C  
ATOM   3197  CD  PRO C   1      18.270   2.583 -24.769  1.00 88.07           C  
ATOM   3198  N   ARG C   2      14.798  -0.590 -25.181  1.00 91.76           N  
ATOM   3199  CA  ARG C   2      13.355  -0.806 -25.131  1.00 91.76           C  
ATOM   3200  C   ARG C   2      12.929  -1.345 -23.770  1.00 91.76           C  
ATOM   3201  CB  ARG C   2      12.916  -1.768 -26.237  1.00 91.76           C  
ATOM   3202  O   ARG C   2      13.445  -2.366 -23.311  1.00 91.76           O  
ATOM   3203  CG  ARG C   2      11.408  -1.918 -26.361  1.00 91.76           C  
ATOM   3204  CD  ARG C   2      11.023  -2.765 -27.565  1.00 91.76           C  
ATOM   3205  NE  ARG C   2      11.186  -2.030 -28.816  1.00 91.76           N  
ATOM   3206  NH1 ARG C   2      10.455  -3.757 -30.166  1.00 91.76           N  
ATOM   3207  NH2 ARG C   2      11.099  -1.762 -31.095  1.00 91.76           N  
ATOM   3208  CZ  ARG C   2      10.913  -2.518 -30.023  1.00 91.76           C  
ATOM   3209  N   ILE C   3      12.000  -0.597 -23.184  1.00 97.09           N  
ATOM   3210  CA  ILE C   3      11.504  -0.988 -21.868  1.00 97.09           C  
ATOM   3211  C   ILE C   3      10.066  -1.487 -21.987  1.00 97.09           C  
ATOM   3212  CB  ILE C   3      11.583   0.184 -20.864  1.00 97.09           C  
ATOM   3213  O   ILE C   3       9.242  -0.871 -22.666  1.00 97.09           O  
ATOM   3214  CG1 ILE C   3      13.029   0.676 -20.731  1.00 97.09           C  
ATOM   3215  CG2 ILE C   3      11.019  -0.233 -19.503  1.00 97.09           C  
ATOM   3216  CD1 ILE C   3      13.213   1.789 -19.708  1.00 97.09           C  
ATOM   3217  N   LEU C   4       9.811  -2.612 -21.402  1.00 97.39           N  
ATOM   3218  CA  LEU C   4       8.443  -3.111 -21.311  1.00 97.39           C  
ATOM   3219  C   LEU C   4       7.856  -2.838 -19.930  1.00 97.39           C  
ATOM   3220  CB  LEU C   4       8.399  -4.612 -21.609  1.00 97.39           C  
ATOM   3221  O   LEU C   4       8.403  -3.283 -18.919  1.00 97.39           O  
ATOM   3222  CG  LEU C   4       7.039  -5.295 -21.455  1.00 97.39           C  
ATOM   3223  CD1 LEU C   4       6.034  -4.699 -22.435  1.00 97.39           C  
ATOM   3224  CD2 LEU C   4       7.169  -6.800 -21.663  1.00 97.39           C  
ATOM   3225  N   VAL C   5       6.778  -2.045 -19.876  1.00 97.74           N  
ATOM   3226  CA  VAL C   5       6.083  -1.747 -18.628  1.00 97.74           C  
ATOM   3227  C   VAL C   5       4.838  -2.624 -18.508  1.00 97.74           C  
ATOM   3228  CB  VAL C   5       5.694  -0.255 -18.537  1.00 97.74           C  
ATOM   3229  O   VAL C   5       3.935  -2.548 -19.343  1.00 97.74           O  
ATOM   3230  CG1 VAL C   5       4.909   0.022 -17.257  1.00 97.74           C  
ATOM   3231  CG2 VAL C   5       6.941   0.626 -18.604  1.00 97.74           C  
ATOM   3232  N   VAL C   6       4.815  -3.456 -17.459  1.00 95.99           N  
ATOM   3233  CA  VAL C   6       3.689  -4.355 -17.229  1.00 95.99           C  
ATOM   3234  C   VAL C   6       2.950  -3.942 -15.958  1.00 95.99           C  
ATOM   3235  CB  VAL C   6       4.149  -5.826 -17.123  1.00 95.99           C  
ATOM   3236  O   VAL C   6       3.464  -4.113 -14.850  1.00 95.99           O  
ATOM   3237  CG1 VAL C   6       2.946  -6.766 -17.065  1.00 95.99           C  
ATOM   3238  CG2 VAL C   6       5.056  -6.187 -18.298  1.00 95.99           C  
ATOM   3239  N   ASP C   7       1.769  -3.415 -16.118  1.00 93.08           N  
ATOM   3240  CA  ASP C   7       0.936  -2.944 -15.017  1.00 93.08           C  
ATOM   3241  C   ASP C   7      -0.546  -3.013 -15.380  1.00 93.08           C  
ATOM   3242  CB  ASP C   7       1.316  -1.513 -14.631  1.00 93.08           C  
ATOM   3243  O   ASP C   7      -0.927  -2.716 -16.514  1.00 93.08           O  
ATOM   3244  CG  ASP C   7       0.825  -1.121 -13.248  1.00 93.08           C  
ATOM   3245  OD1 ASP C   7      -0.404  -1.029 -13.041  1.00 93.08           O  
ATOM   3246  OD2 ASP C   7       1.676  -0.900 -12.359  1.00 93.08           O  
ATOM   3247  N   ASP C   8      -1.406  -3.466 -14.447  1.00 87.90           N  
ATOM   3248  CA  ASP C   8      -2.830  -3.624 -14.726  1.00 87.90           C  
ATOM   3249  C   ASP C   8      -3.544  -2.275 -14.719  1.00 87.90           C  
ATOM   3250  CB  ASP C   8      -3.476  -4.566 -13.707  1.00 87.90           C  
ATOM   3251  O   ASP C   8      -4.666  -2.157 -15.218  1.00 87.90           O  
ATOM   3252  CG  ASP C   8      -3.369  -4.060 -12.280  1.00 87.90           C  
ATOM   3253  OD1 ASP C   8      -2.255  -3.698 -11.843  1.00 87.90           O  
ATOM   3254  OD2 ASP C   8      -4.407  -4.024 -11.585  1.00 87.90           O  
ATOM   3255  N   ASP C   9      -2.837  -1.310 -14.109  1.00 89.48           N  
ATOM   3256  CA  ASP C   9      -3.440   0.019 -14.081  1.00 89.48           C  
ATOM   3257  C   ASP C   9      -3.094   0.806 -15.343  1.00 89.48           C  
ATOM   3258  CB  ASP C   9      -2.986   0.788 -12.839  1.00 89.48           C  
ATOM   3259  O   ASP C   9      -1.939   1.185 -15.547  1.00 89.48           O  
ATOM   3260  CG  ASP C   9      -3.715   2.108 -12.659  1.00 89.48           C  
ATOM   3261  OD1 ASP C   9      -3.630   2.979 -13.551  1.00 89.48           O  
ATOM   3262  OD2 ASP C   9      -4.380   2.279 -11.614  1.00 89.48           O  
ATOM   3263  N   PRO C  10      -4.084   1.156 -16.237  1.00 91.00           N  
ATOM   3264  CA  PRO C  10      -3.823   1.814 -17.520  1.00 91.00           C  
ATOM   3265  C   PRO C  10      -3.200   3.199 -17.357  1.00 91.00           C  
ATOM   3266  CB  PRO C  10      -5.212   1.911 -18.156  1.00 91.00           C  
ATOM   3267  O   PRO C  10      -2.365   3.603 -18.169  1.00 91.00           O  
ATOM   3268  CG  PRO C  10      -6.165   1.811 -17.009  1.00 91.00           C  
ATOM   3269  CD  PRO C  10      -5.549   0.940 -15.951  1.00 91.00           C  
ATOM   3270  N   GLU C  11      -3.532   3.874 -16.276  1.00 91.25           N  
ATOM   3271  CA  GLU C  11      -3.001   5.218 -16.065  1.00 91.25           C  
ATOM   3272  C   GLU C  11      -1.520   5.175 -15.697  1.00 91.25           C  
ATOM   3273  CB  GLU C  11      -3.793   5.944 -14.976  1.00 91.25           C  
ATOM   3274  O   GLU C  11      -0.726   5.970 -16.203  1.00 91.25           O  
ATOM   3275  CG  GLU C  11      -5.142   6.470 -15.444  1.00 91.25           C  
ATOM   3276  CD  GLU C  11      -5.802   7.406 -14.443  1.00 91.25           C  
ATOM   3277  OE1 GLU C  11      -6.954   7.835 -14.681  1.00 91.25           O  
ATOM   3278  OE2 GLU C  11      -5.161   7.714 -13.414  1.00 91.25           O  
ATOM   3279  N   ILE C  12      -1.237   4.272 -14.780  1.00 93.54           N  
ATOM   3280  CA  ILE C  12       0.157   4.118 -14.379  1.00 93.54           C  
ATOM   3281  C   ILE C  12       1.001   3.722 -15.588  1.00 93.54           C  
ATOM   3282  CB  ILE C  12       0.309   3.070 -13.253  1.00 93.54           C  
ATOM   3283  O   ILE C  12       2.088   4.266 -15.800  1.00 93.54           O  
ATOM   3284  CG1 ILE C  12      -0.277   3.606 -11.942  1.00 93.54           C  
ATOM   3285  CG2 ILE C  12       1.779   2.677 -13.076  1.00 93.54           C  
ATOM   3286  CD1 ILE C  12      -0.211   2.619 -10.785  1.00 93.54           C  
ATOM   3287  N   ARG C  13       0.449   2.809 -16.451  1.00 94.80           N  
ATOM   3288  CA  ARG C  13       1.161   2.408 -17.660  1.00 94.80           C  
ATOM   3289  C   ARG C  13       1.399   3.602 -18.578  1.00 94.80           C  
ATOM   3290  CB  ARG C  13       0.385   1.320 -18.406  1.00 94.80           C  
ATOM   3291  O   ARG C  13       2.504   3.787 -19.091  1.00 94.80           O  
ATOM   3292  CG  ARG C  13       0.401  -0.033 -17.712  1.00 94.80           C  
ATOM   3293  CD  ARG C  13       0.050  -1.162 -18.671  1.00 94.80           C  
ATOM   3294  NE  ARG C  13      -1.202  -0.901 -19.377  1.00 94.80           N  
ATOM   3295  NH1 ARG C  13      -2.554  -1.820 -17.745  1.00 94.80           N  
ATOM   3296  NH2 ARG C  13      -3.482  -0.935 -19.645  1.00 94.80           N  
ATOM   3297  CZ  ARG C  13      -2.410  -1.219 -18.921  1.00 94.80           C  
ATOM   3298  N   ASP C  14       0.384   4.332 -18.735  1.00 94.89           N  
ATOM   3299  CA  ASP C  14       0.464   5.496 -19.612  1.00 94.89           C  
ATOM   3300  C   ASP C  14       1.454   6.524 -19.070  1.00 94.89           C  
ATOM   3301  CB  ASP C  14      -0.915   6.134 -19.785  1.00 94.89           C  
ATOM   3302  O   ASP C  14       2.280   7.053 -19.817  1.00 94.89           O  
ATOM   3303  CG  ASP C  14      -0.906   7.318 -20.736  1.00 94.89           C  
ATOM   3304  OD1 ASP C  14      -0.622   7.131 -21.939  1.00 94.89           O  
ATOM   3305  OD2 ASP C  14      -1.182   8.447 -20.278  1.00 94.89           O  
ATOM   3306  N   LEU C  15       1.392   6.790 -17.760  1.00 95.41           N  
ATOM   3307  CA  LEU C  15       2.264   7.777 -17.133  1.00 95.41           C  
ATOM   3308  C   LEU C  15       3.719   7.325 -17.181  1.00 95.41           C  
ATOM   3309  CB  LEU C  15       1.841   8.022 -15.683  1.00 95.41           C  
ATOM   3310  O   LEU C  15       4.612   8.121 -17.478  1.00 95.41           O  
ATOM   3311  CG  LEU C  15       0.566   8.842 -15.478  1.00 95.41           C  
ATOM   3312  CD1 LEU C  15       0.085   8.722 -14.035  1.00 95.41           C  
ATOM   3313  CD2 LEU C  15       0.803  10.302 -15.847  1.00 95.41           C  
ATOM   3314  N   LEU C  16       3.962   6.082 -16.893  1.00 97.05           N  
ATOM   3315  CA  LEU C  16       5.316   5.543 -16.958  1.00 97.05           C  
ATOM   3316  C   LEU C  16       5.852   5.594 -18.385  1.00 97.05           C  
ATOM   3317  CB  LEU C  16       5.346   4.103 -16.440  1.00 97.05           C  
ATOM   3318  O   LEU C  16       7.017   5.937 -18.603  1.00 97.05           O  
ATOM   3319  CG  LEU C  16       5.322   3.928 -14.921  1.00 97.05           C  
ATOM   3320  CD1 LEU C  16       5.196   2.452 -14.559  1.00 97.05           C  
ATOM   3321  CD2 LEU C  16       6.573   4.533 -14.293  1.00 97.05           C  
ATOM   3322  N   ALA C  17       5.001   5.204 -19.361  1.00 96.98           N  
ATOM   3323  CA  ALA C  17       5.401   5.234 -20.766  1.00 96.98           C  
ATOM   3324  C   ALA C  17       5.811   6.641 -21.190  1.00 96.98           C  
ATOM   3325  CB  ALA C  17       4.269   4.722 -21.653  1.00 96.98           C  
ATOM   3326  O   ALA C  17       6.844   6.825 -21.838  1.00 96.98           O  
ATOM   3327  N   ARG C  18       5.014   7.589 -20.818  1.00 95.29           N  
ATOM   3328  CA  ARG C  18       5.312   8.975 -21.162  1.00 95.29           C  
ATOM   3329  C   ARG C  18       6.601   9.440 -20.494  1.00 95.29           C  
ATOM   3330  CB  ARG C  18       4.153   9.890 -20.758  1.00 95.29           C  
ATOM   3331  O   ARG C  18       7.457  10.049 -21.140  1.00 95.29           O  
ATOM   3332  CG  ARG C  18       2.963   9.829 -21.702  1.00 95.29           C  
ATOM   3333  CD  ARG C  18       1.943  10.916 -21.394  1.00 95.29           C  
ATOM   3334  NE  ARG C  18       1.266  10.676 -20.123  1.00 95.29           N  
ATOM   3335  NH1 ARG C  18       0.905  12.909 -19.655  1.00 95.29           N  
ATOM   3336  NH2 ARG C  18       0.190  11.297 -18.191  1.00 95.29           N  
ATOM   3337  CZ  ARG C  18       0.789  11.628 -19.326  1.00 95.29           C  
ATOM   3338  N   TYR C  19       6.689   9.165 -19.176  1.00 96.13           N  
ATOM   3339  CA  TYR C  19       7.845   9.608 -18.405  1.00 96.13           C  
ATOM   3340  C   TYR C  19       9.130   8.995 -18.947  1.00 96.13           C  
ATOM   3341  CB  TYR C  19       7.677   9.244 -16.926  1.00 96.13           C  
ATOM   3342  O   TYR C  19      10.121   9.698 -19.155  1.00 96.13           O  
ATOM   3343  CG  TYR C  19       8.821   9.701 -16.055  1.00 96.13           C  
ATOM   3344  CD1 TYR C  19       9.748   8.789 -15.553  1.00 96.13           C  
ATOM   3345  CD2 TYR C  19       8.978  11.044 -15.730  1.00 96.13           C  
ATOM   3346  CE1 TYR C  19      10.803   9.205 -14.748  1.00 96.13           C  
ATOM   3347  CE2 TYR C  19      10.029  11.471 -14.926  1.00 96.13           C  
ATOM   3348  OH  TYR C  19      11.978  10.964 -13.644  1.00 96.13           O  
ATOM   3349  CZ  TYR C  19      10.935  10.546 -14.441  1.00 96.13           C  
ATOM   3350  N   LEU C  20       9.150   7.725 -19.198  1.00 97.19           N  
ATOM   3351  CA  LEU C  20      10.335   7.021 -19.676  1.00 97.19           C  
ATOM   3352  C   LEU C  20      10.674   7.434 -21.104  1.00 97.19           C  
ATOM   3353  CB  LEU C  20      10.122   5.507 -19.607  1.00 97.19           C  
ATOM   3354  O   LEU C  20      11.849   7.567 -21.453  1.00 97.19           O  
ATOM   3355  CG  LEU C  20      10.015   4.900 -18.207  1.00 97.19           C  
ATOM   3356  CD1 LEU C  20       9.708   3.409 -18.298  1.00 97.19           C  
ATOM   3357  CD2 LEU C  20      11.299   5.140 -17.420  1.00 97.19           C  
ATOM   3358  N   SER C  21       9.628   7.627 -21.972  1.00 96.51           N  
ATOM   3359  CA  SER C  21       9.841   8.087 -23.340  1.00 96.51           C  
ATOM   3360  C   SER C  21      10.513   9.456 -23.365  1.00 96.51           C  
ATOM   3361  CB  SER C  21       8.515   8.148 -24.099  1.00 96.51           C  
ATOM   3362  O   SER C  21      11.424   9.693 -24.161  1.00 96.51           O  
ATOM   3363  OG  SER C  21       7.964   6.851 -24.252  1.00 96.51           O  
ATOM   3364  N   GLN C  22      10.115  10.337 -22.477  1.00 94.84           N  
ATOM   3365  CA  GLN C  22      10.699  11.670 -22.379  1.00 94.84           C  
ATOM   3366  C   GLN C  22      12.164  11.599 -21.959  1.00 94.84           C  
ATOM   3367  CB  GLN C  22       9.911  12.531 -21.390  1.00 94.84           C  
ATOM   3368  O   GLN C  22      12.936  12.524 -22.221  1.00 94.84           O  
ATOM   3369  CG  GLN C  22       8.590  13.050 -21.943  1.00 94.84           C  
ATOM   3370  CD  GLN C  22       7.782  13.814 -20.912  1.00 94.84           C  
ATOM   3371  NE2 GLN C  22       6.662  14.386 -21.341  1.00 94.84           N  
ATOM   3372  OE1 GLN C  22       8.160  13.890 -19.739  1.00 94.84           O  
ATOM   3373  N   ASN C  23      12.534  10.435 -21.432  1.00 94.66           N  
ATOM   3374  CA  ASN C  23      13.893  10.314 -20.916  1.00 94.66           C  
ATOM   3375  C   ASN C  23      14.739   9.382 -21.778  1.00 94.66           C  
ATOM   3376  CB  ASN C  23      13.875   9.826 -19.466  1.00 94.66           C  
ATOM   3377  O   ASN C  23      15.694   8.773 -21.290  1.00 94.66           O  
ATOM   3378  CG  ASN C  23      13.569  10.936 -18.480  1.00 94.66           C  
ATOM   3379  ND2 ASN C  23      12.309  11.039 -18.075  1.00 94.66           N  
ATOM   3380  OD1 ASN C  23      14.458  11.694 -18.085  1.00 94.66           O  
ATOM   3381  N   GLY C  24      14.268   9.153 -23.044  1.00 94.05           N  
ATOM   3382  CA  GLY C  24      15.135   8.569 -24.055  1.00 94.05           C  
ATOM   3383  C   GLY C  24      14.918   7.079 -24.237  1.00 94.05           C  
ATOM   3384  O   GLY C  24      15.747   6.395 -24.842  1.00 94.05           O  
ATOM   3385  N   PHE C  25      13.842   6.508 -23.691  1.00 95.93           N  
ATOM   3386  CA  PHE C  25      13.564   5.084 -23.839  1.00 95.93           C  
ATOM   3387  C   PHE C  25      12.410   4.856 -24.808  1.00 95.93           C  
ATOM   3388  CB  PHE C  25      13.242   4.454 -22.480  1.00 95.93           C  
ATOM   3389  O   PHE C  25      11.511   5.692 -24.919  1.00 95.93           O  
ATOM   3390  CG  PHE C  25      14.378   4.519 -21.496  1.00 95.93           C  
ATOM   3391  CD1 PHE C  25      15.409   3.588 -21.542  1.00 95.93           C  
ATOM   3392  CD2 PHE C  25      14.416   5.511 -20.525  1.00 95.93           C  
ATOM   3393  CE1 PHE C  25      16.463   3.646 -20.632  1.00 95.93           C  
ATOM   3394  CE2 PHE C  25      15.466   5.575 -19.613  1.00 95.93           C  
ATOM   3395  CZ  PHE C  25      16.487   4.641 -19.667  1.00 95.93           C  
ATOM   3396  N   ARG C  26      12.500   3.767 -25.535  1.00 96.09           N  
ATOM   3397  CA  ARG C  26      11.342   3.230 -26.242  1.00 96.09           C  
ATOM   3398  C   ARG C  26      10.506   2.340 -25.328  1.00 96.09           C  
ATOM   3399  CB  ARG C  26      11.784   2.443 -27.478  1.00 96.09           C  
ATOM   3400  O   ARG C  26      11.021   1.388 -24.739  1.00 96.09           O  
ATOM   3401  CG  ARG C  26      12.532   3.278 -28.505  1.00 96.09           C  
ATOM   3402  CD  ARG C  26      13.037   2.428 -29.663  1.00 96.09           C  
ATOM   3403  NE  ARG C  26      13.810   3.220 -30.615  1.00 96.09           N  
ATOM   3404  NH1 ARG C  26      14.422   1.422 -31.930  1.00 96.09           N  
ATOM   3405  NH2 ARG C  26      15.124   3.535 -32.473  1.00 96.09           N  
ATOM   3406  CZ  ARG C  26      14.450   2.724 -31.671  1.00 96.09           C  
ATOM   3407  N   VAL C  27       9.199   2.670 -25.252  1.00 97.62           N  
ATOM   3408  CA  VAL C  27       8.432   1.993 -24.211  1.00 97.62           C  
ATOM   3409  C   VAL C  27       7.271   1.227 -24.841  1.00 97.62           C  
ATOM   3410  CB  VAL C  27       7.903   2.990 -23.156  1.00 97.62           C  
ATOM   3411  O   VAL C  27       6.554   1.762 -25.690  1.00 97.62           O  
ATOM   3412  CG1 VAL C  27       7.194   2.252 -22.023  1.00 97.62           C  
ATOM   3413  CG2 VAL C  27       9.046   3.844 -22.610  1.00 97.62           C  
ATOM   3414  N   THR C  28       7.133  -0.009 -24.522  1.00 96.90           N  
ATOM   3415  CA  THR C  28       5.969  -0.844 -24.798  1.00 96.90           C  
ATOM   3416  C   THR C  28       5.233  -1.190 -23.507  1.00 96.90           C  
ATOM   3417  CB  THR C  28       6.373  -2.141 -25.525  1.00 96.90           C  
ATOM   3418  O   THR C  28       5.858  -1.387 -22.463  1.00 96.90           O  
ATOM   3419  CG2 THR C  28       5.144  -2.917 -25.988  1.00 96.90           C  
ATOM   3420  OG1 THR C  28       7.175  -1.812 -26.665  1.00 96.90           O  
ATOM   3421  N   THR C  29       3.902  -1.186 -23.579  1.00 97.10           N  
ATOM   3422  CA  THR C  29       3.151  -1.454 -22.358  1.00 97.10           C  
ATOM   3423  C   THR C  29       2.352  -2.748 -22.488  1.00 97.10           C  
ATOM   3424  CB  THR C  29       2.199  -0.292 -22.021  1.00 97.10           C  
ATOM   3425  O   THR C  29       1.998  -3.157 -23.596  1.00 97.10           O  
ATOM   3426  CG2 THR C  29       2.965   1.017 -21.858  1.00 97.10           C  
ATOM   3427  OG1 THR C  29       1.242  -0.144 -23.077  1.00 97.10           O  
ATOM   3428  N   ALA C  30       2.074  -3.367 -21.398  1.00 95.84           N  
ATOM   3429  CA  ALA C  30       1.256  -4.574 -21.306  1.00 95.84           C  
ATOM   3430  C   ALA C  30       0.380  -4.548 -20.057  1.00 95.84           C  
ATOM   3431  CB  ALA C  30       2.142  -5.818 -21.305  1.00 95.84           C  
ATOM   3432  O   ALA C  30       0.853  -4.226 -18.965  1.00 95.84           O  
ATOM   3433  N   ALA C  31      -0.906  -4.967 -20.243  1.00 91.55           N  
ATOM   3434  CA  ALA C  31      -1.863  -4.878 -19.143  1.00 91.55           C  
ATOM   3435  C   ALA C  31      -1.864  -6.158 -18.312  1.00 91.55           C  
ATOM   3436  CB  ALA C  31      -3.264  -4.593 -19.678  1.00 91.55           C  
ATOM   3437  O   ALA C  31      -2.305  -6.158 -17.160  1.00 91.55           O  
ATOM   3438  N   ASP C  32      -1.440  -7.193 -18.924  1.00 88.67           N  
ATOM   3439  CA  ASP C  32      -1.476  -8.491 -18.257  1.00 88.67           C  
ATOM   3440  C   ASP C  32      -0.441  -9.443 -18.853  1.00 88.67           C  
ATOM   3441  CB  ASP C  32      -2.873  -9.106 -18.354  1.00 88.67           C  
ATOM   3442  O   ASP C  32       0.358  -9.046 -19.703  1.00 88.67           O  
ATOM   3443  CG  ASP C  32      -3.379  -9.207 -19.783  1.00 88.67           C  
ATOM   3444  OD1 ASP C  32      -2.571  -9.473 -20.698  1.00 88.67           O  
ATOM   3445  OD2 ASP C  32      -4.596  -9.016 -19.995  1.00 88.67           O  
ATOM   3446  N   ALA C  33      -0.449 -10.656 -18.335  1.00 88.75           N  
ATOM   3447  CA  ALA C  33       0.539 -11.659 -18.724  1.00 88.75           C  
ATOM   3448  C   ALA C  33       0.461 -11.955 -20.219  1.00 88.75           C  
ATOM   3449  CB  ALA C  33       0.339 -12.941 -17.919  1.00 88.75           C  
ATOM   3450  O   ALA C  33       1.490 -12.066 -20.890  1.00 88.75           O  
ATOM   3451  N   ALA C  34      -0.747 -12.107 -20.743  1.00 89.34           N  
ATOM   3452  CA  ALA C  34      -0.959 -12.418 -22.155  1.00 89.34           C  
ATOM   3453  C   ALA C  34      -0.358 -11.339 -23.050  1.00 89.34           C  
ATOM   3454  CB  ALA C  34      -2.449 -12.578 -22.446  1.00 89.34           C  
ATOM   3455  O   ALA C  34       0.359 -11.645 -24.006  1.00 89.34           O  
ATOM   3456  N   GLU C  35      -0.598 -10.077 -22.756  1.00 93.05           N  
ATOM   3457  CA  GLU C  35      -0.062  -8.965 -23.536  1.00 93.05           C  
ATOM   3458  C   GLU C  35       1.455  -8.879 -23.404  1.00 93.05           C  
ATOM   3459  CB  GLU C  35      -0.704  -7.645 -23.101  1.00 93.05           C  
ATOM   3460  O   GLU C  35       2.146  -8.509 -24.356  1.00 93.05           O  
ATOM   3461  CG  GLU C  35      -2.147  -7.483 -23.557  1.00 93.05           C  
ATOM   3462  CD  GLU C  35      -2.723  -6.110 -23.247  1.00 93.05           C  
ATOM   3463  OE1 GLU C  35      -3.946  -5.911 -23.428  1.00 93.05           O  
ATOM   3464  OE2 GLU C  35      -1.945  -5.227 -22.822  1.00 93.05           O  
ATOM   3465  N   MET C  36       1.955  -9.204 -22.223  1.00 93.13           N  
ATOM   3466  CA  MET C  36       3.398  -9.242 -22.009  1.00 93.13           C  
ATOM   3467  C   MET C  36       4.057 -10.269 -22.925  1.00 93.13           C  
ATOM   3468  CB  MET C  36       3.717  -9.564 -20.548  1.00 93.13           C  
ATOM   3469  O   MET C  36       5.053  -9.968 -23.586  1.00 93.13           O  
ATOM   3470  CG  MET C  36       5.206  -9.624 -20.245  1.00 93.13           C  
ATOM   3471  SD  MET C  36       5.554 -10.254 -18.557  1.00 93.13           S  
ATOM   3472  CE  MET C  36       5.217 -12.020 -18.799  1.00 93.13           C  
ATOM   3473  N   ASP C  37       3.453 -11.432 -22.949  1.00 89.69           N  
ATOM   3474  CA  ASP C  37       3.984 -12.506 -23.783  1.00 89.69           C  
ATOM   3475  C   ASP C  37       3.983 -12.108 -25.257  1.00 89.69           C  
ATOM   3476  CB  ASP C  37       3.177 -13.790 -23.584  1.00 89.69           C  
ATOM   3477  O   ASP C  37       4.940 -12.388 -25.982  1.00 89.69           O  
ATOM   3478  CG  ASP C  37       3.394 -14.422 -22.220  1.00 89.69           C  
ATOM   3479  OD1 ASP C  37       4.455 -14.187 -21.601  1.00 89.69           O  
ATOM   3480  OD2 ASP C  37       2.499 -15.164 -21.762  1.00 89.69           O  
ATOM   3481  N   ARG C  38       2.950 -11.508 -25.675  1.00 89.26           N  
ATOM   3482  CA  ARG C  38       2.860 -11.030 -27.051  1.00 89.26           C  
ATOM   3483  C   ARG C  38       3.948 -10.003 -27.347  1.00 89.26           C  
ATOM   3484  CB  ARG C  38       1.480 -10.425 -27.321  1.00 89.26           C  
ATOM   3485  O   ARG C  38       4.590 -10.057 -28.397  1.00 89.26           O  
ATOM   3486  CG  ARG C  38       1.153 -10.271 -28.798  1.00 89.26           C  
ATOM   3487  CD  ARG C  38      -0.225  -9.661 -29.009  1.00 89.26           C  
ATOM   3488  NE  ARG C  38      -1.278 -10.492 -28.432  1.00 89.26           N  
ATOM   3489  NH1 ARG C  38      -2.739  -8.742 -28.055  1.00 89.26           N  
ATOM   3490  NH2 ARG C  38      -3.333 -10.881 -27.485  1.00 89.26           N  
ATOM   3491  CZ  ARG C  38      -2.448 -10.037 -27.992  1.00 89.26           C  
ATOM   3492  N   ALA C  39       4.175  -9.101 -26.380  1.00 89.83           N  
ATOM   3493  CA  ALA C  39       5.177  -8.052 -26.550  1.00 89.83           C  
ATOM   3494  C   ALA C  39       6.584  -8.640 -26.604  1.00 89.83           C  
ATOM   3495  CB  ALA C  39       5.073  -7.030 -25.421  1.00 89.83           C  
ATOM   3496  O   ALA C  39       7.417  -8.202 -27.401  1.00 89.83           O  
ATOM   3497  N   LEU C  40       6.810  -9.614 -25.790  1.00 86.14           N  
ATOM   3498  CA  LEU C  40       8.118 -10.259 -25.739  1.00 86.14           C  
ATOM   3499  C   LEU C  40       8.377 -11.062 -27.010  1.00 86.14           C  
ATOM   3500  CB  LEU C  40       8.219 -11.172 -24.515  1.00 86.14           C  
ATOM   3501  O   LEU C  40       9.529 -11.248 -27.407  1.00 86.14           O  
ATOM   3502  CG  LEU C  40       8.343 -10.476 -23.158  1.00 86.14           C  
ATOM   3503  CD1 LEU C  40       8.238 -11.495 -22.028  1.00 86.14           C  
ATOM   3504  CD2 LEU C  40       9.656  -9.706 -23.071  1.00 86.14           C  
ATOM   3505  N   ALA C  41       7.286 -11.505 -27.672  1.00 85.12           N  
ATOM   3506  CA  ALA C  41       7.399 -12.286 -28.902  1.00 85.12           C  
ATOM   3507  C   ALA C  41       7.634 -11.380 -30.107  1.00 85.12           C  
ATOM   3508  CB  ALA C  41       6.145 -13.132 -29.112  1.00 85.12           C  
ATOM   3509  O   ALA C  41       8.250 -11.794 -31.092  1.00 85.12           O  
ATOM   3510  N   GLU C  42       7.150 -10.144 -30.030  1.00 85.83           N  
ATOM   3511  CA  GLU C  42       7.134  -9.230 -31.168  1.00 85.83           C  
ATOM   3512  C   GLU C  42       8.460  -8.485 -31.296  1.00 85.83           C  
ATOM   3513  CB  GLU C  42       5.980  -8.231 -31.040  1.00 85.83           C  
ATOM   3514  O   GLU C  42       8.896  -8.169 -32.405  1.00 85.83           O  
ATOM   3515  CG  GLU C  42       4.609  -8.841 -31.291  1.00 85.83           C  
ATOM   3516  CD  GLU C  42       3.466  -7.867 -31.053  1.00 85.83           C  
ATOM   3517  OE1 GLU C  42       2.289  -8.259 -31.220  1.00 85.83           O  
ATOM   3518  OE2 GLU C  42       3.751  -6.702 -30.697  1.00 85.83           O  
ATOM   3519  N   ALA C  43       9.053  -8.229 -30.163  1.00 80.96           N  
ATOM   3520  CA  ALA C  43      10.280  -7.439 -30.219  1.00 80.96           C  
ATOM   3521  C   ALA C  43      11.183  -7.743 -29.028  1.00 80.96           C  
ATOM   3522  CB  ALA C  43       9.953  -5.949 -30.269  1.00 80.96           C  
ATOM   3523  O   ALA C  43      10.722  -8.260 -28.007  1.00 80.96           O  
ATOM   3524  N   ARG C  44      12.473  -7.370 -29.241  1.00 81.23           N  
ATOM   3525  CA  ARG C  44      13.422  -7.515 -28.142  1.00 81.23           C  
ATOM   3526  C   ARG C  44      13.208  -6.435 -27.087  1.00 81.23           C  
ATOM   3527  CB  ARG C  44      14.860  -7.462 -28.662  1.00 81.23           C  
ATOM   3528  O   ARG C  44      13.112  -5.250 -27.415  1.00 81.23           O  
ATOM   3529  CG  ARG C  44      15.912  -7.703 -27.591  1.00 81.23           C  
ATOM   3530  CD  ARG C  44      17.322  -7.524 -28.136  1.00 81.23           C  
ATOM   3531  NE  ARG C  44      18.313  -7.487 -27.064  1.00 81.23           N  
ATOM   3532  NH1 ARG C  44      20.114  -7.115 -28.461  1.00 81.23           N  
ATOM   3533  NH2 ARG C  44      20.429  -7.279 -26.196  1.00 81.23           N  
ATOM   3534  CZ  ARG C  44      19.616  -7.294 -27.243  1.00 81.23           C  
ATOM   3535  N   VAL C  45      13.130  -6.922 -25.788  1.00 89.80           N  
ATOM   3536  CA  VAL C  45      12.949  -6.033 -24.645  1.00 89.80           C  
ATOM   3537  C   VAL C  45      14.222  -6.011 -23.801  1.00 89.80           C  
ATOM   3538  CB  VAL C  45      11.743  -6.460 -23.779  1.00 89.80           C  
ATOM   3539  O   VAL C  45      14.781  -7.062 -23.481  1.00 89.80           O  
ATOM   3540  CG1 VAL C  45      11.658  -5.607 -22.514  1.00 89.80           C  
ATOM   3541  CG2 VAL C  45      10.448  -6.361 -24.582  1.00 89.80           C  
ATOM   3542  N   ASP C  46      14.753  -4.788 -23.523  1.00 89.31           N  
ATOM   3543  CA  ASP C  46      16.016  -4.624 -22.811  1.00 89.31           C  
ATOM   3544  C   ASP C  46      15.808  -4.693 -21.300  1.00 89.31           C  
ATOM   3545  CB  ASP C  46      16.678  -3.298 -23.191  1.00 89.31           C  
ATOM   3546  O   ASP C  46      16.737  -5.010 -20.554  1.00 89.31           O  
ATOM   3547  CG  ASP C  46      17.003  -3.200 -24.671  1.00 89.31           C  
ATOM   3548  OD1 ASP C  46      17.827  -3.997 -25.169  1.00 89.31           O  
ATOM   3549  OD2 ASP C  46      16.433  -2.315 -25.345  1.00 89.31           O  
ATOM   3550  N   LEU C  47      14.636  -4.343 -20.834  1.00 93.73           N  
ATOM   3551  CA  LEU C  47      14.281  -4.357 -19.420  1.00 93.73           C  
ATOM   3552  C   LEU C  47      12.767  -4.387 -19.240  1.00 93.73           C  
ATOM   3553  CB  LEU C  47      14.867  -3.136 -18.707  1.00 93.73           C  
ATOM   3554  O   LEU C  47      12.033  -3.768 -20.015  1.00 93.73           O  
ATOM   3555  CG  LEU C  47      14.642  -3.060 -17.196  1.00 93.73           C  
ATOM   3556  CD1 LEU C  47      15.887  -2.518 -16.501  1.00 93.73           C  
ATOM   3557  CD2 LEU C  47      13.427  -2.195 -16.879  1.00 93.73           C  
ATOM   3558  N   VAL C  48      12.356  -5.116 -18.196  1.00 95.37           N  
ATOM   3559  CA  VAL C  48      10.935  -5.196 -17.875  1.00 95.37           C  
ATOM   3560  C   VAL C  48      10.672  -4.538 -16.522  1.00 95.37           C  
ATOM   3561  CB  VAL C  48      10.438  -6.659 -17.861  1.00 95.37           C  
ATOM   3562  O   VAL C  48      11.340  -4.849 -15.533  1.00 95.37           O  
ATOM   3563  CG1 VAL C  48       8.970  -6.727 -17.444  1.00 95.37           C  
ATOM   3564  CG2 VAL C  48      10.636  -7.302 -19.233  1.00 95.37           C  
ATOM   3565  N   VAL C  49       9.801  -3.538 -16.538  1.00 96.58           N  
ATOM   3566  CA  VAL C  49       9.238  -3.021 -15.295  1.00 96.58           C  
ATOM   3567  C   VAL C  49       7.915  -3.723 -14.995  1.00 96.58           C  
ATOM   3568  CB  VAL C  49       9.027  -1.491 -15.360  1.00 96.58           C  
ATOM   3569  O   VAL C  49       6.939  -3.561 -15.731  1.00 96.58           O  
ATOM   3570  CG1 VAL C  49       8.458  -0.968 -14.043  1.00 96.58           C  
ATOM   3571  CG2 VAL C  49      10.339  -0.786 -15.698  1.00 96.58           C  
ATOM   3572  N   LEU C  50       7.928  -4.466 -13.892  1.00 93.89           N  
ATOM   3573  CA  LEU C  50       6.834  -5.405 -13.669  1.00 93.89           C  
ATOM   3574  C   LEU C  50       6.119  -5.104 -12.356  1.00 93.89           C  
ATOM   3575  CB  LEU C  50       7.356  -6.844 -13.661  1.00 93.89           C  
ATOM   3576  O   LEU C  50       6.747  -5.080 -11.294  1.00 93.89           O  
ATOM   3577  CG  LEU C  50       6.317  -7.941 -13.426  1.00 93.89           C  
ATOM   3578  CD1 LEU C  50       5.274  -7.931 -14.539  1.00 93.89           C  
ATOM   3579  CD2 LEU C  50       6.991  -9.306 -13.330  1.00 93.89           C  
ATOM   3580  N   ASP C  51       4.806  -4.876 -12.450  1.00 90.93           N  
ATOM   3581  CA  ASP C  51       3.981  -4.759 -11.252  1.00 90.93           C  
ATOM   3582  C   ASP C  51       3.767  -6.121 -10.597  1.00 90.93           C  
ATOM   3583  CB  ASP C  51       2.632  -4.120 -11.589  1.00 90.93           C  
ATOM   3584  O   ASP C  51       3.499  -7.110 -11.282  1.00 90.93           O  
ATOM   3585  CG  ASP C  51       1.810  -3.785 -10.357  1.00 90.93           C  
ATOM   3586  OD1 ASP C  51       2.387  -3.652  -9.256  1.00 90.93           O  
ATOM   3587  OD2 ASP C  51       0.573  -3.656 -10.488  1.00 90.93           O  
ATOM   3588  N   VAL C  52       3.851  -6.171  -9.236  1.00 82.42           N  
ATOM   3589  CA  VAL C  52       3.736  -7.435  -8.516  1.00 82.42           C  
ATOM   3590  C   VAL C  52       2.268  -7.844  -8.420  1.00 82.42           C  
ATOM   3591  CB  VAL C  52       4.357  -7.342  -7.104  1.00 82.42           C  
ATOM   3592  O   VAL C  52       1.925  -9.006  -8.648  1.00 82.42           O  
ATOM   3593  CG1 VAL C  52       4.067  -8.609  -6.302  1.00 82.42           C  
ATOM   3594  CG2 VAL C  52       5.862  -7.099  -7.199  1.00 82.42           C  
ATOM   3595  N   MET C  53       1.406  -6.879  -8.109  1.00 79.45           N  
ATOM   3596  CA  MET C  53      -0.006  -7.202  -7.923  1.00 79.45           C  
ATOM   3597  C   MET C  53      -0.777  -7.045  -9.230  1.00 79.45           C  
ATOM   3598  CB  MET C  53      -0.624  -6.313  -6.842  1.00 79.45           C  
ATOM   3599  O   MET C  53      -1.025  -5.925  -9.679  1.00 79.45           O  
ATOM   3600  CG  MET C  53       0.033  -6.458  -5.479  1.00 79.45           C  
ATOM   3601  SD  MET C  53      -0.428  -8.024  -4.641  1.00 79.45           S  
ATOM   3602  CE  MET C  53      -2.067  -7.576  -4.004  1.00 79.45           C  
ATOM   3603  N   MET C  54      -1.032  -8.162  -9.861  1.00 79.74           N  
ATOM   3604  CA  MET C  54      -1.847  -8.171 -11.073  1.00 79.74           C  
ATOM   3605  C   MET C  54      -2.927  -9.244 -10.994  1.00 79.74           C  
ATOM   3606  CB  MET C  54      -0.973  -8.398 -12.307  1.00 79.74           C  
ATOM   3607  O   MET C  54      -2.729 -10.286 -10.365  1.00 79.74           O  
ATOM   3608  CG  MET C  54       0.045  -7.296 -12.549  1.00 79.74           C  
ATOM   3609  SD  MET C  54       0.905  -7.474 -14.161  1.00 79.74           S  
ATOM   3610  CE  MET C  54       1.694  -9.091 -13.925  1.00 79.74           C  
ATOM   3611  N   PRO C  55      -4.081  -8.918 -11.465  1.00 68.31           N  
ATOM   3612  CA  PRO C  55      -5.118  -9.952 -11.496  1.00 68.31           C  
ATOM   3613  C   PRO C  55      -4.737 -11.143 -12.374  1.00 68.31           C  
ATOM   3614  CB  PRO C  55      -6.332  -9.217 -12.069  1.00 68.31           C  
ATOM   3615  O   PRO C  55      -4.063 -10.972 -13.393  1.00 68.31           O  
ATOM   3616  CG  PRO C  55      -5.759  -8.047 -12.802  1.00 68.31           C  
ATOM   3617  CD  PRO C  55      -4.417  -7.725 -12.211  1.00 68.31           C  
ATOM   3618  N   GLY C  56      -5.274 -12.356 -11.851  1.00 76.03           N  
ATOM   3619  CA  GLY C  56      -4.953 -13.572 -12.581  1.00 76.03           C  
ATOM   3620  C   GLY C  56      -3.611 -14.164 -12.195  1.00 76.03           C  
ATOM   3621  O   GLY C  56      -3.469 -14.739 -11.114  1.00 76.03           O  
ATOM   3622  N   GLU C  57      -2.618 -13.766 -12.979  1.00 77.93           N  
ATOM   3623  CA  GLU C  57      -1.251 -14.177 -12.672  1.00 77.93           C  
ATOM   3624  C   GLU C  57      -0.465 -13.039 -12.027  1.00 77.93           C  
ATOM   3625  CB  GLU C  57      -0.537 -14.659 -13.937  1.00 77.93           C  
ATOM   3626  O   GLU C  57      -0.324 -11.964 -12.614  1.00 77.93           O  
ATOM   3627  CG  GLU C  57       0.735 -15.448 -13.663  1.00 77.93           C  
ATOM   3628  CD  GLU C  57       1.328 -16.084 -14.911  1.00 77.93           C  
ATOM   3629  OE1 GLU C  57       2.287 -16.879 -14.789  1.00 77.93           O  
ATOM   3630  OE2 GLU C  57       0.830 -15.782 -16.018  1.00 77.93           O  
ATOM   3631  N   ASP C  58       0.089 -13.288 -10.783  1.00 80.46           N  
ATOM   3632  CA  ASP C  58       0.783 -12.210 -10.086  1.00 80.46           C  
ATOM   3633  C   ASP C  58       2.193 -12.017 -10.638  1.00 80.46           C  
ATOM   3634  CB  ASP C  58       0.841 -12.492  -8.583  1.00 80.46           C  
ATOM   3635  O   ASP C  58       2.715 -12.886 -11.340  1.00 80.46           O  
ATOM   3636  CG  ASP C  58       1.651 -13.731  -8.244  1.00 80.46           C  
ATOM   3637  OD1 ASP C  58       2.447 -14.191  -9.091  1.00 80.46           O  
ATOM   3638  OD2 ASP C  58       1.491 -14.254  -7.119  1.00 80.46           O  
ATOM   3639  N   GLY C  59       2.740 -10.806 -10.484  1.00 80.58           N  
ATOM   3640  CA  GLY C  59       4.041 -10.388 -10.982  1.00 80.58           C  
ATOM   3641  C   GLY C  59       5.166 -11.315 -10.563  1.00 80.58           C  
ATOM   3642  O   GLY C  59       6.103 -11.549 -11.330  1.00 80.58           O  
ATOM   3643  N   LEU C  60       5.039 -11.909  -9.366  1.00 81.17           N  
ATOM   3644  CA  LEU C  60       6.060 -12.823  -8.866  1.00 81.17           C  
ATOM   3645  C   LEU C  60       6.095 -14.104  -9.693  1.00 81.17           C  
ATOM   3646  CB  LEU C  60       5.805 -13.159  -7.394  1.00 81.17           C  
ATOM   3647  O   LEU C  60       7.172 -14.613 -10.012  1.00 81.17           O  
ATOM   3648  CG  LEU C  60       6.091 -12.045  -6.386  1.00 81.17           C  
ATOM   3649  CD1 LEU C  60       5.617 -12.455  -4.995  1.00 81.17           C  
ATOM   3650  CD2 LEU C  60       7.578 -11.705  -6.371  1.00 81.17           C  
ATOM   3651  N   SER C  61       4.941 -14.631 -10.032  1.00 83.48           N  
ATOM   3652  CA  SER C  61       4.842 -15.813 -10.882  1.00 83.48           C  
ATOM   3653  C   SER C  61       5.398 -15.540 -12.275  1.00 83.48           C  
ATOM   3654  CB  SER C  61       3.389 -16.279 -10.986  1.00 83.48           C  
ATOM   3655  O   SER C  61       6.103 -16.377 -12.844  1.00 83.48           O  
ATOM   3656  OG  SER C  61       2.896 -16.674  -9.718  1.00 83.48           O  
ATOM   3657  N   LEU C  62       5.149 -14.307 -12.783  1.00 84.62           N  
ATOM   3658  CA  LEU C  62       5.642 -13.906 -14.096  1.00 84.62           C  
ATOM   3659  C   LEU C  62       7.161 -13.774 -14.090  1.00 84.62           C  
ATOM   3660  CB  LEU C  62       5.005 -12.582 -14.526  1.00 84.62           C  
ATOM   3661  O   LEU C  62       7.825 -14.150 -15.059  1.00 84.62           O  
ATOM   3662  CG  LEU C  62       3.531 -12.639 -14.930  1.00 84.62           C  
ATOM   3663  CD1 LEU C  62       3.019 -11.241 -15.263  1.00 84.62           C  
ATOM   3664  CD2 LEU C  62       3.336 -13.581 -16.113  1.00 84.62           C  
ATOM   3665  N   CYS C  63       7.615 -13.229 -13.026  1.00 84.03           N  
ATOM   3666  CA  CYS C  63       9.058 -13.087 -12.865  1.00 84.03           C  
ATOM   3667  C   CYS C  63       9.747 -14.446 -12.901  1.00 84.03           C  
ATOM   3668  CB  CYS C  63       9.384 -12.375 -11.553  1.00 84.03           C  
ATOM   3669  O   CYS C  63      10.778 -14.607 -13.557  1.00 84.03           O  
ATOM   3670  SG  CYS C  63      11.138 -12.002 -11.343  1.00 84.03           S  
ATOM   3671  N   ARG C  64       9.220 -15.406 -12.276  1.00 82.58           N  
ATOM   3672  CA  ARG C  64       9.748 -16.766 -12.259  1.00 82.58           C  
ATOM   3673  C   ARG C  64       9.761 -17.366 -13.661  1.00 82.58           C  
ATOM   3674  CB  ARG C  64       8.927 -17.651 -11.318  1.00 82.58           C  
ATOM   3675  O   ARG C  64      10.735 -18.010 -14.058  1.00 82.58           O  
ATOM   3676  CG  ARG C  64       9.569 -18.997 -11.022  1.00 82.58           C  
ATOM   3677  CD  ARG C  64       8.711 -19.837 -10.086  1.00 82.58           C  
ATOM   3678  NE  ARG C  64       8.806 -19.372  -8.705  1.00 82.58           N  
ATOM   3679  NH1 ARG C  64       6.576 -19.726  -8.215  1.00 82.58           N  
ATOM   3680  NH2 ARG C  64       7.988 -18.889  -6.614  1.00 82.58           N  
ATOM   3681  CZ  ARG C  64       7.790 -19.330  -7.848  1.00 82.58           C  
ATOM   3682  N   ARG C  65       8.713 -17.126 -14.328  1.00 81.94           N  
ATOM   3683  CA  ARG C  65       8.580 -17.647 -15.685  1.00 81.94           C  
ATOM   3684  C   ARG C  65       9.595 -17.000 -16.622  1.00 81.94           C  
ATOM   3685  CB  ARG C  65       7.162 -17.419 -16.212  1.00 81.94           C  
ATOM   3686  O   ARG C  65      10.153 -17.666 -17.496  1.00 81.94           O  
ATOM   3687  CG  ARG C  65       6.891 -18.074 -17.557  1.00 81.94           C  
ATOM   3688  CD  ARG C  65       5.410 -18.049 -17.909  1.00 81.94           C  
ATOM   3689  NE  ARG C  65       4.916 -16.684 -18.065  1.00 81.94           N  
ATOM   3690  NH1 ARG C  65       3.534 -17.169 -19.851  1.00 81.94           N  
ATOM   3691  NH2 ARG C  65       3.655 -15.030 -19.038  1.00 81.94           N  
ATOM   3692  CZ  ARG C  65       4.036 -16.298 -18.984  1.00 81.94           C  
ATOM   3693  N   LEU C  66       9.844 -15.653 -16.448  1.00 79.75           N  
ATOM   3694  CA  LEU C  66      10.706 -14.888 -17.342  1.00 79.75           C  
ATOM   3695  C   LEU C  66      12.177 -15.156 -17.039  1.00 79.75           C  
ATOM   3696  CB  LEU C  66      10.413 -13.390 -17.219  1.00 79.75           C  
ATOM   3697  O   LEU C  66      13.054 -14.778 -17.819  1.00 79.75           O  
ATOM   3698  CG  LEU C  66       9.130 -12.894 -17.887  1.00 79.75           C  
ATOM   3699  CD1 LEU C  66       8.867 -11.439 -17.515  1.00 79.75           C  
ATOM   3700  CD2 LEU C  66       9.218 -13.056 -19.401  1.00 79.75           C  
ATOM   3701  N   ARG C  67      12.320 -15.805 -15.957  1.00 71.31           N  
ATOM   3702  CA  ARG C  67      13.722 -15.979 -15.595  1.00 71.31           C  
ATOM   3703  C   ARG C  67      14.417 -16.948 -16.546  1.00 71.31           C  
ATOM   3704  CB  ARG C  67      13.848 -16.478 -14.154  1.00 71.31           C  
ATOM   3705  O   ARG C  67      15.646 -16.962 -16.637  1.00 71.31           O  
ATOM   3706  CG  ARG C  67      13.670 -15.390 -13.107  1.00 71.31           C  
ATOM   3707  CD  ARG C  67      14.731 -14.306 -13.234  1.00 71.31           C  
ATOM   3708  NE  ARG C  67      14.382 -13.117 -12.462  1.00 71.31           N  
ATOM   3709  NH1 ARG C  67      16.166 -11.854 -13.211  1.00 71.31           N  
ATOM   3710  NH2 ARG C  67      14.665 -10.959 -11.728  1.00 71.31           N  
ATOM   3711  CZ  ARG C  67      15.072 -11.979 -12.469  1.00 71.31           C  
ATOM   3712  N   SER C  68      13.612 -17.710 -17.227  1.00 66.66           N  
ATOM   3713  CA  SER C  68      14.266 -18.503 -18.263  1.00 66.66           C  
ATOM   3714  C   SER C  68      14.945 -17.610 -19.296  1.00 66.66           C  
ATOM   3715  CB  SER C  68      13.256 -19.420 -18.954  1.00 66.66           C  
ATOM   3716  O   SER C  68      15.831 -18.059 -20.026  1.00 66.66           O  
ATOM   3717  OG  SER C  68      12.224 -18.663 -19.563  1.00 66.66           O  
ATOM   3718  N   SER C  69      14.523 -16.296 -19.291  1.00 65.85           N  
ATOM   3719  CA  SER C  69      15.103 -15.299 -20.185  1.00 65.85           C  
ATOM   3720  C   SER C  69      16.063 -14.380 -19.439  1.00 65.85           C  
ATOM   3721  CB  SER C  69      14.002 -14.470 -20.850  1.00 65.85           C  
ATOM   3722  O   SER C  69      16.098 -14.377 -18.207  1.00 65.85           O  
ATOM   3723  OG  SER C  69      13.631 -13.377 -20.028  1.00 65.85           O  
ATOM   3724  N   ASP C  70      17.039 -13.572 -20.221  1.00 68.04           N  
ATOM   3725  CA  ASP C  70      18.047 -12.683 -19.651  1.00 68.04           C  
ATOM   3726  C   ASP C  70      17.499 -11.267 -19.486  1.00 68.04           C  
ATOM   3727  CB  ASP C  70      19.302 -12.662 -20.527  1.00 68.04           C  
ATOM   3728  O   ASP C  70      18.254 -10.332 -19.208  1.00 68.04           O  
ATOM   3729  CG  ASP C  70      20.131 -13.928 -20.403  1.00 68.04           C  
ATOM   3730  OD1 ASP C  70      20.068 -14.598 -19.350  1.00 68.04           O  
ATOM   3731  OD2 ASP C  70      20.857 -14.257 -21.367  1.00 68.04           O  
ATOM   3732  N   VAL C  71      16.260 -11.182 -19.648  1.00 84.30           N  
ATOM   3733  CA  VAL C  71      15.762  -9.811 -19.620  1.00 84.30           C  
ATOM   3734  C   VAL C  71      15.710  -9.309 -18.179  1.00 84.30           C  
ATOM   3735  CB  VAL C  71      14.366  -9.701 -20.273  1.00 84.30           C  
ATOM   3736  O   VAL C  71      15.154  -9.975 -17.302  1.00 84.30           O  
ATOM   3737  CG1 VAL C  71      13.334 -10.500 -19.480  1.00 84.30           C  
ATOM   3738  CG2 VAL C  71      13.943  -8.237 -20.383  1.00 84.30           C  
ATOM   3739  N   PRO C  72      16.506  -8.221 -17.860  1.00 88.11           N  
ATOM   3740  CA  PRO C  72      16.452  -7.641 -16.516  1.00 88.11           C  
ATOM   3741  C   PRO C  72      15.044  -7.202 -16.119  1.00 88.11           C  
ATOM   3742  CB  PRO C  72      17.393  -6.438 -16.612  1.00 88.11           C  
ATOM   3743  O   PRO C  72      14.295  -6.690 -16.954  1.00 88.11           O  
ATOM   3744  CG  PRO C  72      18.231  -6.704 -17.821  1.00 88.11           C  
ATOM   3745  CD  PRO C  72      17.438  -7.551 -18.774  1.00 88.11           C  
ATOM   3746  N   ILE C  73      14.727  -7.475 -14.773  1.00 90.95           N  
ATOM   3747  CA  ILE C  73      13.376  -7.181 -14.306  1.00 90.95           C  
ATOM   3748  C   ILE C  73      13.440  -6.280 -13.075  1.00 90.95           C  
ATOM   3749  CB  ILE C  73      12.596  -8.475 -13.984  1.00 90.95           C  
ATOM   3750  O   ILE C  73      14.185  -6.558 -12.133  1.00 90.95           O  
ATOM   3751  CG1 ILE C  73      12.488  -9.359 -15.232  1.00 90.95           C  
ATOM   3752  CG2 ILE C  73      11.208  -8.145 -13.426  1.00 90.95           C  
ATOM   3753  CD1 ILE C  73      11.960 -10.760 -14.955  1.00 90.95           C  
ATOM   3754  N   ILE C  74      12.799  -5.167 -13.169  1.00 92.72           N  
ATOM   3755  CA  ILE C  74      12.547  -4.361 -11.980  1.00 92.72           C  
ATOM   3756  C   ILE C  74      11.104  -4.557 -11.520  1.00 92.72           C  
ATOM   3757  CB  ILE C  74      12.828  -2.864 -12.241  1.00 92.72           C  
ATOM   3758  O   ILE C  74      10.165  -4.311 -12.281  1.00 92.72           O  
ATOM   3759  CG1 ILE C  74      14.305  -2.651 -12.592  1.00 92.72           C  
ATOM   3760  CG2 ILE C  74      12.426  -2.020 -11.028  1.00 92.72           C  
ATOM   3761  CD1 ILE C  74      14.662  -1.208 -12.918  1.00 92.72           C  
ATOM   3762  N   MET C  75      10.918  -4.921 -10.273  1.00 90.49           N  
ATOM   3763  CA  MET C  75       9.578  -5.152  -9.740  1.00 90.49           C  
ATOM   3764  C   MET C  75       9.057  -3.911  -9.023  1.00 90.49           C  
ATOM   3765  CB  MET C  75       9.577  -6.347  -8.785  1.00 90.49           C  
ATOM   3766  O   MET C  75       9.788  -3.275  -8.262  1.00 90.49           O  
ATOM   3767  CG  MET C  75       9.917  -7.668  -9.456  1.00 90.49           C  
ATOM   3768  SD  MET C  75       8.538  -8.311 -10.481  1.00 90.49           S  
ATOM   3769  CE  MET C  75       7.388  -8.833  -9.179  1.00 90.49           C  
ATOM   3770  N   LEU C  76       7.769  -3.598  -9.377  1.00 89.97           N  
ATOM   3771  CA  LEU C  76       7.062  -2.579  -8.609  1.00 89.97           C  
ATOM   3772  C   LEU C  76       6.131  -3.220  -7.585  1.00 89.97           C  
ATOM   3773  CB  LEU C  76       6.262  -1.664  -9.540  1.00 89.97           C  
ATOM   3774  O   LEU C  76       5.277  -4.034  -7.940  1.00 89.97           O  
ATOM   3775  CG  LEU C  76       7.054  -0.959 -10.642  1.00 89.97           C  
ATOM   3776  CD1 LEU C  76       6.125  -0.106 -11.500  1.00 89.97           C  
ATOM   3777  CD2 LEU C  76       8.167  -0.107 -10.040  1.00 89.97           C  
ATOM   3778  N   THR C  77       6.269  -2.907  -6.342  1.00 82.00           N  
ATOM   3779  CA  THR C  77       5.505  -3.616  -5.322  1.00 82.00           C  
ATOM   3780  C   THR C  77       4.713  -2.636  -4.461  1.00 82.00           C  
ATOM   3781  CB  THR C  77       6.424  -4.466  -4.426  1.00 82.00           C  
ATOM   3782  O   THR C  77       5.027  -1.445  -4.419  1.00 82.00           O  
ATOM   3783  CG2 THR C  77       7.384  -5.306  -5.261  1.00 82.00           C  
ATOM   3784  OG1 THR C  77       7.182  -3.601  -3.572  1.00 82.00           O  
ATOM   3785  N   ALA C  78       3.530  -3.117  -3.905  1.00 70.54           N  
ATOM   3786  CA  ALA C  78       2.713  -2.321  -2.993  1.00 70.54           C  
ATOM   3787  C   ALA C  78       3.345  -2.257  -1.605  1.00 70.54           C  
ATOM   3788  CB  ALA C  78       1.301  -2.895  -2.906  1.00 70.54           C  
ATOM   3789  O   ALA C  78       3.168  -1.275  -0.880  1.00 70.54           O  
ATOM   3790  N   MET C  79       4.277  -3.242  -1.246  1.00 60.49           N  
ATOM   3791  CA  MET C  79       4.621  -3.323   0.170  1.00 60.49           C  
ATOM   3792  C   MET C  79       6.098  -3.011   0.390  1.00 60.49           C  
ATOM   3793  CB  MET C  79       4.291  -4.709   0.726  1.00 60.49           C  
ATOM   3794  O   MET C  79       6.955  -3.487  -0.356  1.00 60.49           O  
ATOM   3795  CG  MET C  79       3.540  -4.676   2.047  1.00 60.49           C  
ATOM   3796  SD  MET C  79       1.853  -5.387   1.914  1.00 60.49           S  
ATOM   3797  CE  MET C  79       2.197  -7.112   2.356  1.00 60.49           C  
ATOM   3798  N   GLY C  80       6.417  -2.106   1.263  1.00 53.24           N  
ATOM   3799  CA  GLY C  80       7.709  -1.660   1.758  1.00 53.24           C  
ATOM   3800  C   GLY C  80       8.289  -2.574   2.821  1.00 53.24           C  
ATOM   3801  O   GLY C  80       9.331  -2.272   3.406  1.00 53.24           O  
ATOM   3802  N   GLU C  81       7.640  -3.723   3.117  1.00 51.79           N  
ATOM   3803  CA  GLU C  81       8.264  -4.542   4.152  1.00 51.79           C  
ATOM   3804  C   GLU C  81       9.377  -5.411   3.572  1.00 51.79           C  
ATOM   3805  CB  GLU C  81       7.219  -5.420   4.846  1.00 51.79           C  
ATOM   3806  O   GLU C  81       9.397  -5.683   2.370  1.00 51.79           O  
ATOM   3807  CG  GLU C  81       6.292  -4.652   5.777  1.00 51.79           C  
ATOM   3808  CD  GLU C  81       5.386  -5.554   6.600  1.00 51.79           C  
ATOM   3809  OE1 GLU C  81       4.642  -5.040   7.466  1.00 51.79           O  
ATOM   3810  OE2 GLU C  81       5.421  -6.785   6.377  1.00 51.79           O  
ATOM   3811  N   ASP C  82      10.475  -5.534   4.312  1.00 50.97           N  
ATOM   3812  CA  ASP C  82      11.659  -6.343   4.036  1.00 50.97           C  
ATOM   3813  C   ASP C  82      11.273  -7.706   3.468  1.00 50.97           C  
ATOM   3814  CB  ASP C  82      12.495  -6.520   5.305  1.00 50.97           C  
ATOM   3815  O   ASP C  82      11.966  -8.243   2.601  1.00 50.97           O  
ATOM   3816  CG  ASP C  82      13.180  -5.239   5.748  1.00 50.97           C  
ATOM   3817  OD1 ASP C  82      13.334  -4.313   4.923  1.00 50.97           O  
ATOM   3818  OD2 ASP C  82      13.571  -5.156   6.932  1.00 50.97           O  
ATOM   3819  N   THR C  83      10.000  -8.193   3.705  1.00 56.52           N  
ATOM   3820  CA  THR C  83       9.648  -9.553   3.314  1.00 56.52           C  
ATOM   3821  C   THR C  83       9.394  -9.635   1.811  1.00 56.52           C  
ATOM   3822  CB  THR C  83       8.404 -10.049   4.075  1.00 56.52           C  
ATOM   3823  O   THR C  83       9.830 -10.582   1.153  1.00 56.52           O  
ATOM   3824  CG2 THR C  83       8.770 -10.517   5.480  1.00 56.52           C  
ATOM   3825  OG1 THR C  83       7.453  -8.982   4.171  1.00 56.52           O  
ATOM   3826  N   ASP C  84       8.709  -8.629   1.282  1.00 56.17           N  
ATOM   3827  CA  ASP C  84       8.382  -8.646  -0.140  1.00 56.17           C  
ATOM   3828  C   ASP C  84       9.634  -8.460  -0.994  1.00 56.17           C  
ATOM   3829  CB  ASP C  84       7.356  -7.559  -0.468  1.00 56.17           C  
ATOM   3830  O   ASP C  84       9.766  -9.077  -2.054  1.00 56.17           O  
ATOM   3831  CG  ASP C  84       5.957  -7.899   0.014  1.00 56.17           C  
ATOM   3832  OD1 ASP C  84       5.662  -9.094   0.236  1.00 56.17           O  
ATOM   3833  OD2 ASP C  84       5.140  -6.965   0.170  1.00 56.17           O  
ATOM   3834  N   ARG C  85      10.498  -7.601  -0.478  1.00 60.34           N  
ATOM   3835  CA  ARG C  85      11.759  -7.362  -1.173  1.00 60.34           C  
ATOM   3836  C   ARG C  85      12.595  -8.635  -1.243  1.00 60.34           C  
ATOM   3837  CB  ARG C  85      12.551  -6.251  -0.481  1.00 60.34           C  
ATOM   3838  O   ARG C  85      13.149  -8.963  -2.294  1.00 60.34           O  
ATOM   3839  CG  ARG C  85      13.740  -5.749  -1.286  1.00 60.34           C  
ATOM   3840  CD  ARG C  85      14.447  -4.595  -0.588  1.00 60.34           C  
ATOM   3841  NE  ARG C  85      15.860  -4.532  -0.950  1.00 60.34           N  
ATOM   3842  NH1 ARG C  85      16.072  -2.266  -0.554  1.00 60.34           N  
ATOM   3843  NH2 ARG C  85      17.876  -3.482  -1.275  1.00 60.34           N  
ATOM   3844  CZ  ARG C  85      16.600  -3.426  -0.926  1.00 60.34           C  
ATOM   3845  N   ILE C  86      12.637  -9.332  -0.161  1.00 62.37           N  
ATOM   3846  CA  ILE C  86      13.411 -10.563  -0.046  1.00 62.37           C  
ATOM   3847  C   ILE C  86      12.845 -11.620  -0.992  1.00 62.37           C  
ATOM   3848  CB  ILE C  86      13.417 -11.092   1.406  1.00 62.37           C  
ATOM   3849  O   ILE C  86      13.595 -12.285  -1.710  1.00 62.37           O  
ATOM   3850  CG1 ILE C  86      14.173 -10.124   2.324  1.00 62.37           C  
ATOM   3851  CG2 ILE C  86      14.029 -12.495   1.467  1.00 62.37           C  
ATOM   3852  CD1 ILE C  86      14.057 -10.457   3.805  1.00 62.37           C  
ATOM   3853  N   VAL C  87      11.534 -11.699  -1.036  1.00 61.88           N  
ATOM   3854  CA  VAL C  87      10.858 -12.696  -1.860  1.00 61.88           C  
ATOM   3855  C   VAL C  87      11.098 -12.394  -3.337  1.00 61.88           C  
ATOM   3856  CB  VAL C  87       9.343 -12.744  -1.564  1.00 61.88           C  
ATOM   3857  O   VAL C  87      11.380 -13.300  -4.125  1.00 61.88           O  
ATOM   3858  CG1 VAL C  87       8.625 -13.643  -2.569  1.00 61.88           C  
ATOM   3859  CG2 VAL C  87       9.093 -13.226  -0.137  1.00 61.88           C  
ATOM   3860  N   GLY C  88      11.011 -11.058  -3.642  1.00 57.71           N  
ATOM   3861  CA  GLY C  88      11.240 -10.648  -5.018  1.00 57.71           C  
ATOM   3862  C   GLY C  88      12.649 -10.939  -5.501  1.00 57.71           C  
ATOM   3863  O   GLY C  88      12.839 -11.458  -6.602  1.00 57.71           O  
ATOM   3864  N   LEU C  89      13.654 -10.654  -4.670  1.00 63.85           N  
ATOM   3865  CA  LEU C  89      15.046 -10.910  -5.026  1.00 63.85           C  
ATOM   3866  C   LEU C  89      15.317 -12.407  -5.118  1.00 63.85           C  
ATOM   3867  CB  LEU C  89      15.987 -10.270  -4.001  1.00 63.85           C  
ATOM   3868  O   LEU C  89      16.026 -12.860  -6.020  1.00 63.85           O  
ATOM   3869  CG  LEU C  89      16.121  -8.748  -4.061  1.00 63.85           C  
ATOM   3870  CD1 LEU C  89      16.850  -8.231  -2.825  1.00 63.85           C  
ATOM   3871  CD2 LEU C  89      16.849  -8.325  -5.333  1.00 63.85           C  
ATOM   3872  N   GLU C  90      14.631 -13.123  -4.263  1.00 68.05           N  
ATOM   3873  CA  GLU C  90      14.797 -14.573  -4.260  1.00 68.05           C  
ATOM   3874  C   GLU C  90      14.183 -15.202  -5.508  1.00 68.05           C  
ATOM   3875  CB  GLU C  90      14.172 -15.183  -3.003  1.00 68.05           C  
ATOM   3876  O   GLU C  90      14.637 -16.252  -5.967  1.00 68.05           O  
ATOM   3877  CG  GLU C  90      14.968 -14.923  -1.732  1.00 68.05           C  
ATOM   3878  CD  GLU C  90      14.374 -15.594  -0.504  1.00 68.05           C  
ATOM   3879  OE1 GLU C  90      15.048 -15.636   0.551  1.00 68.05           O  
ATOM   3880  OE2 GLU C  90      13.226 -16.083  -0.597  1.00 68.05           O  
ATOM   3881  N   MET C  91      13.219 -14.493  -6.092  1.00 68.76           N  
ATOM   3882  CA  MET C  91      12.482 -15.035  -7.229  1.00 68.76           C  
ATOM   3883  C   MET C  91      13.155 -14.656  -8.544  1.00 68.76           C  
ATOM   3884  CB  MET C  91      11.035 -14.538  -7.220  1.00 68.76           C  
ATOM   3885  O   MET C  91      12.675 -15.021  -9.619  1.00 68.76           O  
ATOM   3886  CG  MET C  91      10.197 -15.111  -6.088  1.00 68.76           C  
ATOM   3887  SD  MET C  91       9.925 -16.917  -6.259  1.00 68.76           S  
ATOM   3888  CE  MET C  91       8.643 -16.927  -7.544  1.00 68.76           C  
ATOM   3889  N   GLY C  92      14.210 -13.814  -8.430  1.00 72.46           N  
ATOM   3890  CA  GLY C  92      15.004 -13.576  -9.625  1.00 72.46           C  
ATOM   3891  C   GLY C  92      14.922 -12.145 -10.121  1.00 72.46           C  
ATOM   3892  O   GLY C  92      15.406 -11.832 -11.211  1.00 72.46           O  
ATOM   3893  N   ALA C  93      14.185 -11.244  -9.468  1.00 81.55           N  
ATOM   3894  CA  ALA C  93      14.170  -9.848  -9.897  1.00 81.55           C  
ATOM   3895  C   ALA C  93      15.538  -9.199  -9.703  1.00 81.55           C  
ATOM   3896  CB  ALA C  93      13.102  -9.068  -9.135  1.00 81.55           C  
ATOM   3897  O   ALA C  93      16.257  -9.525  -8.756  1.00 81.55           O  
ATOM   3898  N   ASP C  94      15.972  -8.344 -10.646  1.00 82.93           N  
ATOM   3899  CA  ASP C  94      17.267  -7.674 -10.582  1.00 82.93           C  
ATOM   3900  C   ASP C  94      17.233  -6.505  -9.600  1.00 82.93           C  
ATOM   3901  CB  ASP C  94      17.687  -7.184 -11.969  1.00 82.93           C  
ATOM   3902  O   ASP C  94      18.271  -6.096  -9.077  1.00 82.93           O  
ATOM   3903  CG  ASP C  94      17.847  -8.312 -12.974  1.00 82.93           C  
ATOM   3904  OD1 ASP C  94      18.916  -8.959 -12.999  1.00 82.93           O  
ATOM   3905  OD2 ASP C  94      16.896  -8.553 -13.749  1.00 82.93           O  
ATOM   3906  N   ASP C  95      16.067  -5.975  -9.434  1.00 86.60           N  
ATOM   3907  CA  ASP C  95      15.854  -4.884  -8.488  1.00 86.60           C  
ATOM   3908  C   ASP C  95      14.374  -4.740  -8.140  1.00 86.60           C  
ATOM   3909  CB  ASP C  95      16.390  -3.568  -9.056  1.00 86.60           C  
ATOM   3910  O   ASP C  95      13.519  -5.371  -8.766  1.00 86.60           O  
ATOM   3911  CG  ASP C  95      16.899  -2.622  -7.983  1.00 86.60           C  
ATOM   3912  OD1 ASP C  95      16.512  -2.773  -6.804  1.00 86.60           O  
ATOM   3913  OD2 ASP C  95      17.692  -1.716  -8.319  1.00 86.60           O  
ATOM   3914  N   TYR C  96      14.147  -3.987  -7.096  1.00 87.59           N  
ATOM   3915  CA  TYR C  96      12.768  -3.775  -6.671  1.00 87.59           C  
ATOM   3916  C   TYR C  96      12.538  -2.322  -6.274  1.00 87.59           C  
ATOM   3917  CB  TYR C  96      12.418  -4.698  -5.500  1.00 87.59           C  
ATOM   3918  O   TYR C  96      13.468  -1.633  -5.847  1.00 87.59           O  
ATOM   3919  CG  TYR C  96      13.165  -4.376  -4.229  1.00 87.59           C  
ATOM   3920  CD1 TYR C  96      14.422  -4.922  -3.979  1.00 87.59           C  
ATOM   3921  CD2 TYR C  96      12.616  -3.526  -3.275  1.00 87.59           C  
ATOM   3922  CE1 TYR C  96      15.114  -4.630  -2.808  1.00 87.59           C  
ATOM   3923  CE2 TYR C  96      13.299  -3.226  -2.101  1.00 87.59           C  
ATOM   3924  OH  TYR C  96      15.225  -3.489  -0.715  1.00 87.59           O  
ATOM   3925  CZ  TYR C  96      14.545  -3.782  -1.876  1.00 87.59           C  
ATOM   3926  N   LEU C  97      11.292  -1.856  -6.484  1.00 87.59           N  
ATOM   3927  CA  LEU C  97      10.895  -0.515  -6.069  1.00 87.59           C  
ATOM   3928  C   LEU C  97       9.467  -0.512  -5.533  1.00 87.59           C  
ATOM   3929  CB  LEU C  97      11.014   0.466  -7.239  1.00 87.59           C  
ATOM   3930  O   LEU C  97       8.548  -0.997  -6.198  1.00 87.59           O  
ATOM   3931  CG  LEU C  97      10.862   1.949  -6.899  1.00 87.59           C  
ATOM   3932  CD1 LEU C  97      11.994   2.400  -5.981  1.00 87.59           C  
ATOM   3933  CD2 LEU C  97      10.831   2.789  -8.171  1.00 87.59           C  
ATOM   3934  N   ALA C  98       9.316   0.015  -4.279  1.00 86.43           N  
ATOM   3935  CA  ALA C  98       8.012   0.035  -3.622  1.00 86.43           C  
ATOM   3936  C   ALA C  98       7.169   1.208  -4.114  1.00 86.43           C  
ATOM   3937  CB  ALA C  98       8.181   0.104  -2.106  1.00 86.43           C  
ATOM   3938  O   ALA C  98       7.688   2.305  -4.335  1.00 86.43           O  
ATOM   3939  N   LYS C  99       5.905   0.934  -4.290  1.00 87.46           N  
ATOM   3940  CA  LYS C  99       4.932   2.001  -4.507  1.00 87.46           C  
ATOM   3941  C   LYS C  99       4.453   2.586  -3.182  1.00 87.46           C  
ATOM   3942  CB  LYS C  99       3.740   1.484  -5.313  1.00 87.46           C  
ATOM   3943  O   LYS C  99       4.269   1.856  -2.205  1.00 87.46           O  
ATOM   3944  CG  LYS C  99       4.090   1.056  -6.731  1.00 87.46           C  
ATOM   3945  CD  LYS C  99       2.873   0.512  -7.467  1.00 87.46           C  
ATOM   3946  CE  LYS C  99       3.250  -0.058  -8.828  1.00 87.46           C  
ATOM   3947  NZ  LYS C  99       2.070  -0.650  -9.527  1.00 87.46           N  
ATOM   3948  N   PRO C 100       4.198   3.985  -3.214  1.00 87.36           N  
ATOM   3949  CA  PRO C 100       4.510   4.935  -4.284  1.00 87.36           C  
ATOM   3950  C   PRO C 100       5.998   5.267  -4.363  1.00 87.36           C  
ATOM   3951  CB  PRO C 100       3.693   6.174  -3.906  1.00 87.36           C  
ATOM   3952  O   PRO C 100       6.664   5.384  -3.330  1.00 87.36           O  
ATOM   3953  CG  PRO C 100       3.592   6.124  -2.415  1.00 87.36           C  
ATOM   3954  CD  PRO C 100       3.580   4.685  -1.986  1.00 87.36           C  
ATOM   3955  N   PHE C 101       6.557   5.367  -5.610  1.00 88.97           N  
ATOM   3956  CA  PHE C 101       7.983   5.599  -5.804  1.00 88.97           C  
ATOM   3957  C   PHE C 101       8.227   6.950  -6.466  1.00 88.97           C  
ATOM   3958  CB  PHE C 101       8.600   4.481  -6.651  1.00 88.97           C  
ATOM   3959  O   PHE C 101       7.330   7.506  -7.103  1.00 88.97           O  
ATOM   3960  CG  PHE C 101       7.846   4.194  -7.921  1.00 88.97           C  
ATOM   3961  CD1 PHE C 101       6.909   3.170  -7.974  1.00 88.97           C  
ATOM   3962  CD2 PHE C 101       8.074   4.950  -9.064  1.00 88.97           C  
ATOM   3963  CE1 PHE C 101       6.209   2.903  -9.148  1.00 88.97           C  
ATOM   3964  CE2 PHE C 101       7.379   4.689 -10.241  1.00 88.97           C  
ATOM   3965  CZ  PHE C 101       6.447   3.664 -10.281  1.00 88.97           C  
ATOM   3966  N   ASN C 102       9.424   7.413  -6.201  1.00 87.70           N  
ATOM   3967  CA  ASN C 102       9.918   8.552  -6.968  1.00 87.70           C  
ATOM   3968  C   ASN C 102      10.298   8.149  -8.390  1.00 87.70           C  
ATOM   3969  CB  ASN C 102      11.112   9.197  -6.262  1.00 87.70           C  
ATOM   3970  O   ASN C 102      11.146   7.277  -8.587  1.00 87.70           O  
ATOM   3971  CG  ASN C 102      11.516  10.519  -6.886  1.00 87.70           C  
ATOM   3972  ND2 ASN C 102      11.924  11.468  -6.053  1.00 87.70           N  
ATOM   3973  OD1 ASN C 102      11.460  10.685  -8.107  1.00 87.70           O  
ATOM   3974  N   PRO C 103       9.637   8.822  -9.416  1.00 92.93           N  
ATOM   3975  CA  PRO C 103       9.964   8.470 -10.799  1.00 92.93           C  
ATOM   3976  C   PRO C 103      11.456   8.588 -11.102  1.00 92.93           C  
ATOM   3977  CB  PRO C 103       9.158   9.480 -11.620  1.00 92.93           C  
ATOM   3978  O   PRO C 103      11.995   7.800 -11.882  1.00 92.93           O  
ATOM   3979  CG  PRO C 103       7.973   9.806 -10.769  1.00 92.93           C  
ATOM   3980  CD  PRO C 103       8.412   9.839  -9.333  1.00 92.93           C  
ATOM   3981  N   ARG C 104      12.127   9.492 -10.514  1.00 91.25           N  
ATOM   3982  CA  ARG C 104      13.562   9.671 -10.710  1.00 91.25           C  
ATOM   3983  C   ARG C 104      14.342   8.480 -10.163  1.00 91.25           C  
ATOM   3984  CB  ARG C 104      14.040  10.962 -10.042  1.00 91.25           C  
ATOM   3985  O   ARG C 104      15.362   8.085 -10.733  1.00 91.25           O  
ATOM   3986  CG  ARG C 104      13.555  12.228 -10.731  1.00 91.25           C  
ATOM   3987  CD  ARG C 104      14.128  13.479 -10.080  1.00 91.25           C  
ATOM   3988  NE  ARG C 104      13.750  14.687 -10.808  1.00 91.25           N  
ATOM   3989  NH1 ARG C 104      14.528  16.150  -9.197  1.00 91.25           N  
ATOM   3990  NH2 ARG C 104      13.566  16.955 -11.116  1.00 91.25           N  
ATOM   3991  CZ  ARG C 104      13.949  15.928 -10.372  1.00 91.25           C  
ATOM   3992  N   GLU C 105      13.866   8.028  -9.067  1.00 91.02           N  
ATOM   3993  CA  GLU C 105      14.475   6.824  -8.510  1.00 91.02           C  
ATOM   3994  C   GLU C 105      14.328   5.640  -9.462  1.00 91.02           C  
ATOM   3995  CB  GLU C 105      13.856   6.487  -7.151  1.00 91.02           C  
ATOM   3996  O   GLU C 105      15.277   4.881  -9.667  1.00 91.02           O  
ATOM   3997  CG  GLU C 105      14.489   5.284  -6.469  1.00 91.02           C  
ATOM   3998  CD  GLU C 105      13.916   5.007  -5.088  1.00 91.02           C  
ATOM   3999  OE1 GLU C 105      14.257   3.963  -4.487  1.00 91.02           O  
ATOM   4000  OE2 GLU C 105      13.118   5.840  -4.603  1.00 91.02           O  
ATOM   4001  N   LEU C 106      13.110   5.473  -9.965  1.00 94.83           N  
ATOM   4002  CA  LEU C 106      12.886   4.398 -10.926  1.00 94.83           C  
ATOM   4003  C   LEU C 106      13.821   4.535 -12.123  1.00 94.83           C  
ATOM   4004  CB  LEU C 106      11.430   4.397 -11.398  1.00 94.83           C  
ATOM   4005  O   LEU C 106      14.434   3.555 -12.553  1.00 94.83           O  
ATOM   4006  CG  LEU C 106      11.068   3.376 -12.478  1.00 94.83           C  
ATOM   4007  CD1 LEU C 106      11.352   1.961 -11.985  1.00 94.83           C  
ATOM   4008  CD2 LEU C 106       9.606   3.523 -12.885  1.00 94.83           C  
ATOM   4009  N   LEU C 107      13.942   5.742 -12.611  1.00 95.02           N  
ATOM   4010  CA  LEU C 107      14.826   6.006 -13.741  1.00 95.02           C  
ATOM   4011  C   LEU C 107      16.265   5.630 -13.404  1.00 95.02           C  
ATOM   4012  CB  LEU C 107      14.753   7.480 -14.147  1.00 95.02           C  
ATOM   4013  O   LEU C 107      16.953   5.001 -14.212  1.00 95.02           O  
ATOM   4014  CG  LEU C 107      15.549   7.882 -15.389  1.00 95.02           C  
ATOM   4015  CD1 LEU C 107      15.066   7.097 -16.605  1.00 95.02           C  
ATOM   4016  CD2 LEU C 107      15.435   9.383 -15.636  1.00 95.02           C  
ATOM   4017  N   ALA C 108      16.765   6.031 -12.282  1.00 91.46           N  
ATOM   4018  CA  ALA C 108      18.125   5.723 -11.846  1.00 91.46           C  
ATOM   4019  C   ALA C 108      18.342   4.216 -11.752  1.00 91.46           C  
ATOM   4020  CB  ALA C 108      18.416   6.385 -10.502  1.00 91.46           C  
ATOM   4021  O   ALA C 108      19.385   3.705 -12.167  1.00 91.46           O  
ATOM   4022  N   ARG C 109      17.359   3.555 -11.259  1.00 90.17           N  
ATOM   4023  CA  ARG C 109      17.455   2.106 -11.111  1.00 90.17           C  
ATOM   4024  C   ARG C 109      17.450   1.415 -12.470  1.00 90.17           C  
ATOM   4025  CB  ARG C 109      16.306   1.576 -10.249  1.00 90.17           C  
ATOM   4026  O   ARG C 109      18.151   0.421 -12.669  1.00 90.17           O  
ATOM   4027  CG  ARG C 109      16.406   1.965  -8.783  1.00 90.17           C  
ATOM   4028  CD  ARG C 109      15.226   1.438  -7.978  1.00 90.17           C  
ATOM   4029  NE  ARG C 109      15.275   1.890  -6.591  1.00 90.17           N  
ATOM   4030  NH1 ARG C 109      16.760   0.263  -5.896  1.00 90.17           N  
ATOM   4031  NH2 ARG C 109      15.973   1.815  -4.404  1.00 90.17           N  
ATOM   4032  CZ  ARG C 109      16.003   1.322  -5.633  1.00 90.17           C  
ATOM   4033  N   ILE C 110      16.623   1.933 -13.329  1.00 94.23           N  
ATOM   4034  CA  ILE C 110      16.600   1.412 -14.691  1.00 94.23           C  
ATOM   4035  C   ILE C 110      17.976   1.578 -15.331  1.00 94.23           C  
ATOM   4036  CB  ILE C 110      15.522   2.114 -15.547  1.00 94.23           C  
ATOM   4037  O   ILE C 110      18.529   0.626 -15.885  1.00 94.23           O  
ATOM   4038  CG1 ILE C 110      14.121   1.665 -15.115  1.00 94.23           C  
ATOM   4039  CG2 ILE C 110      15.751   1.839 -17.036  1.00 94.23           C  
ATOM   4040  CD1 ILE C 110      12.991   2.448 -15.771  1.00 94.23           C  
ATOM   4041  N   ARG C 111      18.575   2.693 -15.235  1.00 90.17           N  
ATOM   4042  CA  ARG C 111      19.888   2.959 -15.812  1.00 90.17           C  
ATOM   4043  C   ARG C 111      20.957   2.081 -15.170  1.00 90.17           C  
ATOM   4044  CB  ARG C 111      20.257   4.436 -15.652  1.00 90.17           C  
ATOM   4045  O   ARG C 111      21.830   1.552 -15.861  1.00 90.17           O  
ATOM   4046  CG  ARG C 111      19.509   5.363 -16.597  1.00 90.17           C  
ATOM   4047  CD  ARG C 111      19.903   6.819 -16.387  1.00 90.17           C  
ATOM   4048  NE  ARG C 111      19.235   7.701 -17.339  1.00 90.17           N  
ATOM   4049  NH1 ARG C 111      19.447   9.602 -16.044  1.00 90.17           N  
ATOM   4050  NH2 ARG C 111      18.415   9.711 -18.087  1.00 90.17           N  
ATOM   4051  CZ  ARG C 111      19.034   9.003 -17.155  1.00 90.17           C  
ATOM   4052  N   ALA C 112      20.875   2.000 -13.861  1.00 83.15           N  
ATOM   4053  CA  ALA C 112      21.823   1.171 -13.121  1.00 83.15           C  
ATOM   4054  C   ALA C 112      21.740  -0.287 -13.565  1.00 83.15           C  
ATOM   4055  CB  ALA C 112      21.568   1.281 -11.620  1.00 83.15           C  
ATOM   4056  O   ALA C 112      22.766  -0.930 -13.800  1.00 83.15           O  
ATOM   4057  N   VAL C 113      20.536  -0.814 -13.704  1.00 84.57           N  
ATOM   4058  CA  VAL C 113      20.329  -2.207 -14.088  1.00 84.57           C  
ATOM   4059  C   VAL C 113      20.779  -2.417 -15.532  1.00 84.57           C  
ATOM   4060  CB  VAL C 113      18.852  -2.628 -13.923  1.00 84.57           C  
ATOM   4061  O   VAL C 113      21.405  -3.429 -15.853  1.00 84.57           O  
ATOM   4062  CG1 VAL C 113      18.595  -3.974 -14.598  1.00 84.57           C  
ATOM   4063  CG2 VAL C 113      18.477  -2.689 -12.443  1.00 84.57           C  
ATOM   4064  N   LEU C 114      20.500  -1.468 -16.402  1.00 84.92           N  
ATOM   4065  CA  LEU C 114      20.900  -1.566 -17.802  1.00 84.92           C  
ATOM   4066  C   LEU C 114      22.415  -1.476 -17.943  1.00 84.92           C  
ATOM   4067  CB  LEU C 114      20.233  -0.462 -18.628  1.00 84.92           C  
ATOM   4068  O   LEU C 114      22.996  -2.081 -18.847  1.00 84.92           O  
ATOM   4069  CG  LEU C 114      18.750  -0.657 -18.948  1.00 84.92           C  
ATOM   4070  CD1 LEU C 114      18.184   0.590 -19.619  1.00 84.92           C  
ATOM   4071  CD2 LEU C 114      18.550  -1.884 -19.831  1.00 84.92           C  
ATOM   4072  N   ARG C 115      23.016  -0.617 -17.116  1.00 79.16           N  
ATOM   4073  CA  ARG C 115      24.470  -0.492 -17.142  1.00 79.16           C  
ATOM   4074  C   ARG C 115      25.140  -1.820 -16.807  1.00 79.16           C  
ATOM   4075  CB  ARG C 115      24.935   0.591 -16.166  1.00 79.16           C  
ATOM   4076  O   ARG C 115      26.173  -2.163 -17.385  1.00 79.16           O  
ATOM   4077  CG  ARG C 115      26.418   0.910 -16.261  1.00 79.16           C  
ATOM   4078  CD  ARG C 115      26.779   2.157 -15.466  1.00 79.16           C  
ATOM   4079  NE  ARG C 115      26.467   2.001 -14.048  1.00 79.16           N  
ATOM   4080  NH1 ARG C 115      25.658   4.148 -13.779  1.00 79.16           N  
ATOM   4081  NH2 ARG C 115      25.697   2.702 -12.001  1.00 79.16           N  
ATOM   4082  CZ  ARG C 115      25.941   2.951 -13.279  1.00 79.16           C  
ATOM   4083  N   ARG C 116      24.602  -2.581 -15.853  1.00 69.56           N  
ATOM   4084  CA  ARG C 116      25.145  -3.847 -15.371  1.00 69.56           C  
ATOM   4085  C   ARG C 116      24.897  -4.967 -16.376  1.00 69.56           C  
ATOM   4086  CB  ARG C 116      24.535  -4.214 -14.016  1.00 69.56           C  
ATOM   4087  O   ARG C 116      25.612  -5.972 -16.383  1.00 69.56           O  
ATOM   4088  CG  ARG C 116      24.976  -3.309 -12.877  1.00 69.56           C  
ATOM   4089  CD  ARG C 116      24.287  -3.673 -11.569  1.00 69.56           C  
ATOM   4090  NE  ARG C 116      24.579  -2.703 -10.518  1.00 69.56           N  
ATOM   4091  NH1 ARG C 116      23.117  -3.617  -8.981  1.00 69.56           N  
ATOM   4092  NH2 ARG C 116      24.356  -1.769  -8.431  1.00 69.56           N  
ATOM   4093  CZ  ARG C 116      24.017  -2.699  -9.312  1.00 69.56           C  
ATOM   4094  N   ALA C 117      23.879  -4.729 -17.207  1.00 62.16           N  
ATOM   4095  CA  ALA C 117      23.563  -5.756 -18.197  1.00 62.16           C  
ATOM   4096  C   ALA C 117      24.608  -5.785 -19.309  1.00 62.16           C  
ATOM   4097  CB  ALA C 117      22.174  -5.520 -18.784  1.00 62.16           C  
ATOM   4098  O   ALA C 117      25.126  -4.740 -19.710  1.00 62.16           O  
ATOM   4099  N   PRO C 118      25.414  -6.946 -19.537  1.00 50.18           N  
ATOM   4100  CA  PRO C 118      26.478  -6.840 -20.538  1.00 50.18           C  
ATOM   4101  C   PRO C 118      26.035  -6.091 -21.793  1.00 50.18           C  
ATOM   4102  CB  PRO C 118      26.807  -8.299 -20.860  1.00 50.18           C  
ATOM   4103  O   PRO C 118      24.885  -6.220 -22.220  1.00 50.18           O  
ATOM   4104  CG  PRO C 118      25.751  -9.092 -20.159  1.00 50.18           C  
ATOM   4105  CD  PRO C 118      24.927  -8.156 -19.324  1.00 50.18           C  
ATOM   4106  N   PRO C 119      26.776  -5.008 -22.222  1.00 45.33           N  
ATOM   4107  CA  PRO C 119      26.518  -4.493 -23.569  1.00 45.33           C  
ATOM   4108  C   PRO C 119      26.510  -5.591 -24.629  1.00 45.33           C  
ATOM   4109  CB  PRO C 119      27.675  -3.518 -23.801  1.00 45.33           C  
ATOM   4110  O   PRO C 119      27.231  -6.584 -24.500  1.00 45.33           O  
ATOM   4111  CG  PRO C 119      28.620  -3.770 -22.671  1.00 45.33           C  
ATOM   4112  CD  PRO C 119      27.953  -4.689 -21.688  1.00 45.33           C  
ATOM   4113  N   SER C 120      25.328  -5.927 -25.176  1.00 43.75           N  
ATOM   4114  CA  SER C 120      25.402  -6.772 -26.363  1.00 43.75           C  
ATOM   4115  C   SER C 120      26.306  -6.156 -27.425  1.00 43.75           C  
ATOM   4116  CB  SER C 120      24.006  -7.005 -26.943  1.00 43.75           C  
ATOM   4117  O   SER C 120      26.073  -5.030 -27.869  1.00 43.75           O  
ATOM   4118  OG  SER C 120      23.392  -8.131 -26.339  1.00 43.75           O  
ATOM   4119  N   PRO C 121      27.610  -6.389 -27.320  1.00 39.19           N  
ATOM   4120  CA  PRO C 121      28.237  -5.816 -28.513  1.00 39.19           C  
ATOM   4121  C   PRO C 121      27.699  -6.419 -29.809  1.00 39.19           C  
ATOM   4122  CB  PRO C 121      29.719  -6.152 -28.329  1.00 39.19           C  
ATOM   4123  O   PRO C 121      27.200  -7.548 -29.809  1.00 39.19           O  
ATOM   4124  CG  PRO C 121      29.752  -7.123 -27.193  1.00 39.19           C  
ATOM   4125  CD  PRO C 121      28.358  -7.276 -26.655  1.00 39.19           C  
ATOM   4126  N   PRO C 122      27.330  -5.560 -30.751  1.00 40.22           N  
ATOM   4127  CA  PRO C 122      27.089  -6.000 -32.128  1.00 40.22           C  
ATOM   4128  C   PRO C 122      28.167  -6.952 -32.640  1.00 40.22           C  
ATOM   4129  CB  PRO C 122      27.093  -4.692 -32.922  1.00 40.22           C  
ATOM   4130  O   PRO C 122      29.357  -6.723 -32.412  1.00 40.22           O  
ATOM   4131  CG  PRO C 122      27.648  -3.674 -31.979  1.00 40.22           C  
ATOM   4132  CD  PRO C 122      27.990  -4.358 -30.686  1.00 40.22           C  
ATOM   4133  N   GLY C 123      27.918  -8.270 -32.538  1.00 47.24           N  
ATOM   4134  CA  GLY C 123      28.688  -9.304 -33.211  1.00 47.24           C  
ATOM   4135  C   GLY C 123      29.100 -10.436 -32.288  1.00 47.24           C  
ATOM   4136  O   GLY C 123      30.140 -11.064 -32.495  1.00 47.24           O  
ATOM   4137  N   SER C 124      28.356 -10.758 -31.275  1.00 52.94           N  
ATOM   4138  CA  SER C 124      28.619 -11.842 -30.334  1.00 52.94           C  
ATOM   4139  C   SER C 124      28.913 -13.148 -31.064  1.00 52.94           C  
ATOM   4140  CB  SER C 124      27.431 -12.032 -29.390  1.00 52.94           C  
ATOM   4141  O   SER C 124      28.206 -13.511 -32.007  1.00 52.94           O  
ATOM   4142  OG  SER C 124      27.470 -11.086 -28.336  1.00 52.94           O  
ATOM   4143  N   PRO C 125      30.119 -13.814 -30.721  1.00 67.68           N  
ATOM   4144  CA  PRO C 125      30.553 -15.007 -31.452  1.00 67.68           C  
ATOM   4145  C   PRO C 125      29.559 -16.161 -31.341  1.00 67.68           C  
ATOM   4146  CB  PRO C 125      31.882 -15.366 -30.783  1.00 67.68           C  
ATOM   4147  O   PRO C 125      28.962 -16.367 -30.282  1.00 67.68           O  
ATOM   4148  CG  PRO C 125      31.959 -14.478 -29.583  1.00 67.68           C  
ATOM   4149  CD  PRO C 125      30.824 -13.495 -29.645  1.00 67.68           C  
ATOM   4150  N   ARG C 126      28.806 -16.443 -32.283  1.00 83.87           N  
ATOM   4151  CA  ARG C 126      28.234 -17.774 -32.458  1.00 83.87           C  
ATOM   4152  C   ARG C 126      29.324 -18.840 -32.484  1.00 83.87           C  
ATOM   4153  CB  ARG C 126      27.407 -17.839 -33.744  1.00 83.87           C  
ATOM   4154  O   ARG C 126      30.303 -18.716 -33.224  1.00 83.87           O  
ATOM   4155  CG  ARG C 126      26.147 -16.989 -33.710  1.00 83.87           C  
ATOM   4156  CD  ARG C 126      25.306 -17.176 -34.965  1.00 83.87           C  
ATOM   4157  NE  ARG C 126      24.129 -16.312 -34.959  1.00 83.87           N  
ATOM   4158  NH1 ARG C 126      23.426 -16.907 -37.078  1.00 83.87           N  
ATOM   4159  NH2 ARG C 126      22.226 -15.387 -35.852  1.00 83.87           N  
ATOM   4160  CZ  ARG C 126      23.263 -16.204 -35.963  1.00 83.87           C  
ATOM   4161  N   LEU C 127      29.303 -19.627 -31.473  1.00 88.53           N  
ATOM   4162  CA  LEU C 127      30.221 -20.759 -31.408  1.00 88.53           C  
ATOM   4163  C   LEU C 127      29.566 -22.022 -31.955  1.00 88.53           C  
ATOM   4164  CB  LEU C 127      30.683 -20.993 -29.967  1.00 88.53           C  
ATOM   4165  O   LEU C 127      28.427 -22.338 -31.603  1.00 88.53           O  
ATOM   4166  CG  LEU C 127      31.401 -19.826 -29.287  1.00 88.53           C  
ATOM   4167  CD1 LEU C 127      31.537 -20.087 -27.791  1.00 88.53           C  
ATOM   4168  CD2 LEU C 127      32.769 -19.597 -29.922  1.00 88.53           C  
ATOM   4169  N   ARG C 128      30.264 -22.581 -32.986  1.00 91.03           N  
ATOM   4170  CA  ARG C 128      29.759 -23.799 -33.613  1.00 91.03           C  
ATOM   4171  C   ARG C 128      30.581 -25.012 -33.193  1.00 91.03           C  
ATOM   4172  CB  ARG C 128      29.767 -23.662 -35.137  1.00 91.03           C  
ATOM   4173  O   ARG C 128      31.810 -24.943 -33.125  1.00 91.03           O  
ATOM   4174  CG  ARG C 128      28.827 -22.590 -35.665  1.00 91.03           C  
ATOM   4175  CD  ARG C 128      28.822 -22.544 -37.186  1.00 91.03           C  
ATOM   4176  NE  ARG C 128      27.819 -21.612 -37.694  1.00 91.03           N  
ATOM   4177  NH1 ARG C 128      28.427 -21.842 -39.911  1.00 91.03           N  
ATOM   4178  NH2 ARG C 128      26.710 -20.440 -39.328  1.00 91.03           N  
ATOM   4179  CZ  ARG C 128      27.654 -21.300 -38.976  1.00 91.03           C  
ATOM   4180  N   PHE C 129      29.881 -26.121 -32.857  1.00 92.11           N  
ATOM   4181  CA  PHE C 129      30.507 -27.391 -32.509  1.00 92.11           C  
ATOM   4182  C   PHE C 129      29.588 -28.559 -32.846  1.00 92.11           C  
ATOM   4183  CB  PHE C 129      30.871 -27.422 -31.021  1.00 92.11           C  
ATOM   4184  O   PHE C 129      28.370 -28.463 -32.684  1.00 92.11           O  
ATOM   4185  CG  PHE C 129      29.688 -27.271 -30.103  1.00 92.11           C  
ATOM   4186  CD1 PHE C 129      29.253 -26.012 -29.709  1.00 92.11           C  
ATOM   4187  CD2 PHE C 129      29.011 -28.389 -29.634  1.00 92.11           C  
ATOM   4188  CE1 PHE C 129      28.158 -25.869 -28.860  1.00 92.11           C  
ATOM   4189  CE2 PHE C 129      27.917 -28.254 -28.785  1.00 92.11           C  
ATOM   4190  CZ  PHE C 129      27.492 -26.994 -28.399  1.00 92.11           C  
ATOM   4191  N   ALA C 130      30.174 -29.586 -33.481  1.00 89.83           N  
ATOM   4192  CA  ALA C 130      29.515 -30.854 -33.785  1.00 89.83           C  
ATOM   4193  C   ALA C 130      28.125 -30.623 -34.372  1.00 89.83           C  
ATOM   4194  CB  ALA C 130      29.422 -31.720 -32.531  1.00 89.83           C  
ATOM   4195  O   ALA C 130      27.174 -31.329 -34.029  1.00 89.83           O  
ATOM   4196  N   GLY C 131      27.961 -29.546 -35.203  1.00 88.98           N  
ATOM   4197  CA  GLY C 131      26.701 -29.233 -35.860  1.00 88.98           C  
ATOM   4198  C   GLY C 131      25.805 -28.331 -35.033  1.00 88.98           C  
ATOM   4199  O   GLY C 131      24.709 -27.969 -35.467  1.00 88.98           O  
ATOM   4200  N   TRP C 132      26.212 -27.988 -33.765  1.00 93.70           N  
ATOM   4201  CA  TRP C 132      25.453 -27.098 -32.893  1.00 93.70           C  
ATOM   4202  C   TRP C 132      25.931 -25.657 -33.036  1.00 93.70           C  
ATOM   4203  CB  TRP C 132      25.570 -27.546 -31.433  1.00 93.70           C  
ATOM   4204  O   TRP C 132      27.104 -25.412 -33.329  1.00 93.70           O  
ATOM   4205  CG  TRP C 132      25.011 -28.912 -31.168  1.00 93.70           C  
ATOM   4206  CD1 TRP C 132      25.663 -30.107 -31.288  1.00 93.70           C  
ATOM   4207  CD2 TRP C 132      23.680 -29.221 -30.742  1.00 93.70           C  
ATOM   4208  CE2 TRP C 132      23.596 -30.626 -30.623  1.00 93.70           C  
ATOM   4209  CE3 TRP C 132      22.550 -28.447 -30.448  1.00 93.70           C  
ATOM   4210  NE1 TRP C 132      24.818 -31.142 -30.962  1.00 93.70           N  
ATOM   4211  CH2 TRP C 132      21.334 -30.492 -29.941  1.00 93.70           C  
ATOM   4212  CZ2 TRP C 132      22.425 -31.273 -30.222  1.00 93.70           C  
ATOM   4213  CZ3 TRP C 132      21.385 -29.092 -30.050  1.00 93.70           C  
ATOM   4214  N   THR C 133      25.015 -24.792 -32.886  1.00 91.72           N  
ATOM   4215  CA  THR C 133      25.355 -23.375 -32.816  1.00 91.72           C  
ATOM   4216  C   THR C 133      24.910 -22.777 -31.485  1.00 91.72           C  
ATOM   4217  CB  THR C 133      24.715 -22.589 -33.975  1.00 91.72           C  
ATOM   4218  O   THR C 133      23.735 -22.865 -31.121  1.00 91.72           O  
ATOM   4219  CG2 THR C 133      25.125 -21.120 -33.936  1.00 91.72           C  
ATOM   4220  OG1 THR C 133      25.136 -23.158 -35.221  1.00 91.72           O  
ATOM   4221  N   LEU C 134      25.895 -22.264 -30.762  1.00 91.82           N  
ATOM   4222  CA  LEU C 134      25.604 -21.557 -29.519  1.00 91.82           C  
ATOM   4223  C   LEU C 134      25.737 -20.050 -29.707  1.00 91.82           C  
ATOM   4224  CB  LEU C 134      26.539 -22.029 -28.403  1.00 91.82           C  
ATOM   4225  O   LEU C 134      26.834 -19.547 -29.964  1.00 91.82           O  
ATOM   4226  CG  LEU C 134      26.302 -21.423 -27.019  1.00 91.82           C  
ATOM   4227  CD1 LEU C 134      24.938 -21.846 -26.481  1.00 91.82           C  
ATOM   4228  CD2 LEU C 134      27.412 -21.834 -26.057  1.00 91.82           C  
ATOM   4229  N   ASP C 135      24.564 -19.430 -29.583  1.00 85.60           N  
ATOM   4230  CA  ASP C 135      24.539 -17.971 -29.610  1.00 85.60           C  
ATOM   4231  C   ASP C 135      24.715 -17.393 -28.208  1.00 85.60           C  
ATOM   4232  CB  ASP C 135      23.233 -17.468 -30.227  1.00 85.60           C  
ATOM   4233  O   ASP C 135      23.791 -17.436 -27.392  1.00 85.60           O  
ATOM   4234  CG  ASP C 135      23.240 -15.973 -30.494  1.00 85.60           C  
ATOM   4235  OD1 ASP C 135      23.821 -15.212 -29.690  1.00 85.60           O  
ATOM   4236  OD2 ASP C 135      22.658 -15.552 -31.517  1.00 85.60           O  
ATOM   4237  N   LEU C 136      25.886 -16.824 -27.944  1.00 80.97           N  
ATOM   4238  CA  LEU C 136      26.211 -16.386 -26.590  1.00 80.97           C  
ATOM   4239  C   LEU C 136      25.363 -15.184 -26.189  1.00 80.97           C  
ATOM   4240  CB  LEU C 136      27.698 -16.036 -26.483  1.00 80.97           C  
ATOM   4241  O   LEU C 136      25.012 -15.030 -25.017  1.00 80.97           O  
ATOM   4242  CG  LEU C 136      28.681 -17.194 -26.661  1.00 80.97           C  
ATOM   4243  CD1 LEU C 136      30.116 -16.678 -26.635  1.00 80.97           C  
ATOM   4244  CD2 LEU C 136      28.467 -18.249 -25.581  1.00 80.97           C  
ATOM   4245  N   ALA C 137      24.896 -14.479 -27.210  1.00 71.07           N  
ATOM   4246  CA  ALA C 137      24.110 -13.280 -26.931  1.00 71.07           C  
ATOM   4247  C   ALA C 137      22.651 -13.633 -26.657  1.00 71.07           C  
ATOM   4248  CB  ALA C 137      24.207 -12.297 -28.095  1.00 71.07           C  
ATOM   4249  O   ALA C 137      22.055 -13.134 -25.700  1.00 71.07           O  
ATOM   4250  N   ARG C 138      22.118 -14.527 -27.569  1.00 72.39           N  
ATOM   4251  CA  ARG C 138      20.720 -14.928 -27.451  1.00 72.39           C  
ATOM   4252  C   ARG C 138      20.558 -16.062 -26.444  1.00 72.39           C  
ATOM   4253  CB  ARG C 138      20.165 -15.353 -28.812  1.00 72.39           C  
ATOM   4254  O   ARG C 138      19.436 -16.420 -26.079  1.00 72.39           O  
ATOM   4255  CG  ARG C 138      20.065 -14.217 -29.818  1.00 72.39           C  
ATOM   4256  CD  ARG C 138      19.453 -14.681 -31.133  1.00 72.39           C  
ATOM   4257  NE  ARG C 138      19.249 -13.567 -32.055  1.00 72.39           N  
ATOM   4258  NH1 ARG C 138      18.754 -14.897 -33.878  1.00 72.39           N  
ATOM   4259  NH2 ARG C 138      18.761 -12.615 -34.087  1.00 72.39           N  
ATOM   4260  CZ  ARG C 138      18.922 -13.696 -33.338  1.00 72.39           C  
ATOM   4261  N   ARG C 139      21.704 -16.615 -25.927  1.00 74.71           N  
ATOM   4262  CA  ARG C 139      21.700 -17.803 -25.080  1.00 74.71           C  
ATOM   4263  C   ARG C 139      20.815 -18.895 -25.674  1.00 74.71           C  
ATOM   4264  CB  ARG C 139      21.226 -17.456 -23.668  1.00 74.71           C  
ATOM   4265  O   ARG C 139      20.031 -19.523 -24.959  1.00 74.71           O  
ATOM   4266  CG  ARG C 139      22.158 -16.515 -22.920  1.00 74.71           C  
ATOM   4267  CD  ARG C 139      21.625 -16.178 -21.534  1.00 74.71           C  
ATOM   4268  NE  ARG C 139      21.711 -17.322 -20.631  1.00 74.71           N  
ATOM   4269  NH1 ARG C 139      23.599 -16.575 -19.530  1.00 74.71           N  
ATOM   4270  NH2 ARG C 139      22.630 -18.564 -18.931  1.00 74.71           N  
ATOM   4271  CZ  ARG C 139      22.646 -17.484 -19.699  1.00 74.71           C  
ATOM   4272  N   GLU C 140      20.944 -19.051 -26.923  1.00 83.94           N  
ATOM   4273  CA  GLU C 140      20.178 -20.044 -27.670  1.00 83.94           C  
ATOM   4274  C   GLU C 140      21.091 -21.111 -28.266  1.00 83.94           C  
ATOM   4275  CB  GLU C 140      19.362 -19.371 -28.777  1.00 83.94           C  
ATOM   4276  O   GLU C 140      22.163 -20.798 -28.787  1.00 83.94           O  
ATOM   4277  CG  GLU C 140      18.178 -18.564 -28.265  1.00 83.94           C  
ATOM   4278  CD  GLU C 140      17.379 -17.900 -29.375  1.00 83.94           C  
ATOM   4279  OE1 GLU C 140      16.285 -17.359 -29.095  1.00 83.94           O  
ATOM   4280  OE2 GLU C 140      17.850 -17.922 -30.534  1.00 83.94           O  
ATOM   4281  N   LEU C 141      20.710 -22.316 -28.067  1.00 91.95           N  
ATOM   4282  CA  LEU C 141      21.373 -23.453 -28.697  1.00 91.95           C  
ATOM   4283  C   LEU C 141      20.519 -24.026 -29.823  1.00 91.95           C  
ATOM   4284  CB  LEU C 141      21.670 -24.541 -27.662  1.00 91.95           C  
ATOM   4285  O   LEU C 141      19.339 -24.322 -29.623  1.00 91.95           O  
ATOM   4286  CG  LEU C 141      22.394 -25.786 -28.176  1.00 91.95           C  
ATOM   4287  CD1 LEU C 141      23.829 -25.443 -28.563  1.00 91.95           C  
ATOM   4288  CD2 LEU C 141      22.369 -26.892 -27.125  1.00 91.95           C  
ATOM   4289  N   THR C 142      21.130 -24.099 -30.985  1.00 90.33           N  
ATOM   4290  CA  THR C 142      20.403 -24.649 -32.123  1.00 90.33           C  
ATOM   4291  C   THR C 142      21.138 -25.853 -32.706  1.00 90.33           C  
ATOM   4292  CB  THR C 142      20.198 -23.589 -33.221  1.00 90.33           C  
ATOM   4293  O   THR C 142      22.370 -25.907 -32.678  1.00 90.33           O  
ATOM   4294  CG2 THR C 142      19.270 -22.476 -32.745  1.00 90.33           C  
ATOM   4295  OG1 THR C 142      21.466 -23.021 -33.571  1.00 90.33           O  
ATOM   4296  N   ASP C 143      20.399 -26.888 -33.021  1.00 85.67           N  
ATOM   4297  CA  ASP C 143      20.916 -28.002 -33.809  1.00 85.67           C  
ATOM   4298  C   ASP C 143      20.405 -27.942 -35.247  1.00 85.67           C  
ATOM   4299  CB  ASP C 143      20.530 -29.337 -33.169  1.00 85.67           C  
ATOM   4300  O   ASP C 143      19.621 -27.057 -35.596  1.00 85.67           O  
ATOM   4301  CG  ASP C 143      21.079 -30.536 -33.922  1.00 85.67           C  
ATOM   4302  OD1 ASP C 143      21.791 -30.349 -34.932  1.00 85.67           O  
ATOM   4303  OD2 ASP C 143      20.794 -31.679 -33.503  1.00 85.67           O  
ATOM   4304  N   PRO C 144      20.853 -28.761 -36.179  1.00 77.25           N  
ATOM   4305  CA  PRO C 144      20.333 -28.637 -37.542  1.00 77.25           C  
ATOM   4306  C   PRO C 144      18.814 -28.771 -37.609  1.00 77.25           C  
ATOM   4307  CB  PRO C 144      21.016 -29.788 -38.286  1.00 77.25           C  
ATOM   4308  O   PRO C 144      18.186 -28.266 -38.543  1.00 77.25           O  
ATOM   4309  CG  PRO C 144      22.173 -30.169 -37.420  1.00 77.25           C  
ATOM   4310  CD  PRO C 144      21.881 -29.732 -36.013  1.00 77.25           C  
ATOM   4311  N   ASP C 145      18.121 -29.296 -36.608  1.00 80.28           N  
ATOM   4312  CA  ASP C 145      16.693 -29.594 -36.640  1.00 80.28           C  
ATOM   4313  C   ASP C 145      15.889 -28.503 -35.935  1.00 80.28           C  
ATOM   4314  CB  ASP C 145      16.414 -30.953 -35.994  1.00 80.28           C  
ATOM   4315  O   ASP C 145      14.657 -28.511 -35.972  1.00 80.28           O  
ATOM   4316  CG  ASP C 145      17.042 -32.109 -36.752  1.00 80.28           C  
ATOM   4317  OD1 ASP C 145      17.034 -32.096 -38.002  1.00 80.28           O  
ATOM   4318  OD2 ASP C 145      17.548 -33.043 -36.093  1.00 80.28           O  
ATOM   4319  N   GLY C 146      16.580 -27.526 -35.285  1.00 81.33           N  
ATOM   4320  CA  GLY C 146      15.859 -26.457 -34.611  1.00 81.33           C  
ATOM   4321  C   GLY C 146      16.439 -26.112 -33.252  1.00 81.33           C  
ATOM   4322  O   GLY C 146      17.507 -26.605 -32.884  1.00 81.33           O  
ATOM   4323  N   ALA C 147      15.656 -25.196 -32.521  1.00 84.86           N  
ATOM   4324  CA  ALA C 147      16.089 -24.600 -31.260  1.00 84.86           C  
ATOM   4325  C   ALA C 147      15.939 -25.588 -30.107  1.00 84.86           C  
ATOM   4326  CB  ALA C 147      15.297 -23.327 -30.973  1.00 84.86           C  
ATOM   4327  O   ALA C 147      14.972 -26.352 -30.057  1.00 84.86           O  
ATOM   4328  N   VAL C 148      16.974 -25.672 -29.242  1.00 86.28           N  
ATOM   4329  CA  VAL C 148      16.990 -26.497 -28.039  1.00 86.28           C  
ATOM   4330  C   VAL C 148      16.973 -25.605 -26.800  1.00 86.28           C  
ATOM   4331  CB  VAL C 148      18.220 -27.431 -28.007  1.00 86.28           C  
ATOM   4332  O   VAL C 148      17.782 -24.682 -26.680  1.00 86.28           O  
ATOM   4333  CG1 VAL C 148      18.225 -28.275 -26.733  1.00 86.28           C  
ATOM   4334  CG2 VAL C 148      18.243 -28.326 -29.245  1.00 86.28           C  
ATOM   4335  N   ASP C 149      16.065 -25.862 -25.900  1.00 82.36           N  
ATOM   4336  CA  ASP C 149      15.922 -25.058 -24.690  1.00 82.36           C  
ATOM   4337  C   ASP C 149      16.976 -25.437 -23.652  1.00 82.36           C  
ATOM   4338  CB  ASP C 149      14.519 -25.222 -24.100  1.00 82.36           C  
ATOM   4339  O   ASP C 149      17.157 -26.617 -23.345  1.00 82.36           O  
ATOM   4340  CG  ASP C 149      13.490 -24.320 -24.758  1.00 82.36           C  
ATOM   4341  OD1 ASP C 149      13.879 -23.362 -25.461  1.00 82.36           O  
ATOM   4342  OD2 ASP C 149      12.280 -24.567 -24.569  1.00 82.36           O  
ATOM   4343  N   LEU C 150      17.674 -24.417 -23.082  1.00 82.67           N  
ATOM   4344  CA  LEU C 150      18.619 -24.617 -21.988  1.00 82.67           C  
ATOM   4345  C   LEU C 150      18.176 -23.858 -20.741  1.00 82.67           C  
ATOM   4346  CB  LEU C 150      20.022 -24.167 -22.402  1.00 82.67           C  
ATOM   4347  O   LEU C 150      17.672 -22.736 -20.839  1.00 82.67           O  
ATOM   4348  CG  LEU C 150      20.681 -24.957 -23.534  1.00 82.67           C  
ATOM   4349  CD1 LEU C 150      21.969 -24.272 -23.977  1.00 82.67           C  
ATOM   4350  CD2 LEU C 150      20.955 -26.391 -23.096  1.00 82.67           C  
ATOM   4351  N   THR C 151      18.299 -24.523 -19.603  1.00 77.41           N  
ATOM   4352  CA  THR C 151      18.195 -23.759 -18.365  1.00 77.41           C  
ATOM   4353  C   THR C 151      19.407 -22.849 -18.187  1.00 77.41           C  
ATOM   4354  CB  THR C 151      18.062 -24.687 -17.144  1.00 77.41           C  
ATOM   4355  O   THR C 151      20.398 -22.978 -18.909  1.00 77.41           O  
ATOM   4356  CG2 THR C 151      16.924 -25.685 -17.332  1.00 77.41           C  
ATOM   4357  OG1 THR C 151      19.288 -25.407 -16.964  1.00 77.41           O  
ATOM   4358  N   SER C 152      19.404 -21.902 -17.214  1.00 69.31           N  
ATOM   4359  CA  SER C 152      20.518 -21.007 -16.918  1.00 69.31           C  
ATOM   4360  C   SER C 152      21.767 -21.790 -16.529  1.00 69.31           C  
ATOM   4361  CB  SER C 152      20.143 -20.038 -15.796  1.00 69.31           C  
ATOM   4362  O   SER C 152      22.871 -21.468 -16.973  1.00 69.31           O  
ATOM   4363  OG  SER C 152      19.043 -19.229 -16.176  1.00 69.31           O  
ATOM   4364  N   GLY C 153      21.522 -22.819 -15.732  1.00 76.56           N  
ATOM   4365  CA  GLY C 153      22.622 -23.675 -15.316  1.00 76.56           C  
ATOM   4366  C   GLY C 153      23.228 -24.465 -16.460  1.00 76.56           C  
ATOM   4367  O   GLY C 153      24.452 -24.560 -16.576  1.00 76.56           O  
ATOM   4368  N   GLU C 154      22.417 -24.942 -17.382  1.00 87.42           N  
ATOM   4369  CA  GLU C 154      22.873 -25.700 -18.544  1.00 87.42           C  
ATOM   4370  C   GLU C 154      23.663 -24.816 -19.504  1.00 87.42           C  
ATOM   4371  CB  GLU C 154      21.686 -26.337 -19.270  1.00 87.42           C  
ATOM   4372  O   GLU C 154      24.698 -25.232 -20.030  1.00 87.42           O  
ATOM   4373  CG  GLU C 154      21.013 -27.455 -18.488  1.00 87.42           C  
ATOM   4374  CD  GLU C 154      19.608 -27.768 -18.976  1.00 87.42           C  
ATOM   4375  OE1 GLU C 154      19.010 -28.764 -18.508  1.00 87.42           O  
ATOM   4376  OE2 GLU C 154      19.100 -27.012 -19.834  1.00 87.42           O  
ATOM   4377  N   PHE C 155      23.137 -23.630 -19.680  1.00 86.14           N  
ATOM   4378  CA  PHE C 155      23.808 -22.684 -20.563  1.00 86.14           C  
ATOM   4379  C   PHE C 155      25.191 -22.331 -20.029  1.00 86.14           C  
ATOM   4380  CB  PHE C 155      22.969 -21.413 -20.728  1.00 86.14           C  
ATOM   4381  O   PHE C 155      26.171 -22.338 -20.776  1.00 86.14           O  
ATOM   4382  CG  PHE C 155      23.622 -20.361 -21.583  1.00 86.14           C  
ATOM   4383  CD1 PHE C 155      24.381 -19.349 -21.007  1.00 86.14           C  
ATOM   4384  CD2 PHE C 155      23.478 -20.384 -22.964  1.00 86.14           C  
ATOM   4385  CE1 PHE C 155      24.987 -18.374 -21.796  1.00 86.14           C  
ATOM   4386  CE2 PHE C 155      24.081 -19.413 -23.759  1.00 86.14           C  
ATOM   4387  CZ  PHE C 155      24.834 -18.408 -23.173  1.00 86.14           C  
ATOM   4388  N   ALA C 156      25.228 -22.017 -18.794  1.00 85.31           N  
ATOM   4389  CA  ALA C 156      26.492 -21.648 -18.163  1.00 85.31           C  
ATOM   4390  C   ALA C 156      27.513 -22.776 -18.278  1.00 85.31           C  
ATOM   4391  CB  ALA C 156      26.268 -21.284 -16.697  1.00 85.31           C  
ATOM   4392  O   ALA C 156      28.692 -22.529 -18.542  1.00 85.31           O  
ATOM   4393  N   LEU C 157      26.994 -23.983 -18.062  1.00 90.52           N  
ATOM   4394  CA  LEU C 157      27.845 -25.165 -18.145  1.00 90.52           C  
ATOM   4395  C   LEU C 157      28.348 -25.374 -19.569  1.00 90.52           C  
ATOM   4396  CB  LEU C 157      27.086 -26.407 -17.672  1.00 90.52           C  
ATOM   4397  O   LEU C 157      29.541 -25.599 -19.784  1.00 90.52           O  
ATOM   4398  CG  LEU C 157      27.917 -27.675 -17.471  1.00 90.52           C  
ATOM   4399  CD1 LEU C 157      29.010 -27.433 -16.435  1.00 90.52           C  
ATOM   4400  CD2 LEU C 157      27.026 -28.839 -17.054  1.00 90.52           C  
ATOM   4401  N   LEU C 158      27.500 -25.309 -20.508  1.00 93.66           N  
ATOM   4402  CA  LEU C 158      27.865 -25.473 -21.911  1.00 93.66           C  
ATOM   4403  C   LEU C 158      28.842 -24.386 -22.349  1.00 93.66           C  
ATOM   4404  CB  LEU C 158      26.618 -25.442 -22.797  1.00 93.66           C  
ATOM   4405  O   LEU C 158      29.809 -24.665 -23.061  1.00 93.66           O  
ATOM   4406  CG  LEU C 158      26.843 -25.666 -24.293  1.00 93.66           C  
ATOM   4407  CD1 LEU C 158      27.561 -26.990 -24.529  1.00 93.66           C  
ATOM   4408  CD2 LEU C 158      25.517 -25.630 -25.046  1.00 93.66           C  
ATOM   4409  N   LYS C 159      28.582 -23.185 -21.942  1.00 90.72           N  
ATOM   4410  CA  LYS C 159      29.480 -22.072 -22.239  1.00 90.72           C  
ATOM   4411  C   LYS C 159      30.881 -22.337 -21.696  1.00 90.72           C  
ATOM   4412  CB  LYS C 159      28.930 -20.769 -21.658  1.00 90.72           C  
ATOM   4413  O   LYS C 159      31.875 -22.101 -22.386  1.00 90.72           O  
ATOM   4414  CG  LYS C 159      29.795 -19.550 -21.945  1.00 90.72           C  
ATOM   4415  CD  LYS C 159      29.233 -18.298 -21.284  1.00 90.72           C  
ATOM   4416  CE  LYS C 159      30.137 -17.093 -21.508  1.00 90.72           C  
ATOM   4417  NZ  LYS C 159      30.145 -16.180 -20.326  1.00 90.72           N  
ATOM   4418  N   ALA C 160      30.953 -22.795 -20.488  1.00 91.63           N  
ATOM   4419  CA  ALA C 160      32.238 -23.109 -19.870  1.00 91.63           C  
ATOM   4420  C   ALA C 160      33.004 -24.143 -20.690  1.00 91.63           C  
ATOM   4421  CB  ALA C 160      32.034 -23.611 -18.443  1.00 91.63           C  
ATOM   4422  O   ALA C 160      34.213 -24.011 -20.894  1.00 91.63           O  
ATOM   4423  N   PHE C 161      32.305 -25.062 -21.264  1.00 95.06           N  
ATOM   4424  CA  PHE C 161      32.926 -26.133 -22.033  1.00 95.06           C  
ATOM   4425  C   PHE C 161      33.394 -25.624 -23.391  1.00 95.06           C  
ATOM   4426  CB  PHE C 161      31.951 -27.300 -22.217  1.00 95.06           C  
ATOM   4427  O   PHE C 161      34.529 -25.881 -23.799  1.00 95.06           O  
ATOM   4428  CG  PHE C 161      31.913 -28.250 -21.050  1.00 95.06           C  
ATOM   4429  CD1 PHE C 161      33.075 -28.865 -20.599  1.00 95.06           C  
ATOM   4430  CD2 PHE C 161      30.716 -28.527 -20.404  1.00 95.06           C  
ATOM   4431  CE1 PHE C 161      33.043 -29.744 -19.519  1.00 95.06           C  
ATOM   4432  CE2 PHE C 161      30.676 -29.405 -19.325  1.00 95.06           C  
ATOM   4433  CZ  PHE C 161      31.840 -30.013 -18.884  1.00 95.06           C  
ATOM   4434  N   VAL C 162      32.529 -24.879 -24.044  1.00 93.13           N  
ATOM   4435  CA  VAL C 162      32.787 -24.514 -25.433  1.00 93.13           C  
ATOM   4436  C   VAL C 162      33.861 -23.430 -25.492  1.00 93.13           C  
ATOM   4437  CB  VAL C 162      31.502 -24.030 -26.142  1.00 93.13           C  
ATOM   4438  O   VAL C 162      34.541 -23.275 -26.509  1.00 93.13           O  
ATOM   4439  CG1 VAL C 162      30.959 -25.112 -27.074  1.00 93.13           C  
ATOM   4440  CG2 VAL C 162      30.446 -23.627 -25.114  1.00 93.13           C  
ATOM   4441  N   GLU C 163      34.040 -22.670 -24.486  1.00 90.22           N  
ATOM   4442  CA  GLU C 163      35.071 -21.638 -24.439  1.00 90.22           C  
ATOM   4443  C   GLU C 163      36.442 -22.242 -24.146  1.00 90.22           C  
ATOM   4444  CB  GLU C 163      34.726 -20.581 -23.387  1.00 90.22           C  
ATOM   4445  O   GLU C 163      37.471 -21.615 -24.409  1.00 90.22           O  
ATOM   4446  CG  GLU C 163      33.620 -19.627 -23.814  1.00 90.22           C  
ATOM   4447  CD  GLU C 163      33.311 -18.562 -22.774  1.00 90.22           C  
ATOM   4448  OE1 GLU C 163      32.711 -17.522 -23.129  1.00 90.22           O  
ATOM   4449  OE2 GLU C 163      33.674 -18.768 -21.594  1.00 90.22           O  
ATOM   4450  N   ARG C 164      36.360 -23.473 -23.686  1.00 92.20           N  
ATOM   4451  CA  ARG C 164      37.606 -24.155 -23.351  1.00 92.20           C  
ATOM   4452  C   ARG C 164      37.619 -25.576 -23.906  1.00 92.20           C  
ATOM   4453  CB  ARG C 164      37.814 -24.182 -21.836  1.00 92.20           C  
ATOM   4454  O   ARG C 164      37.672 -26.544 -23.145  1.00 92.20           O  
ATOM   4455  CG  ARG C 164      37.906 -22.803 -21.202  1.00 92.20           C  
ATOM   4456  CD  ARG C 164      37.840 -22.875 -19.683  1.00 92.20           C  
ATOM   4457  NE  ARG C 164      37.929 -21.550 -19.076  1.00 92.20           N  
ATOM   4458  NH1 ARG C 164      35.723 -20.991 -19.478  1.00 92.20           N  
ATOM   4459  NH2 ARG C 164      37.113 -19.506 -18.420  1.00 92.20           N  
ATOM   4460  CZ  ARG C 164      36.921 -20.685 -18.993  1.00 92.20           C  
ATOM   4461  N   PRO C 165      37.571 -25.746 -25.227  1.00 92.60           N  
ATOM   4462  CA  PRO C 165      37.486 -27.093 -25.797  1.00 92.60           C  
ATOM   4463  C   PRO C 165      38.751 -27.915 -25.561  1.00 92.60           C  
ATOM   4464  CB  PRO C 165      37.276 -26.831 -27.291  1.00 92.60           C  
ATOM   4465  O   PRO C 165      39.845 -27.355 -25.455  1.00 92.60           O  
ATOM   4466  CG  PRO C 165      37.868 -25.479 -27.528  1.00 92.60           C  
ATOM   4467  CD  PRO C 165      37.732 -24.671 -26.269  1.00 92.60           C  
ATOM   4468  N   ARG C 166      38.695 -29.172 -25.342  1.00 91.01           N  
ATOM   4469  CA  ARG C 166      39.733 -30.190 -25.214  1.00 91.01           C  
ATOM   4470  C   ARG C 166      40.532 -29.998 -23.930  1.00 91.01           C  
ATOM   4471  CB  ARG C 166      40.670 -30.158 -26.424  1.00 91.01           C  
ATOM   4472  O   ARG C 166      41.703 -30.375 -23.859  1.00 91.01           O  
ATOM   4473  CG  ARG C 166      39.998 -30.539 -27.733  1.00 91.01           C  
ATOM   4474  CD  ARG C 166      41.016 -30.896 -28.807  1.00 91.01           C  
ATOM   4475  NE  ARG C 166      40.370 -31.361 -30.031  1.00 91.01           N  
ATOM   4476  NH1 ARG C 166      42.077 -30.689 -31.434  1.00 91.01           N  
ATOM   4477  NH2 ARG C 166      40.214 -31.709 -32.295  1.00 91.01           N  
ATOM   4478  CZ  ARG C 166      40.888 -31.252 -31.250  1.00 91.01           C  
ATOM   4479  N   ARG C 167      40.006 -29.244 -23.038  1.00 94.14           N  
ATOM   4480  CA  ARG C 167      40.614 -29.081 -21.722  1.00 94.14           C  
ATOM   4481  C   ARG C 167      39.799 -29.797 -20.650  1.00 94.14           C  
ATOM   4482  CB  ARG C 167      40.750 -27.597 -21.372  1.00 94.14           C  
ATOM   4483  O   ARG C 167      38.570 -29.710 -20.636  1.00 94.14           O  
ATOM   4484  CG  ARG C 167      41.875 -26.891 -22.112  1.00 94.14           C  
ATOM   4485  CD  ARG C 167      42.058 -25.460 -21.627  1.00 94.14           C  
ATOM   4486  NE  ARG C 167      43.325 -25.287 -20.922  1.00 94.14           N  
ATOM   4487  NH1 ARG C 167      42.911 -23.106 -20.284  1.00 94.14           N  
ATOM   4488  NH2 ARG C 167      44.877 -24.125 -19.691  1.00 94.14           N  
ATOM   4489  CZ  ARG C 167      43.701 -24.173 -20.301  1.00 94.14           C  
ATOM   4490  N   VAL C 168      40.520 -30.509 -19.784  1.00 94.87           N  
ATOM   4491  CA  VAL C 168      39.835 -31.170 -18.678  1.00 94.87           C  
ATOM   4492  C   VAL C 168      39.542 -30.159 -17.572  1.00 94.87           C  
ATOM   4493  CB  VAL C 168      40.667 -32.346 -18.118  1.00 94.87           C  
ATOM   4494  O   VAL C 168      40.450 -29.480 -17.087  1.00 94.87           O  
ATOM   4495  CG1 VAL C 168      39.940 -33.013 -16.951  1.00 94.87           C  
ATOM   4496  CG2 VAL C 168      40.962 -33.363 -19.219  1.00 94.87           C  
ATOM   4497  N   LEU C 169      38.231 -29.958 -17.266  1.00 95.93           N  
ATOM   4498  CA  LEU C 169      37.802 -29.072 -16.189  1.00 95.93           C  
ATOM   4499  C   LEU C 169      37.366 -29.873 -14.967  1.00 95.93           C  
ATOM   4500  CB  LEU C 169      36.655 -28.173 -16.659  1.00 95.93           C  
ATOM   4501  O   LEU C 169      36.561 -30.800 -15.082  1.00 95.93           O  
ATOM   4502  CG  LEU C 169      36.957 -27.254 -17.844  1.00 95.93           C  
ATOM   4503  CD1 LEU C 169      35.680 -26.570 -18.323  1.00 95.93           C  
ATOM   4504  CD2 LEU C 169      38.013 -26.221 -17.465  1.00 95.93           C  
ATOM   4505  N   SER C 170      37.990 -29.515 -13.838  1.00 93.63           N  
ATOM   4506  CA  SER C 170      37.606 -30.179 -12.597  1.00 93.63           C  
ATOM   4507  C   SER C 170      36.213 -29.750 -12.149  1.00 93.63           C  
ATOM   4508  CB  SER C 170      38.621 -29.879 -11.492  1.00 93.63           C  
ATOM   4509  O   SER C 170      35.691 -28.735 -12.613  1.00 93.63           O  
ATOM   4510  OG  SER C 170      38.523 -28.529 -11.073  1.00 93.63           O  
ATOM   4511  N   ARG C 171      35.581 -30.508 -11.319  1.00 88.36           N  
ATOM   4512  CA  ARG C 171      34.264 -30.192 -10.775  1.00 88.36           C  
ATOM   4513  C   ARG C 171      34.274 -28.843 -10.064  1.00 88.36           C  
ATOM   4514  CB  ARG C 171      33.802 -31.288  -9.812  1.00 88.36           C  
ATOM   4515  O   ARG C 171      33.335 -28.056 -10.201  1.00 88.36           O  
ATOM   4516  CG  ARG C 171      33.449 -32.600 -10.495  1.00 88.36           C  
ATOM   4517  CD  ARG C 171      33.089 -33.682  -9.486  1.00 88.36           C  
ATOM   4518  NE  ARG C 171      32.602 -34.891 -10.144  1.00 88.36           N  
ATOM   4519  NH1 ARG C 171      34.686 -35.597 -10.847  1.00 88.36           N  
ATOM   4520  NH2 ARG C 171      32.824 -36.839 -11.339  1.00 88.36           N  
ATOM   4521  CZ  ARG C 171      33.371 -35.773 -10.775  1.00 88.36           C  
ATOM   4522  N   ASP C 172      35.375 -28.561  -9.375  1.00 84.51           N  
ATOM   4523  CA  ASP C 172      35.533 -27.280  -8.695  1.00 84.51           C  
ATOM   4524  C   ASP C 172      35.669 -26.138  -9.700  1.00 84.51           C  
ATOM   4525  CB  ASP C 172      36.748 -27.310  -7.766  1.00 84.51           C  
ATOM   4526  O   ASP C 172      35.100 -25.062  -9.506  1.00 84.51           O  
ATOM   4527  CG  ASP C 172      36.508 -28.116  -6.502  1.00 84.51           C  
ATOM   4528  OD1 ASP C 172      35.337 -28.273  -6.092  1.00 84.51           O  
ATOM   4529  OD2 ASP C 172      37.498 -28.595  -5.908  1.00 84.51           O  
ATOM   4530  N   GLN C 173      36.350 -26.349 -10.750  1.00 88.09           N  
ATOM   4531  CA  GLN C 173      36.503 -25.342 -11.795  1.00 88.09           C  
ATOM   4532  C   GLN C 173      35.165 -25.034 -12.461  1.00 88.09           C  
ATOM   4533  CB  GLN C 173      37.517 -25.803 -12.843  1.00 88.09           C  
ATOM   4534  O   GLN C 173      34.853 -23.872 -12.732  1.00 88.09           O  
ATOM   4535  CG  GLN C 173      38.963 -25.740 -12.368  1.00 88.09           C  
ATOM   4536  CD  GLN C 173      39.942 -26.274 -13.397  1.00 88.09           C  
ATOM   4537  NE2 GLN C 173      41.145 -25.710 -13.419  1.00 88.09           N  
ATOM   4538  OE1 GLN C 173      39.620 -27.186 -14.165  1.00 88.09           O  
ATOM   4539  N   LEU C 174      34.462 -26.132 -12.714  1.00 89.89           N  
ATOM   4540  CA  LEU C 174      33.155 -25.958 -13.337  1.00 89.89           C  
ATOM   4541  C   LEU C 174      32.206 -25.206 -12.410  1.00 89.89           C  
ATOM   4542  CB  LEU C 174      32.553 -27.316 -13.709  1.00 89.89           C  
ATOM   4543  O   LEU C 174      31.437 -24.354 -12.860  1.00 89.89           O  
ATOM   4544  CG  LEU C 174      33.191 -28.037 -14.898  1.00 89.89           C  
ATOM   4545  CD1 LEU C 174      32.646 -29.457 -15.011  1.00 89.89           C  
ATOM   4546  CD2 LEU C 174      32.949 -27.261 -16.188  1.00 89.89           C  
ATOM   4547  N   LEU C 175      32.375 -25.605 -11.197  1.00 83.10           N  
ATOM   4548  CA  LEU C 175      31.574 -24.898 -10.205  1.00 83.10           C  
ATOM   4549  C   LEU C 175      31.919 -23.413 -10.184  1.00 83.10           C  
ATOM   4550  CB  LEU C 175      31.786 -25.503  -8.814  1.00 83.10           C  
ATOM   4551  O   LEU C 175      31.026 -22.564 -10.137  1.00 83.10           O  
ATOM   4552  CG  LEU C 175      30.970 -26.754  -8.487  1.00 83.10           C  
ATOM   4553  CD1 LEU C 175      31.533 -27.446  -7.251  1.00 83.10           C  
ATOM   4554  CD2 LEU C 175      29.501 -26.397  -8.285  1.00 83.10           C  
ATOM   4555  N   ASP C 176      33.159 -23.085 -10.169  1.00 80.44           N  
ATOM   4556  CA  ASP C 176      33.636 -21.705 -10.147  1.00 80.44           C  
ATOM   4557  C   ASP C 176      33.228 -20.963 -11.418  1.00 80.44           C  
ATOM   4558  CB  ASP C 176      35.156 -21.665  -9.980  1.00 80.44           C  
ATOM   4559  O   ASP C 176      32.830 -19.798 -11.362  1.00 80.44           O  
ATOM   4560  CG  ASP C 176      35.604 -21.965  -8.560  1.00 80.44           C  
ATOM   4561  OD1 ASP C 176      34.762 -21.941  -7.637  1.00 80.44           O  
ATOM   4562  OD2 ASP C 176      36.811 -22.224  -8.362  1.00 80.44           O  
ATOM   4563  N   LEU C 177      33.221 -21.625 -12.484  1.00 82.29           N  
ATOM   4564  CA  LEU C 177      32.940 -21.003 -13.774  1.00 82.29           C  
ATOM   4565  C   LEU C 177      31.442 -20.787 -13.958  1.00 82.29           C  
ATOM   4566  CB  LEU C 177      33.488 -21.864 -14.915  1.00 82.29           C  
ATOM   4567  O   LEU C 177      31.026 -19.904 -14.712  1.00 82.29           O  
ATOM   4568  CG  LEU C 177      35.007 -21.873 -15.089  1.00 82.29           C  
ATOM   4569  CD1 LEU C 177      35.425 -22.987 -16.042  1.00 82.29           C  
ATOM   4570  CD2 LEU C 177      35.496 -20.519 -15.593  1.00 82.29           C  
ATOM   4571  N   THR C 178      30.693 -21.629 -13.206  1.00 80.14           N  
ATOM   4572  CA  THR C 178      29.251 -21.563 -13.411  1.00 80.14           C  
ATOM   4573  C   THR C 178      28.583 -20.750 -12.306  1.00 80.14           C  
ATOM   4574  CB  THR C 178      28.629 -22.971 -13.463  1.00 80.14           C  
ATOM   4575  O   THR C 178      27.402 -20.412 -12.404  1.00 80.14           O  
ATOM   4576  CG2 THR C 178      29.162 -23.764 -14.651  1.00 80.14           C  
ATOM   4577  OG1 THR C 178      28.945 -23.672 -12.254  1.00 80.14           O  
ATOM   4578  N   ARG C 179      29.235 -20.467 -11.086  1.00 65.08           N  
ATOM   4579  CA  ARG C 179      28.725 -19.729  -9.935  1.00 65.08           C  
ATOM   4580  C   ARG C 179      28.405 -18.285 -10.308  1.00 65.08           C  
ATOM   4581  CB  ARG C 179      29.733 -19.762  -8.784  1.00 65.08           C  
ATOM   4582  O   ARG C 179      27.775 -17.563  -9.532  1.00 65.08           O  
ATOM   4583  CG  ARG C 179      29.443 -20.831  -7.742  1.00 65.08           C  
ATOM   4584  CD  ARG C 179      30.242 -20.605  -6.466  1.00 65.08           C  
ATOM   4585  NE  ARG C 179      31.116 -21.736  -6.170  1.00 65.08           N  
ATOM   4586  NH1 ARG C 179      32.135 -20.740  -4.352  1.00 65.08           N  
ATOM   4587  NH2 ARG C 179      32.742 -22.855  -4.995  1.00 65.08           N  
ATOM   4588  CZ  ARG C 179      31.996 -21.774  -5.173  1.00 65.08           C  
ATOM   4589  N   GLY C 180      28.493 -17.920 -11.562  1.00 53.57           N  
ATOM   4590  CA  GLY C 180      28.030 -16.567 -11.824  1.00 53.57           C  
ATOM   4591  C   GLY C 180      26.547 -16.382 -11.563  1.00 53.57           C  
ATOM   4592  O   GLY C 180      25.904 -17.247 -10.963  1.00 53.57           O  
ATOM   4593  N   ARG C 181      25.892 -15.155 -11.241  1.00 44.09           N  
ATOM   4594  CA  ARG C 181      24.544 -14.717 -10.894  1.00 44.09           C  
ATOM   4595  C   ARG C 181      23.509 -15.764 -11.289  1.00 44.09           C  
ATOM   4596  CB  ARG C 181      24.223 -13.382 -11.569  1.00 44.09           C  
ATOM   4597  O   ARG C 181      22.358 -15.705 -10.850  1.00 44.09           O  
ATOM   4598  CG  ARG C 181      24.450 -12.170 -10.679  1.00 44.09           C  
ATOM   4599  CD  ARG C 181      24.033 -10.878 -11.367  1.00 44.09           C  
ATOM   4600  NE  ARG C 181      24.366  -9.707 -10.561  1.00 44.09           N  
ATOM   4601  NH1 ARG C 181      23.112  -8.229 -11.819  1.00 44.09           N  
ATOM   4602  NH2 ARG C 181      24.288  -7.482  -9.998  1.00 44.09           N  
ATOM   4603  CZ  ARG C 181      23.921  -8.475 -10.794  1.00 44.09           C  
ATOM   4604  N   ASP C 182      23.815 -17.000 -11.944  1.00 46.52           N  
ATOM   4605  CA  ASP C 182      22.865 -17.844 -12.663  1.00 46.52           C  
ATOM   4606  C   ASP C 182      22.757 -19.223 -12.017  1.00 46.52           C  
ATOM   4607  CB  ASP C 182      23.274 -17.981 -14.131  1.00 46.52           C  
ATOM   4608  O   ASP C 182      22.042 -20.094 -12.517  1.00 46.52           O  
ATOM   4609  CG  ASP C 182      23.157 -16.679 -14.904  1.00 46.52           C  
ATOM   4610  OD1 ASP C 182      22.227 -15.889 -14.631  1.00 46.52           O  
ATOM   4611  OD2 ASP C 182      24.000 -16.442 -15.795  1.00 46.52           O  
ATOM   4612  N   ALA C 183      23.470 -19.448 -10.808  1.00 44.21           N  
ATOM   4613  CA  ALA C 183      23.315 -20.800 -10.279  1.00 44.21           C  
ATOM   4614  C   ALA C 183      22.137 -20.880  -9.311  1.00 44.21           C  
ATOM   4615  CB  ALA C 183      24.599 -21.252  -9.588  1.00 44.21           C  
ATOM   4616  O   ALA C 183      21.960 -19.999  -8.467  1.00 44.21           O  
ATOM   4617  N   ASP C 184      20.931 -21.203  -9.781  1.00 46.47           N  
ATOM   4618  CA  ASP C 184      19.840 -21.587  -8.890  1.00 46.47           C  
ATOM   4619  C   ASP C 184      20.370 -22.306  -7.651  1.00 46.47           C  
ATOM   4620  CB  ASP C 184      18.835 -22.477  -9.625  1.00 46.47           C  
ATOM   4621  O   ASP C 184      21.332 -23.072  -7.735  1.00 46.47           O  
ATOM   4622  CG  ASP C 184      17.917 -21.696 -10.549  1.00 46.47           C  
ATOM   4623  OD1 ASP C 184      17.753 -20.473 -10.355  1.00 46.47           O  
ATOM   4624  OD2 ASP C 184      17.350 -22.312 -11.477  1.00 46.47           O  
ATOM   4625  N   ALA C 185      20.308 -21.681  -6.499  1.00 48.99           N  
ATOM   4626  CA  ALA C 185      20.610 -22.220  -5.175  1.00 48.99           C  
ATOM   4627  C   ALA C 185      20.152 -23.671  -5.056  1.00 48.99           C  
ATOM   4628  CB  ALA C 185      19.954 -21.368  -4.092  1.00 48.99           C  
ATOM   4629  O   ALA C 185      20.721 -24.446  -4.284  1.00 48.99           O  
ATOM   4630  N   PHE C 186      19.362 -24.220  -6.151  1.00 43.92           N  
ATOM   4631  CA  PHE C 186      18.897 -25.567  -5.843  1.00 43.92           C  
ATOM   4632  C   PHE C 186      19.588 -26.594  -6.733  1.00 43.92           C  
ATOM   4633  CB  PHE C 186      17.378 -25.665  -6.011  1.00 43.92           C  
ATOM   4634  O   PHE C 186      19.394 -27.800  -6.564  1.00 43.92           O  
ATOM   4635  CG  PHE C 186      16.602 -25.141  -4.833  1.00 43.92           C  
ATOM   4636  CD1 PHE C 186      16.364 -25.947  -3.726  1.00 43.92           C  
ATOM   4637  CD2 PHE C 186      16.111 -23.842  -4.832  1.00 43.92           C  
ATOM   4638  CE1 PHE C 186      15.646 -25.465  -2.634  1.00 43.92           C  
ATOM   4639  CE2 PHE C 186      15.393 -23.354  -3.744  1.00 43.92           C  
ATOM   4640  CZ  PHE C 186      15.161 -24.167  -2.647  1.00 43.92           C  
ATOM   4641  N   ASP C 187      20.600 -26.180  -7.632  1.00 50.79           N  
ATOM   4642  CA  ASP C 187      21.209 -27.268  -8.391  1.00 50.79           C  
ATOM   4643  C   ASP C 187      22.575 -27.640  -7.818  1.00 50.79           C  
ATOM   4644  CB  ASP C 187      21.345 -26.883  -9.865  1.00 50.79           C  
ATOM   4645  O   ASP C 187      23.513 -26.840  -7.865  1.00 50.79           O  
ATOM   4646  CG  ASP C 187      20.379 -27.634 -10.765  1.00 50.79           C  
ATOM   4647  OD1 ASP C 187      19.763 -28.622 -10.309  1.00 50.79           O  
ATOM   4648  OD2 ASP C 187      20.234 -27.236 -11.941  1.00 50.79           O  
ATOM   4649  N   ARG C 188      22.713 -28.263  -6.654  1.00 58.71           N  
ATOM   4650  CA  ARG C 188      23.959 -28.313  -5.897  1.00 58.71           C  
ATOM   4651  C   ARG C 188      24.925 -29.329  -6.498  1.00 58.71           C  
ATOM   4652  CB  ARG C 188      23.685 -28.655  -4.431  1.00 58.71           C  
ATOM   4653  O   ARG C 188      26.137 -29.240  -6.290  1.00 58.71           O  
ATOM   4654  CG  ARG C 188      23.042 -27.523  -3.644  1.00 58.71           C  
ATOM   4655  CD  ARG C 188      22.897 -27.873  -2.170  1.00 58.71           C  
ATOM   4656  NE  ARG C 188      21.947 -26.991  -1.498  1.00 58.71           N  
ATOM   4657  NH1 ARG C 188      22.387 -27.792   0.624  1.00 58.71           N  
ATOM   4658  NH2 ARG C 188      20.839 -26.129   0.320  1.00 58.71           N  
ATOM   4659  CZ  ARG C 188      21.726 -26.973  -0.186  1.00 58.71           C  
ATOM   4660  N   SER C 189      24.589 -29.985  -7.778  1.00 75.11           N  
ATOM   4661  CA  SER C 189      25.700 -30.869  -8.116  1.00 75.11           C  
ATOM   4662  C   SER C 189      26.057 -30.767  -9.595  1.00 75.11           C  
ATOM   4663  CB  SER C 189      25.358 -32.318  -7.764  1.00 75.11           C  
ATOM   4664  O   SER C 189      25.172 -30.711 -10.451  1.00 75.11           O  
ATOM   4665  OG  SER C 189      24.625 -32.930  -8.812  1.00 75.11           O  
ATOM   4666  N   ILE C 190      27.275 -30.382 -10.055  1.00 84.75           N  
ATOM   4667  CA  ILE C 190      27.837 -30.345 -11.400  1.00 84.75           C  
ATOM   4668  C   ILE C 190      27.513 -31.645 -12.132  1.00 84.75           C  
ATOM   4669  CB  ILE C 190      29.365 -30.115 -11.368  1.00 84.75           C  
ATOM   4670  O   ILE C 190      27.169 -31.629 -13.316  1.00 84.75           O  
ATOM   4671  CG1 ILE C 190      29.680 -28.681 -10.927  1.00 84.75           C  
ATOM   4672  CG2 ILE C 190      29.985 -30.416 -12.735  1.00 84.75           C  
ATOM   4673  CD1 ILE C 190      29.123 -27.611 -11.855  1.00 84.75           C  
ATOM   4674  N   ASP C 191      27.318 -32.709 -11.429  1.00 85.80           N  
ATOM   4675  CA  ASP C 191      27.060 -34.011 -12.037  1.00 85.80           C  
ATOM   4676  C   ASP C 191      25.633 -34.092 -12.575  1.00 85.80           C  
ATOM   4677  CB  ASP C 191      27.306 -35.134 -11.027  1.00 85.80           C  
ATOM   4678  O   ASP C 191      25.402 -34.635 -13.657  1.00 85.80           O  
ATOM   4679  CG  ASP C 191      28.778 -35.343 -10.720  1.00 85.80           C  
ATOM   4680  OD1 ASP C 191      29.629 -35.065 -11.592  1.00 85.80           O  
ATOM   4681  OD2 ASP C 191      29.090 -35.793  -9.596  1.00 85.80           O  
ATOM   4682  N   VAL C 192      24.780 -33.558 -11.771  1.00 82.17           N  
ATOM   4683  CA  VAL C 192      23.380 -33.532 -12.184  1.00 82.17           C  
ATOM   4684  C   VAL C 192      23.225 -32.661 -13.428  1.00 82.17           C  
ATOM   4685  CB  VAL C 192      22.464 -33.015 -11.053  1.00 82.17           C  
ATOM   4686  O   VAL C 192      22.541 -33.044 -14.380  1.00 82.17           O  
ATOM   4687  CG1 VAL C 192      21.044 -32.788 -11.569  1.00 82.17           C  
ATOM   4688  CG2 VAL C 192      22.459 -33.994  -9.880  1.00 82.17           C  
ATOM   4689  N   GLN C 193      23.943 -31.518 -13.438  1.00 85.52           N  
ATOM   4690  CA  GLN C 193      23.884 -30.596 -14.567  1.00 85.52           C  
ATOM   4691  C   GLN C 193      24.506 -31.214 -15.816  1.00 85.52           C  
ATOM   4692  CB  GLN C 193      24.588 -29.282 -14.225  1.00 85.52           C  
ATOM   4693  O   GLN C 193      23.999 -31.032 -16.924  1.00 85.52           O  
ATOM   4694  CG  GLN C 193      23.836 -28.427 -13.214  1.00 85.52           C  
ATOM   4695  CD  GLN C 193      24.445 -27.047 -13.044  1.00 85.52           C  
ATOM   4696  NE2 GLN C 193      23.689 -26.136 -12.442  1.00 85.52           N  
ATOM   4697  OE1 GLN C 193      25.586 -26.804 -13.449  1.00 85.52           O  
ATOM   4698  N   ILE C 194      25.520 -31.992 -15.626  1.00 91.59           N  
ATOM   4699  CA  ILE C 194      26.193 -32.674 -16.726  1.00 91.59           C  
ATOM   4700  C   ILE C 194      25.257 -33.715 -17.337  1.00 91.59           C  
ATOM   4701  CB  ILE C 194      27.505 -33.342 -16.258  1.00 91.59           C  
ATOM   4702  O   ILE C 194      25.133 -33.804 -18.560  1.00 91.59           O  
ATOM   4703  CG1 ILE C 194      28.591 -32.285 -16.028  1.00 91.59           C  
ATOM   4704  CG2 ILE C 194      27.969 -34.391 -17.274  1.00 91.59           C  
ATOM   4705  CD1 ILE C 194      29.053 -31.585 -17.298  1.00 91.59           C  
ATOM   4706  N   SER C 195      24.632 -34.440 -16.455  1.00 87.93           N  
ATOM   4707  CA  SER C 195      23.696 -35.466 -16.904  1.00 87.93           C  
ATOM   4708  C   SER C 195      22.561 -34.859 -17.722  1.00 87.93           C  
ATOM   4709  CB  SER C 195      23.123 -36.229 -15.709  1.00 87.93           C  
ATOM   4710  O   SER C 195      22.201 -35.382 -18.778  1.00 87.93           O  
ATOM   4711  OG  SER C 195      22.210 -37.224 -16.139  1.00 87.93           O  
ATOM   4712  N   ARG C 196      21.993 -33.752 -17.377  1.00 88.80           N  
ATOM   4713  CA  ARG C 196      20.895 -33.068 -18.053  1.00 88.80           C  
ATOM   4714  C   ARG C 196      21.347 -32.500 -19.395  1.00 88.80           C  
ATOM   4715  CB  ARG C 196      20.335 -31.949 -17.173  1.00 88.80           C  
ATOM   4716  O   ARG C 196      20.623 -32.589 -20.388  1.00 88.80           O  
ATOM   4717  CG  ARG C 196      19.487 -32.445 -16.012  1.00 88.80           C  
ATOM   4718  CD  ARG C 196      18.916 -31.292 -15.198  1.00 88.80           C  
ATOM   4719  NE  ARG C 196      18.112 -31.770 -14.077  1.00 88.80           N  
ATOM   4720  NH1 ARG C 196      18.057 -29.737 -12.981  1.00 88.80           N  
ATOM   4721  NH2 ARG C 196      16.994 -31.558 -12.082  1.00 88.80           N  
ATOM   4722  CZ  ARG C 196      17.723 -31.021 -13.049  1.00 88.80           C  
ATOM   4723  N   LEU C 197      22.543 -31.926 -19.260  1.00 92.48           N  
ATOM   4724  CA  LEU C 197      23.078 -31.359 -20.493  1.00 92.48           C  
ATOM   4725  C   LEU C 197      23.354 -32.452 -21.519  1.00 92.48           C  
ATOM   4726  CB  LEU C 197      24.361 -30.574 -20.209  1.00 92.48           C  
ATOM   4727  O   LEU C 197      23.062 -32.284 -22.706  1.00 92.48           O  
ATOM   4728  CG  LEU C 197      24.938 -29.771 -21.376  1.00 92.48           C  
ATOM   4729  CD1 LEU C 197      23.888 -28.813 -21.930  1.00 92.48           C  
ATOM   4730  CD2 LEU C 197      26.185 -29.011 -20.939  1.00 92.48           C  
ATOM   4731  N   ARG C 198      23.839 -33.634 -21.193  1.00 94.06           N  
ATOM   4732  CA  ARG C 198      24.101 -34.769 -22.073  1.00 94.06           C  
ATOM   4733  C   ARG C 198      22.813 -35.271 -22.717  1.00 94.06           C  
ATOM   4734  CB  ARG C 198      24.778 -35.903 -21.301  1.00 94.06           C  
ATOM   4735  O   ARG C 198      22.805 -35.641 -23.893  1.00 94.06           O  
ATOM   4736  CG  ARG C 198      26.262 -35.684 -21.058  1.00 94.06           C  
ATOM   4737  CD  ARG C 198      26.868 -36.801 -20.221  1.00 94.06           C  
ATOM   4738  NE  ARG C 198      28.319 -36.670 -20.116  1.00 94.06           N  
ATOM   4739  NH1 ARG C 198      28.570 -38.380 -18.583  1.00 94.06           N  
ATOM   4740  NH2 ARG C 198      30.403 -37.218 -19.321  1.00 94.06           N  
ATOM   4741  CZ  ARG C 198      29.094 -37.423 -19.340  1.00 94.06           C  
ATOM   4742  N   ARG C 199      21.766 -35.223 -21.951  1.00 92.30           N  
ATOM   4743  CA  ARG C 199      20.485 -35.673 -22.484  1.00 92.30           C  
ATOM   4744  C   ARG C 199      20.041 -34.801 -23.654  1.00 92.30           C  
ATOM   4745  CB  ARG C 199      19.415 -35.667 -21.391  1.00 92.30           C  
ATOM   4746  O   ARG C 199      19.333 -35.266 -24.549  1.00 92.30           O  
ATOM   4747  CG  ARG C 199      19.452 -36.889 -20.486  1.00 92.30           C  
ATOM   4748  CD  ARG C 199      18.303 -36.886 -19.487  1.00 92.30           C  
ATOM   4749  NE  ARG C 199      18.535 -37.827 -18.396  1.00 92.30           N  
ATOM   4750  NH1 ARG C 199      16.932 -36.923 -16.999  1.00 92.30           N  
ATOM   4751  NH2 ARG C 199      18.170 -38.726 -16.314  1.00 92.30           N  
ATOM   4752  CZ  ARG C 199      17.879 -37.823 -17.239  1.00 92.30           C  
ATOM   4753  N   LYS C 200      20.623 -33.564 -23.618  1.00 90.77           N  
ATOM   4754  CA  LYS C 200      20.126 -32.600 -24.596  1.00 90.77           C  
ATOM   4755  C   LYS C 200      21.025 -32.555 -25.829  1.00 90.77           C  
ATOM   4756  CB  LYS C 200      20.022 -31.208 -23.972  1.00 90.77           C  
ATOM   4757  O   LYS C 200      20.541 -32.386 -26.950  1.00 90.77           O  
ATOM   4758  CG  LYS C 200      18.904 -31.070 -22.949  1.00 90.77           C  
ATOM   4759  CD  LYS C 200      18.785 -29.638 -22.441  1.00 90.77           C  
ATOM   4760  CE  LYS C 200      17.660 -29.497 -21.425  1.00 90.77           C  
ATOM   4761  NZ  LYS C 200      17.533 -28.094 -20.930  1.00 90.77           N  
ATOM   4762  N   ILE C 201      22.317 -32.821 -25.569  1.00 93.03           N  
ATOM   4763  CA  ILE C 201      23.186 -32.472 -26.688  1.00 93.03           C  
ATOM   4764  C   ILE C 201      23.879 -33.727 -27.213  1.00 93.03           C  
ATOM   4765  CB  ILE C 201      24.234 -31.412 -26.281  1.00 93.03           C  
ATOM   4766  O   ILE C 201      24.467 -33.712 -28.297  1.00 93.03           O  
ATOM   4767  CG1 ILE C 201      25.133 -31.951 -25.162  1.00 93.03           C  
ATOM   4768  CG2 ILE C 201      23.548 -30.111 -25.853  1.00 93.03           C  
ATOM   4769  CD1 ILE C 201      26.330 -31.064 -24.847  1.00 93.03           C  
ATOM   4770  N   GLU C 202      23.757 -34.818 -26.450  1.00 92.76           N  
ATOM   4771  CA  GLU C 202      24.405 -36.066 -26.842  1.00 92.76           C  
ATOM   4772  C   GLU C 202      23.419 -37.007 -27.530  1.00 92.76           C  
ATOM   4773  CB  GLU C 202      25.027 -36.755 -25.625  1.00 92.76           C  
ATOM   4774  O   GLU C 202      22.252 -37.085 -27.139  1.00 92.76           O  
ATOM   4775  CG  GLU C 202      26.160 -35.966 -24.984  1.00 92.76           C  
ATOM   4776  CD  GLU C 202      27.483 -36.110 -25.719  1.00 92.76           C  
ATOM   4777  OE1 GLU C 202      28.497 -35.538 -25.261  1.00 92.76           O  
ATOM   4778  OE2 GLU C 202      27.505 -36.801 -26.763  1.00 92.76           O  
ATOM   4779  N   PRO C 203      23.846 -37.630 -28.660  1.00 87.61           N  
ATOM   4780  CA  PRO C 203      22.983 -38.646 -29.267  1.00 87.61           C  
ATOM   4781  C   PRO C 203      22.620 -39.767 -28.297  1.00 87.61           C  
ATOM   4782  CB  PRO C 203      23.828 -39.179 -30.427  1.00 87.61           C  
ATOM   4783  O   PRO C 203      21.484 -40.249 -28.301  1.00 87.61           O  
ATOM   4784  CG  PRO C 203      24.920 -38.174 -30.598  1.00 87.61           C  
ATOM   4785  CD  PRO C 203      25.049 -37.388 -29.324  1.00 87.61           C  
ATOM   4786  N   ASP C 204      23.614 -40.245 -27.519  1.00 90.20           N  
ATOM   4787  CA  ASP C 204      23.444 -41.229 -26.454  1.00 90.20           C  
ATOM   4788  C   ASP C 204      24.070 -40.741 -25.150  1.00 90.20           C  
ATOM   4789  CB  ASP C 204      24.055 -42.571 -26.861  1.00 90.20           C  
ATOM   4790  O   ASP C 204      25.288 -40.809 -24.977  1.00 90.20           O  
ATOM   4791  CG  ASP C 204      23.823 -43.664 -25.833  1.00 90.20           C  
ATOM   4792  OD1 ASP C 204      23.174 -43.400 -24.798  1.00 90.20           O  
ATOM   4793  OD2 ASP C 204      24.296 -44.799 -26.059  1.00 90.20           O  
ATOM   4794  N   PRO C 205      23.251 -40.263 -24.182  1.00 90.26           N  
ATOM   4795  CA  PRO C 205      23.764 -39.724 -22.921  1.00 90.26           C  
ATOM   4796  C   PRO C 205      24.574 -40.746 -22.127  1.00 90.26           C  
ATOM   4797  CB  PRO C 205      22.493 -39.328 -22.164  1.00 90.26           C  
ATOM   4798  O   PRO C 205      25.433 -40.371 -21.326  1.00 90.26           O  
ATOM   4799  CG  PRO C 205      21.458 -39.142 -23.227  1.00 90.26           C  
ATOM   4800  CD  PRO C 205      21.783 -40.056 -24.374  1.00 90.26           C  
ATOM   4801  N   LYS C 206      24.339 -42.092 -22.257  1.00 87.32           N  
ATOM   4802  CA  LYS C 206      25.044 -43.147 -21.536  1.00 87.32           C  
ATOM   4803  C   LYS C 206      26.445 -43.359 -22.102  1.00 87.32           C  
ATOM   4804  CB  LYS C 206      24.253 -44.455 -21.590  1.00 87.32           C  
ATOM   4805  O   LYS C 206      27.343 -43.821 -21.395  1.00 87.32           O  
ATOM   4806  CG  LYS C 206      22.968 -44.436 -20.775  1.00 87.32           C  
ATOM   4807  CD  LYS C 206      22.281 -45.795 -20.784  1.00 87.32           C  
ATOM   4808  CE  LYS C 206      20.970 -45.764 -20.008  1.00 87.32           C  
ATOM   4809  NZ  LYS C 206      20.285 -47.091 -20.026  1.00 87.32           N  
ATOM   4810  N   ASN C 207      26.596 -43.024 -23.376  1.00 89.36           N  
ATOM   4811  CA  ASN C 207      27.903 -42.991 -24.024  1.00 89.36           C  
ATOM   4812  C   ASN C 207      28.216 -41.607 -24.586  1.00 89.36           C  
ATOM   4813  CB  ASN C 207      27.979 -44.044 -25.132  1.00 89.36           C  
ATOM   4814  O   ASN C 207      28.142 -41.393 -25.797  1.00 89.36           O  
ATOM   4815  CG  ASN C 207      29.403 -44.348 -25.552  1.00 89.36           C  
ATOM   4816  ND2 ASN C 207      29.562 -44.918 -26.740  1.00 89.36           N  
ATOM   4817  OD1 ASN C 207      30.353 -44.075 -24.813  1.00 89.36           O  
ATOM   4818  N   PRO C 208      28.590 -40.655 -23.755  1.00 92.88           N  
ATOM   4819  CA  PRO C 208      28.751 -39.282 -24.238  1.00 92.88           C  
ATOM   4820  C   PRO C 208      29.958 -39.118 -25.159  1.00 92.88           C  
ATOM   4821  CB  PRO C 208      28.934 -38.474 -22.950  1.00 92.88           C  
ATOM   4822  O   PRO C 208      31.037 -39.638 -24.867  1.00 92.88           O  
ATOM   4823  CG  PRO C 208      29.445 -39.460 -21.950  1.00 92.88           C  
ATOM   4824  CD  PRO C 208      28.935 -40.824 -22.321  1.00 92.88           C  
ATOM   4825  N   GLN C 209      29.780 -38.437 -26.322  1.00 92.21           N  
ATOM   4826  CA  GLN C 209      30.851 -38.173 -27.277  1.00 92.21           C  
ATOM   4827  C   GLN C 209      31.332 -36.729 -27.179  1.00 92.21           C  
ATOM   4828  CB  GLN C 209      30.386 -38.476 -28.702  1.00 92.21           C  
ATOM   4829  O   GLN C 209      32.488 -36.431 -27.489  1.00 92.21           O  
ATOM   4830  CG  GLN C 209      30.093 -39.949 -28.954  1.00 92.21           C  
ATOM   4831  CD  GLN C 209      31.303 -40.711 -29.460  1.00 92.21           C  
ATOM   4832  NE2 GLN C 209      31.212 -42.036 -29.460  1.00 92.21           N  
ATOM   4833  OE1 GLN C 209      32.311 -40.113 -29.850  1.00 92.21           O  
ATOM   4834  N   LEU C 210      30.402 -35.822 -26.703  1.00 94.61           N  
ATOM   4835  CA  LEU C 210      30.726 -34.400 -26.641  1.00 94.61           C  
ATOM   4836  C   LEU C 210      31.339 -34.041 -25.292  1.00 94.61           C  
ATOM   4837  CB  LEU C 210      29.473 -33.555 -26.887  1.00 94.61           C  
ATOM   4838  O   LEU C 210      32.426 -33.462 -25.234  1.00 94.61           O  
ATOM   4839  CG  LEU C 210      28.777 -33.750 -28.235  1.00 94.61           C  
ATOM   4840  CD1 LEU C 210      27.510 -32.904 -28.304  1.00 94.61           C  
ATOM   4841  CD2 LEU C 210      29.722 -33.401 -29.380  1.00 94.61           C  
ATOM   4842  N   ILE C 211      30.691 -34.340 -24.277  1.00 96.68           N  
ATOM   4843  CA  ILE C 211      31.197 -34.134 -22.925  1.00 96.68           C  
ATOM   4844  C   ILE C 211      31.625 -35.471 -22.324  1.00 96.68           C  
ATOM   4845  CB  ILE C 211      30.142 -33.455 -22.023  1.00 96.68           C  
ATOM   4846  O   ILE C 211      30.787 -36.243 -21.852  1.00 96.68           O  
ATOM   4847  CG1 ILE C 211      29.663 -32.144 -22.657  1.00 96.68           C  
ATOM   4848  CG2 ILE C 211      30.707 -33.211 -20.621  1.00 96.68           C  
ATOM   4849  CD1 ILE C 211      28.536 -31.463 -21.893  1.00 96.68           C  
ATOM   4850  N   LYS C 212      32.947 -35.727 -22.185  1.00 94.76           N  
ATOM   4851  CA  LYS C 212      33.469 -37.000 -21.696  1.00 94.76           C  
ATOM   4852  C   LYS C 212      33.891 -36.896 -20.233  1.00 94.76           C  
ATOM   4853  CB  LYS C 212      34.650 -37.460 -22.551  1.00 94.76           C  
ATOM   4854  O   LYS C 212      34.394 -35.858 -19.799  1.00 94.76           O  
ATOM   4855  CG  LYS C 212      34.257 -37.956 -23.934  1.00 94.76           C  
ATOM   4856  CD  LYS C 212      35.427 -38.630 -24.640  1.00 94.76           C  
ATOM   4857  CE  LYS C 212      35.000 -39.254 -25.962  1.00 94.76           C  
ATOM   4858  NZ  LYS C 212      36.152 -39.884 -26.674  1.00 94.76           N  
ATOM   4859  N   THR C 213      33.560 -37.955 -19.594  1.00 94.66           N  
ATOM   4860  CA  THR C 213      34.044 -38.046 -18.221  1.00 94.66           C  
ATOM   4861  C   THR C 213      35.494 -38.519 -18.188  1.00 94.66           C  
ATOM   4862  CB  THR C 213      33.171 -38.999 -17.383  1.00 94.66           C  
ATOM   4863  O   THR C 213      35.840 -39.521 -18.818  1.00 94.66           O  
ATOM   4864  CG2 THR C 213      33.594 -38.985 -15.917  1.00 94.66           C  
ATOM   4865  OG1 THR C 213      31.801 -38.590 -17.477  1.00 94.66           O  
ATOM   4866  N   VAL C 214      36.406 -37.734 -17.537  1.00 92.63           N  
ATOM   4867  CA  VAL C 214      37.776 -38.148 -17.254  1.00 92.63           C  
ATOM   4868  C   VAL C 214      37.878 -38.648 -15.815  1.00 92.63           C  
ATOM   4869  CB  VAL C 214      38.777 -36.996 -17.491  1.00 92.63           C  
ATOM   4870  O   VAL C 214      37.767 -37.863 -14.870  1.00 92.63           O  
ATOM   4871  CG1 VAL C 214      40.212 -37.473 -17.269  1.00 92.63           C  
ATOM   4872  CG2 VAL C 214      38.612 -36.427 -18.899  1.00 92.63           C  
ATOM   4873  N   ARG C 215      37.960 -39.900 -15.676  1.00 87.49           N  
ATOM   4874  CA  ARG C 215      37.917 -40.548 -14.370  1.00 87.49           C  
ATOM   4875  C   ARG C 215      38.912 -39.908 -13.408  1.00 87.49           C  
ATOM   4876  CB  ARG C 215      38.206 -42.045 -14.503  1.00 87.49           C  
ATOM   4877  O   ARG C 215      40.095 -39.775 -13.728  1.00 87.49           O  
ATOM   4878  CG  ARG C 215      37.777 -42.865 -13.296  1.00 87.49           C  
ATOM   4879  CD  ARG C 215      37.946 -44.358 -13.539  1.00 87.49           C  
ATOM   4880  NE  ARG C 215      37.599 -45.139 -12.356  1.00 87.49           N  
ATOM   4881  NH1 ARG C 215      37.926 -47.193 -13.362  1.00 87.49           N  
ATOM   4882  NH2 ARG C 215      37.265 -47.078 -11.170  1.00 87.49           N  
ATOM   4883  CZ  ARG C 215      37.598 -46.468 -12.299  1.00 87.49           C  
ATOM   4884  N   GLY C 216      38.411 -39.421 -12.233  1.00 85.84           N  
ATOM   4885  CA  GLY C 216      39.164 -38.884 -11.110  1.00 85.84           C  
ATOM   4886  C   GLY C 216      39.550 -37.429 -11.292  1.00 85.84           C  
ATOM   4887  O   GLY C 216      40.175 -36.832 -10.412  1.00 85.84           O  
ATOM   4888  N   VAL C 217      39.188 -36.844 -12.380  1.00 90.27           N  
ATOM   4889  CA  VAL C 217      39.691 -35.499 -12.637  1.00 90.27           C  
ATOM   4890  C   VAL C 217      38.525 -34.556 -12.923  1.00 90.27           C  
ATOM   4891  CB  VAL C 217      40.692 -35.482 -13.814  1.00 90.27           C  
ATOM   4892  O   VAL C 217      38.351 -33.547 -12.236  1.00 90.27           O  
ATOM   4893  CG1 VAL C 217      41.253 -34.077 -14.026  1.00 90.27           C  
ATOM   4894  CG2 VAL C 217      41.822 -36.480 -13.568  1.00 90.27           C  
ATOM   4895  N   GLY C 218      37.596 -34.883 -13.812  1.00 93.97           N  
ATOM   4896  CA  GLY C 218      36.482 -34.015 -14.162  1.00 93.97           C  
ATOM   4897  C   GLY C 218      35.865 -34.350 -15.507  1.00 93.97           C  
ATOM   4898  O   GLY C 218      35.643 -35.522 -15.819  1.00 93.97           O  
ATOM   4899  N   TYR C 219      35.537 -33.234 -16.315  1.00 97.31           N  
ATOM   4900  CA  TYR C 219      34.867 -33.405 -17.600  1.00 97.31           C  
ATOM   4901  C   TYR C 219      35.608 -32.662 -18.704  1.00 97.31           C  
ATOM   4902  CB  TYR C 219      33.419 -32.913 -17.520  1.00 97.31           C  
ATOM   4903  O   TYR C 219      36.266 -31.650 -18.448  1.00 97.31           O  
ATOM   4904  CG  TYR C 219      32.588 -33.634 -16.487  1.00 97.31           C  
ATOM   4905  CD1 TYR C 219      31.914 -34.811 -16.804  1.00 97.31           C  
ATOM   4906  CD2 TYR C 219      32.475 -33.139 -15.192  1.00 97.31           C  
ATOM   4907  CE1 TYR C 219      31.146 -35.478 -15.855  1.00 97.31           C  
ATOM   4908  CE2 TYR C 219      31.709 -33.798 -14.235  1.00 97.31           C  
ATOM   4909  OH  TYR C 219      30.291 -35.621 -13.632  1.00 97.31           O  
ATOM   4910  CZ  TYR C 219      31.050 -34.965 -14.575  1.00 97.31           C  
ATOM   4911  N   MET C 220      35.474 -33.263 -19.905  1.00 96.67           N  
ATOM   4912  CA  MET C 220      36.129 -32.647 -21.055  1.00 96.67           C  
ATOM   4913  C   MET C 220      35.164 -32.523 -22.229  1.00 96.67           C  
ATOM   4914  CB  MET C 220      37.358 -33.456 -21.472  1.00 96.67           C  
ATOM   4915  O   MET C 220      34.455 -33.475 -22.558  1.00 96.67           O  
ATOM   4916  CG  MET C 220      38.121 -32.853 -22.640  1.00 96.67           C  
ATOM   4917  SD  MET C 220      39.631 -33.807 -23.061  1.00 96.67           S  
ATOM   4918  CE  MET C 220      38.887 -35.395 -23.526  1.00 96.67           C  
ATOM   4919  N   PHE C 221      35.205 -31.347 -22.817  1.00 97.34           N  
ATOM   4920  CA  PHE C 221      34.480 -31.090 -24.056  1.00 97.34           C  
ATOM   4921  C   PHE C 221      35.350 -31.404 -25.267  1.00 97.34           C  
ATOM   4922  CB  PHE C 221      34.009 -29.633 -24.112  1.00 97.34           C  
ATOM   4923  O   PHE C 221      36.356 -30.734 -25.506  1.00 97.34           O  
ATOM   4924  CG  PHE C 221      32.992 -29.365 -25.189  1.00 97.34           C  
ATOM   4925  CD1 PHE C 221      33.322 -28.601 -26.302  1.00 97.34           C  
ATOM   4926  CD2 PHE C 221      31.705 -29.877 -25.087  1.00 97.34           C  
ATOM   4927  CE1 PHE C 221      32.383 -28.352 -27.300  1.00 97.34           C  
ATOM   4928  CE2 PHE C 221      30.761 -29.632 -26.081  1.00 97.34           C  
ATOM   4929  CZ  PHE C 221      31.102 -28.868 -27.185  1.00 97.34           C  
ATOM   4930  N   THR C 222      34.952 -32.401 -26.106  1.00 93.93           N  
ATOM   4931  CA  THR C 222      35.876 -33.028 -27.045  1.00 93.93           C  
ATOM   4932  C   THR C 222      35.802 -32.352 -28.410  1.00 93.93           C  
ATOM   4933  CB  THR C 222      35.582 -34.532 -27.197  1.00 93.93           C  
ATOM   4934  O   THR C 222      36.806 -32.263 -29.120  1.00 93.93           O  
ATOM   4935  CG2 THR C 222      35.913 -35.290 -25.916  1.00 93.93           C  
ATOM   4936  OG1 THR C 222      34.194 -34.714 -27.501  1.00 93.93           O  
ATOM   4937  N   PRO C 223      34.678 -31.740 -28.749  1.00 92.65           N  
ATOM   4938  CA  PRO C 223      34.613 -31.176 -30.099  1.00 92.65           C
[truncated: 3,279 more chars]
