# Supplementary material for: Ancestral reconstruction of duplicated signaling proteins reveals the evolution of signaling specificity
Source: eLife journal article supplement (doi:10.7554/elife.77346), 2022-06-10
Supplement: supp [file elife-77346-supp-v1.zip › elife_poa_e77346_Figure_6_source_data_1.xlsx]

## Sheet: Sheet1
HK	RR	0	10sec	30sec	5min	30min
ancHK1	RR1	1	0.9265	0.9665	0.7429	0.3933
ancHK1	RR1	1	0.9499	0.9195	0.7512	0.3176
HK1	RR1	1	0.5209	0.3203	0.0391	0.0191
HK1	RR1	1	0.5719	0.4563	0.0357	0.0142
ancHK1 + F	RR1	1	0.725	0.4301	0.0294	0.0084
ancHK1 + F	RR1	1	0.6894	0.4298	0.0449	0.0163
ancHK1	RR2	1	0.9283	0.6652	0.1227	0.0155
ancHK1	RR2	1	0.7077	0.4269	0.073	0.0152
HK1	RR2	1	0.6912	0.7308	0.433	0.0462
HK1	RR2	1	0.8972	0.7357	0.4221	0.0693
ancHK1 + F	RR2	1	0.8536	0.7257	0.3126	0.0459
ancHK1 + F	RR2	1	0.7322	0.5748	0.2072	0.0668
