# Supplementary material for: Ancestral reconstruction of duplicated signaling proteins reveals the evolution of signaling specificity
Source: eLife journal article supplement (doi:10.7554/elife.77346), 2022-06-10
Supplement: supp [file elife-77346-supp-v1.zip › elife_poa_e77346_Source_data_2.pdf]

# All gels 0 - 30 min (replicate 1)

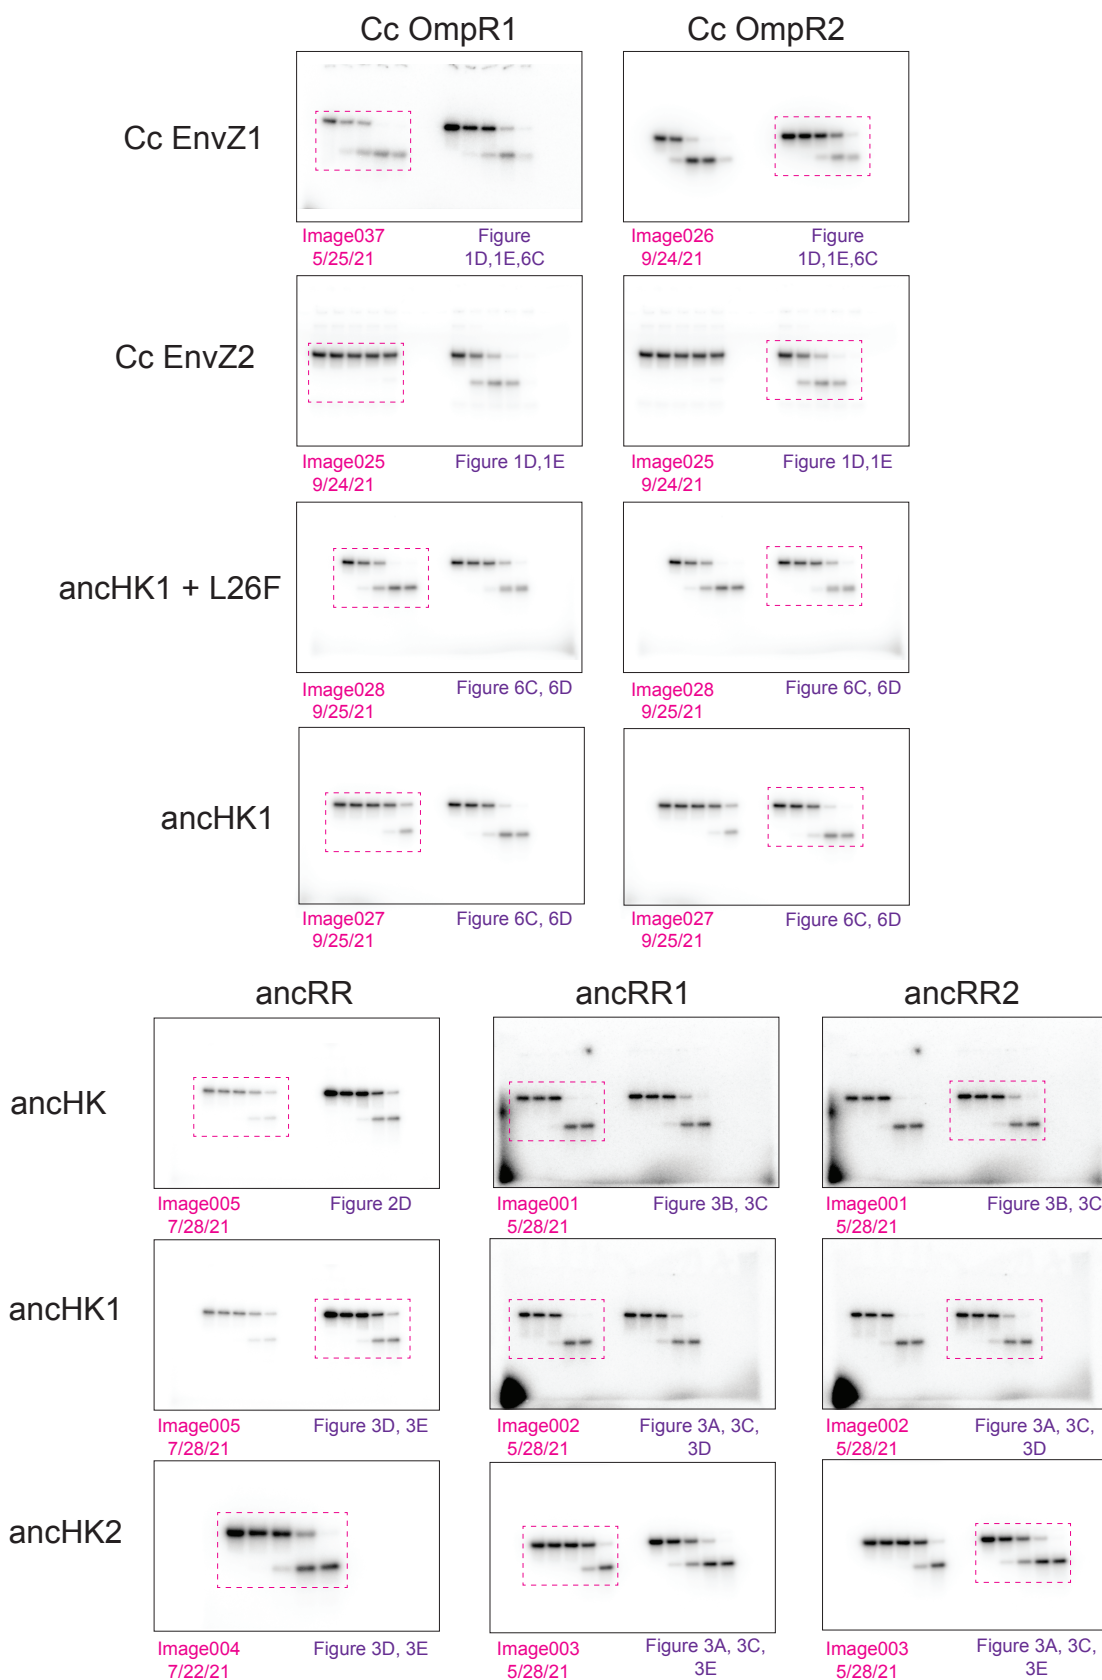

# All gels 0 - 5 min (replicate 1)

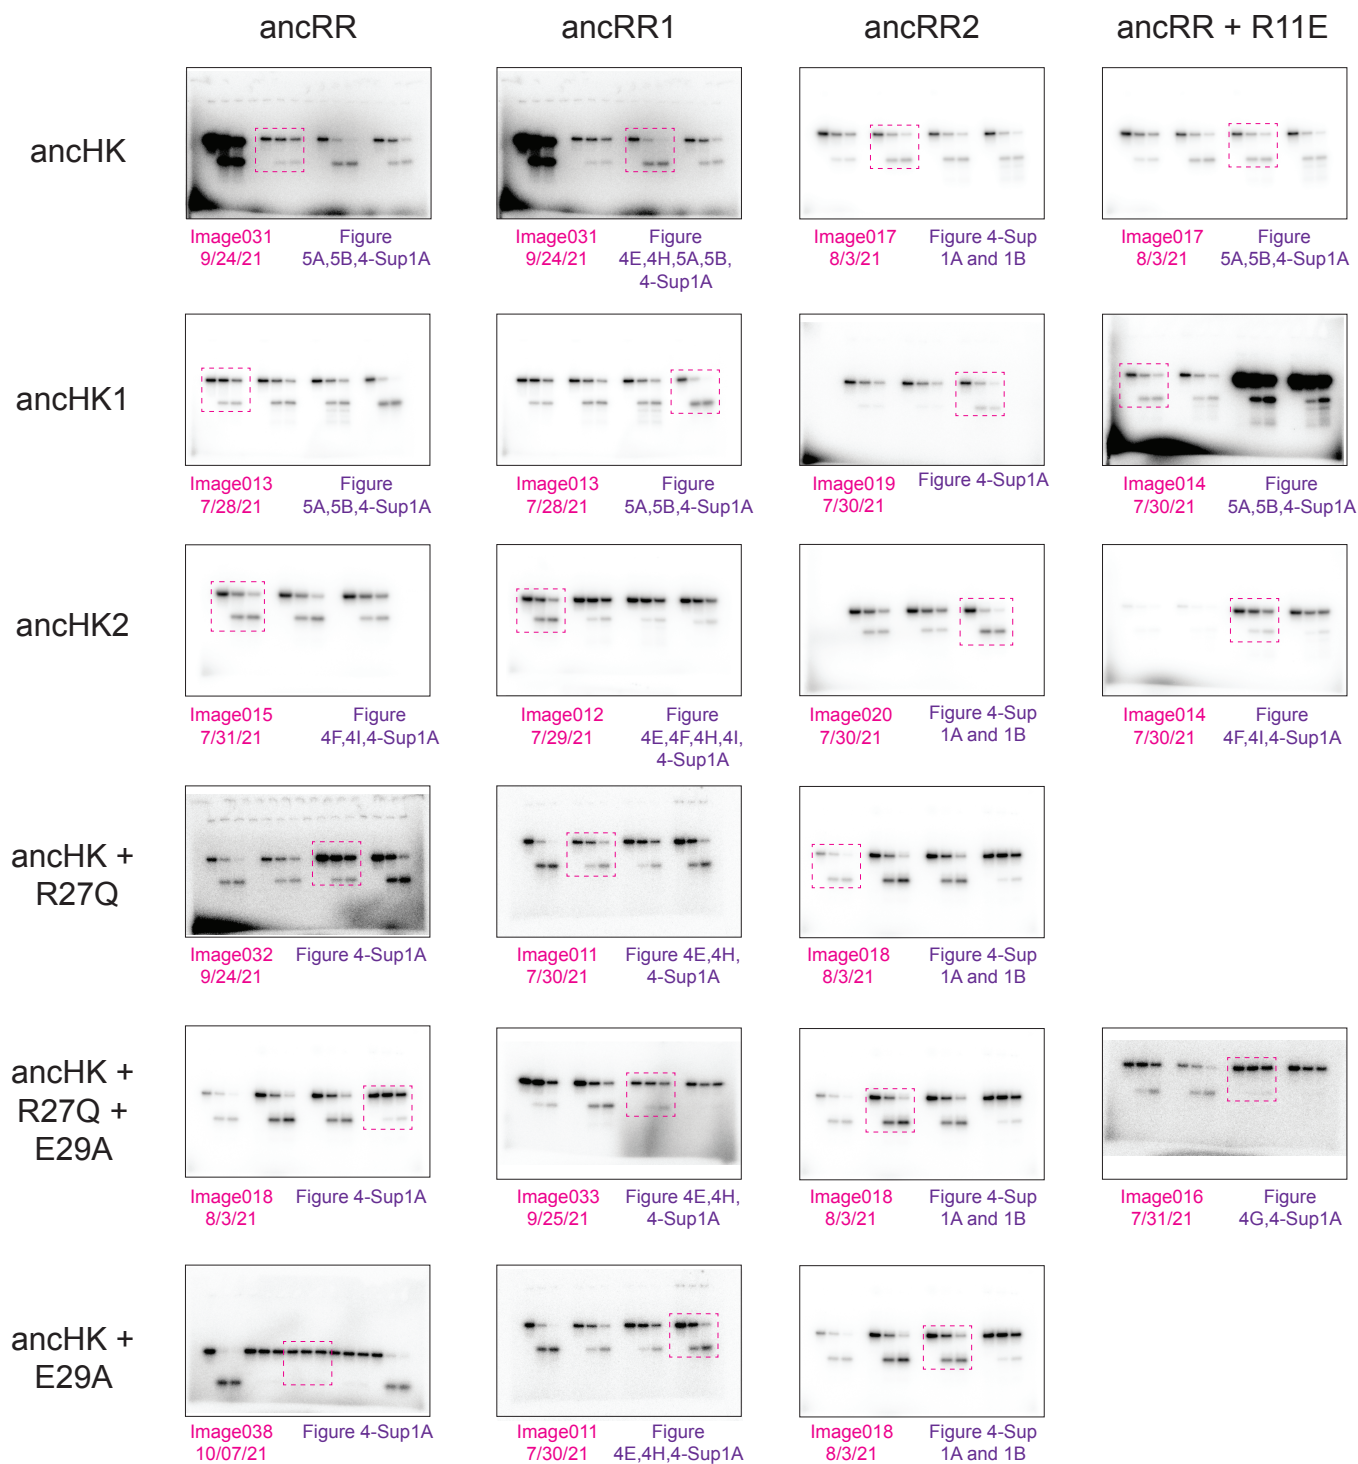

# All gels 0 - 30 min (replicate 2)

Cc OmpR1

Cc OmpR2

Cc EnvZ1

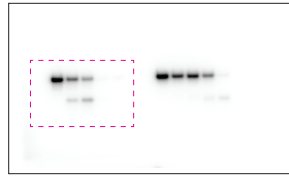

Figure 1E,6D

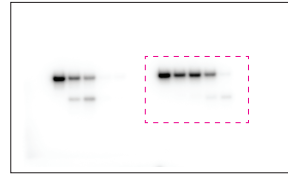

Figure 1E,6D

Cc EnvZ2

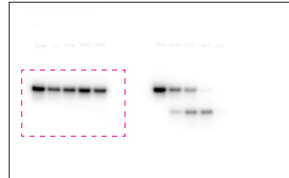

Figure 1E

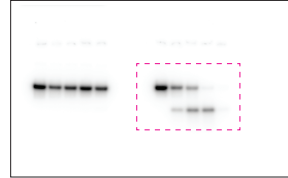

Figure 1E

ancHK1 + L26F

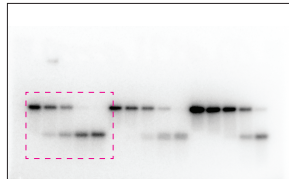

Figure 6D

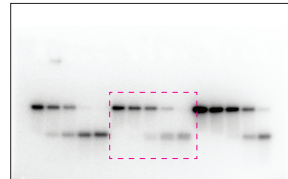

Figure 6D

ancHK1

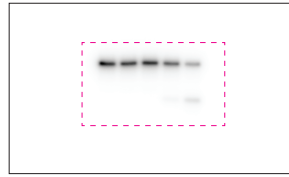

Figure 6D

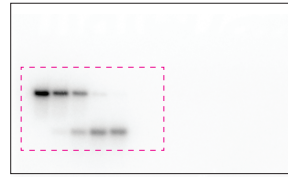

Figure 6D

ancRR

ancRR1

ancRR2

ancHK

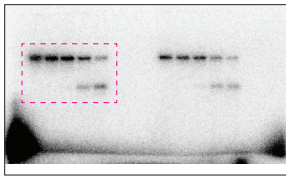

Image006  
7/24/21

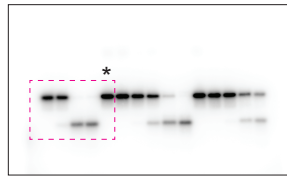

Image009 (\*0 timepoint)  
7/23/21

Figure 3C

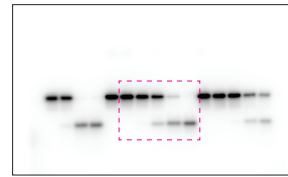

Image009  
7/23/21

Figure 3C

ancHK1

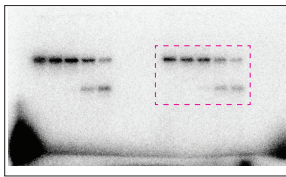

Image006  
7/24/21

Figure 3E

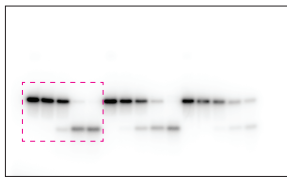

Image008  
7/23/21

Figure 3C

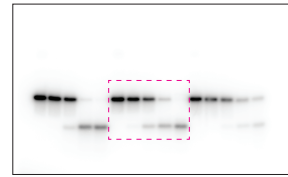

Image008  
7/23/21

Figure 3C

ancHK2

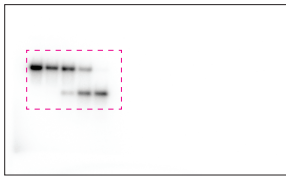

Image007  
7/24/21

Figure 3E

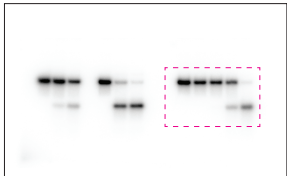

Image022  
9/22/21

Figure 3C, 3E

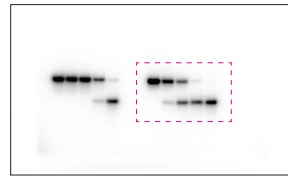

Image010  
7/23/21

Figure 3C, 3E

# All gels 0 - 5 min (replicate 2)

ancRR

ancRR1

ancRR2

ancRR + e1

ancHK

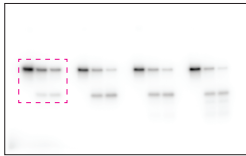

Image017  
8/3/21

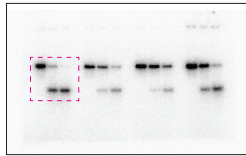

Image011  
7/30/21

Figure 5B

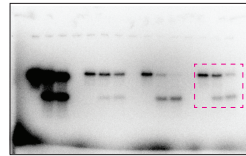

Image031  
9/24/21

Figure 4-Sup  
1A and 1B

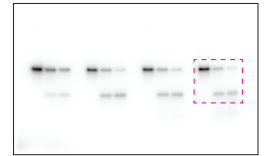

Image017  
8/3/21

Figure 5B

ancHK1

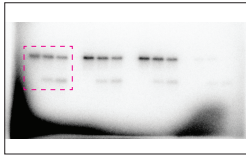

Image021  
7/31/21

Figure 5B

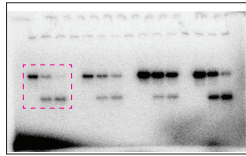

Image032  
9/24/21

Figure 5B

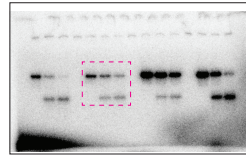

Image032  
9/24/21

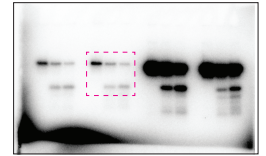

Image014  
7/30/21

Figure 5B

ancHK2

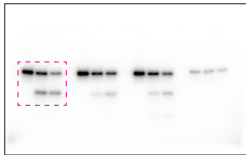

Image034  
9/25/21

Figure 4I

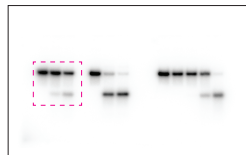

Image022  
9/22/21

Figure 4H,4I

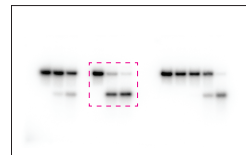

Image022  
9/22/21

Figure 4-Sup  
1A and 1B

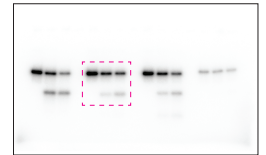

Image034  
9/25/21

Figure 4I

ancHK +  
R27Q

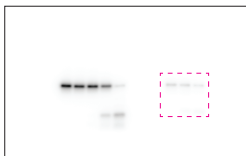

Image044  
10/14/21

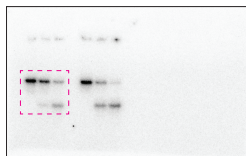

Image023  
9/22/21

Figure 4H

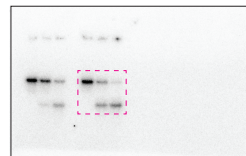

Image023  
9/22/21

Figure 4-Sup  
1A and 1B

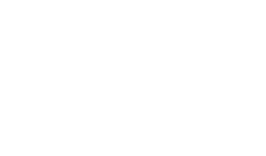

Image034  
9/25/21

Figure 4I

ancHK +  
R27Q +  
E29A

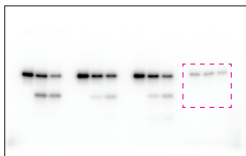

Image034  
9/25/21

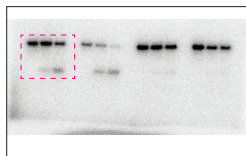

Image016  
7/31/21

Figure 4H

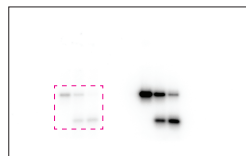

Image045  
10/14/21

Figure 4-Sup  
1A and 1B

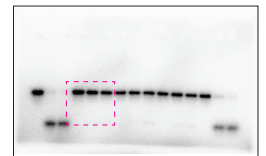

Image038  
10/07/21

Figure 4G

ancHK +  
E29A

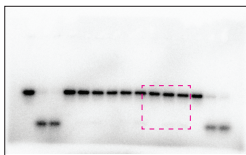

Image038  
10/07/21

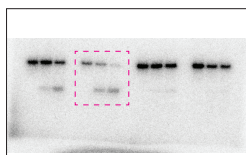

Image016  
7/31/21

Figure 4H

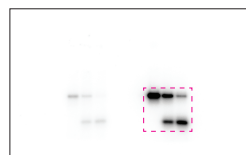

Image045  
10/14/21

Figure 4-Sup  
1A and 1B

# Competitions

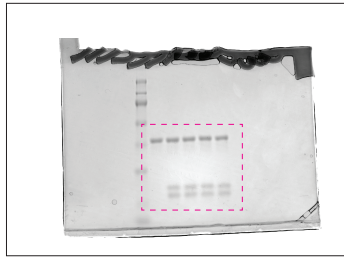

Image047  
9/24/21

Figure 1-Sup1B

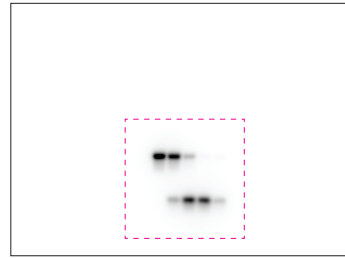

Image046  
9/24/21

Figure 1-Sup1B

## alt-alls

ancRR

ancRR1

ancRR2

ancHK

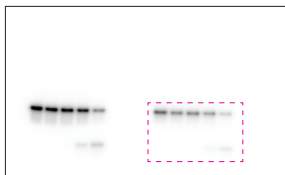

Image040  
10/08/21

Figure 3 - Sup  
2D and 2E

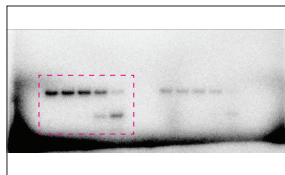

Image041  
10/13/21

Figure 3 - Sup  
2D and 2E

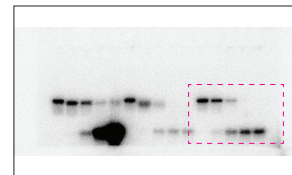

Image043  
10/06/21

Figure 3 - Sup  
2D and 2E

ancHK1

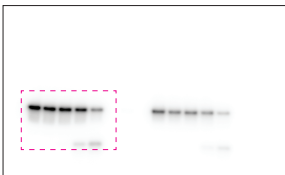

Image040  
10/08/21

Figure 3 - Sup  
2D and 2E

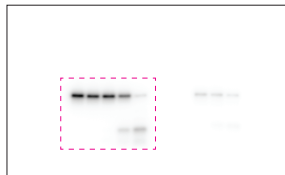

Image044  
10/14/21

Figure 3 - Sup  
2D and 2E

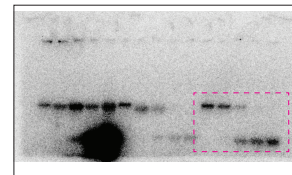

Image042  
10/07/21

Figure 3 - Sup  
2D and 2E

ancHK2

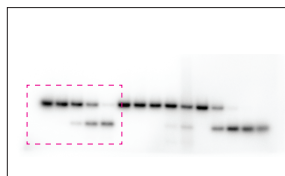

Image039  
10/13/21

Figure 3 - Sup  
2D and 2E

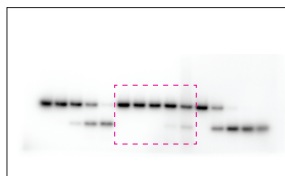

Image039  
10/13/21

Figure 3 - Sup  
2D and 2E

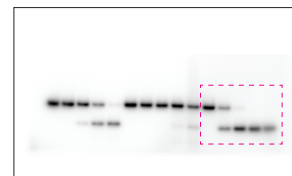

Image039  
10/13/21

Figure 3 - Sup  
2D and 2E

# HK-only controls

Cc HK1

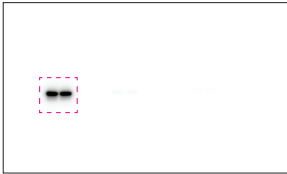

Image048  
04/29/22

Figure 1-Sup2

Cc HK2

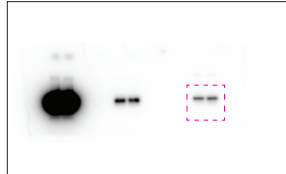

Image048  
04/29/22

Figure 1-Sup2

anchHK

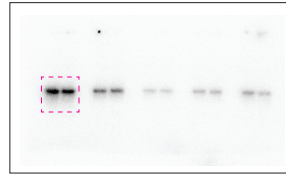

Image049  
04/30/22

Figure 1-Sup2

anchHK1

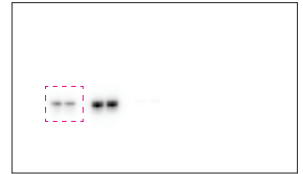

Image050  
4/30/22

Figure 1-Sup2

anchHK2

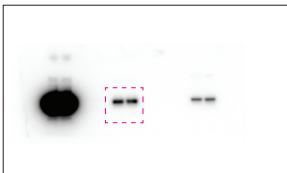

Image048  
04/29/22

Figure 1-Sup2

anchHK + R27Q

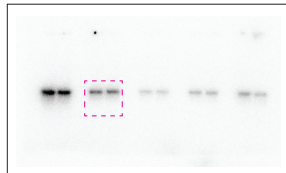

Image049  
04/30/22

Figure 1-Sup2

anchHK + R27Q  
+ E29A

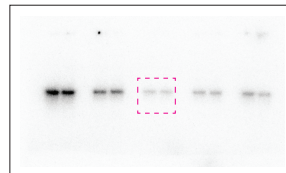

Image049  
04/30/22

Figure 1-Sup2

anchHK + E29A

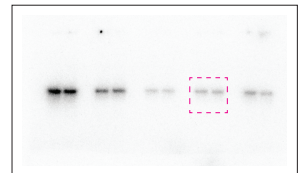

Image049  
04/30/22

Figure 1-Sup2

anchHK1 + F

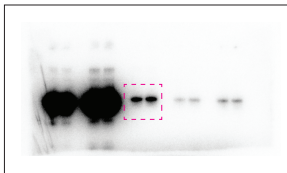

Image050  
4/30/22

Figure 1-Sup2

anchHK-alt

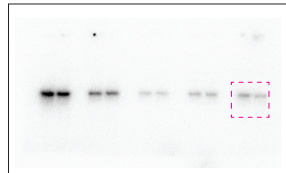

Image049  
4/30/22

Figure 1-Sup2

anchHK1-alt

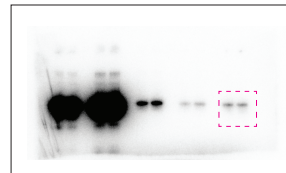

Image050  
4/30/22

Figure 1-Sup2

anchHK2-alt

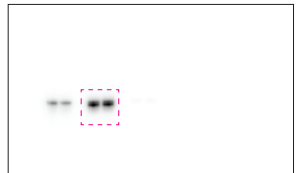

Image050  
4/30/22

Figure 1-Sup2
