# Supplementary material for: Ancestral reconstruction of duplicated signaling proteins reveals the evolution of signaling specificity
Source: eLife journal article supplement (doi:10.7554/elife.77346), 2022-06-10
Supplement: supp [file elife-77346-supp-v1.zip › elife_poa_e77346_Supplementary_file_1.xlsx]

## Sheet: Strains
Strain Number	Plasmid	Description
ML3639	pIN213	Cc EnvZ1
ML3640	pIN216	CC EnvZ2
ML3641	pIN217	Cc OmpR1
ML3642	pIN218	Cc OmpR2
ML3643	pIN264	ancHK
ML3644	pIN265	ancHK1
ML3645	pIN266	ancHK2
ML3646	pIN277	ancRR
ML3647	pIN278	ancRR1
ML3648	pIN279	ancRR2
ML3649	pIN270	ancHK + R27Q
ML3650	pIN272	ancHK + E29A
ML3651	pIN271	ancHK + R27Q + E29A
ML3652	pIN281	ancRR + R11E
ML3653	pIN290	ancHK1 + F
ML3654	pIN296	ancHK-alt
ML3655	pIN297	ancHK1-alt
ML3656	pIN298	ancHK2-alt
ML3657	pIN299	ancRR-alt
ML3658	pIN300	ancRR1-alt
ML3659	pIN301	ancRR2-alt

## Sheet: Primers
Primer	Description	Sequence
IN440F	Forward primer Cc EnvZ1	TTTGTACAAAAAAGCAGGCTCCGCGGCCGCCCCCTTCACCATGCAGGAGCGTCTGCGCC
IN441R	Reverse primer Cc EnvZ1	ccactttgtacaagaaagctgggtcggcgcgcccacccttTCAGGCCGGCAGCTTG
IN446F	Forward primer Cc EnvZ2	TTTGTACAAAAAAGCAGGCTCCGCGGCCGCCCCCTTCACCCGCCATATCGAGCAGCGCACCGCC
IN447R	Reverse primer Cc EnvZ2	ccactttgtacaagaaagctgggtcggcgcgcccacccttTTACCCCGGCAGCCTGAT
IN448F	Forward primer Cc OmpR1	TTTGTACAAAAAAGCAGGCTCCGCGGCCGCCCCCTTCACCGAAAACGTCCAAAACGCCGC
IN449R	Reverse primer Cc OmpR1	CCACTTTGTACAAGAAAGCTGGGTCGGCGCGCCCACCCTTTCATGGGGTGCGCACG
IN450F	Forward primer Cc OmpR2	TTTGTACAAAAAAGCAGGCTCCGCGGCCGCCCCCTTCACCACCCCTGACGAGCGC
IN451R	Reverse primer Cc OmpR2	CCACTTTGTACAAGAAAGCTGGGTCGGCGCGCCCACCCTTTCAATCCGGCGCCAGC
IN561F	Forward primer ancHK	TTTGTACAAAAAAGCAGGCTCCGCGGCCGCCCCCTTCACCCGCCAGGTTGAGGAGCGTACTC
IN562R	Reverse primer ancHK	ctttgtacaagaaagctgggtcggcgcgcccacccttTCATGGAAGAGTGATACGCACGCGCAGACC
IN567F	Forward primer ancRR	TTTGTACAAAAAAGCAGGCTCCGCGGCCGCCCCCTTCACCCCACGCATCCTTGTGGTCG
IN568R	Reverse primer ancRR	CTTTGTACAAGAAAGCTGGGTCGGCGCGCCCACCCTTTCAGCGCTCAGCATCCGGG
IN563F	Forward primer ancHK1	TTTGTACAAAAAAGCAGGCTCCGCGGCCGCCCCCTTCACCCGTCAGGTTGAAGATCGCACG
IN564R	Reverse primer ancHK1	ctttgtacaagaaagctgggtcggcgcgcccacccttTCAAGGTAAAGTGATACGCGCGCGCAAG
IN565F	Forward primer ancHK2	TTTGTACAAAAAAGCAGGCTCCGCGGCCGCCCCCTTCACCCGCCAAATTGAAGAGCGTACTG
IN566R	Reverse primer ancHK2	ctttgtacaagaaagctgggtcggcgcgcccacccttTCATGGAAGACGAATAGTTACGCGCAACCCACCG
IN569F	Forward primer ancRR1	TTTGTACAAAAAAGCAGGCTCCGCGGCCGCCCCCTTCACCCCCCGCATCCTGGTGGTAGATGATGATCC
IN570R	Reverse primer ancRR1	CTTTGTACAAGAAAGCTGGGTCGGCGCGCCCACCCTTTCAACGCTCCACATCTGGCG
IN571F	Forward primer ancRR2	TTTGTACAAAAAAGCAGGCTCCGCGGCCGCCCCCTTCACCCCGCACATCTTAGTAGTAGACGAT
IN572R	Reverse primer ancRR2	CTTTGTACAAGAAAGCTGGGTCGGCGCGCCCACCCTTTCAACGCTCGGGATCAGGG
IN601F	Forward primer ancHK point mutants	TTTGTACAAAAAAGCAGGCTCCGCGGCCGCCCCCTTCACCCGCCAGGTTgaaGAGCGTACTC
IN602R	Reverse primer ancHK point mutants	ctttgtacaagaaagctgggtcggcgcgcccacccttTCATGGAAGAGTGATACGtacGCGCAGtcc
IN603F	Forward primer ancHK-alt	TTTGTACAAAAAAGCAGGCTCCGCGGCCGCCCCCTTCACCCGCCAAGTCGAAGACCGTACC
IN604R	Reverse primer ancHK-alt	ctttgtacaagaaagctgggtcggcgcgcccacccttTCATGGAAGAGTAATTGTTGCACGTAAGC
IN605F	Forward primer ancHK1-alt	TTTGTACAAAAAAGCAGGCTCCGCGGCCGCCCCCTTCACCCGTCACGTCGAAGAACGCAC
IN606R	Reverse primer ancHK1-alt	ctttgtacaagaaagctgggtcggcgcgcccacccttTCAGGGAAGCGTAACTGTAGCGC
IN607F	Forward primer ancHK2-alt	TTTGTACAAAAAAGCAGGCTCCGCGGCCGCCCCCTTCACCCGTCATGTCGAGCAACGCAC
IN608R	Reverse primer ancHK2-alt	ctttgtacaagaaagctgggtcggcgcgcccacccttTCACGGAAGTTTAATGCGGACACGCAAT
IN609F	Forward primer ancRR-alt	TTTGTACAAAAAAGCAGGCTCCGCGGCCGCCCCCTTCACCCCTCATATCCTGGTCGTCGATGA
IN610R	Reverse primer ancRR-alt	CTTTGTACAAGAAAGCTGGGTCGGCGCGCCCACCCTTTCAGCGCTCAACATCCGGGG
IN611F	Forward primer ancRR1-alt	TTTGTACAAAAAAGCAGGCTCCGCGGCCGCCCCCTTCACCCCGCATATTTTAGTGGTGGACGATG
IN612R	Reverse primer ancRR1-alt	CTTTGTACAAGAAAGCTGGGTCGGCGCGCCCACCCTTTCAACGCTCTACATCTGGGGCG
IN613F	Forward primer ancRR2-alt	TTTGTACAAAAAAGCAGGCTCCGCGGCCGCCCCCTTCACCCCTCATATTCTGGTCGTGGACGA
IN614R	Reverse primer ancRR2-alt	CTTTGTACAAGAAAGCTGGGTCGGCGCGCCCACCCTTTCAACGTTCCGCATCGGGGCG

## Sheet: All protein sequences
Sequence Name	Plasmid	Sequence
Cc 1181 (Cc EnvZ1)	pIN213	ATGCAGGAGCGTCTGCGCCGCTATGTCGAGGACCGTACGGCCATGGTCGGCGCGATCGCTCACGACCTGCGCACGCCGCTGACGCGCCTGAAGTTCCGGATTGAGGCGGCGCCCGAAGATATCCGGCCCAAGCTCGCGGCCGATATCGACCAGATGGAGGCGATGATCTCCGCCACCCTGGGCTTCGTACGCGACACCAATCGCCCCGCCGAACGCACGAAGCTGGAGCTGTCCTCGCTGCTGGAAAGCGTGATGGACGAAGCCGCCGAGACGGGCGGCGACGCGACCGTCGAGCGGTCCGAAAAGACCGTGATCGAAGGCGATCCCGTCGCCCTCAAGCGTCTGGTCTCCAACCTCGTCGAGAACGCCTTGAAGTACGGCGGCCGCGCGCGCGGCAGG…
CC 2932 (Cc EnvZ2)	pIN216	CGCCATATCGAGCAGCGCACCGCCCTCCTGGCCAGCGTCAGCCATGACCTGCGCACGCCGCTGACCCGGCTGAAGCTGGAAATGGCCATGGCCGAGCCCTGCGAGCGCATGGAGGCCATGAAGGGCGATCTGGCCGAAATGGAGCACATGATCGACGAGTACCTGGCCTTCGCCCGCGGCGAGGGCGGCGAGGCGATCCAGGTCGTGGACCTGTCGGACCTGGTCGAAAGCGTGGTGGCCGACGCCGAGCGCGGCGGGGCGGCGATCGAGACCGAGATCACGCAAGGGCTGGAAACCCGCCTGCGCCCCCTCACCTTCCGCCGGGCCCTGGCCAATCTGATCGACAACGGCGTGGCCCACGCCGACCGGGTGCGCGTCACGGTCAGCCCGCGTCAGACC…
Cc 1182 (Cc OmpR1)	pIN217	GAAAACGTCCAAAACGCCGCCCAAAGCGAGCTCGAGGCCGTCCGCGGGGCGCCTTCGCGGATCCTGATCGTCGATGACGATCCGGGCATACGCGACGTGGTGTCCGACTTTCTCGCCAAGCACGGCTATGTGGTCGAGACCGCCCAGGATGGCCGCACGATGGAGCAGGTTCTGGCGCGGGGGCCGATCGATCTGATCGTGCTCGACGTCATGCTGCCCGGCGAAGACGGCCTGGCCATCTGCCGGCGGCTGTCCGCGACACCCGAAGCTCCCGCCATCATCATGCTGTCGGCGATGGGCGAGGAAACCGACCGCATCGTCGGCCTGGAGCTGGGCGCCGACGACTATCTGCCCAAGCCCTGCAATCCGCGCGAGCTCTTGGCTCGTGTCCGCGCCGTG…
Cc 2931 (Cc OmpR2)	pIN218	ACCCCTGACGAGCGCCGCGAACGCCATCTGCTGGTGGTCGACGACGACGACCGGCTGCGCAAGCTGATCAAGGAATTCCTGAGCCGCGCGGGCTTTCGCGTCACCGCCGCCTCAAGCGCCGCGGCGGCCGACAAGCTGTTCGATGCCCTGGACTTCGACCTGATGGTGCTGGACGTGATGATGCCGGGCGAGGACGGCATGGCCTTCACCAAGCGCCTGCGCGCCAAGGGCGGCGAGGCCGGCCGCACGCCGATCCTGATGCTGACCGCCCGCGACCAGACCGCCGATCGGATCGAGGGCCTGTCCAGCGGCGTCGACGACTATCTGGGCAAGCCGTTCGAGCCGCAGGAACTGCTTCTGCGCATCGAGGCCATCCTGCGCCGCTCGGCCGCGCGCCCC…
ancHK	pIN264	CGCCAGGTTGAGGAGCGTACTCGTATGCTGGCTGGTGTGAGTCACGACCTGCGTACGCCCCTTACACGCTTGCGCCTGCGTGTCGAAATGATGCCGGATGACGAGCGCCGTAAAATGGTGCGTGATATCGACGAAATGGAGGCCATGATTGATGCTTTCCTTGCGTTTGCGCGTGGGGAGGCCGCTGAACCACCCGAGCCGGTTGACTTGGCGGCTTTACTGGAAGAGGTAGTTGATGATTTCGCGGATATGGGCGCCGAGGTTACTTTGGATGCTCCTGAACCCGTAACCGTGCGTGCACGTCCGGTAGCTCTTCGCCGCGCCTTGAGTAACTTGATTGACAACGCGGTACGTTATGGAGGTCAAGTACGCGTTTCGTTGTCCCGCGATGGTGACCGC…
ancHK1	pIN265	CGTCAGGTTGAAGATCGCACGCGCATGTTGGCAGCCATTTCCCACGACTTGCGCACGCCTCTTACACGCCTTCGTCTTCGTGTCGAAATGATTCCCGACGATGAGCGCCGCAAAATGGTCCGTGATATCGATGAAATGGAGGCTATGATTGACGCTACATTAGCCTTCGCGCGCGGAGAAGCAGCAGAACCTACGGAGCCTGTTGATCTGGCCGCCCTGCTTGAATCCATTTGTGACGACCTTGCTGACATGGGGGCAGATGTCACTTTGGAAGCTCCCGAGCCGGTGACAGTTCGTGCACGCCCTGTCGCACTTCGCCGTGCTCTTAGTAATCTGATCGACAACGCAGTACGCTATGGAGGACGTGCTCGTGTATCATTACAACGTGATGGCGACCGC…
ancHK2	pIN266	CGCCAAATTGAAGAGCGTACTGCGATGTTAGCGGGCGTAAGCCACGATTTGCGTACACCCCTTACCCGCTTGCGTCTGCAATTAGCAATGATGCCACCTGATGAAGAGCGTGATATGAAACAGGATATTGACGAGATGGAGCGCATGATCGATGGGTTCCTTGCTTTTGCTCGTGGAGAGGGAGCGGAACCCGCAGAACCCGTTGATCTGGCAGCGTTGTTGGAAGAGGTGGTTGACGACGCGCGTCGTGCAGGTGCGGAGGTTAGTCTTGATGCGCCCGAGGATCTGACAGTGACCTTACGTCCACTGGCAATGCGCCGCGCGTTATCGAATTTAATCGACAATGCGGCCCGTTACGGATCCCACGTATGGGTGTCAGCGGCGCGCGATGGAAATTCA…
ancRR	pIN277	CCACGCATCCTTGTGGTCGACGACGATCCGCGTTTGCGTGATTTGTTAGCACGTTACCTTTCACAGAATGGTTTCCGTGTGACAACAGCAGCTGACGCCGCTGAGATGGATCGTCGCCTGGCACGTGCGCGTTTTGATTTGGTGGTACTTGACGTGATGATGCCAGGTGAGGACGGTTTGAGTCTGTGTCGTCGCCTGCGCtcacgtGGCTCAGACGTTCCGATCATCATGTTGACCGCACGCGGTGAGGATACAGATCGTATCGTCGGGCTGGAAATGGGAGCCGACGATTATCTGGCAAAGCCGTTTAACCCACGCGAGTTATTAGCACGCATTCGCGCTGTTCTTCGTCGTGCGCCACCCGCACCACCGGGCGCGCCACGTatgggtgaggcgCTT…
ancRR1	pIN278	CCCCGCATCCTGGTGGTAGATGATGATCCCGAAATCCGCGACTTACTTGCACGTTACCTGAGTCAGAACGGTTTCCGCGTTACAACTGCCGCTGATGCCGCAGAGATGGATCGTGCGCTGGCGGAAGCCCGTGTGGATCTGGTCGTCTTAGATGTTATGATGCCGGGAGAAGACGGTCTGTCATTATGTCGTCGTCTTCGTagtgcaTCTAGCGATGTTCCCATCATCATGTTAACAGCCATGGGAGAAGACACGGATCGCATTGTTGGGTTGGAGATGGGGGCGGATGACTACTTAGCAAAGCCTTTCAACCCACGTGAGCTGCTTGCCCGTATCCGTGCAGTTCTTCGTCGTGCGCCACCATCACCTCCCGGTAGCCCACGTatgggagaggcgCTT…
ancRR2	pIN279	CCGCACATCTTAGTAGTAGACGATGACCCGCGCTTGCGCGATCTTTTAGCCCGTTACTTATCGGAAAATGGGTTTCGTGTAACAGCCGCGGCTAGTGCGGCGGAGGCACGTGAGCGTTTAGCTGCGCTTGAGTTCGACCTGATGGTTCTGGATGTCATGATGCCTGGCGAAGATGGTTTAGATCTTACTCGCTCACTTCGTgaacgcGGCAGTGATGTTCCTATCTTAATGTTAACGGCTCGCGGCGAACCTGATGATCGTATTGCCGGGCTTGAGATGGGGGCAGACGATTATTTAGCCAAACCCTTTGAGCCACGTGAGCTTCTTGCACGTATTCGTGCGATTTTACGTCGTGCCCCACCTGCCCCTCCAGCCGCTCCGCGTatgggtgaggcgCTT…
ancHK + R27Q	pIN270	CGCCAGGTTgaaGAGCGTACTCgcatgcttgcgggcgtgagccatgatctgcgcaccccgctgacccgccttcgcctgCAAgtggaaatgatgccggatgatgaacgccgaaaaatggtgcgcgatattgatgaaatggaagcgatgattgatgcgtttctagcgtttgcgcgcggcgaagcggctgaaccgccggaaccggtggatctggcggcactgctagaagaggtggtggatgattttgcggatatgggcgcggaagtaaccctggatgcacctgaaccagtaaccgttcgcgctcgcccagttgcactgcgccgcgctctaagcaacctgattgataacgctgtacgctatggcggacaggtgcgcgtgagcctaagccgcgatggcgatcgc…
ancHK + E29A	pIN272	CGCCAGGTTgaaGAGCGTACTCgcatgcttgcgggcgtgagccatgatctgcgcaccccgctgacccgccttcgcctgcgcgtgGCGatgatgccggatgatgaacgccgaaaaatggtgcgcgatattgatgaaatggaagcgatgattgatgcgtttctagcgtttgcgcgcggcgaagcggctgaaccgccggaaccggtggatctggcggcactgctagaagaggtggtggatgattttgcggatatgggcgcggaagtaaccctggatgcacctgaaccagtaaccgttcgcgctcgcccagttgcactgcgccgcgctctaagcaacctgattgataacgctgtacgctatggcggacaggtgcgcgtgagcctaagccgcgatggcgatcgc…
ancHK + R27Q + E29A	pIN271	CGCCAGGTTgaaGAGCGTACTCgcatgcttgcgggcgtgagccatgatctgcgcaccccgctgacccgccttcgcctgCAAgtggcgatgatgccggatgatgaacgccgaaaaatggtgcgcgatattgatgaaatggaagcgatgattgatgcgtttctagcgtttgcgcgcggcgaagcggctgaaccgccggaaccggtggatctggcggcactgctagaagaggtggtggatgattttgcggatatgggcgcggaagtaaccctggatgcacctgaaccagtaaccgttcgcgctcgcccagttgcactgcgccgcgctctaagcaacctgattgataacgctgtacgctatggcggacaggtgcgcgtgagcctaagccgcgatggcgatcgc…
ancRR + R11E	pIN281	CCACGCATCCTTGTGGTCGACGACGATCCGgagTTGCGTGATTTGTTAGCACGTTACCTTTCACAGAATGGTTTCCGTGTGACAACAGCAGCTGACGCCGCTGAGATGGATCGTCGCCTGGCACGTGCGCGTTTTGATTTGGTGGTACTTGACGTGATGATGCCAGGTGAGGACGGTTTGAGTCTGTGTCGTCGCCTGCGCtcacgtGGCTCAGACGTTCCGATCATCATGTTGACCGCACGCGGTGAGGATACAGATCGTATCGTCGGGCTGGAAATGGGAGCCGACGATTATCTGGCAAAGCCGTTTAACCCACGCGAGTTATTAGCACGCATTCGCGCTGTTCTTCGTCGTGCGCCACCCGCACCACCGGGCGCGCCACGTatgggtgaggcgCTT…
ancHK1 + F	pIN290	CGTCAGGTTGAAGATCGCACGCGCATGTTGGCAGCCATTTCCCACGACTTGCGCACGCCTCTTACACGCCTTCGTttcCGTGTCGAAATGATTCCCGACGATGAGCGCCGCAAAATGGTCCGTGATATCGATGAAATGGAGGCTATGATTGACGCTACATTAGCCTTCGCGCGCGGAGAAGCAGCAGAACCTACGGAGCCTGTTGATCTGGCCGCCCTGCTTGAATCCATTTGTGACGACCTTGCTGACATGGGGGCAGATGTCACTTTGGAAGCTCCCGAGCCGGTGACAGTTCGTGCACGCCCTGTCGCACTTCGCCGTGCTCTTAGTAATCTGATCGACAACGCAGTACGCTATGGAGGACGTGCTCGTGTATCATTACAACGTGATGGCGACCGC…
ancHK-alt	pIN296	CGCCAAGTCGAAGACCGTACCCGCATGTTAGCTGGTGTTTCCCACGATTTACGCACTCCACTTACTCGCCTGCGCTTACGCATCGAGATGATGCCGGACGACGAGCGTCGTAAAATGGTGCGCGACATCGAAGAAATGGAAGCAATGATCGATAGTTTCCTGGCGTTCGCCCGTGGTGATTCATCGGAGCCAACAGAGCCTGTCGATCTTTCGGCCTTATTAGAAGAAATTTGCGATGATGCGTCTGAGATGGGCGCTGATGTCACGCTGGAAGCCCCAGATCCCCTGACCATCCAGGGTCGCCCAATTGCCTTACGTCGCGCCCTTACCAATTTAATCGATAACGCATTGCGTTATGGCTCACGTGTTCGTGTCTCCTTGTCCCGTGATGGCGATCAA…
ancHK1-alt	pIN297	CGTCACGTCGAAGAACGCACGCGCATGTTAGCTGCCATTTCACACGATCTTCGCACCCCGTTGACACGTCTGCGTTTGCGTATTGAGATGATGCCAGATGATGAGACACGCAAGATGGTCCGTGACATCGATGAAATGCAGGCCATGATTGATTCAGTGCTGGCCTTCGCTCGCGGAGATGCCAGCGAGCCCCCTCAGCCCGTGGACCTTGCGGCGCTTTTAGAAGCTGTGGTTGATGATTTTGCCGAAATGGGACATGAGGTTAGCCTGGATGCTCCGGATCCGATCGTAATTCAAGGACGTCCTGTAGCCTTACGCCGCGCACTTACGAACTTAATTGATAACGCGATCCGTTATGGCGGGCAAGCGCGTGTATCGCTGTCCCGCGATGGGGATCAA…
ancHK2-alt	pIN298	CGTCATGTCGAGCAACGCACCGCCATGTTAGCAGGAGTCAGTCATGACTTGCGTACGCCTCTTACTCGTTTGAAGTTACAATTGGCAATGATGCCTCCAGATGATGAACGCGAGATGCAGCAAGATGTGGAGGAGATGGAACGCATGATTGACGCCTATTTAGCTTTTGCCCGTGGAGAAGGTGGAGAGCCTGCTCAGCCCGTGGATTTAGGAGCACTGCTGGAAGAAATCTGTGACGATGCGCGTCGTGCGGGGGCTGAAATTTCATTAGACGTTCCTGACCCCATTGTCATCACATTACGTCCTATGGCATTGCGCCGCGCGCTTACTAATTTAATCGACAATGCTGCGCGTTATGGCGGCCAAGTACGTGTCTCGGTGAGTCGCGAAGGAGACTCC…
ancRR-alt	pIN299	CCTCATATCCTGGTCGTCGATGATGATCCACGCCTGCGCGAGTTGCTGGCGCGTTACTTGACGCAGAACGGTTTCCGTGTCACGACGGCTGCAGATGCAGCAGAGATGCAAAAGCGCCTGGCCGAGGAACGTTTTGATCTGATCGTATTAGACGTGATGATGCCAGGCGAGGATGGTTTGAGCATCTGTCGCCGTTTACGTCAGCGCGGTTCAAACGTCCCAATTATCATGCTTACGGCGCGTGGGGAGGAAACCGATCGTATTGTGGGTTTAGAGATGGGAGCTGACGATTATTTGGCTAAGCCATTCAATCCCCGTGAGTTGTTAGCTCGCATCCGTGCGGTACTGCGCCGTTCACCACCATCACCTCCAGGGTCTCCCCGCATGGGAGAGGCTTTA…
ancRR1-alt	pIN300	CCGCATATTTTAGTGGTGGACGATGACCCGGAAATCCGTGAGTTACTTGCCCGCTTTTTGCAGCAGAATGGCTTCCGCGTCACTACGGCTGCAGACGCAGCCGAAATGGAGAAGGCACTGGCGCGCTCTCGCATCGATTTAATTGTTCTTGATGTTATGATGCCTGGCGAGGATGGACTTTCAATTTGTCGTCGTTTACGTTCAGCATCCTCTAATGTTCCTATCATTATGTTAACGGCCATGGGTGAAGAGACGGATCGTATTGTGGGCTTGGAGATGGGGGCAGATGATTACTTGGCAAAGCCCTTCAACCCGCGTGAGTTACTTGCGCGTATTCGTGCGGTGCTGCGTCGCTCAGCCCCTGCACCTCCATCGGCTCCTCGTATGGGTGAGGCCTTG…
ancRR2-alt	pIN301	CCTCATATTCTGGTCGTGGACGACGACCCCCGCTTGCGTGAATTGCTGGCTCGTTATCTGACGGAGAACGGCTTTCGTGTGACGACTGCGGCGGACGCAGCCGAAGCACGCCAACGTTTAGCCGCGTTAAAGTTCGACTTGATTGTCCTGGATGTTATGATGCCCGGTGAGAACGGCCTTGAATTGACCCGTAGTTTACGTCAACGCGGCTCTGATGTGCCAATCCTGATGCTTACCGCCCGCGGAGAGGCAGAGGACCGCATTGCAGGACTTGAAGCTGGGGCCGACGACTACCTTGCCAAGCCCTTTGAACCTCGCGAACTTGTTGCACGTATCCGTGCAATTTTACGTCGTGCGCCCGCGAGTCCGCCCGCGTCACCGAAAATGGGGGAAGCTCTT…
