# Supplementary material for: Ancestral reconstruction of duplicated signaling proteins reveals the evolution of signaling specificity
Source: eLife journal article supplement (doi:10.7554/elife.77346), 2022-06-10
Supplement: supp [file elife-77346-supp-v1.zip › elife_poa_e77346_Supplementary_file_2.txt]

((((sp1637501:0.14087,((sp1896966:0.07071,sp1916320:0.08661):0.03097,(sp1906137:0.08429,((sp1906167:0.05765,(sp1262901:0.01561,sp1916322:0.03766):0.01846):0.05289,(sp1262759:0.05543,(sp1262838:0.00562,(sp1262899:0.00807,(sp1899017:0.03648,(sp1262849:0.01039,sp1897008:0.00887):0.03297):0.00779):0.02585):0.04835):0.01673):0.01461):0.02097):0.09791):0.29476,(sp1906157:0.34873,(sp1801607:0.12754,sp1801609:0.13445):0.3151):0.07221):0.08364,((sp454171:0.37868,(sp1895717:0.12432,sp661478:0.11597):0.4052):0.15594,(((((sp1797660:0.37385,(sp1935049:0.24414,((sp61435:0.00838,sp243164:0.013):0.25968,((sp1839801:0.07725,sp1217799:0.08377):0.04977,(sp943347:0.07671,sp552811:0.12942):0.03272):0.20813):0.12256):0.16841):0.10559,(((sp485913:0.16411,(sp732234:0.00694,sp1382306:0.01342):0.12657):0.25597,(sp1805080:0.42895,sp1640513:0.37459):0.07856):0.04839,((sp1128421:0.2367,(((sp383372:0.03063,sp357808:0.01982):0.12431,(sp765420:0.11136,(sp1707952:0.01688,(sp326427:0.0533,(sp324602:0.01719,(sp1521187:0.00363,sp867845:0.00674):0.02116):0.00829):0.0069):0.08853):0.08321):0.07988,(sp316274:0.00957,sp70996:0.03812):0.24427):0.03517):0.1363,(sp525904:0.33122,(sp479434:0.14921,sp309801:0.20872):0.12998):0.03569):0.06972):0.03154):0.03212,(sp1972460:0.42758,(sp926550:0.38883,(sp1971624:0.3093,(((sp1617415:0.19907,sp1805003:0.16446):0.09012,((sp360412:0.2032,(sp1895927:0.20635,(sp1678840:0.114,sp1889813:0.15429):0.13881):0.03319):0.02098,(sp926569:0.09324,sp229919:0.07811):0.072):0.03763):0.21032,(sp1617416:0.20804,sp1617414:0.22419):0.2512):0.05188):0.04171):0.0697):0.09073):0.0717,(sp1817892:0.69713,((sp1618350:0.5906,sp1618372:0.59628):0.19548,((((sp1801902:0.52969,(sp1619061:0.4209,((sp1801904:0.21205,sp1619068:0.22767):0.20181,sp1619067:0.38476):0.04392):0.06618):0.08847,((sp1801925:0.32165,(sp1801918:0.3026,((sp1805323:0.08731,sp1735162:0.09581):0.15772,(sp1801934:0.20468,sp1801943:0.21337):0.06118):0.05888):0.07122):0.29151,(sp1805210:0.62546,(sp1643353:0.55414,sp1394709:0.36391):0.51431):0.15412):0.06522):0.15322,((sp1618337:0.59777,sp1797472:0.74918):0.16455,(sp1797278:0.83273,((sp1618696:0.39983,((sp1801639:0.26519,(((sp1618894:0.19264,sp1618710:0.1639):0.09756,(sp1618709:0.22824,(sp1618707:0.04936,sp1618715:0.04689):0.2362):0.0696):0.04872,(sp1801638:0.16578,(sp1805255:0.06336,sp1805254:0.09826):0.11846):0.22093):0.02039):0.04657,(sp1801646:0.09145,sp1618723:0.08399):0.22862):0.08793):0.20561,((((sp1798543:0.52654,(sp1911907:0.53464,sp1798557:0.45925):0.07916):0.03265,(sp1618929:0.33654,sp1798462:0.4035):0.31888):0.04162,((sp1798540:0.38862,sp1798542:0.435):0.15811,(((sp1798009:0.35686,(sp1797532:5.5E-4,sp1797539:5.5E-4):0.36439):0.05015,(sp1805320:0.53869,((sp1618816:0.35333,sp1798002:0.32739):0.11467,(sp1797994:0.18891,sp1798000:0.22024):0.25442):0.04475):0.02625):0.05599,((sp1618994:0.28465,(sp1802385:0.31505,sp1802400:0.26195):0.05213):0.20485,(sp1619047:0.45391,((sp1798705:0.27645,(sp1798704:0.1614,sp1798709:0.15321):0.11831):0.12503,(sp1619044:0.32069,(((sp1798690:0.26829,(sp1619049:0.05315,sp1805239:0.07038):0.22459):0.05272,sp1798697:0.21135):0.04004,sp1619046:0.27638):0.03124):0.12916):0.11953):0.06326):0.05286):0.04683):0.02257):0.08357,(sp1817849:0.4061,(sp1817832:0.42372,(sp1817825:0.17673,(sp1817821:0.15048,(sp1817841:0.14904,sp1817834:0.14223):0.03782):0.04694):0.20372):0.07387):0.17447):0.03829):0.04088):0.03828):0.03915):0.0369,((sp1798539:0.42294,(sp1620412:0.13935,sp1798536:0.15038):0.28987):0.30752,(sp1618345:0.17963,sp1618346:0.14575):0.36264):0.05248):0.04453):0.05179):0.1055):0.04067,((((((sp653733:0.15196,sp118005:0.19617):0.26794,((((sp522772:0.18525,(sp1304888:0.11659,sp1674894:0.12837):0.07474):0.0614,sp1379858:0.31131):0.04718,(sp717231:0.22399,sp768670:0.22858):0.044):0.03819,sp639282:0.147):0.2443):0.10391,(((((sp869210:0.07626,sp670487:0.13002):0.03577,((sp276:0.05623,(sp751945:0.03241,(((sp798128:0.05016,sp482827:0.02461):0.01109,(sp56956:0.01938,((sp1449080:0.01223,(sp1449357:0.01058,(sp1123386:0.01545,sp743525:0.00573):0.00342):0.00657):0.01326,(sp1111069:0.01892,sp1330700:0.01785):0.00636):0.00529):0.00503):0.00404,(sp498848:0.01809,sp1123389:0.04249):0.01031):0.01474):0.03528):0.08102,(sp526227:0.0866,((sp604331:0.03665,(sp1122221:0.02014,(sp277:0.00701,sp504728:0.00465):0.01468):0.02583):0.09097,sp1122223:0.08367):0.03322):0.08398):0.04368):0.10528,(sp649638:0.26762,(sp1121382:0.12994,((sp693977:0.10721,(((sp695939:0.0343,sp1476583:0.02303):0.00791,(sp1121377:0.02925,(sp1121383:0.04149,(sp1540221:0.0239,sp319795:0.02272):0.01595):0.01068):0.01184):0.01529,((((sp1121378:0.00466,sp1182568:0.00688):0.05265,(sp1938608:0.03804,(sp1121380:0.01294,(sp249408:0.00483,sp1121381:0.00375):0.01281):0.05195):0.01205):0.01042,(sp546414:0.03424,sp684949:0.03955):0.00942):0.00879,((sp1736338:0.01295,sp745776:0.00492):0.03545,(sp856736:0.03019,(sp243230:0.01341,sp1288484:0.00773):0.02062):0.02962):0.01258):0.01884):0.02892):0.05039,(sp709986:0.06327,(sp937777:0.06616,sp926554:0.09736):0.03797):0.04293):0.05057):0.1337):0.08215):0.30317,(((((sp1162717:0.04932,(sp519441:0.00851,(sp1720557:0.01145,sp1712031:0.01723):0.00503):0.04789):0.09168,(sp1769291:0.09453,(sp1766719:0.07658,(sp187101:0.04009,sp40543:0.04651):0.05794):0.02122):0.06408):0.04304,((sp523794:0.00991,((sp1122173:0.01024,(sp1852388:0.00235,sp634994:0.00992):0.00438):0.00145,(sp1227268:0.00783,(sp1122172:0.00842,sp157687:0.01112):0.01151):0.00482):0.0058):0.06859,(sp714315:0.06004,(sp1321779:0.0164,sp712357:0.01016):0.03627):0.02609):0.03139):0.04358,sp526218:0.11322):0.15816,((sp1408439:0.13129,((sp180163:0.06423,(sp1319815:0.01566,sp1339239:0.01725):0.07432):0.03865,((sp469616:0.03204,(sp469618:0.00456,sp469617:0.00515):0.03428):0.07255,((sp859:0.01354,sp134605:0.00705):0.05939,(sp1278306:0.06091,(sp1852365:0.02737,((sp546275:0.00373,sp861452:0.00549):0.01672,((sp76857:0.00879,(sp469604:0.00595,sp76856:0.00885):0.00237):0.00415,(sp1408287:0.00822,sp76859:0.01539):0.00837):0.01232):0.02541):0.01677):0.05905):0.04535):0.02999):0.02319):0.03307,(sp572544:0.0994,sp1123032:0.17657):0.04642):0.12466):0.29639):0.0323,sp1104566:0.57264):0.02203):0.02098,(((((sp1158318:0.01346,sp1914305:0.0154):0.06485,(sp868864:0.05157,sp648996:0.065):0.03676):0.25919,(((sp123214:0.06926,(sp1158338:0.0045,sp1158345:0.00378):0.05572):0.08612,(sp436114:0.08729,(sp1123325:0.02746,sp204536:0.01677):0.05014):0.10501):0.14801,((sp380749:0.01453,sp547144:0.00555):0.318,(sp608538:0.12502,(sp381751:0.126,(sp638303:0.09723,(sp75906:0.04591,sp1313265:0.06706):0.06395):0.0319):0.05481):0.09162):0.16168):0.21018):0.09294,sp1298851:0.33135):0.05408,(((sp747365:0.5944,(sp515635:0.01979,sp309799:0.02411):0.34509):0.11361,((sp1150474:0.41852,((((sp1123380:0.06287,(sp484019:0.04249,(sp1462747:0.0338,sp46541:0.04747):0.03077):0.03756):0.10537,(sp1008305:0.06766,((sp2423:0.01568,(sp771875:0.00454,sp93466:0.00283):0.01462):0.05517,(sp381764:0.06154,sp1121883:0.06047):0.01962):0.03486):0.13166):0.08457,((sp309803:0.03642,((sp1157948:0.00132,(sp1231241:0.00617,sp390874:0.0111):0.0116):0.00458,sp243274:0.00127):0.03602):0.12427,(sp688269:0.13005,((sp1408159:0.04057,sp1635259:0.05269):0.08688,(sp416591:0.10199,sp1408160:0.09746):0.07183):0.04638):0.12098):0.04454):0.0728,((sp660470:0.20818,(sp521045:0.09734,(sp1330330:0.03579,sp1453497:0.05612):0.08087):0.04008):0.13165,((sp443254:0.03818,(sp1428448:0.02093,sp1122195:0.02558):0.03859):0.14501,(sp28234:0.21384,(sp1006576:0.11332,sp403833:0.15626):0.12518):0.09674):0.09495):0.04589):0.06308):0.12857,(sp1935102:0.03749,sp1935106:0.03144):0.50746):0.04234):0.04321,(sp1662110:0.28959,((sp580340:0.18397,(((sp572547:0.07677,sp1304875:0.05946):0.16337,((sp561720:0.08775,sp469381:0.07247):0.09232,(sp885272:0.15883,(sp1943580:0.0076,sp352165:0.00975):0.15191):0.10852):0.09909):0.04349,(sp1304874:0.1947,((sp1674908:0.09185,(sp2754:0.06434,(sp1197717:0.01133,sp457415:0.01518):0.02173):0.0477):0.11191,(sp584708:0.09217,(sp525903:0.0342,sp926567:0.03056):0.06848):0.05296):0.08065):0.03758):0.02786):0.05815,(sp891968:0.06361,sp592015:0.05813):0.16704):0.16192):0.10674):0.03235):0.03811):0.0372,(((((((sp1802579:0.13522,sp1802572:0.17094):0.30689,((sp1802571:0.2276,sp1802566:0.1885):0.09151,(sp1802567:0.20805,sp1802580:0.23869):0.07392):0.15423):0.25947,(sp1801829:0.60791,((sp1805286:0.43792,(sp1801831:0.35946,sp1801823:0.42877):0.05581):0.04605,(sp1956173:0.61931,((sp1801856:0.20372,(sp1801877:0.19514,(sp1801841:0.14753,sp1801857:0.12905):0.06022):0.07723):0.2046,(sp1805287:0.43376,(sp1801847:0.14674,sp1801867:0.15459):0.22381):0.04398):0.05532):0.07357):0.06131):0.08698):0.0326,(((sp1817894:0.51658,sp1797291:0.46519):0.04818,sp1817870:0.77582):0.03394,(sp1817861:0.56776,((sp1408281:0.10304,sp471821:0.20421):0.29204,(sp1797922:0.36495,sp445932:0.38693):0.1963):0.15389):0.0756):0.03178):0.03288,(((((sp673862:0.28795,(sp1619081:0.28333,sp1802376:0.26998):0.07607):0.0421,((sp1655312:0.28602,sp1619079:0.27375):0.03304,(sp1619075:0.37224,sp1619076:0.32869):0.08711):0.04223):0.12663,(sp1619077:0.38846,sp1619084:0.28499):0.11183):0.41502,(((sp598659:0.04513,sp990073:0.07759):0.16984,((sp223786:0.14497,(((((sp1123326:0.09206,(sp366522:0.0266,((sp1581011:0.00783,(sp1349789:0.00612,(sp1537915:0.00654,(sp1150621:0.00665,sp1193502:0.00103):0.00519):0.00946):0.01214):0.00643,(sp525898:0.01755,sp760154:0.01663):0.01256):0.00901):0.08666):0.05982,(((sp1031564:0.02038,(sp1388753:0.01589,(sp1500960:0.01111,(((sp201:5.5E-4,sp306263:0.00906):0.00209,sp1388752:0.0074):5.9E-4,sp1848766:0.00462):0.00327):0.00464):0.00619):0.03202,(sp1548153:0.08326,(sp1031742:0.06343,((sp28898:0.01503,sp888826:0.01468):0.03149,(sp1813019:0.03009,((sp192222:0.00289,sp683083:0.01008):0.00295,(sp195:0.01273,sp1365662:6.6E-4):0.00645):0.00492):0.01459):0.01186):0.0124):0.0138):0.06516,((sp32024:0.11591,((sp32019:0.06394,(sp1448857:0.08267,sp1032069:0.09881):0.04445):0.02793,(sp824:0.08782,sp360107:0.0991):0.03158):0.02565):0.0182,(((sp1660074:0.00882,(sp1660064:0.00509,(sp1660073:0.01344,sp75658:0.00473):0.00327):0.00752):0.02359,((sp32020:0.00598,sp1244529:0.00622):0.01855,(sp1031746:0.02123,sp1244531:0.02607):0.01022):0.01725):0.0567,((sp553218:0.00651,(sp1244083:0.00474,sp553219:0.00262):0.00264):0.06869,((sp360105:0.02312,(sp199:0.00763,sp360104:0.00592):0.02463):0.02043,(sp202:0.05479,sp1660067:0.04248):0.02463):0.02771):0.0343):0.01764):0.01637):0.08251):0.07426,(sp1177931:0.27537,(sp1539066:0.17297,((sp1537917:0.02824,(sp709032:0.01031,sp1249480:0.01704):0.03011):0.0941,((sp1802259:0.0229,(sp1802256:0.03548,(sp1802253:0.02676,sp326298:0.03394):0.00712):0.00819):0.03803,((sp1805214:0.06001,sp929558:0.03896):0.01719,(sp563040:0.05684,sp1172190:0.05483):0.01471):0.02215):0.07699):0.0612):0.04918):0.03948):0.01585,(((sp1539065:0.14185,((sp497650:0.09922,sp1539062:0.15205):0.04536,(sp1165841:0.03735,(sp1630136:0.01074,(sp206403:0.0068,sp387093:0.0053):0.01374):0.02924):0.07094):0.01622):0.03197,sp749222:0.10077):0.11205,(sp505249:0.06692,((((sp1355374:0.02874,((sp28198:0.02366,(sp1442598:0.01429,sp1355368:0.0127):0.01007):0.01454,(sp28200:0.02168,sp544718:0.04307):0.01803):0.0129):0.03984,sp367737:0.02108):0.01727,sp944547:0.02159):0.06302,(((sp1898176:0.03262,sp877500:0.05664):0.01662,sp1850254:0.06604):0.00832,(sp572480:0.08561,sp1665555:0.04694):0.01286):0.01507):0.01295):0.17754):0.03731):0.02416,((sp273121:0.09943,(sp35818:0.03577,(sp1449345:0.02831,(sp1548151:0.0163,sp556267:0.01601):0.02046):0.02338):0.08851):0.02736,((sp50960:0.01456,sp37372:0.00831):0.15049,(((sp1408442:0.04942,sp222136:0.063):0.0659,(sp1591088:0.12848,(sp1548149:0.06246,(((sp235279:0.03703,sp1677920:0.0562):0.00816,sp425400:0.04248):0.00371,(sp76936:0.04277,sp1172562:0.03554):0.01163):0.01791):0.04207):0.03988):0.02267,((sp1325130:0.07355,(sp1357400:0.08358,sp1357399:0.07509):0.02165):0.06654,((sp182217:0.02159,(sp1163745:0.01516,(sp382638:0.01396,(sp210:0.00579,(sp1345592:0.00697,sp85962:0.00413):0.0044):0.00404):0.02841):0.01233):0.08653,(sp936155:0.06592,((sp1002805:0.00433,sp1002804:0.00438):0.05379,(sp104628:0.07532,(sp1578720:0.01693,(sp1216962:0.00901,sp35817:0.00477):0.01516):0.03639):0.01978):0.0243):0.09136):0.08643):0.01448):0.01929):0.04599):0.12232):0.02762):0.03277,(sp1069081:0.03721,sp387092:0.03483):0.1028):0.07975):0.36619,((sp694431:0.02755,sp1562698:0.07348):0.26492,(sp944479:0.05597,(sp944480:0.06498,(sp944481:0.02338,sp760142:0.0443):0.03631):0.02127):0.16813):0.23931):0.06148):0.04819,((sp1802195:0.46077,(sp869212:0.51843,(sp183:0.46451,(((sp456481:0.00528,sp1249483:0.00537):0.00358,(sp1193051:0.00718,(sp1257025:0.00467,(sp1218591:0.00418,sp1218599:0.0029):0.00338):0.00773):0.0026):0.1767,(((sp28182:0.00842,(sp44275:0.00341,sp173:0.00584):0.00471):0.00857,((((sp28184:0.00551,sp100053:0.00371):0.00474,(sp1192864:0.00623,(sp1192866:5.4E-4,sp328971:0.00679):0.00678):0.00453):0.00333,(sp28183:0.01329,(sp1218598:0.00663,sp28452:0.01004):0.00731):0.00288):0.00225,sp1049970:0.01494):0.00981):0.06871,((sp1049789:0.00423,sp1193011:0.00436):0.02944,(sp1193069:0.02082,(sp1049971:0.00629,sp1242992:0.0061):0.01653):0.02328):0.0715):0.1294):0.18539):0.10309):0.08858):0.13102,((sp34097:0.41825,sp1802190:0.30148):0.39511,(((sp1802179:0.24334,sp1802184:0.27493):0.25189,(((sp1245910:0.0166,((sp1674146:0.01357,(sp521010:0.00883,sp521007:0.00675):0.00319):0.00685,(((sp1398491:0.01356,sp29519:0.01543):0.002,(sp29518:0.00935,sp498742:0.01649):0.0067):5.5E-4,sp34095:0.02172):0.00349):0.01607):0.08332,(sp47466:0.06176,((sp1417230:0.03741,(sp412419:0.00724,sp1417229:0.00882):0.0263):0.02425,(sp1365188:0.05587,((sp140:0.00666,sp1313291:0.00888):0.0208,(sp1313294:0.02924,sp1313292:0.04159):0.00756):0.00452):0.00512):0.01307):0.05988):0.46925,(sp665571:0.31468,(((sp1918508:0.19143,sp1802177:0.20501):0.0914,((sp744872:0.0775,(sp545695:0.0908,(sp545694:0.0399,sp717227:0.04):0.03777):0.05768):0.07873,((sp906968:0.08137,((sp1125699:0.05115,sp1321815:0.04517):0.08164,(sp1908540:0.1598,((sp225004:0.11235,sp869209:0.14041):0.03524,((sp1125701:0.0154,sp1125725:0.01396):0.13935,(sp261392:0.0956,((sp1124982:5.0E-4,sp1410609:0.00108):0.05714,(sp163:0.00464,sp877418:0.01147):0.05866):0.05665):0.02279):0.04338):0.0652):0.02354):0.01993):0.05691,((sp1674866:0.06048,sp1674865:0.05278):0.05909,((sp221027:0.01288,sp243275:0.00815):0.12846,(sp162:0.10162,(sp596324:0.0078,(sp1125700:0.00681,sp1539298:0.00444):0.00376):0.09553):0.02873):0.10737):0.02926):0.08887):0.03836):0.11543,((sp1123275:0.24872,(sp1307761:0.20599,((sp942938:0.01542,sp159291:0.01626):0.21474,sp889378:0.20486):0.05438):0.06503):0.04564,(((sp1802181:0.16187,((sp1930011:0.18832,sp760011:0.15054):0.02331,(sp1674858:0.07069,(sp158190:0.0528,((sp1674860:0.06818,sp1674859:0.07047):0.0912,(sp1918502:0.0133,sp158189:0.02067):0.02134):0.0303):0.06759):0.02):0.03746):0.16026,(sp573413:0.00373,sp1123274:0.00507):0.17769):0.05713,sp1963862:0.19329):0.03475):0.03652):0.05625):0.04966):0.0998):0.09971,(sp1802174:0.55554,(sp1262760:0.08595,(sp1408430:0.02238,(sp526224:0.0155,(sp565034:0.00834,(sp1289135:0.00401,sp1287055:0.00423):0.00762):0.00904):0.0116):0.03309):0.492):0.08069):0.02797):0.0353):0.08923):0.0278):0.02315,((sp1868283:0.60246,(((sp1801981:0.30885,(sp237368:0.32078,(sp1801982:0.07146,(sp247490:0.09987,(sp795830:0.06623,(sp1961113:0.05243,sp1961114:0.0484):0.03942):0.02899):0.03011):0.16346):0.06607):0.13969,(((((sp980251:0.24628,(sp1632865:0.23318,(sp595460:0.05603,(sp595434:0.01087,(sp1263868:0.00122,sp243090:0.00244):0.00611):0.04578):0.15677):0.0469):0.02499,(sp530564:0.2191,sp314230:0.21551):0.04088):0.15679,((sp1123242:0.20674,(sp1841610:7.2E-4,sp521674:0.00445):0.17075):0.129,((sp344747:0.19208,sp1891926:0.25068):0.04228,(sp756272:0.22728,(sp1576369:0.20185,sp1632864:0.22266):0.07541):0.04086):0.02376):0.1282):0.07383,((sp575540:0.1551,((sp1882752:0.01024,sp886293:0.00269):0.08137,(sp1636152:0.06061,sp1387353:0.05041):0.06723):0.06605):0.18908,(sp1123508:0.21913,(sp1210884:0.00146,sp1630693:5.5E-4):0.2362):0.23386):0.05373):0.11312,(sp1142394:0.5501,((sp1851148:0.18998,(sp1941349:0.01423,sp1940790:0.02081):0.19109):0.07395,((sp1936003:0.16812,sp1971638:0.17499):0.03669,(sp1674905:0.20663,(sp1801957:0.13544,sp1801952:0.14799):0.13136):0.045):0.05639):0.18909):0.09948):0.07344):0.18101,((((sp83560:0.00932,(sp272561:0.01531,sp83559:0.02387):0.00436):0.07389,((sp1238237:0.05302,((sp1143323:0.02754,sp1229831:0.02672):0.0552,((sp331636:0.00475,sp1003238:0.00938):0.01223,(sp264202:0.02325,sp227941:0.02452):0.00614):0.02978):0.01682):0.00967,((sp1806891:0.07442,sp406984:0.04112):0.02821,sp331635:0.09064):0.02365):0.0411):0.27841,(sp1704235:0.43636,((sp1437425:0.21592,(sp716544:0.20863,(sp83552:0.20255,((sp1314958:0.15863,(sp1414722:0.04399,sp389348:0.04101):0.10502):0.02341,((sp1895743:0.04357,sp1478175:0.06053):0.09609,sp1444712:0.17504):0.03214):0.01909):0.0314):0.02989):0.09624,(sp1797610:0.30438,(sp331113:0.24793,(sp1752208:0.19644,sp1797595:0.25234):0.04892):0.03173):0.04946):0.04464):0.06235):0.34844,((((sp382464:0.2486,((sp1838286:0.03194,(sp1882749:0.02182,sp1752234:0.02277):0.02652):0.1208,(((sp1637999:0.11679,(sp278959:0.04025,sp794903:0.03305):0.06167):0.03303,sp1184151:0.11021):0.02113,(sp452637:0.10418,(sp1548207:0.02028,sp1548208:0.02751):0.11714):0.02233):0.04033):0.10682):0.06461,(((sp1802431:0.26561,sp1805421:0.34581):0.04591,sp583355:0.28604):0.02275,(sp1674913:0.31047,(sp1897025:0.07976,sp1262865:0.07684):0.19783):0.0503):0.05646):0.23806,(sp320771:0.35685,((sp1882831:0.22539,((sp1134055:0.0685,sp478741:0.05481):0.21499,(sp481448:0.07791,sp1156937:0.07677):0.22141):0.13364):0.12034,((sp497964:0.17832,(sp690879:0.1265,sp1704307:0.31634):0.09088):0.05874,((sp48467:0.1717,(sp1403819:0.00997,(sp1396418:0.00173,sp240016:0.00199):0.00379):0.12867):0.11581,((sp1679444:0.10176,(sp1574264:0.03231,sp239935:0.00673):0.10536):0.13502,(sp1396141:0.16355,(sp1123071:0.065,sp1123070:0.08733):0.11191):0.04478):0.10365):0.14988):0.07944):0.06728):0.05906):0.07969,((sp1798576:0.33376,sp1307763:0.35105):0.13816,(sp313628:0.41741,(sp1798570:0.31168,(sp1798571:0.22193,(sp1798573:0.05645,sp1798574:0.05803):0.22809):0.08103):0.15659):0.12722):0.03891):0.08549):0.05687):0.0312):0.04311,((sp459349:0.60461,(sp1635278:0.53643,(sp1935123:0.43963,sp1703779:0.52709):0.08302):0.07196):0.05298,(((sp1379698:0.39577,(sp1817856:0.42079,sp1817850:0.40481):0.07532):0.03445,(sp1817867:0.37034,(sp1805193:0.24429,(sp379066:0.121,sp861299:0.10909):0.15914):0.17214):0.10183):0.03914,((sp1008392:0.40902,((sp1704279:0.03175,sp1704280:0.07832):0.21803,(sp28122:0.10411,(sp1674899:0.07097,(((sp1896210:0.00177,(sp1938898:0.00314,sp1896224:0.0035):0.00551):0.01874,(sp1896209:0.02437,sp1896212:0.01402):0.02423):0.01033,(sp1896202:0.03228,(sp1896217:0.03088,sp1896216:0.0236):0.01329):0.01118):0.06446):0.04499):0.09069):0.38155):0.13491,((((((sp331678:0.07761,(sp290512:0.048,sp1868325:0.07195):0.03368):0.04148,((sp517417:0.03669,(sp274537:0.01578,(sp194439:0.01365,sp1674889:0.00336):0.00915):0.02237):0.08989,((sp1092:0.00277,sp290315:0.00266):0.04664,(sp290317:0.05789,((sp1100:0.04468,sp290318:0.0557):0.03578,((sp340177:0.09431,sp324925:0.033):0.0173,sp1917528:0.06584):0.01629):0.01682):0.01669):0.04685):0.02613):0.1254,(sp517418:0.14164,sp1519464:0.27417):0.0579):0.24504,((((((sp1313421:0.18103,sp984262:0.15429):0.10645,((sp760192:0.18814,(sp1122176:0.1235,(sp1803372:0.06389,(sp478744:0.04357,sp1122179:0.04975):0.02637):0.14745):0.05749):0.03785,(sp1617420:0.20424,sp1617419:0.20886):0.0363):0.05417):0.09217,(sp1895921:0.28984,(sp1393122:0.15842,(((sp1895925:0.06234,(sp1985173:0.04512,sp1895924:0.04096):0.02872):0.0606,(sp1895923:0.1019,sp1895926:0.09301):0.05531):0.06018,((sp1004:0.03044,(((sp1881040:0.00771,sp1884367:0.00739):0.02855,(sp573321:0.03658,((sp536979:0.04868,sp1335309:0.06135):0.01211,((sp29529:0.00392,sp393003:0.00516):0.01252,((sp634771:0.01833,sp1419482:0.02703):0.0066,sp408074:0.04226):0.00433):0.03286):0.00989):0.02078):0.00764,(sp104663:0.01408,sp485918:0.018):0.00512):0.03026):0.08881,(sp1895834:0.13278,(((sp1895835:0.09808,(sp1220578:0.08973,sp1123248:0.10218):0.01766):0.03179,((sp1465490:0.09095,(sp477680:0.08285,(sp551991:0.11858,(sp714549:0.07703,((sp1267211:0.00891,sp1802166:0.0148):0.04211,(sp413434:0.02679,(sp1235997:0.00148,sp925409:0.00311):0.03181):0.0172):0.0243):0.02522):0.01018):0.01648):0.03488,(sp1895841:0.06942,(sp1691979:0.0399,((sp354355:0.01174,sp700598:0.01107):0.01104,(sp550983:0.01911,sp1703345:0.0152):0.0271):0.05107):0.04005):0.03174):0.01305):0.01069,((sp1302690:0.05155,(sp1492898:0.03884,sp1121884:0.04815):0.01765):0.04028,(((sp1285928:0.01375,sp1122605:0.012):0.01081,(sp929713:0.02045,sp1176587:0.02728):0.02984):0.07677,((sp1895839:0.04223,((sp1961110:0.10659,sp1985174:0.05282):0.00919,sp1895838:0.01982):0.0308):0.02217,sp1123356:0.05207):0.01588):0.03276):0.04445):0.01682):0.03907):0.02553):0.04932):0.12223):0.05393):0.0864,((((((sp1797344:0.14694,sp1797343:0.16822):0.03721,((sp1797342:0.15837,sp1674833:0.19886):0.02978,((((((sp1688776:0.11574,(sp1797351:0.0913,(sp655355:0.05662,sp1409788:0.03545):0.04737):0.039):0.03189,((sp1544798:0.00465,sp1168034:0.00664):0.06891,(sp1484053:0.04945,sp1168035:0.06202):0.03801):0.03764):0.03695,sp1408473:0.11185):0.0598,((sp1236979:0.115,((sp1720195:0.02809,(sp1816677:0.01553,sp1121130:0.01143):0.04137):0.03388,(sp709991:0.04603,(sp742817:0.02146,sp1841857:0.04923):0.02258):0.03549):0.09141):0.03543,(((sp1849719:0.06977,(sp869213:0.01707,sp1477105:0.0272):0.0255):0.07781,((sp385682:0.05185,(sp886379:0.02513,sp1168289:0.04899):0.01924):0.05786,(sp889453:0.04628,sp1236989:0.07977):0.05132):0.03794):0.04179,(((sp1262736:0.06467,(sp665949:0.02396,sp1686296:0.03581):0.02361):0.02625,(((sp880074:0.01171,sp742726:0.00999):0.04973,(sp1262927:0.1633,(sp1807743:0.09459,((sp1897040:0.05433,(sp1807734:0.06158,sp1807751:0.05687):0.0318):0.01193,((((sp1834200:0.03341,(sp1807732:0.02118,sp1807755:0.02423):0.01624):0.03748,sp1807735:0.06195):0.01057,(sp1262917:0.07918,sp1807736:0.06626):0.01553):0.00859,sp1262753:0.05769):0.00913):0.01812):0.03264):0.06016):0.02435,(sp511995:0.27146,(sp681398:0.0907,(((sp1895899:0.05404,(sp1658779:0.07598,sp1895718:0.12112):0.03183):0.01016,sp694427:0.05932):0.04753,sp575590:0.18378):0.01474):0.03013):0.02225):0.02695):0.01446,((((sp1297750:0.0438,((((((sp1121100:0.00422,sp1235813:0.00961):0.01722,(sp818:0.01157,(((((sp871325:0.01426,sp47678:0.0063):0.0023,sp338188:0.00487):0.00142,sp1871006:0.00696):0.00118,sp1235814:0.00604):0.00156,(sp1796613:0.00226,sp28116:0.0036):0.00236):0.00302):0.00549):0.00743,(sp817:0.01406,(sp291644:0.01362,sp997884:0.00707):0.00981):0.00591):0.00341,((sp742727:0.00503,(sp246787:0.00428,sp471870:0.00394):0.00501):0.01303,(((sp1121096:0.00452,(sp483216:0.00505,(sp46506:0.00288,sp762984:0.00219):0.0011):0.0018):0.00567,(sp1903262:0.01189,(sp1917883:0.00726,sp1841865:0.01251):0.01165):0.0065):0.00257,((sp763034:0.00692,(sp1852362:0.05481,sp1445607:0.03369):0.02051):0.02459,(sp693979:0.01257,sp820:0.00603):0.00208):0.00314):0.01055):0.00874):0.01152,sp1347393:0.03237):0.00746,sp1121097:0.05492):0.00807):0.01385,(sp679937:0.04252,sp1121099:0.04984):0.08414):0.01397,((((sp1855373:0.09297,(sp762968:0.00391,sp762982:0.00479):0.04748):0.01171,(((sp1262933:0.06233,sp1262935:0.07065):0.01163,((sp1852368:0.00542,sp1035197:0.0033):0.08983,((sp1262937:0.02706,sp1852370:0.02431):0.01962,(sp626522:0.08712,sp679199:0.05959):0.05276):0.00623):0.01498):0.03893,((((sp645274:0.01885,sp1410666:0.04788):0.02419,((sp839:0.00459,(sp1410613:0.00178,(sp264731:0.00445,sp1408310:0.00542):0.00364):0.00281):0.01237,(sp1761886:0.01388,(sp1761887:0.00991,sp1761885:0.01029):0.00567):0.00485):0.02396):0.01277,(sp1761889:0.03461,(sp1520830:0.02546,sp1761888:0.01579):0.01656):0.01706):0.03186,(((sp1002367:0.05864,(sp862515:0.06542,(sp1127699:0.04759,(sp1122991:0.00839,(sp1197728:0.00583,sp619693:0.00364):0.00439):0.01995):0.02676):0.01127):0.00835,(((sp1280674:0.05862,((sp883158:0.0894,(sp28128:0.02844,((sp997353:0.01508,sp997352:0.01497):0.02081,(sp28131:0.00484,(((sp866771:0.01553,((sp1392486:0.02244,(sp1236509:0.02606,((sp857291:0.01068,((sp888743:0.01139,sp767031:0.00922):0.00796,(sp1236517:0.00541,((sp1095752:0.00225,sp649761:0.00409):0.00571,((sp563031:0.00396,(sp1227276:0.00503,sp1236518:0.00795):0.00251):0.0012,sp553174:0.004):0.00239):0.00386):0.00173):0.0031):0.01316,(sp28125:0.01257,sp419005:0.02148):0.03266):0.01607):0.01351):0.01221,sp1917878:0.0211):0.01157):0.01304,sp1236508:0.01214):0.00444,sp1122983:0.00864):0.0206):0.00591):0.02244):0.01897):0.02942,sp688246:0.07795):0.01227):0.01941,(sp1776379:0.05111,(sp76123:0.01186,sp1236494:0.01402):0.03704):0.01035):0.02333,((((sp1384078:0.04801,(sp1122980:0.04972,(sp1122990:0.03798,((sp649760:0.01211,sp888832:0.01683):0.00672,(sp999422:0.02441,(sp28136:0.0028,sp1433844:0.00765):0.02808):0.00524):0.01214):0.01388):0.00899):0.00858,((sp77095:0.04498,sp1122978:0.04075):0.01565,(sp537011:0.05471,(sp1262922:0.06252,sp873513:0.04648):0.01288):0.00616):0.00722):0.00559,((sp1262926:0.05531,(sp1855325:0.05708,sp1761883:0.03703):0.01442):0.0053,(sp1262938:0.06435,(sp908937:0.03555,((sp1497954:0.03499,sp585502:0.03736):0.0207,sp1284775:0.0473):0.01848):0.01483):0.02516):0.00625):0.01218,((sp1122992:0.03446,(sp679190:0.00751,sp1111130:0.00427):0.02311):0.03433,sp28134:0.03937):0.01041):0.00558):0.00949):0.01297,(sp1602171:0.04797,(sp1262918:0.03514,sp1676614:0.02253):0.01668):0.01682):0.01411):0.08083):0.01864):0.01675,sp1896974:0.14514):0.03058,((sp1204719:0.10868,((sp1236498:0.0412,((sp821:0.02463,sp1235788:0.00409):0.00743,sp1121098:0.01893):0.00956):0.00777,(sp1121094:0.01069,(sp667015:0.03732,((sp162156:0.00992,sp1841856:0.00463):0.00449,(sp547042:0.01769,(sp1907658:0.01412,sp470145:0.00687):0.00216):0.00235):0.00222):0.0041):0.02082):0.00913):0.01112,sp1262740:0.04913):0.00837):0.01548):0.05947,((((sp1298597:0.0284,(sp1658008:0.02784,(sp742767:0.03041,(sp742766:0.01837,sp1158294:0.01779):0.00701):0.00698):0.00711):0.02591,(sp1658009:0.03395,(sp1346286:0.01193,sp1121485:0.01481):0.04817):0.03607):0.03753,(sp1918497:0.11468,((((sp1895721:0.07472,sp1123008:0.00548):0.00235,sp1642647:0.00499):0.01941,(sp1797327:0.03983,sp1562970:0.05759):0.01161):0.02766,sp1642646:0.04854):0.02088):0.05398):0.02931,((((((sp879243:0.01136,(sp1122976:0.0046,sp596327:0.00376):0.00621):0.15558,(sp553175:0.05884,(sp1497953:0.19295,(sp266762:0.01101,sp29524:0.01227):0.04712):0.03814):0.05935):0.0527,(sp28115:0.09862,((sp1127696:0.02105,(sp322095:0.01074,sp1227272:0.01258):0.0146):0.08272,(sp1515613:0.04486,sp1515617:0.03636):0.02396):0.04707):0.02078):0.01578,(sp111105:0.02363,sp837:0.00393):0.07745):0.02519,(((sp1720317:0.12568,(sp1122971:0.00976,sp1739394:0.01383):0.2154):0.03188,(sp1739529:0.04126,sp1122973:0.05499):0.08306):0.06871,sp36874:0.08105):0.08283):0.04475,((sp1673718:0.05944,(sp1262913:0.03548,(sp435591:0.02074,((sp537006:5.1E-4,(sp46503:0.00247,sp1750560:0.00534):0.00122):0.0131,(sp328812:0.00759,(sp1871013:0.00302,sp1203610:0.00319):0.00724):0.01266):0.00811):0.00772):0.01688):0.01322,(sp1917887:0.06271,sp203275:0.0887):0.01482):0.02507):0.0198):0.02378):0.01507):0.09915):0.0336):0.01679):0.0292,(((sp1797341:0.11621,sp1797328:0.0376):0.1032,sp1797319:0.17475):0.03032,((sp1339253:0.11599,((((sp1945891:0.05965,(sp1262742:0.02564,(sp1262751:0.0224,sp1262748:0.01989):0.01015):0.05089):0.03005,((sp1262695:0.0111,sp1262696:0.04398):0.05801,(sp1896975:0.05049,sp1945890:0.04722):0.06079):0.02686):0.13248,((sp1674824:0.06328,(sp1674823:0.03859,sp1671665:0.02484):0.02785):0.08532,(sp1797333:0.05632,(sp1895922:0.05187,(sp1797347:0.04504,sp1400053:0.04549):0.01618):0.0146):0.04286):0.0336):0.08429,((sp1433126:0.12905,(sp1871023:0.01608,sp880526:0.00865):0.0598):0.04835,((sp742725:0.05325,sp1211813:0.05081):0.0668,(sp1871003:0.09272,(sp1118061:0.03781,(((sp1033732:0.00381,(sp1930002:0.00791,(sp1033731:0.0046,sp1816676:0.00246):0.00208):0.00393):0.01981,(sp214856:0.0121,sp679935:0.00947):0.00994):0.01919,(sp28117:0.04168,sp1780376:0.03072):0.00982):0.01838):0.07029):0.02538):0.03098):0.06141):0.02638):0.03631,sp1855401:0.18601):0.04734):0.01878):0.01332,(sp1307839:0.16951,sp1797335:0.1514):0.04873):0.01378):0.03593):0.05037,(sp1797340:0.25301,((((sp1768114:0.20314,(sp1797339:0.18127,sp1671664:0.30913):0.06676):0.03114,sp1805033:0.29574):0.01728,sp1678841:0.1555):0.04006,(sp1797348:0.2056,sp1797337:0.15715):0.03536):0.02908):0.02871):0.02595,(sp1797364:0.17693,sp1617421:0.21647):0.05151):0.02728,((sp1622232:0.20406,((sp1740263:0.05818,sp1408433:0.07243):0.0985,(sp477690:0.08461,(sp1895763:0.11057,(sp755732:0.04061,sp1798018:0.04166):0.05127):0.05676):0.05184):0.05207):0.0524,((((sp1133592:0.42865,((sp706194:0.11088,(sp336810:0.07154,sp595499:0.11163):0.06956):0.29874,((sp331104:0.08302,(sp1186051:0.0569,(sp1229512:0.07322,sp1316444:0.06922):0.01158):0.05118):0.05087,((sp600809:0.01454,sp1072467:0.02031):0.07392,(sp1074889:0.11438,sp1075399:0.10135):0.03214):0.02867):0.20094):0.12782):0.16826,(sp1150389:0.1294,((sp1586267:0.11302,(((sp1118202:0.07483,sp883096:0.03996):0.02521,((sp619805:0.03838,(sp237258:0.04978,(sp1117645:0.00815,sp238:0.00615):0.0438):0.01422):0.00883,(((sp1125876:0.09193,((sp1608584:0.02254,sp531844:0.02622):0.00818,(sp1121288:0.02297,(sp510955:0.01996,(sp266748:0.02685,(sp713588:0.0058,sp266749:0.01312):0.01603):0.00971):0.00994):0.00965):0.00971):0.01876,sp1304281:0.03204):0.02271,((((sp311333:0.01415,(sp1612149:0.00278,(sp1705393:0.01063,sp1302687:0.00252):0.00297):0.01051):0.00526,(((sp254:0.00539,(sp59733:0.00603,(sp1664319:0.00287,sp246:0.00117):0.00403):0.00675):0.00325,(sp551459:0.0067,(sp1736361:0.00701,sp1736366:0.00921):0.00598):0.03071):0.00532,(((sp1742858:0.00643,sp1500286:0.02502):0.00483,sp452084:0.00524):0.00594,sp1736289:0.0288):0.00677):0.0072):0.00503,(((sp1500285:0.00591,sp297244:0.0065):0.00898,(sp1816690:0.00955,sp421058:0.0065):0.0107):0.00761,(((sp1121287:0.0044,sp1735672:0.00297):0.01493,((sp1141221:0.01734,((((sp356305:0.01167,((((sp295069:0.00444,(sp1302685:0.00453,sp311334:0.00791):0.00286):0.00137,(sp373672:0.00879,sp1907397:0.00843):0.00223):0.0044,sp491205:0.00751):0.00409,sp1121286:0.00666):0.00288):0.00282,(sp1500293:0.01067,((sp680127:0.00532,((sp1500295:0.00131,((sp1805473:0.0019,(sp445960:0.00839,sp373668:0.004):0.00318):0.00219,sp253:0.00838):0.00418):0.00148,(sp1907398:0.00112,(sp1423959:0.00543,sp525257:0.00272):0.00519):0.0012):0.00257):0.00156,(sp1500292:0.00207,(sp112234:0.00908,sp1500294:0.00182):0.00452):0.00421):0.0061):0.00974):0.00276,sp1500284:0.01299):0.00336,sp1674291:0.01112):0.00489):0.0044,(sp236814:0.01092,(sp363331:0.00735,sp1416778:0.00787):0.01041):0.00834):0.00474):0.00331,(sp1500290:0.01125,sp1736367:0.01111):0.00473):0.0031):0.00421):0.02458,((sp1121284:0.015,(sp216903:0.00684,(sp1895905:0.01384,sp420404:0.00756):0.00372):0.00355):0.00498,(((sp1121870:0.0058,(sp1792309:0.00326,(sp1233951:0.00103,sp421072:0.00178):0.00259):0.00327):0.0288,(sp1121285:0.00232,sp454006:0.00226):0.00463):0.00436,sp1416779:0.00976):0.00959):0.0229):0.01418):0.00774):0.01212):0.01381,(sp1071918:0.03556,sp1123058:0.03044):0.02172):0.09383):0.05237,(sp867902:0.14547,(sp1434700:0.08387,((sp684065:0.02245,(sp1434701:0.01091,(sp1218108:0.00864,sp343874:0.00952):0.00572):0.00813):0.04536,(sp1816680:0.03871,(sp865938:0.01344,sp1461577:0.00893):0.03685):0.02891):0.0388):0.05501):0.03435):0.03372):0.0335):0.03496,((((sp1850246:0.06638,(sp762486:0.04451,(sp593133:0.03977,sp1622118:0.0698):0.01535):0.03429):0.02304,((sp1042376:0.04731,(sp1195760:0.00852,sp1790137:0.00986):0.02896):0.07814,((sp1805159:0.06848,(((((sp1250006:0.00565,sp1774273:0.00396):0.02662,sp1855336:0.02952):0.00731,(sp1336804:0.01998,(sp1250005:0.01757,sp1333662:0.02389):0.00822):0.00539):0.00497,(sp313594:0.0658,sp1529069:0.0152):0.01158):0.00534,(sp996801:0.01553,(sp1300348:0.00476,sp313598:0.00438):0.01673):0.00883):0.01249):0.02715,(sp1349785:0.03451,(((sp447689:0.01256,(sp104270:0.01133,sp669041:0.02402):0.01161):0.02015,(sp1250198:0.03195,((sp104268:0.01161,sp1380384:0.0102):0.00817,(sp1635173:0.0227,(sp1250059:0.05928,sp1908389:0.03841):0.00952):0.00804):0.0097):0.00845):0.01846,sp1850252:0.04617):0.00807):0.01351):0.03797):0.01605):0.03927,sp487796:0.16769):0.02115,((((sp1159016:0.00964,sp913024:0.01711):0.03331,(sp1150112:0.04721,(sp256:0.02417,(sp1008457:0.02403,(sp76832:0.02011,sp702745:0.01914):0.03029):0.00879):0.01529):0.02772):0.02431,(sp1406840:0.0289,(((sp1202724:0.03501,sp96345:0.04022):0.00459,(sp1860086:0.0594,((sp1341154:0.00543,(sp1341181:0.00535,sp329186:0.007):0.00217):0.02371,((((sp683124:0.03594,(sp1094466:0.02808,(sp1299341:0.03773,sp402734:0.03082):0.02719):0.01551):0.01359,sp1603293:0.036):0.0117,sp1121891:0.0654):0.00845,(sp1121889:0.04342,(((((sp1736351:0.0268,((sp415425:0.01601,sp996:0.03582):0.02033,((sp1798014:0.00872,(sp416016:0.00609,sp1121896:0.00219):0.00424):0.0387,(sp1121899:0.01901,sp1107311:0.01805):0.01313):0.01963):0.01996):0.00945,sp1034807:0.04168):0.02417,(((sp1121897:0.01457,(sp1111730:0.03087,sp1121901:0.00619):0.03495):0.00515,sp1128970:0.0247):0.00769,((sp938709:0.02814,sp498292:0.03987):0.0099,((((sp1729581:0.02694,(((sp29533:0.00222,(sp1270193:0.00416,sp29534:0.00192):0.00257):0.00159,((sp946677:0.00136,((sp1736485:0.00184,sp1882758:9.6E-4):0.00307,(sp1736605:0.00508,((sp1736610:0.00388,(((sp739143:0.00353,(sp1121888:9.9E-4,sp1506583:0.00489):0.00188):0.00251,sp376686:0.00106):0.00189,sp370979:0.00373):0.0041):0.00213,sp986:0.00503):0.00208):0.00339):0.0014):0.00255,sp1278819:0.00403):0.00393):0.00251,(((sp1453505:7.9E-4,sp1938609:5.5E-4):0.00641,sp1144313:0.00247):0.0011,(sp1423322:0.00565,(sp37752:0.00306,((sp1742859:0.00371,(sp1179672:0.00111,sp262320:0.0027):0.00239):5.1E-4,(sp1736533:0.0019,sp362413:0.00166):0.00153):0.00153):0.00114):5.8E-4):0.00213):0.00658):0.00592,(sp1566023:0.0028,sp991:0.00283):0.00749):0.00669,(sp1798013:0.0165,(sp29536:0.01287,((sp280093:0.00612,(((sp1086011:0.0015,sp229203:0.00154):0.0094,(sp1189620:0.0108,(sp229204:0.00509,sp150146:0.00146):0.00297):0.0075):0.00911,(sp1763534:0.01131,sp1121890:0.00675):0.00843):0.00933):0.00646,(sp983:0.0035,((sp551990:0.00565,(sp1121887:5.5E-4,sp350893:5.5E-4):0.0084):0.00914,(sp1492738:0.00669,sp1306519:0.004):0.00335):0.0046):0.01273):0.00613):0.00362):0.00268):0.00375,((sp468056:0.01361,((sp1131812:0.00409,sp1423323:0.0045):0.00387,((((sp604089:0.00172,(sp69322:7.9E-4,(sp178355:5.5E-4,sp249352:0.0025):5.4E-4):0.00491):0.00199,(sp229205:0.00588,sp271157:0.00723):0.00721):0.00301,sp935223:0.00481):0.00204,sp178356:0.00662):0.00491):0.00965):0.00514,(sp1492737:0.01754,sp1945862:0.00713):0.00758):0.00244):0.0101):0.00865):0.01188):0.00772,sp490189:0.04684):0.01245,((sp1453498:0.0137,sp1752212:0.03257):0.02323,sp1124188:0.04961):0.00901):0.01058):0.0133):0.00717):0.02144):0.00633):0.02306,(sp1121895:0.02358,sp1121898:0.01594):0.02097):0.01242):0.02473):0.07356,(((sp1917170:0.08466,(((((sp49280:0.0184,sp1121912:0.02139):0.03886,((sp1392490:0.0279,(((sp1798225:0.02298,(sp1484460:0.02459,sp325473:0.01668):0.03092):0.00612,(sp1123037:0.02689,sp943936:0.025):0.0112):0.0074,sp1250004:0.0231):0.0146):0.02019,sp1250295:0.0785):0.01378):0.01636,(((sp1089305:0.02256,(sp1936080:0.02744,((sp754409:0.01653,sp391603:0.01399):0.00863,(sp1249933:0.01179,(sp641526:0.0317,sp262004:0.00507):0.01142):0.02915):0.01335):0.01456):0.02537,(sp1645915:0.00967,sp1645914:0.0044):0.03219):0.00795,sp1860095:0.04799):0.00697):0.01757,((((((sp1435349:0.00682,sp1382798:0.01131):0.02694,(sp1936081:0.03202,(sp504487:0.01541,sp419940:0.01254):0.02217):0.00986):0.00842,(sp1380600:0.02095,((((sp1736674:0.02576,sp369401:0.01741):0.00912,(sp221126:0.0219,(sp1336794:0.04716,sp1336795:0.04979):0.0561):0.01068):0.00246,(sp481183:0.02823,sp1849968:0.02085):0.00402):0.02669,(sp870482:0.02028,sp1178825:0.02008):0.00347):0.00365):0.01035):0.00921,sp1454006:0.03837):0.01646,(((sp283786:0.03584,(sp1249999:0.02306,((sp1469557:0.01706,(sp342955:0.01051,sp342954:0.00821):0.00628):0.01551,(sp1486034:0.01132,sp983544:0.01461):0.00994):0.00971):0.01606):0.00996,(sp1122225:0.03959,(sp1144750:0.02016,(sp1353276:0.0154,sp745717:0.01098):0.02561):0.01652):0.01164):0.01725,sp641549:0.04326):0.00636):0.0093,(sp1555194:0.01503,(sp1347342:0.01162,sp225843:0.00944):0.01309):0.02787):0.00815):0.00573,((sp1137281:0.03292,(sp649333:0.00811,(sp1046627:0.03475,sp1861784:0.01004):0.00914):0.02819):0.0119,(sp1197477:0.04659,sp1645916:0.03962):0.01507):0.01395):0.02182):0.02114,(((((((sp1454201:0.02432,(sp1336802:0.01359,sp1453349:0.00579):0.02154):0.03458,sp319236:0.07088):0.03001,sp592029:0.0594):0.01757,sp906888:0.04707):0.09826,((sp313590:0.01028,(sp1239415:0.00326,sp983548:0.00416):0.01423):0.06878,(sp1392489:0.07763,(sp1392488:0.02491,(sp1122159:0.00934,(sp573501:0.00794,sp398720:0.00801):0.01766):0.00809):0.03157):0.03558):0.02218):0.01865,((((sp579105:0.02357,sp1122226:0.01937):0.04658,(((sp1123035:0.01122,((sp1189619:0.00602,sp313595:0.01538):0.04715,sp470826:0.02043):0.00741):0.06736,(sp1155689:0.04707,sp908615:0.06543):0.05232):0.07627,sp216432:0.08927):0.01951):0.01637,(((sp390640:0.02257,(sp1123235:0.01024,sp1123234:0.01368):0.01509):0.01791,(sp865937:0.03134,(sp1336796:0.02648,(sp1167637:0.00914,(sp1283286:0.00736,sp985255:0.00511):0.00715):0.03133):0.00894):0.03058):0.01408,(((sp1930251:0.00403,sp287099:0.00933):0.01464,(sp143223:0.00708,((sp1729720:0.00121,sp447422:0.00525):0.00349,(sp1073325:0.04395,(sp1250278:0.01116,(sp270918:0.00498,sp241145:0.0077):0.00446):0.00271):0.00284):0.01902):0.03529):0.01407,((sp1185767:0.00678,sp1334022:0.01135):0.0401,(sp1229726:0.02492,(sp1913577:0.01281,(sp1121932:0.01665,(sp1250231:0.00533,(sp1250205:0.00808,sp411154:0.00659):0.00642):0.00582):0.01164):0.01599):0.02216):0.0094):0.01883):0.01912):0.01842,(((sp1121006:0.00674,sp1038014:0.0058):0.01794,(sp570521:0.0323,(sp1296415:0.0263,(sp1642818:0.01988,((sp1317122:0.004,(sp1443665:0.01154,sp1443666:0.00274):0.00315):0.01024,(sp1379258:0.01719,sp1121007:0.0251):0.00731):0.00417):0.00449):0.0078):0.00924):0.02648,(sp620914:0.01037,sp980584:0.01023):0.09052):0.02667):0.01178):0.01489,(sp1655592:0.08959,((sp227084:0.03936,sp50743:0.06654):0.01137,((sp1223410:0.0333,sp1763537:0.03838):0.01144,((sp746697:0.01936,(sp1385699:0.00745,(sp171194:0.00252,sp1548749:0.00561):0.00757):0.00689):0.00573,(sp1120951:0.0252,sp797419:0.03575):0.00696):0.0388):0.00752):0.01854):0.03913):0.01831):0.0173,((((((sp1300341:0.0474,sp1004149:0.05956):0.01464,(((sp1055723:0.02982,(sp886377:0.02774,sp1073328:0.02594):0.01062):0.00596,(sp1848189:0.00783,(sp1250232:0.00736,(sp570519:0.01912,sp1547436:0.03037):0.03316):0.0242):0.01331):0.02402,sp516051:0.04445):0.0104):0.02032,((sp400055:0.04922,sp313596:0.03743):0.03069,(sp1848192:0.04617,sp1121875:0.05462):0.01411):0.0161):0.00751,(((sp1453352:0.05643,((sp1249972:0.02631,(sp504486:0.01343,(sp1348584:0.00552,sp688270:0.01558):0.02024):0.01125):0.04485,((sp1121012:0.01406,sp1121011:0.01366):0.04183,(sp558155:0.03805,(sp616991:0.00365,sp188872:0.00275):0.01863):0.00647):0.02003):0.00963):0.00904,(sp76595:0.03578,(sp1888890:5.4E-4,sp979:0.00162):0.00911):0.05147):0.01184,((sp192904:0.04108,((sp143224:0.00975,sp63186:0.00639):0.01555,(sp192903:0.03558,sp641691:0.05154):0.01048):0.02165):0.01173,(sp313603:0.04441,(sp1197874:0.02562,(sp1122191:0.04964,(((((sp1392498:0.0038,sp228959:0.00588):0.00171,sp1644130:0.01196):0.0029,sp228958:0.00796):0.0032,sp440514:0.00635):0.00475,(sp1836467:0.01013,(sp228957:0.00529,sp561365:0.00866):0.00657):0.00402):0.02896):0.01135):0.02202):0.00903):0.02295):0.01408):0.03631,((sp376730:0.05224,(sp555500:0.04102,sp926559:0.02912):0.03183):0.01615,(sp1150368:0.05888,((sp1224947:0.05941,sp946077:0.05035):0.03397,((sp888059:0.01666,(sp553178:0.0205,(sp1227266:0.01323,sp45242:0.01032):0.01267):0.00848):0.07928,(((sp45243:0.04082,((sp1705617:0.00752,(sp1035193:0.00309,sp553177:0.00708):0.0057):0.01525,(sp706436:0.02538,sp1127692:0.03781):0.00671):0.0219):0.02411,(sp28189:0.02644,sp1848903:0.03121):0.00897):0.01525,sp860228:0.03317):0.02576):0.05063):0.01208):0.0105):0.01612):0.01693,(sp1620405:0.0139,(sp391587:0.00894,sp1348245:0.01929):0.01503):0.05684):0.0163):0.01335):0.02496):0.06095):0.04299,(sp926562:0.17771,sp1453500:0.2355):0.05244):0.05664):0.03767):0.04695,(sp929556:0.10906,(((sp1206103:0.05946,(sp762903:0.0466,(sp1122941:0.00475,sp540906:0.00308):0.02601):0.01331):0.04184,(((sp1736286:0.00899,(((sp687842:0.0023,sp1735684:0.00275):0.0031,(sp1270196:0.00712,(sp1736218:0.00572,sp1663685:0.01111):0.00354):0.00274):0.00166,(sp1736297:0.00879,((sp405671:0.00128,(sp332999:0.00278,sp390242:0.00609):0.00315):0.00673,sp947309:0.004):0.00343):0.01935):0.00224):0.01089,sp390241:0.01805):0.02081,((sp1740090:0.00639,sp414048:0.03185):0.02107,(((sp1503925:0.02497,sp188932:0.00424):0.00847,(sp425514:0.00732,sp34086:0.0109):0.00282):0.01351,((sp509635:0.01196,((sp1727164:0.0139,(sp288992:0.00238,sp430522:0.00143):0.00296):0.00497,sp391596:0.00776):0.0034):0.0033,((sp475255:0.01105,sp1761882:0.0069):0.0053,(sp485917:0.00337,sp151894:0.00761):0.00689):0.00408):0.00498):0.01126):0.02207):0.0543):0.01887,(((sp1886027:0.03338,sp714943:0.02595):0.01669,(sp1302689:0.05524,((((sp551995:0.00448,sp551996:0.00237):0.01833,((sp1881048:0.00377,sp354630:0.00231):0.01051,(sp1881049:0.01589,sp1391627:0.00894):0.00501):0.00679):0.01006,(sp652787:0.02586,sp1855297:0.02161):0.01255):0.00829,(sp1895794:0.03226,(sp1300914:0.01538,sp1792845:0.02469):0.01147):0.01126):0.01826):0.0085):0.03472,(((sp1122621:0.05187,(sp743722:0.01656,sp407022:0.02516):0.01759):0.01403,(sp1855384:0.0606,((sp1477437:0.02192,(sp623281:0.02378,(sp623280:0.00903,sp332977:0.0155):0.00676):0.00737):0.02953,(((sp1550091:0.01919,sp525373:0.01065):0.0185,((sp403776:0.00343,sp1538644:0.01832):0.03129,(sp1123265:0.00806,(sp1933220:0.00665,sp1933868:0.00229):0.00733):0.01876):0.01162):0.00674,((sp1010:0.02497,sp1775560:0.05727):0.00819,((sp683125:0.021,(sp1229276:0.0201,sp561061:0.02319):0.00671):0.00997,(sp1513896:0.00793,sp1346330:0.00891):0.02573):0.00586):0.01253):0.03658):0.01465):0.00626):0.0415,((sp1434752:0.00173,sp1150600:0.00572):0.06788,(sp468059:0.03188,(sp572036:0.01637,sp990371:0.01978):0.02579):0.05821):0.01619):0.01004):0.01515):0.0419):0.1223):0.03497):0.03573,(sp1797365:0.40923,((sp452471:0.22755,(sp1231626:0.01924,sp1354314:0.02014):0.35182):0.13229,(((((sp563176:0.12304,(sp929703:0.07107,sp1079859:0.05495):0.07311):0.03519,((sp929562:0.09709,sp649349:0.15529):0.09041,(((sp1166018:0.0306,sp1834519:0.0303):0.05887,(sp1089547:0.08744,(sp1185876:0.03187,((sp1895854:0.00249,(sp1211326:5.4E-4,sp1123277:0.00261):0.00175):0.01891,((sp1123276:0.00439,sp1123278:0.00368):0.01642,((((sp1955701:0.02087,sp1178516:0.03395):0.01286,sp564064:0.02563):0.01003,sp1379870:0.01292):0.02416,(sp504472:0.00777,sp662367:0.01616):0.0034):0.00429):0.01632):0.02814):0.01928):0.0263):0.06512,((sp761193:0.02285,(sp1123078:0.02062,sp1123077:0.03359):0.01452):0.09572,(sp408657:0.0297,(((((sp1895756:0.00356,sp471854:0.0058):0.00379,sp659014:0.00218):0.00309,sp1855291:0.00225):0.01936,((sp1121483:0.0036,sp1736295:0.00276):0.01487,(sp1121481:0.00477,sp651661:0.00465):0.01543):0.00811):0.03412,sp1434325:0.0432):0.00883):0.09496):0.02853):0.02373):0.01647):0.0574,(sp1664068:0.15483,sp1313301:0.20684):0.04746):0.01714,(sp1905359:0.16464,sp1121902:0.14749):0.05914):0.02019,(((((sp1124780:0.11442,(sp1279009:0.04664,sp1257021:0.04363):0.08103):0.05897,(((((sp1239962:0.06775,sp758820:0.03157):0.00984,sp1189612:0.03439):0.01529,((sp866536:0.02573,sp529505:0.01654):0.01764,sp336829:0.0591):0.00622):0.01274,(((sp1120966:0.00152,sp1305737:0.0031):0.04311,((sp435880:0.01587,sp686796:0.01319):0.01258,(sp226506:0.01353,(sp1073327:0.01182,sp1120968:0.01278):0.01341):0.00769):0.006):0.01341,((sp1727163:0.02867,(sp1120965:0.01504,((sp1945863:0.00754,sp1120967:0.01631):0.00568,(sp279824:0.01259,sp1120964:0.01908):0.01092):0.01553):0.00705):0.01902,((sp226505:0.01586,sp388413:0.02512):0.01875,(sp1925762:0.02814,(sp237018:0.01651,(sp305507:0.006,sp1750590:0.00698):0.00497):0.02242):0.01403):0.00989):0.00774):0.03999):0.01149,((sp1048983:0.05709,(sp926556:0.0298,sp1121859:0.03108):0.03551):0.00756,(sp1232681:0.05776,((sp880070:0.01185,(sp320787:0.00318,sp641524:0.01468):0.01198):0.02635,(sp1416801:0.0303,sp388280:0.02605):0.01151):0.04332):0.0259):0.00958):0.10424):0.01719,(((((sp296218:0.01233,(sp1914963:0.00332,sp279360:0.00155):0.00685):0.08065,(sp1267423:0.04714,(sp1889784:0.06958,sp333140:0.05533):0.01497):0.03053):0.06029,(sp156994:0.06432,sp692418:0.05721):0.09283):0.01899,((sp643867:0.00451,sp1028:0.01012):0.15321,((sp1852619:0.06138,sp1237149:0.05847):0.0482,(sp947013:0.05423,sp688867:0.04822):0.15366):0.02453):0.01614):0.0154,sp1561025:0.17699):0.0186):0.02764,((sp1003:0.18553,(sp1121903:0.15135,sp880071:0.1583):0.10944):0.03445,(sp1121904:0.13695,(sp1775430:0.02137,(sp915059:0.01149,sp1191459:0.00746):0.01865):0.18127):0.05402):0.02264):0.01768,((((sp926565:0.00727,sp153721:0.00842):0.11957,(sp269798:0.01367,sp1121373:0.0141):0.15963):0.05536,(sp1075417:0.14768,sp927664:0.13533):0.03325):0.01345,(((((sp1121955:0.03235,sp645990:0.03734):0.01357,((((sp1121959:0.01155,sp1356852:0.01277):0.00696,((sp1227739:0.01227,(sp1121953:0.01034,(sp651662:0.00778,sp82805:0.00269):0.00388):0.03424):0.01163,sp1571877:0.02062):0.00856):0.0111,sp1121957:0.0261):0.01379,sp1385663:0.07201):0.01055):0.00916,(sp1484116:0.06064,(sp1629124:0.00931,(sp1227077:0.00809,sp1505605:0.01668):0.00678):0.03683):0.03908):0.03436,(sp1955620:0.06996,sp1751427:0.01523):0.05796):0.06771,(sp926549:0.08005,(((sp1077936:0.01113,sp1317125:0.01441):0.02941,((sp388950:0.0412,sp1797110:0.01718):0.00747,(sp400092:0.0101,sp1436961:0.04611):0.00506):0.03048):0.05827,(sp1379909:0.02934,(sp1567108:0.02302,(sp1379910:0.0196,sp512763:0.01677):0.014):0.01686):0.06616):0.01797):0.02237):0.10027):0.0223):0.0161):0.04784):0.03939):0.02037):0.21159,((sp1666909:0.22102,(sp1194090:0.17369,((sp1812810:0.02169,sp1729466:0.02894):0.11692,(sp1121930:0.08215,(sp1849360:0.05,sp1121104:0.04452):0.06524):0.07074):0.04301):0.08834):0.13173,((sp633813:0.017,sp518766:0.02319):0.15733,(sp1729468:0.18705,(sp1089550:0.10969,sp309807:0.15622):0.12878):0.05957):0.13895):0.06259):0.0718):0.03155,((sp1617411:0.35516,((sp1191523:0.08632,sp1798453:0.16095):0.076,(sp1805221:0.14575,(sp945713:0.10052,(sp1798454:0.16252,sp1961105:0.1061):0.04868):0.01932):0.07298):0.10834):0.06212,((sp1643428:0.02865,(sp1643429:0.02209,sp1633631:0.0237):0.01154):0.26864,(sp1619898:0.30878,(sp1662223:0.21884,(sp1798452:0.25954,sp1895771:0.23218):0.05542):0.12437):0.10329):0.05502):0.0366):0.08346,(sp880073:0.30323,(sp1805240:0.34146,(sp939857:0.43966,sp1781246:0.23949):0.16466):0.11925):0.05056):0.05989):0.02933):0.04492):0.04084):0.02185):0.02462,((((sp1935108:0.19579,sp1935110:0.22307):0.23501,(sp1797171:0.41799,(((sp454194:0.13392,((sp1962177:0.09121,(sp1752182:0.09452,(sp1617423:0.08685,sp1752184:0.08548):0.02679):0.04455):0.12668,sp1803431:0.1174):0.04502):0.21819,(((((sp204669:0.16287,(((sp401053:0.06548,(sp926566:0.03068,(sp392734:0.00558,sp278961:0.03221):0.02987):0.06628):0.05865,(sp682795:0.07631,(((sp278963:0.02192,sp639030:0.02982):0.04154,(sp1895690:0.02924,sp1267534:0.041):0.01044):0.01644,(sp474950:0.0639,sp1198114:0.06797):0.01855):0.02384):0.03929):0.05584,((sp1577687:0.04553,sp1380348:0.06396):0.0811,(sp1267533:0.09137,(sp1382359:0.07706,(sp240015:0.05987,sp1577686:0.06526):0.01516):0.01759):0.02649):0.01645):0.08177):0.12812,(sp234267:0.16133,(sp1267535:0.13777,sp1340493:0.20958):0.06635):0.12564):0.02967,sp1797186:0.33493):0.02713,sp1803466:0.37865):0.04878,sp1803458:0.28327):0.05867):0.06219,((sp1797182:0.16645,sp1813736:0.15554):0.19596,(sp1121920:0.07459,sp903818:0.08766):0.36972):0.03237):0.0404):0.04613):0.08873,((((sp1805367:0.36982,(sp1640516:0.23439,sp671143:0.25221):0.12872):0.05629,(sp1499966:0.159,sp1499967:0.11642):0.24475):0.03051,(sp1817883:0.40972,(sp1801689:0.3125,(sp1266370:0.15889,sp1671875:0.19572):0.22623):0.0637):0.06011):0.02553,((sp1801697:0.31927,(((sp1658518:0.00456,sp330214:0.00587):0.10125,(sp1325564:0.07061,(sp1978765:0.07249,(sp42253:0.03196,(sp1715989:0.12825,sp1752217:0.05933):0.01788):0.02311):0.03004):0.04667):0.26053,sp1162668:0.49095):0.07084):0.049,(sp1935149:0.2533,((sp1801691:0.24429,(sp86166:0.04226,(sp1123376:0.08572,sp289376:0.0438):0.02577):0.23372):0.06135,((sp1935147:0.15559,(sp1801702:0.1867,(sp1802373:0.09131,sp1801703:0.12515):0.08712):0.05151):0.04206,(sp1935142:0.28142,(sp1935146:0.20325,(sp1455061:0.17017,sp1748249:0.15065):0.15249):0.03506):0.02717):0.0262):0.0434):0.14689):0.06423):0.02321):0.02109,((((sp156889:0.34086,((sp744985:0.57703,((sp1002672:0.17397,sp684719:0.15804):0.19563,(sp1144932:0.24088,(sp198252:0.05787,(sp1977865:0.09984,(sp335992:0.08178,((sp1388755:0.03061,(sp1977864:0.05251,sp859653:0.04683):0.01947):0.012,(sp1096769:0.03154,((sp1400524:0.0064,sp1400525:0.00725):0.01169,(sp1265756:0.00789,sp466038:0.01143):0.01413):0.02215):0.01375):0.02674):0.06475):0.09252):0.1677):0.11413):0.21822):0.14698,(((sp1797217:0.36629,((sp1895707:0.28038,(sp1629334:0.17206,(sp1895736:0.02692,sp1895735:0.02801):0.11613):0.12475):0.03276,((sp985867:0.14825,sp244582:0.13708):0.15851,sp1895706:0.25392):0.02983):0.02094):0.033,(((sp349215:0.00239,sp856793:0.0012):0.18937,(sp1803508:0.07299,sp1797220:0.09687):0.14659):0.14491,(((((((sp1852621:0.11426,(sp1122135:0.03948,(sp1549748:0.00473,(sp1489064:0.00271,sp1936025:0.00435):0.00476):0.03933):0.11368):0.03681,((sp1089552:0.13884,sp1082479:0.16552):0.112,(sp560819:0.11744,(sp570952:0.00769,sp570967:0.00841):0.14268):0.05238):0.02535):0.04084,((sp1122607:0.13013,(sp331869:0.08709,((sp1401328:0.0593,sp1193729:0.04703):0.16033,sp1123362:0.02361):0.05704):0.05871):0.03112,(sp1009708:0.30898,(sp488538:0.0945,sp909943:0.11898):0.07149):0.09235):0.04411):0.01915,(sp1207063:0.00951,sp1909734:0.01394):0.16474):0.02499,(((sp1380394:0.1575,sp1380391:0.18251):0.02968,(sp1797213:0.26415,(sp1122125:0.13851,((sp1121033:0.05093,(sp192:0.03191,(sp193:0.01918,(sp286727:0.00982,sp528244:0.01278):0.01337):0.02517):0.0308):0.04651,(sp414684:0.0543,(sp1121034:0.02225,sp1523418:0.03549):0.0592):0.05165):0.03512):0.01992):0.02809):0.01504,(((sp1437059:0.04169,(sp1895778:0.01889,sp1430440:0.0197):0.02988):0.04712,((sp1150626:0.0037,(sp1082:0.00277,sp1316936:0.00229):0.00196):0.05057,(sp1285242:0.03502,(sp1244869:0.00715,(sp342108:0.00554,((sp1639348:0.00288,sp1663591:0.00218):0.00759,sp272627:0.00843):0.00251):0.00565):0.03007):0.01775):0.03308):0.09249,((sp225324:0.02525,(sp1205680:0.02775,sp1380357:0.03101):0.01869):0.21663,(sp1121861:0.1135,((((sp364410:0.07431,((sp1208583:0.01947,sp1088868:0.01615):0.11422,(((sp1231623:0.05213,(sp320497:0.02424,((sp1236500:0.00779,(sp1236525:0.008,(sp1236502:0.00286,sp1231624:0.00733):0.00242):0.00537):0.03314,sp153496:0.01905):0.01163):0.01471):0.01073,((sp1223520:0.03318,((sp442:0.00436,sp376620:0.00377):0.01085,((sp318683:0.00549,(sp290633:0.00162,sp586239:0.0032):0.00173):0.01615,sp1088869:0.02089):0.00697):0.00798):0.01634,(sp1123227:0.03723,sp1510841:0.03522):0.05862):0.01833):0.04361,(((sp1120919:0.0275,(sp435:0.00775,sp887700:0.00528):0.03003):0.02057,(((sp1231341:0.00674,sp1231339:0.01538):0.00779,(sp1231340:0.01482,(sp178901:0.00449,(sp104099:0.00725,sp1076596:0.00576):0.00333):0.02427):0.00509):0.01449,((((sp1633874:0.00175,sp481146:0.00511):0.00179,sp438:8.0E-4):0.00155,sp1457393:0.00149):0.02245,(sp1234671:0.02579,(sp431306:0.00345,(sp1236501:0.00979,sp1231343:0.00252):0.00168):0.02175):0.01406):0.02063):0.03593):0.01742,(sp272568:0.03261,(sp28448:0.02596,((((sp940286:0.00261,sp33995:0.04139):0.0018,sp1296990:0.00219):0.00544,(sp1004836:0.00626,sp634177:0.00649):0.00511):0.00385,(sp1220579:0.00362,sp265960:0.00193):0.00764):0.01497):0.02754):0.01993):0.01038):0.01951):0.04314):0.02255,sp1895826:0.08627):0.01814,((sp1120923:0.01703,sp1214225:0.02347):0.07647,(sp349163:0.03539,sp526:0.05781):0.05602):0.04469):0.03815,(sp1123072:0.08552,((sp1054213:0.069,(sp257708:0.0629,(sp1123060:0.03056,sp198092:0.02326):0.04852):0.01873):0.01774,(sp1123062:0.07742,(sp938405:0.00939,(sp1121106:0.00362,sp1545443:0.00578):0.00852):0.06484):0.01136):0.02122):0.04667):0.04748):0.09704):0.03841):0.01958):0.02442):0.01444,(((sp1288970:0.13842,sp1655503:0.19479):0.04181,((sp1123355:0.05642,sp1867952:0.03198):0.15433,((sp1544451:0.01008,(sp1470575:0.00403,sp1293891:0.01007):0.01025):0.02933,((sp1293890:0.02527,(sp168935:0.00277,sp1123366:0.00465):0.00792):0.0078,(sp1123365:0.01854,(sp1528106:0.00992,(sp501834:0.00639,(sp1616823:0.004,sp502049:0.00451):0.00337):0.00612):0.01043):0.01401):0.01526):0.15191):0.03242):0.03073,(((sp69960:0.13021,(sp1150469:0.07678,sp269796:0.0733):0.05983):0.03461,(sp83401:0.16797,(sp1238182:0.11878,(sp80876:0.10832,(sp1279038:0.06291,sp1549855:0.09782):0.04334):0.0383):0.02071):0.01792):0.04107,(sp1896965:0.09027,(sp1638782:0.05034,(sp1262987:0.06858,sp1896972:0.0913):0.01394):0.03408):0.23999):0.03307):0.02955):0.01865,(((((sp1662421:0.00769,sp637679:0.00923):0.15898,(sp1234595:0.14653,((sp1523432:0.07416,(sp1985171:0.02693,(sp1123240:0.01992,sp1248916:0.0075):0.02168):0.04585):0.09951,(((sp941907:0.0667,(sp1123267:0.04897,sp1380389:0.07333):0.0404):0.0294,(((sp1219043:0.06608,sp1123269:0.06196):0.01133,(((((sp160791:0.00214,sp1882773:0.00724):0.04357,((sp133190:0.0221,sp1736594:0.01014):0.00852,(sp1666951:0.02125,((sp334801:0.00256,sp439228:0.002):0.02185,sp1736595:0.013):0.00606):0.00819):0.02642):0.02894,(sp745310:0.02684,sp1030157:0.0278):0.02379):0.00863,((sp1843236:0.07394,sp1166337:0.05765):0.01498,(sp627343:0.02312,sp579138:0.02211):0.10486):0.00703):0.01689,sp685778:0.07799):0.02589):0.00991,((((((sp1735676:0.00316,(sp1736369:0.01374,(sp1735690:5.5E-4,sp1736230:5.4E-4):0.00315):0.00444):0.00811,(sp1735689:0.00503,sp1736214:0.00354):0.00367):0.00414,sp563996:0.0025):0.04981,(sp1768741:0.04551,((sp194867:0.01139,(((sp453247:7.5E-4,(sp1566283:0.00244,sp1219051:0.00732):0.00564):0.00545,sp1219041:0.0026):0.00179,sp1081640:0.00395):0.01308):0.02626,(sp1985172:0.04048,((sp1938607:0.03426,(sp1449076:0.00646,sp1736501:0.00158):0.00732):0.01609,(sp1609977:0.03592,sp1219055:0.03307):0.00852):0.0129):0.01538):0.0146):0.00822):0.00756,(sp1550073:0.06666,(sp1888892:0.02045,sp93064:0.04871):0.03426):0.0183):0.01148,((((sp1566282:0.00505,sp1560345:0.01009):0.02684,((sp1381597:0.03222,sp1736350:0.0271):0.01505,(sp1112216:0.02314,(sp1112214:0.02384,(sp1112212:0.00153,sp1564113:0.00126):0.01101):0.00877):0.01765):0.0109):0.02399,(sp1827383:0.06138,(sp1768757:0.0312,(sp1978762:0.03819,(sp1752232:0.00106,sp1978761:5.4E-4):0.00552):0.03378):0.0117):0.02118):0.02054,(((((sp621456:0.01737,(sp1470591:0.00699,sp1549858:0.00722):0.01305):0.02053,((sp1735683:0.03374,(sp1735685:0.00294,(sp1736213:0.00496,(sp1735695:0.00384,(sp1736299:5.5E-4,(sp1881067:0.00102,sp1735679:0.00102):5.5E-4):0.00462):0.00516):0.0029):0.02934):0.02972,(sp1736345:0.02122,(sp634430:0.03485,sp1736343:0.02842):0.00706):0.01658):0.01163):0.01233,(sp1166340:0.05033,(((sp33053:0.01866,(sp1090319:0.00931,(sp1090318:0.00655,sp1736301:0.01556):0.01):0.01416):0.01614,((sp1855283:0.00395,sp629773:0.00446):0.0307,sp1736370:0.04028):0.00919):0.0093,(sp1895849:0.03841,(sp1642949:0.01222,(sp1881068:0.01301,sp1915074:0.01827):0.00624):0.02473):0.01375):0.01256):0.01079):0.00882,(sp1628084:8.2E-4,(sp1390395:0.00101,sp33051:0.00203):0.00124):0.04391):0.01287,((sp1219052:0.00333,(sp1219048:0.00215,sp1219040:0.00645):0.0029):0.04801,sp1736215:0.06149):0.0101):0.01009):0.00891):0.03325):0.01471):0.01586,((((sp1123270:0.10259,(sp1123272:0.03139,(sp1849171:0.03146,sp1806885:0.03101):0.02314):0.09189):0.02903,((sp47920:9.9E-4,sp1802169:5.5E-4):0.01303,(sp1545915:0.0032,(sp1842535:0.01503,sp1248760:0.00395):0.00523):0.015):0.07384):0.01548,(((sp1420591:0.05595,((sp1096930:0.02626,(sp555793:0.03592,(sp158500:0.02374,(sp1735670:0.01815,(sp1144305:0.0124,(sp1114963:8.1E-4,sp1609758:0.00175):0.02229):0.01288):0.01084):0.00844):0.01062):0.00891,(sp1884364:0.02688,(sp1219034:0.02007,(sp1348853:0.02103,(sp1088721:0.00641,sp428990:0.00786):0.01561):0.01227):0.01308):0.00751):0.0133):0.02345,((sp1219053:0.04225,sp1895900:0.04738):0.03379,(((sp1523413:0.02803,(sp983920:0.02317,(sp1739114:0.02107,(sp1739113:0.01507,sp1122612:0.01762):0.01393):0.01778):0.01996):0.01447,(sp1660121:0.03057,(sp1523425:0.03886,(sp279238:0.01446,(sp48936:0.0037,sp1938756:0.0079):0.01012):0.00725):0.01948):0.00794):0.00466,((sp1117702:0.00742,(sp1523427:5.5E-4,sp1892847:0.0021):0.00671):0.03536,sp1219033:0.06751):0.01521):0.01911):0.02561):0.02142,((sp1603897:0.06804,(((sp1267766:0.03935,(sp1736584:0.06707,(sp1572751:0.05642,sp1844758:0.05754):0.02137):0.01585):0.0131,(((((((sp361183:0.04468,(((sp39960:0.01805,sp1798193:0.01201):0.02312,((sp1300349:0.01329,(sp1479239:0.01292,sp198312:0.01478):0.0167):0.00702,(((sp1768805:0.01233,(sp1112:0.01946,sp1523423:0.02028):0.01281):0.00526,(sp1896196:0.01195,(sp1248917:0.01216,sp1768763:0.00663):0.01067):0.00731):0.00818,sp1122970:0.04432):0.01132):0.04603):0.01004,(sp1735012:0.02504,sp1044:0.04845):0.02474):0.01445):0.01175,(sp314225:0.05267,(sp1634516:0.01657,sp517722:0.02073):0.03823):0.01369):0.00514,((sp604088:0.01436,(sp291985:0.01464,sp161528:0.01148):0.01134):0.02024,(sp499656:0.01248,(sp1849358:0.04437,sp1306953:0.02095):0.00631):0.02457):0.02572):0.00672,sp1860125:0.08093):0.00983,sp543877:0.04343):0.01113,(sp645517:0.06038,(sp1581420:0.05709,(sp502682:0.03287,(sp1648404:0.03618,sp874156:0.05116):0.01834):0.01347):0.03537):0.01509):0.01499,(sp292222:0.01819,sp692370:0.02031):0.04971):0.01361):0.01394,((sp1348774:0.0173,(sp1703341:0.01173,sp1783232:0.01866):0.00981):0.03016,(sp450378:0.0256,sp1703339:0.01915):0.02975):0.03484):0.01266):0.01062,(sp1219035:0.0296,sp1172626:0.03358):0.03251):0.02511):0.04653):0.0242,(((sp1895845:0.03309,sp627192:0.02664):0.02606,(sp1592790:0.03757,((((((sp1768781:0.0083,sp1223534:0.01312):0.00537,(sp1207055:0.01932,(sp1219036:0.00276,sp314266:0.0036):0.01071):0.00566):0.00352,(sp453246:0.01314,(((sp1420583:0.01018,((sp1192759:0.007,sp1301087:0.0052):0.01522,(sp1461752:0.02183,sp1843368:0.00103):0.01665):0.01128):0.01501,(sp1735693:0.01298,(sp1884365:0.0023,sp1884369:0.0025):0.01492):0.0075):0.00744,(sp1144307:0.01164,sp13690:0.00963):0.00841):0.01141):0.00358):0.00661,(((((sp484429:0.00531,sp861109:0.00304):0.00472,(sp1335760:0.00868,sp13689:0.00811):0.0037):0.00222,(sp56193:0.0074,(sp46429:0.00252,sp690566:0.00229):0.00612):0.00224):0.00398,sp1315974:0.01094):0.00372,(sp1855519:0.00729,(sp407020:0.004,sp76947:0.0016):0.01123):0.00606):0.00581):0.00661,(sp1223531:0.0096,(sp1332080:0.01418,sp570446:0.01221):0.00643):0.00915):0.00736,sp1346791:0.02123):0.0208):0.02216):0.03902,(((sp267128:0.02174,sp1219058:0.01766):0.00721,((sp1507287:0.00318,sp292913:0.00334):0.01001,(sp317655:0.01144,(((sp33050:0.0067,((((((sp1502850:0.00232,sp1515612:0.00524):0.00155,sp1759067:8.7E-4):0.00189,sp1736476:0.00145):0.00744,(sp1881047:0.00497,sp262667:0.00346):0.00253):0.00369,sp1802172:0.0351):0.00662,(sp1759074:0.0058,(sp1357916:0.00367,sp1736474:0.02007):0.00404):0.00996):0.00317):0.00172,(sp1759072:0.00763,sp1759079:0.01296):0.00515):0.00595,(sp1759073:0.00667,sp1120705:0.00873):0.00575):0.00597):0.00771):0.00485):0.01164,sp1537715:0.02304):0.07904):0.01953):0.02222):0.04824):0.02725):0.12637):0.05476,((sp1122218:0.20303,((sp89524:0.13714,(sp1234555:0.07333,(sp1114924:0.05211,sp356660:0.05928):0.04895):0.0271):0.02418,((sp1892596:0.06262,sp367336:0.11595):0.05067,((((sp1666916:0.04245,sp1786003:0.06765):0.02931,(sp564137:0.06735,(sp1666912:0.0377,(sp87172:0.03089,(sp121821:0.01418,sp441209:0.00724):0.02116):0.01833):0.03556):0.02581):0.02289,((((sp1335048:0.07147,((sp1121271:0.0172,sp1086013:0.01973):0.05701,(sp1884310:0.0913,(((sp933059:0.02475,(sp1895824:0.03332,sp1802013:0.0278):0.01164):0.02065,((sp371731:0.04289,(sp1678131:0.03754,sp1802014:0.02193):0.03157):0.01772,(sp687412:0.03074,(sp1120568:0.01125,(sp77008:0.01087,sp1077947:0.02488):0.01142):0.00996):0.04333):0.01026):0.01127,(sp1063:0.04118,sp1472418:0.06701):0.01493):0.01103):0.02178):0.01537):0.01372,((sp407234:0.05196,((sp1889770:0.062,(((sp1915077:0.0045,sp1353537:0.00556):0.0103,(sp1317124:0.01617,sp1915316:0.02396):0.00711):0.0138,(sp1353528:0.02769,sp1185766:0.02127):0.01814):0.02286):0.0357,((sp453582:0.02465,(sp1061:0.00647,sp272942:0.00292):0.03415):0.01859,((sp1674810:0.01772,sp1105367:0.05178):0.01307,sp1850250:0.02871):0.01078):0.02015):0.01488):0.01046,((sp591205:0.04821,(sp405559:0.04273,((sp364199:0.02153,sp1266998:0.03039):0.01054,(sp34002:0.03139,(sp336292:0.01917,(sp1192054:0.00495,sp1569209:0.00635):0.02524):0.02137):0.00731):0.00497):0.01399):0.01669,((sp1367847:0.05064,(((sp935848:0.00851,sp935850:0.03319):0.00464,(sp82367:0.00585,(sp1745182:0.00282,sp318586:0.00856):0.00476):0.00418):0.00723,(sp376733:0.03308,(sp147645:0.01808,sp34004:0.01169):0.01086):0.00299):0.00792):0.01043,((sp65735:0.01454,sp53463:0.00609):0.02971,(sp525640:0.02571,(sp1945662:0.02715,(sp690417:0.01607,sp1545044:0.01403):0.00908):0.00847):0.01198):0.03506):0.0131):0.03774):0.0139):0.01156,sp195105:0.06561):0.01869,sp765699:0.06109):0.01358):0.02975,(((sp35806:0.00871,sp308754:0.01227):0.03817,(sp1882821:0.04548,sp1564506:0.03164):0.01367):0.02408,(((((sp1231392:0.06858,(sp313368:0.04208,(sp1530186:0.04202,sp315423:0.05193):0.03342):0.01136):0.02047,(sp441119:0.04006,sp641238:0.07938):0.01813):0.03093,(sp1933035:0.09424,sp1411903:0.06062):0.01444):0.00677,((((sp1912092:0.02309,sp1287720:0.02896):0.02818,((sp290400:0.01108,sp1849359:0.01682):0.0665,(sp1294273:0.02963,sp1666917:0.04899):0.01654):0.02208):0.02867,(((((((sp657014:0.05624,(sp340021:0.041,sp53501:0.03082):0.01834):0.01335,(((sp1122614:0.05513,(sp1461694:0.02702,(sp252305:0.02135,sp517719:0.03076):0.01318):0.02509):0.02363,(((sp1387277:0.05091,sp1618204:0.06402):0.02025,((sp1317121:0.0586,sp988812:0.05483):0.01332,((sp996342:0.02452,(sp1123756:0.00735,sp505252:0.03315):0.01193):0.02141,(((sp93684:0.03619,sp633194:0.03068):0.01973,(sp1449351:0.03909,(sp1449350:0.03823,sp1317118:0.02808):0.01983):0.02329):0.02211,(((sp555512:0.04473,(sp1792508:0.00979,sp311180:0.01047):0.01403):0.01249,(sp766499:0.04237,((sp1250539:0.01658,(sp1229727:0.0207,sp1123237:0.03825):0.01445):0.00562,(sp282683:0.02603,sp314265:0.01865):0.00511):0.00356):0.0093):0.01475,((sp441103:0.04163,(sp1685382:0.03367,sp561184:0.03353):0.01231):0.00775,sp321339:0.07081):0.01577):0.01378):0.01478):0.00865):0.00822):0.00968,((sp337701:0.02691,sp351016:0.03773):0.02195,((sp89187:0.03503,(sp573024:0.05498,((sp1054996:0.00734,sp1005928:0.00559):0.0234,((sp74031:0.00786,sp1570360:0.0105):0.02446,(sp1287727:0.02511,((sp1288298:0.00466,sp215743:0.00576):0.01033,(sp314264:0.01042,sp1354722:0.01126):0.00402):0.01419):0.01377):0.01409):0.01709):0.0161):0.01014,(sp1641875:0.04332,sp540747:0.04732):0.01517):0.00674):0.0235):0.00827):0.00582,((sp490829:0.02476,sp1305735:0.04431):0.02191,(sp1666914:0.05362,(sp569882:0.06262,sp1123247:0.06189):0.01504):0.01073):0.00808):0.01048):0.00612,((sp393278:0.07589,(sp1366046:0.05154,sp1689867:0.06626):0.02655):0.01076,(sp871652:0.03286,sp871651:0.03865):0.02711):0.00585):0.00563,((sp576131:0.06315,(sp1481893:0.01984,(sp314270:0.01458,sp696762:0.01362):0.0111):0.05315):0.01548,((sp515897:0.10241,sp999627:0.0398):0.01618,((sp1402135:0.03981,(sp299262:0.01532,sp1577905:0.01467):0.02795):0.01795,((sp391595:0.01056,sp375451:0.00615):0.02698,((sp1443111:0.03306,sp1300350:0.01516):0.03127,(((sp335975:0.00564,sp60137:0.00657):0.00881,(sp391589:0.01215,sp394264:0.00975):0.00541):0.02077,(((sp1342299:0.02003,(sp1342301:0.01129,sp1342302:0.01524):0.0094):0.01183,(sp83219:0.02471,sp1849168:0.02114):0.00656):0.00572,(sp74348:0.03238,(sp218672:0.00346,(sp391624:0.00632,sp218673:0.00302):0.00288):0.0278):0.01036):0.00606):0.00867):0.01216):0.02246):0.01395):0.01263):0.01402):0.0053,(((((sp246200:0.0141,sp639004:0.01981):0.03084,sp1121479:0.04607):0.01252,((sp1227549:0.04866,((sp1577904:0.00813,((sp981384:0.00343,((sp467661:0.00833,(sp1715692:0.00286,(sp1225660:0.00951,(sp81569:0.00618,sp985054:0.01508):0.00754):0.0044):0.00231):0.00177,sp1577903:0.00473):0.00239):0.00441,sp1685378:0.00637):0.00385):0.01666,(sp644107:0.01016,sp1685379:0.01544):0.00806):0.01373):0.0072,((((((sp999549:0.00621,(sp1396826:0.00533,sp999547:0.0045):0.00729):0.00425,((sp1855282:0.00266,(sp1002340:0.00141,sp1577902:0.00187):0.002):0.00499,(sp999611:0.01696,sp1868286:0.01529):0.00903):0.00299):0.00536,(sp1577895:0.00258,sp1577896:0.00324):0.00991):0.01568,(sp60890:0.02834,(sp1712645:0.01318,(sp1144477:0.0194,(sp999550:0.01472,(sp1225647:0.00838,sp314262:0.00526):0.00337):0.00772):0.0055):0.03096):0.00887):0.00506,((sp1156985:0.04199,sp928856:0.02945):0.01417,((sp1768241:0.01307,sp1860092:0.01048):0.01853,(sp292414:0.00214,sp1265309:0.05013):0.01221):0.0145):0.00645):0.00594,(sp481446:0.01098,(sp1844006:0.0139,(sp221822:9.0E-4,(sp1423144:0.00148,sp1569353:5.7E-4):0.00284):0.00363):0.01545):0.01244):0.01858):0.00573):0.01061,sp1470562:0.04319):0.0101,((sp154981:0.03046,sp1173584:0.03719):0.02887,((sp870908:0.01492,sp1715691:0.01928):0.03493,((sp254406:0.0284,(sp321267:0.01549,(sp1280847:0.01113,sp1389006:0.02179):0.01277):0.0118):0.00778,(sp1470563:0.04223,sp1715693:0.02709):0.01663):0.01276):0.0185):0.01209):0.00642):0.0134,((((((sp633131:0.04894,(sp1458307:0.02912,(sp391616:0.00881,sp391626:0.02821):0.02852):0.04479):0.02449,(((((sp1881056:0.00139,sp1225657:5.4E-4):0.03874,(sp195913:0.01869,(sp366533:0.0101,sp245187:0.02123):0.00597):0.02536):0.03652,(((sp1122181:0.0052,sp314232:0.01221):0.03607,((sp390270:0.02273,sp579483:0.01928):0.01297,((sp1225655:0.00366,(sp1700845:5.5E-4,sp287098:5.5E-4):0.00343):0.02228,sp1123755:0.03231):0.00774):0.00951):0.01702,(sp1508389:0.05041,sp364200:0.03573):0.01906):0.01589):0.0317,(((sp1123501:0.04688,sp1447782:0.04825):0.034,((sp521013:0.0465,(sp1337093:0.02839,sp1122180:0.00965):0.01176):0.03498,(sp442562:0.09182,(sp92945:0.01329,sp92947:0.01156):0.06535):0.02668):0.00861):0.0168,sp1920883:0.05647):0.01531):0.01362,((sp1666913:0.03329,sp1914408:0.09589):0.01951,sp314256:0.06015):0.01248):0.01142):0.01674,(sp282199:0.06744,(sp1123360:0.015,(sp670154:0.00954,(sp1486859:0.01173,sp670155:0.01707):0.01127):0.00678):0.06246):0.01642):0.00644,((sp266809:0.05442,(sp935700:0.06382,(sp313367:0.06641,((sp1244108:0.01974,(sp420998:0.0255,sp188906:0.04601):0.02387):0.01545,(sp390807:0.03327,sp282197:0.048):0.01178):0.01629):0.01992):0.02729):0.02685,sp398580:0.06614):0.00962):0.00568,(sp666509:0.0852,(sp1579316:0.08241,sp1290553:0.06513):0.02149):0.01611):0.00747,(sp658057:0.09883,(sp1397108:0.07043,((sp1208323:0.00118,sp875171:8.5E-4):0.03271,((sp588602:0.02046,(sp1758178:0.01991,sp1208324:0.03145):0.01418):0.01042,sp576117:0.01995):0.01843):0.00789):0.01298):0.04262):0.00911):0.00677,(sp314271:0.04934,sp1162418:0.06024):0.02971):0.00536):0.0073,((sp1675527:0.07984,(sp1217970:0.06156,((sp571298:0.00779,sp1510458:0.01422):0.02531,(sp441112:0.03029,sp1739787:0.01707):0.01228):0.0438):0.01648):0.00791,(sp1415756:0.04621,(sp1461693:0.05591,sp1609966:0.05084):0.01294):0.0108):0.0067):0.00968):0.00683,sp990712:0.10232):0.00834):0.01276):0.02629):0.04987):0.06156):0.08309,((((((sp1122213:0.09459,sp422296:0.08497):0.0265,((sp1082931:0.01718,sp440168:0.02047):0.07329,((sp665118:0.05555,((sp1736675:0.00384,(sp1736531:0.00679,sp1895752:0.00274):0.00487):0.04576,(sp1895754:0.03902,sp1895753:0.04204):0.03919):0.02739):0.02519,((sp1535287:0.0169,sp1643450:0.0159):0.04618,(sp443610:0.04691,(((((sp1121477:0.02887,sp1293439:0.01288):0.00966,sp1502724:0.01504):0.00742,(sp1881030:0.00459,sp728005:0.02095):0.01336):0.00761,(sp1736537:0.00282,sp1736575:0.006):0.01007):0.02121,(sp1660125:0.01895,(((sp429728:0.01563,(sp1736374:0.01107,sp1736587:0.01902):0.00962):0.01385,sp1895751:0.01677):0.00816,sp429727:0.01603):0.01486):0.02287):0.02255):0.02842):0.00992):0.06413):0.03242):0.09496,((((sp1380380:0.01168,sp1514904:0.01355):0.10775,sp744979:0.19046):0.04026,((sp1881059:0.06814,(((sp182270:0.04734,(sp1317114:0.05109,(sp217511:0.06592,sp937218:0.03154):0.02919):0.01321):0.01113,sp1736378:0.04579):0.01896,((sp1736375:0.00919,sp1736381:0.00977):0.06173,((sp424757:0.02181,sp370622:0.02036):0.03597,((sp401562:0.01223,(sp1349819:0.01552,sp1121028:0.00807):0.0083):0.02013,(((sp1638163:0.00793,sp1166073:0.00781):0.02687,(sp1638162:0.00957,(sp1166078:0.00158,sp1736336:0.00244):0.00563):0.02394):0.00877,sp1638161:0.03769):0.00631):0.02409):0.01794):0.01244):0.0128):0.05279,((((sp1273132:0.13643,(sp1261131:0.12925,(sp658172:0.08623,(sp1277257:0.06126,sp34021:0.0685):0.03314):0.06903):0.14313):0.15966,((sp1486262:0.02299,(sp686597:0.0286,sp1122214:0.02187):0.01023):0.06594,(((((sp358:0.00997,((sp1736278:0.00846,sp1336249:0.00613):0.01045,(sp1736332:0.00351,((sp28099:0.00436,(sp1763560:0.00148,sp1907666:7.4E-4):0.00714):0.00947,sp1736312:0.00216):0.00491):0.00838):0.00859):0.00618,(((sp1585697:0.00605,sp1368418:0.00763):0.0059,(sp1183432:0.00246,sp1183431:0.00303):0.00206):0.00246,sp1183434:0.0021):0.00598):0.01543,(sp359:0.01593,((sp311403:0.01644,(sp29450:0.00663,(sp411945:0.00891,(((sp410764:0.00315,(sp698761:0.00325,sp1860096:0.0046):0.00346):0.00172,sp52131:0.0032):0.00101,sp398:0.00373):0.00448):0.00431):0.00593):0.00669,((sp492774:0.01711,(sp384:0.01599,(((sp1703969:0.00158,((sp1132836:0.00685,sp1033991:0.00172):0.00111,sp395492:0.00156):6.9E-4):0.00206,sp526945:0.0014):0.00375,((sp1432049:0.00274,sp396:0.00154):0.00113,((sp1981173:0.00277,sp29449:0.00148):0.00289,(sp1138170:0.00229,sp1138189:0.00293):0.00139):0.00168):0.00451):0.00439):0.0056):0.00319,((((sp1042326:0.00376,(sp1211777:0.00623,(sp1500304:0.00524,sp990285:0.00571):0.00178):0.00146):0.00207,(sp1144312:0.00506,sp501024:0.00857):0.0031):0.00239,((sp1736592:0.00932,(sp1841654:0.00406,(sp1500258:0.00594,sp1500259:0.00406):0.00374):0.00187):0.00234,(sp1736432:0.01198,sp1736427:0.00768):0.00563):0.00505):0.00667,(sp1041146:0.01149,(sp538025:0.00214,sp56730:6.2E-4):0.00849):0.01094):0.00381):0.01583):0.02709):0.01855):0.01241,((sp1736473:0.03179,((sp1120688:0.00407,sp1848291:0.0035):0.01588,(((sp1566261:0.02967,sp1566262:0.01732):0.01068,((sp1144310:0.00417,(sp323656:0.00127,(sp323655:5.4E-4,sp690585:0.00222):0.00128):0.00473):0.0229,sp1532558:0.01924):0.00773):0.00422,(sp1125847:0.01716,sp1509405:0.02534):0.0155):0.00451):0.00727):0.01015,((sp1907415:0.02993,(sp1336235:0.028,(sp1736507:0.01179,(sp1523420:0.01902,(sp1907413:0.00879,(sp1156935:0.00374,sp1842536:0.00272):0.00269):0.00848):0.00996):0.01433):0.00736):0.00589,((sp1867956:0.02788,(sp887144:0.01662,(sp311402:0.00134,sp373:9.2E-4):0.00952):0.0098):0.01595,sp1370122:0.03645):0.01052):0.01105):0.00935):0.01515,(((((sp1736358:0.00376,(sp1566263:0.00192,(sp1736355:0.00308,sp1761900:0.00341):0.00127):0.0026):0.0342,(sp464029:0.03123,sp1672749:0.02124):0.021):0.01047,((sp1736506:0.01112,sp1856850:0.00939):0.01215,(sp1798805:0.03102,((sp1500301:0.0045,sp1041139:0.00485):0.00535,(sp1736543:0.01232,(sp1500257:0.00311,(sp1736360:0.01695,(sp1736456:0.00295,(sp1500305:0.00189,(sp1736545:0.00456,sp1612624:0.00611):0.00575):0.00133):0.0027):0.00338):0.00492):0.00448):0.00636):0.00996):0.00703):0.01228,((sp1873712:0.0066,(sp106592:0.00337,(sp1416753:0.0024,sp1945861:0.00398):0.00681):0.00415):0.00917,((sp366394:0.00604,(sp382:0.0037,sp935557:0.00606):0.00254):0.00862,(sp36856:0.00885,((sp1041159:0.01012,(((sp1472378:0.00524,(sp394:0.00179,sp1117943:0.00437):0.00371):0.00252,(sp794846:0.00156,sp1057002:0.00747):0.00154):0.00226,sp194963:0.00392):0.00467):0.00425,(sp716928:0.00421,(sp1848292:0.00222,sp1752398:0.00376):0.002):0.01166):0.00147):0.00677):0.00864):0.01336):0.00757,(sp1842534:0.01569,(sp1692241:0.00318,sp879274:0.00735):0.00849):0.03373):0.01115):0.02207):0.01116):0.01674,(sp1480615:0.0173,(sp1620421:0.03573,sp411684:0.02524):0.00922):0.06785):0.03713,(((sp1902579:0.04603,(sp1686310:0.06121,(sp1094558:0.04851,((((sp696125:0.01875,sp1933906:0.019):0.00818,(sp1933912:0.02035,sp545617:0.02545):0.01384):0.04101,(((sp1094492:0.01216,sp1094491:0.0064):0.00544,(sp1933904:0.01625,(sp1933903:0.00421,sp687861:0.00406):0.00352):0.00505):0.035,((sp1293911:0.01808,sp774:0.0146):0.04035,sp1318743:0.07365):0.01232):0.0054):0.00397,(sp1094489:0.05549,(((sp1205681:0.03416,(((sp807:0.00527,(sp1221525:0.00628,sp85701:0.00546):0.0029):0.00497,(sp634504:0.00776,sp1094556:0.02115):0.00269):0.01463,(((sp33046:0.01028,sp1094755:0.0129):0.01289,(sp1094562:0.00615,sp1094497:0.01047):0.00955):0.00251,((sp928210:0.01071,sp1095900:0.02322):0.00606,sp1094551:0.02616):0.00403):0.00191):0.00389):0.00367,(sp1094564:0.02036,(sp1225179:0.02886,(sp929794:0.01644,(sp1134510:0.02247,sp38323:0.01026):0.00401):0.00709):0.00422):0.00367):0.00326,sp33044:0.02642):0.0202):0.00561):0.04625):0.01073):0.02043):0.02736,((sp1494590:0.03302,(sp1881066:0.01286,(sp1144343:0.02069,sp1882772:0.01928):0.00644):0.04104):0.00999,(((sp1437448:0.00803,sp419475:0.00589):0.01942,(sp1895812:0.02399,(sp529:0.00495,sp94625:0.00261):0.00664):0.0092):0.02279,sp1289478:0.05513):0.01564):0.01352):0.03605,((((sp536018:0.05639,((((sp381:0.00507,(sp763057:0.00498,(((sp536019:0.00283,((sp1380350:0.00162,sp935548:0.00562):0.00379,(sp1298858:0.00367,(sp1165689:0.00425,(sp1287252:0.00172,(sp39645:0.00351,sp1736422:0.002):0.00124):0.00293):0.00231):0.00151):0.0019):0.00239,(sp1040987:0.00252,sp754035:0.00373):0.00195):0.00131,(sp1287276:0.01041,(sp1082933:0.00662,(sp1297570:0.00551,((sp1287292:0.00628,(sp1631249:0.00267,sp682633:0.01987):0.00737):0.00242,sp1297569:0.00263):9.1E-4):0.00257):0.00297):0.00422):0.00335):0.00998):0.00781,(sp1895781:0.01265,(sp1040986:0.01208,((sp1505933:0.00429,(sp69974:0.00136,sp1505946:0.00365):0.00113):0.00728,(sp1854058:0.00674,(sp1505932:0.00181,sp1505936:0.00755):0.00386):0.00321):0.00441):0.00585):0.00284):0.01811,((sp1736469:0.02518,(sp1529006:0.0117,sp1566387:0.01234):0.01835):0.00646,((sp1736477:0.01993,sp1736555:0.01253):0.01082,(sp1873176:0.03025,sp69279:0.04227):0.01152):0.00622):0.00851):0.01116,((sp1884373:0.02378,sp1192868:0.04263):0.01093,(sp1116369:0.0162,(sp83263:0.00899,sp1736420:0.0104):0.00936):0.02029):0.00801):0.02236):0.01849,(sp1120658:0.03251,(sp1121003:0.03967,sp935261:0.04961):0.02461):0.0099):0.00738,sp1381123:0.0582):0.01845,(sp472175:0.07035,((sp935840:0.02009,sp266779:0.01873):0.04535,((sp1231185:0.00399,sp204799:9.5E-4):0.02617,(sp721133:0.02399,(sp1670619:0.0141,sp391937:0.00739):0.02546):0.01058):0.0244):0.0138):0.02597):0.02797):0.01513):0.01761):0.01949):0.05484,((((sp1855383:0.10337,(sp1120956:0.04324,sp1120955:0.04592):0.07433):0.05109,sp631454:0.15956):0.01885,((((((sp1125973:0.02464,(sp639283:0.02086,(sp1168059:0.00222,sp177413:0.00231):0.03753):0.01683):0.04869,((sp78245:0.0233,sp1131814:0.02297):0.02867,(sp1038858:0.02223,sp438753:0.02418):0.02708):0.0351):0.0505,(sp1079:0.12758,(sp1187851:0.10777,((sp1429916:0.04942,((sp1736436:0.02766,(sp504832:0.0511,(sp709797:0.01782,((sp1197906:0.00324,sp211460:0.00429):0.00759,(sp1297863:0.00699,sp883078:0.0033):0.00375):0.00984):0.01432):0.00846):0.01996,((sp1895811:0.02274,(sp323097:0.014,(sp29421:0.00661,(sp323098:0.01227,sp314253:0.00776):0.00769):0.01127):0.03106):0.00921,(((sp1437360:0.02336,(((((sp1245469:0.00851,(sp288000:0.00609,sp114615:0.00585):0.00421):0.02979,(sp189753:0.00637,((((((sp1399419:0.00541,(sp43992:0.00274,(sp1223566:0.00546,((sp224911:0.0098,(sp1803665:0.00459,(sp1038862:0.00431,sp936455:0.00601):0.00423):0.00181):0.00213,((sp574934:0.00531,((sp1038867:0.00553,(sp1855318:0.00456,(sp1855319:0.00542,sp989370:0.00749):0.00288):0.0044):0.00546,((sp335659:0.01253,(sp376:0.00713,(sp1882760:0.01123,sp1615890:0.01205):0.0074):0.00608):0.00433,sp375:0.00683):0.00687):0.00325):0.00209,sp1855322:0.00338):0.00337):0.00447):0.00437):0.00133):7.5E-4,(sp108015:0.00237,sp1126627:0.00363):8.3E-4):0.0025,(sp1304877:0.01038,(sp1304878:0.00577,sp1768753:0.00799):0.00241):0.00168):0.00174,sp318996:0.0044):0.00113,sp1855321:0.00373):0.005,(sp443598:0.0035,sp1497613:0.0099):0.00298):0.00596):0.02712):0.01248,(sp1040989:0.02274,sp113395:0.01955):0.01476):0.01703,(sp1038860:0.00472,sp196490:0.00639):0.01926):0.01359,(sp1619232:0.02297,(sp1755647:0.01354,(sp172088:0.00629,(sp630921:0.00399,((sp1654716:0.00106,(sp1904807:0.00192,sp29448:0.00539):0.00305):0.00269,sp1230476:0.0022):0.00311):0.00263):0.00705):0.00721):0.0098):0.01083):0.01324,(((sp1298867:0.0049,sp1882747:0.00519):0.01341,(sp722472:0.01556,(sp1518501:0.00818,((sp190148:0.00336,sp280332:0.0032):0.00377,(sp1274631:0.00564,(sp1038859:0.00415,sp189873:0.00232):0.00346):0.00596):0.00435):0.01122):0.00394):0.00891,(sp255045:0.02227,(sp1380355:0.01259,sp1752203:0.02003):0.01295):0.00543):0.00619):0.01508,((sp1566285:0.00619,(sp1855306:5.4E-4,sp943830:0.00176):0.00616):0.03741,(sp316056:0.02773,(((sp316058:0.00954,sp316057:0.01328):0.00705,(sp1523430:0.01001,(sp652103:0.00716,sp395960:0.00565):0.02183):0.01226):0.02548,(sp1421013:0.03738,sp316055:0.02308):0.01281):0.00861):0.0121):0.01176):0.01125):0.01451):0.03451):0.07021,(sp1235591:0.09924,(sp674703:0.09674,sp1736466:0.10985):0.03193):0.01703):0.02695):0.04116):0.02278):0.0217,(sp1737983:0.13287,((sp1884352:0.15743,((sp444444:0.00493,sp1702325:0.00544):0.06757,(((sp53254:0.01222,(sp1907408:0.01916,(sp1510531:0.01083,sp1036780:0.01398):0.00495):0.00588):0.02002,((sp406341:0.01606,((sp1502851:0.00172,sp506668:0.00178):0.01965,(sp1736346:0.01472,((sp1526658:0.00952,sp1792307:0.01607):0.00432,(sp1768796:0.02152,(sp1736524:0.01732,(sp1523417:0.01289,(sp1842539:0.00413,sp1768801:0.00712):0.00677):0.00442):0.00766):0.00401):0.00841):0.01605):0.01368):0.00992,(sp1881058:0.00857,(sp1036779:0.00528,sp1736544:0.01041):0.00567):0.00747):0.01375):0.09265,((sp1653334:0.07379,sp1123229:0.06288):0.05021,((((sp1736364:0.02133,((sp1101192:0.00702,(sp1736242:0.0028,(sp1101191:0.00271,sp1131813:5.4E-4):0.00302):0.00512):0.01163,((sp1736254:0.00158,(sp1736265:7.5E-4,sp1736245:0.00426):0.00174):0.00693,(sp582675:0.00738,(sp1736251:0.00388,sp1736387:0.00166):0.0072):0.00937):0.00756):0.00512):0.02127,(((sp1730094:9.5E-4,(sp269660:0.0035,sp582667:5.3E-4):0.0029):0.0084,(sp582672:0.00557,(sp1502748:0.00249,(sp426355:0.00617,sp693986:0.00212):0.00137):0.00168):0.00439):0.03037,((sp1736382:0.00834,sp414703:0.00535):0.00659,(sp272630:0.00926,(sp441620:0.00257,sp648885:0.0032):0.00455):0.00563):0.02451):0.01766):0.03759,((sp426117:0.02031,sp460265:0.00982):0.01669,(sp1502749:0.00377,(sp270351:0.03075,sp427683:0.00472):0.00358):0.03393):0.01819):0.04095,(sp1411123:0.05508,(sp1033741:0.05656,((sp549386:0.0156,sp1225564:0.00929):0.0087,(sp1336243:0.01436,(sp1549810:0.01524,(sp864069:0.00716,sp420324:0.00464):0.00343):0.00501):0.00501):0.03462):0.01621):0.01493):0.01841):0.01821):0.01127):0.01292):0.01574,(sp1882748:0.09223,(((sp595536:0.02939,(sp107635:0.00105,(sp136993:0.00252,sp107636:5.4E-4):0.00225):0.0214):0.03772,(sp655015:0.06117,(sp187303:0.04031,sp1134912:0.04092):0.01913):0.01279):0.04421,(sp876269:0.0602,((sp395963:0.01591,sp231434:0.0239):0.04479,(sp395965:0.0513,(sp1612308:0.0418,sp663610:0.03026):0.01313):0.01648):0.01538):0.0301):0.01501):0.05093):0.01872):0.01423):0.01689,(sp1101190:0.05437,sp1120792:0.0353):0.10142):0.04044,((sp665467:0.14267,(sp1122133:0.04044,(sp1122132:0.01488,sp1122131:0.01931):0.03073):0.07119):0.03351,((sp1709001:0.0584,(sp1122963:0.0172,sp1122962:0.0159):0.07815):0.08651,(sp1123029:0.1076,sp665126:0.13807):0.0242):0.01684):0.01274):0.02568):0.00884,(sp655353:0.1522,((sp1120983:0.10635,sp1317123:0.17494):0.04774,((sp538381:0.03507,(sp1881061:0.01009,sp1123294:0.00615):0.03901):0.05187,((sp197461:0.04719,(((sp285279:0.00886,(sp1481932:0.01578,(sp911045:0.00359,sp1898042:0.00143):0.00758):0.00312):0.00869,(sp989403:0.00946,sp1798213:0.02667):0.00879):0.02757,(sp1647556:0.02057,sp1807766:0.02528):0.0293):0.0172):0.05489,((sp121719:0.0448,sp991905:0.02449):0.02354,(sp735517:0.04794,(sp744980:0.03871,((sp1905358:0.00505,sp388408:0.01119):0.0207,(sp187304:0.02014,((sp311410:0.00486,sp681847:0.01082):0.01906,sp1561204:0.02622):0.00811):0.00725):0.02004):0.01781):0.01622):0.02666):0.01533):0.03802):0.02215):0.01753):0.01084):0.02338):0.02522,((sp1177755:0.11558,sp1384459:0.08709):0.07315,(sp648757:0.15987,((sp1752228:0.02198,sp1892844:0.01418):0.10644,(sp418854:0.09946,((sp1892846:0.04022,sp121290:0.05865):0.04647,(((sp670307:0.00633,(sp113574:0.00141,sp582899:0.0014):0.01226):0.01681,(sp717785:0.01661,(sp1163419:0.00976,sp51670:0.00633):0.01939):0.01255):0.1006,(sp1267005:0.02563,sp1892845:0.03045):0.04913):0.02319):0.02274):0.03365):0.09562):0.03028):0.03894):0.02353,((sp402881:0.12756,(sp1333998:0.10141,sp1282876:0.10601):0.0244):0.02829,(sp1458461:0.15263,(sp1397666:0.0095,sp1220535:0.01621):0.17716):0.02233):0.04007):0.0247,(sp1495045:0.22014,((sp1852618:0.13752,(sp1247963:0.08601,sp314260:0.1174):0.0736):0.08925,(((sp1121948:0.10155,sp1123059:0.11247):0.13561,(sp1161401:0.16926,((sp144026:0.0688,(sp1772333:0.01033,sp394221:0.01346):0.04104):0.0708,(sp1123503:0.09052,(sp1479238:0.09778,(sp1852617:0.05341,(sp1122613:0.02082,sp314254:0.01233):0.05101):0.0504):0.02378):0.044):0.04692):0.02429):0.03107,(((sp582402:0.028,sp551275:0.02624):0.13071,(sp551789:0.11089,((((sp1280949:0.00861,(sp1280944:0.00773,sp1280952:0.0076):0.00471):0.04281,((sp1280941:0.00405,sp1280946:0.00675):0.0141,(sp1207058:0.01746,sp1280948:0.01421):0.01403):0.02344):0.01243,((sp1629710:0.01323,((sp1280947:0.00604,sp1280953:0.00426):0.01391,sp1280950:0.02516):0.00742):0.04032,(sp1280954:0.01274,sp228405:0.02066):0.07115):0.01374):0.07622,(sp1906738:0.08959,(sp545261:0.04208,(sp1977912:0.03104,(sp1121949:0.06154,sp568102:0.02723):0.02056):0.01591):0.05253):0.03835):0.06211):0.03675):0.06885,((sp1605283:0.05079,(sp1759059:0.03894,sp1752192:0.03779):0.04102):0.16517,((sp1382303:0.09246,((sp155892:0.01861,(((sp1502775:0.00438,(sp69395:0.01838,((sp1298862:0.0025,(sp1736547:0.00395,(sp1736578:0.01304,sp366602:0.00726):0.00813):0.01178):0.00851,sp1736579:0.00253):0.00295):0.00512):0.01035,sp1449049:0.00711):0.01913,(sp1736519:0.01599,(sp190650:0.00842,(sp1292034:0.01021,sp509190:0.01318):0.00619):0.00827):0.00657):0.00734):0.05823,((sp1736591:0.02943,sp1736445:0.01918):0.03314,(sp31967:0.05342,(sp450851:0.02818,(sp1801944:0.02147,sp1660129:0.0548):0.01587):0.0233):0.0164):0.02154):0.03284):0.01876,((sp1121123:0.06359,(((sp1736353:0.0449,((sp633149:0.01033,sp1938605:0.00855):0.03873,(sp1523422:0.00332,sp1121124:0.00565):0.02161):0.02067):0.00803,((sp1797585:0.03706,sp871741:0.00603):0.02442,(sp1736443:0.01784,sp1736569:0.04032):0.01264):0.01103):0.00745,((sp293:0.00894,sp588932:0.01078):0.03262,((sp1827469:0.0032,sp172043:0.00342):0.01314,(sp1532555:0.00335,sp1797588:0.03548):0.01067):0.02453):0.00973):0.06088):0.03281,((sp573065:0.02716,sp1282363:0.02022):0.02855,((sp1282361:0.01065,(sp1282360:0.00729,sp715226:0.0049):0.00859):0.035,(sp1282362:0.02515,(sp1121022:0.03224,sp260084:0.01152):0.01358):0.01987):0.03364):0.07313):0.01791):0.11006):0.04361):0.02541):0.04059):0.03607):0.01828):0.0201):0.03478):0.02547,sp1862950:0.2287):0.02647,(sp1110502:0.20507,sp1089551:0.2657):0.06):0.02751):0.02845):0.02626):0.06098,((((sp86106:0.23627,sp696127:0.34543):0.1653,(sp1797229:0.58352,((sp1714371:0.03138,(sp434131:0.01493,sp222891:0.02393):0.02175):0.69605,((sp955:0.12547,(((sp1605993:0.01526,sp66084:0.0106):0.02432,(sp125593:0.02874,sp1236908:0.02011):0.06378):0.02246,(sp292805:0.05831,(sp246273:0.03561,sp100901:0.09297):0.01345):0.02413):0.06086):0.19563,((sp779:0.05073,(sp269484:0.02127,(sp205920:0.01525,sp391036:0.04084):0.00939):0.03105):0.1076,(sp1359163:0.15557,(sp212042:0.11051,(sp320483:0.03168,sp574556:0.02468):0.09143):0.16683):0.03906):0.17267):0.13166):0.1796):0.05837):0.04546,(sp1528098:0.31141,(((sp357244:0.076,sp1359168:0.0836):0.32705,(sp33990:0.06115,((sp272947:0.01044,sp1003202:0.02146):0.03949,(sp1144888:0.01335,(sp293613:0.03822,(sp783:0.01408,((sp315456:0.00618,(sp293614:0.02043,sp1105110:0.01206):0.00698):0.00429,sp109232:0.00899):5.6E-4):6.8E-4):0.00121):0.00416):0.04056):0.20746):0.18327,sp1895704:0.34906):0.07147):0.04451):0.0715,(sp1274402:0.45227,(sp1895705:0.32437,(sp1427503:0.09943,sp1399147:0.06419):0.36407):0.28585):0.10697):0.0241):0.04983):0.12984):0.06594,(((sp1805428:0.03277,sp1805430:0.03368):0.12558,((sp314344:0.09209,sp1921010:0.07662):0.06571,(sp1805426:0.15326,(sp1485545:0.07095,sp1805429:0.08382):0.1136):0.0308):0.05379):0.34688,((sp381306:0.30066,((sp1123368:0.12676,(sp637389:0.06356,(sp243159:0.02041,(sp743299:0.00697,sp920:0.01121):0.01323):0.07222):0.16069):0.07877,(sp163359:0.2617,((((((((sp1122134:0.00964,sp523791:0.01219):0.02965,(sp1144748:0.01872,sp914150:0.01964):0.03519):0.13481,(((((sp1120963:0.06318,(((sp151081:0.03622,(sp1268239:0.04476,((sp161398:0.01726,((sp327939:0.00223,sp1859457:0.00305):0.01448,(sp1117314:0.01946,((sp570156:0.00279,sp874454:0.00297):0.00724,(sp162160:0.00324,((sp1761893:0.00218,((sp1938600:0.00247,sp247523:0.00258):0.00232,(sp283699:0.00189,(sp1761891:0.00721,sp1315283:0.01399):0.00175):0.00842):0.00774):0.0039,(sp152297:0.0058,(sp1348393:0.00504,(sp187330:0.00807,(sp182141:0.00152,sp206042:0.00305):0.00363):0.00486):0.00459):0.00236):0.00294):0.00953):0.02006):0.00848):0.00921):0.0062,(sp43658:0.00982,(sp1365249:0.00109,(sp1365254:8.0E-4,(sp43657:7.8E-4,sp1365251:5.5E-4):0.001):0.00147):0.01207):0.00648):0.00658):0.00741):0.00972,(sp1117319:0.0027,sp1348114:0.00266):0.02764):0.00804,(sp87626:0.04177,(sp1123010:0.01162,sp1690037:0.00798):0.05414):0.0138):0.05195):0.02315,((sp1513271:0.05438,(sp1046714:0.03449,(sp1328313:0.00869,sp659495:0.01057):0.01821):0.01802):0.06622,(((((sp1127673:0.03246,((sp342610:0.00332,sp983545:0.0053):0.02878,(sp1799789:0.05245,(sp1129794:0.00838,sp493475:0.00785):0.02672):0.01035):0.02339):0.00659,(sp56804:0.05412,(sp1121922:0.01765,sp1085623:0.01474):0.03128):0.03463):0.00864,(sp1120953:0.02931,((sp1656094:0.02681,(sp634436:0.01158,sp1856405:0.01934):0.01183):0.00768,(((sp589873:0.01053,(sp314275:0.002,((sp1917157:0.00503,(sp1912139:0.00344,sp28108:0.0025):0.0029):0.00177,sp1298865:0.00404):0.00121):0.0079):0.00288,(sp233316:0.02076,(sp1917158:0.00501,sp1537994:0.05069):0.01096):0.00534):0.01596,(sp1929465:0.02666,sp1123236:0.03851):0.01055):0.00635):0.01975):0.01289):0.01464,sp1526571:0.05011):0.05044,((sp1036674:0.06156,sp1298881:0.03986):0.04411,((sp435908:0.04259,((sp1517416:0.01427,sp1122124:0.01717):0.00698,((sp519452:0.00989,sp519453:0.00721):0.00495,sp1159017:0.03639):0.01373):0.01031):0.03202,(sp740709:0.03185,((sp314276:7.7E-4,sp1889913:0.00227):0.01954,(sp86103:0.01327,(sp86102:0.00348,sp1321370:0.00617):0.0128):0.01303):0.02792):0.01871):0.02172):0.0494):0.02931):0.01149):0.01272,((sp152573:0.0413,((sp506534:0.02173,sp1123055:0.02576):0.02067,((sp1123054:0.02045,(sp1195246:0.00329,sp1129374:0.00407):0.0166):0.00452,(sp562729:0.02515,((sp1123053:0.00657,sp173990:0.00853):0.0041,sp1628148:0.04067):0.00482):0.00546):0.01894):0.02414):0.07611,((sp1763536:0.02592,sp1535422:0.02741):0.03125,((sp349064:0.03856,sp1742724:0.03569):0.01634,(sp485447:0.02368,(((sp1911682:0.00625,sp1917165:0.0023):0.02486,(sp1888913:0.00883,(sp329993:0.00574,(sp641665:0.01292,(sp1820336:0.00385,(sp1816219:0.00634,sp326537:0.00602):0.00404):0.00433):0.00262):0.00641):0.01645):0.00567,(sp1816218:0.03346,(sp28229:0.00686,(sp167879:0.00763,(sp1265503:0.0079,sp58049:0.01898):0.02345):0.00752):0.03037):0.01539):0.0148):0.00856):0.01026):0.08368):0.01337):0.01885,((((((sp1460644:0.05426,((sp334715:0.00528,((sp390883:0.00191,sp414286:0.00135):0.0029,(sp1882823:0.00804,sp272773:0.00618):0.00433):0.01592):0.03488,(sp1080227:0.02103,(((sp1121868:0.01508,sp1121869:0.01986):0.00671,((sp1121867:0.00315,sp1190603:0.0103):0.01486,sp1460642:0.0139):0.00904):0.00262,(sp673:0.00686,sp1796497:0.00695):0.00496):0.01043):0.01093):0.01152):0.01001,(((sp1654360:0.05388,sp265726:0.00935):0.01842,((((sp1903952:0.01144,sp858640:0.01315):0.00698,(sp658445:0.0122,(sp320778:0.01521,sp265901:0.00865):0.00224):0.00163):0.00325,(sp1195763:0.00953,sp754436:0.03073):0.00672):0.00359,((sp85581:0.0156,(sp553611:0.01,(sp659:0.00895,sp318456:0.0026):0.0226):0.0067):0.01041,sp298386:0.05095):0.00662):0.01118):0.0238,((((sp1123493:0.00775,sp1188252:0.0147):0.01947,(sp1603038:0.0265,(sp1481914:0.01194,(sp553239:0.00798,(sp1219080:0.00496,sp1853258:0.0089):0.0037):0.01011):0.00665):0.00626):0.01039,((((sp29495:0.00935,sp672:0.00954):0.01527,(sp55601:0.02884,((sp1216006:0.02252,(sp1123497:0.00239,sp1123498:8.9E-4):0.02571):0.00986,((sp1435069:0.0168,sp1918946:0.04802):0.00781,((sp1123491:0.0109,(sp675813:0.0175,sp1348635:0.01808):0.01001):0.00176,(sp676:0.01095,(sp243277:0.00367,sp674:0.00186):0.02239):0.00457):0.00953):0.0061):0.00254):0.0036):0.0065,(((((((sp691:0.0079,(sp670:0.00422,sp669:0.00406):0.0026):0.00119,(sp50718:0.00839,(sp1219077:0.00993,sp1123494:0.0198):0.00208):0.00784):0.00593,((((sp379097:0.00474,sp945550:0.00221):0.00354,(((sp675816:0.00426,sp796620:0.01129):0.00316,sp945543:0.0053):0.00119,((sp1051646:0.0011,sp1647102:0.00218):0.00169,(sp29498:0.00251,sp579748:0.00666):0.00141):0.00197):0.00242):0.0021,(sp526588:0.01513,(sp170651:0.00211,sp190893:0.00397):0.00206):0.00226):0.00586,(sp171383:0.00476,sp693:0.00806):0.00275):0.00339):0.00197,((sp1381081:0.00169,sp265668:0.00578):0.00913,(sp45658:0.0024,sp1461322:0.01185):0.01781):0.00955):0.0032,((sp1219065:0.01181,sp861298:0.01861):0.0054,sp1004316:0.01653):0.00396):0.00338,(((sp29497:0.01319,sp1187848:0.02755):0.01124,(sp990268:0.0257,sp689:0.00547):0.01134):0.00525,sp663:0.01342):0.00332):0.00162,(sp1004326:0.02242,sp1117707:0.03553):0.05093):0.00107):0.00839,sp28173:0.01889):0.00263):0.01582,(sp312309:0.01098,(sp80852:0.00168,(sp1840087:0.00302,sp688:0.00704):0.00694):0.01481):0.03209):0.02093):0.01007):0.04205,((sp703:0.04936,(((sp1005058:0.00274,sp155515:0.00326):0.01017,(sp505345:0.00518,sp505341:0.01597):0.00594):0.0264,((sp1122938:0.00827,sp505317:0.00772):0.04552,((sp1304873:0.00528,sp747:0.00452):0.01022,((((sp205914:0.02065,sp733:0.00731):0.01664,(((sp221988:0.00964,sp1604354:0.02625):0.01373,sp339671:0.02784):0.00664,(sp1906744:0.02402,(sp1035188:0.00579,((sp1907939:0.00665,((sp1908264:0.00495,(sp1908258:0.00281,sp1908260:0.00265):0.00234):0.00208,(sp1906745:0.0036,((sp1908257:9.2E-4,sp758:0.00439):7.1E-4,(sp1908266:0.00229,(sp1908525:0.00411,sp1679001:0.00269):0.00116):0.00241):0.00478):0.00215):0.00655):0.00375,((sp1661745:0.00315,sp71421:0.00419):0.00224,sp727:0.01372):0.00301):0.00328):0.00863):0.01241):0.00404):0.00293,((sp728:0.02614,(sp908285:0.0243,(sp1400001:5.5E-4,sp1461579:0.00135):0.00436):0.00957):0.00966,((sp732:0.00893,(sp1321772:0.00498,(sp739:0.00481,(sp1089447:0.0027,sp714:0.00658):0.00379):0.00282):0.00372):0.02634,(sp123822:0.01699,sp667128:0.01447):0.00785):0.00672):0.01071):0.0028,(sp97481:0.06416,(((sp67855:0.01407,(sp738:0.01678,sp1263831:0.0209):0.00543):0.00685,sp1924934:0.02063):0.00997,(((sp591023:0.00769,(sp1035839:0.01218,(sp736:0.00227,sp735:0.00225):0.00703):0.00823):0.01049,(((sp416269:0.00417,sp730:0.02398):0.00206,sp202947:6.6E-4):0.00463,(sp1120931:0.00345,sp734:0.01572):0.00663):0.00701):0.00461,(sp1122190:0.00746,(sp1432056:0.0047,(sp1433287:0.00386,sp75985:0.01077):0.00225):0.00514):0.01054):0.01129):0.0156):0.02576):0.00566):0.01742):0.00957):0.05761):0.01095,(((((((((((((sp1267600:0.02596,(sp379893:0.01516,sp1121863:0.00611):0.01371):0.0073,(sp1443113:0.02728,sp1917880:0.01068):0.01105):0.00626,(sp1109412:0.01333,sp71657:0.0195):0.00476):0.00217,sp561229:0.01443):0.01949,(((sp579405:0.01016,sp104623:0.02529):0.01076,(sp568768:0.00738,(sp590409:0.0044,(sp1089444:0.00287,sp198628:0.005):0.00253):0.00263):0.0011):0.00104,sp1225785:0.00643):0.00841):0.0015,(sp598467:0.00952,((sp561230:0.001,(sp55207:0.00273,(sp180957:0.00277,(sp29471:0.00736,sp1166016:0.00109):0.00192):6.8E-4):0.00184):0.00172,sp554:6.3E-4):0.00793):0.00715):0.00651,((((sp158822:0.00378,sp566551:0.00205):0.00652,(sp82977:8.0E-4,(sp1006004:0.00175,sp1354252:0.00164):0.01029):0.01212):0.00864,((((((((sp1681196:0.01318,sp1761782:0.01013):0.00361,(sp1686381:0.009,(((sp1218113:0.00705,sp580:0.00323):0.00606,sp1006000:0.00317):0.00326,sp51288:0.00357):0.00772):0.00233):0.0022,((sp1197719:0.00169,sp90371:0.00186):0.00312,(((sp637910:0.00181,sp35703:0.00322):0.00213,(sp83655:0.00946,(sp1115515:0.00687,sp208224:0.00604):0.00455):0.00766):0.00783,sp511145:0.00414):0.00203):0.00297):0.00359,((sp1002368:0.00784,((sp54291:0.00473,sp571:0.00306):0.0044,((sp399742:0.00585,sp61646:0.00436):0.00416,(sp640513:0.0027,(sp550:0.00598,sp69218:0.00275):0.0011):0.0014):0.00564):0.0034):0.00438,(sp61648:0.00455,(sp283686:0.00625,(sp208223:0.00876,(sp1692238:0.00601,sp1166130:0.00121):0.00235):0.00143):0.00325):0.00234):0.00174):0.00103,sp548:0.01062):0.00212,(sp1159613:0.00135,(sp28141:0.00203,sp1073999:0.00352):8.0E-4):0.00686):0.00232,(sp1384589:0.01335,sp1224136:0.0173):0.00385):0.00387,(sp1691903:0.01612,sp630626:0.01624):0.00303):0.00347):0.00494,(((((((sp574096:0.00311,(sp553:7.2E-4,sp660596:0.00337):0.00182):0.00558,(sp470931:0.00316,sp549:0.00235):0.00554):0.00718,sp1560354:0.03764):0.00281,(((sp1225184:0.01893,((sp1076550:0.00331,sp470934:0.00125):0.00744,(sp1484158:0.0094,sp59814:0.00368):0.00168):0.00327):0.00151,(sp472705:0.01784,sp592316:0.00395):0.00833):5.4E-4,sp55209:0.04895):0.00389):0.00455,(((sp642227:0.00843,(sp1408192:0.0035,sp480813:0.01463):0.00856):0.01381,(sp988801:0.01962,sp1336237:0.03742):0.00965):0.00553,(sp1619313:0.01706,((sp1274722:0.00862,sp1560201:0.00642):0.00862,((sp65700:0.01459,(sp371042:0.00794,sp634500:0.01385):0.00431):0.00307,(((sp1219360:0.00304,sp1628855:0.00397):0.00334,sp1736225:0.01221):0.00235,((sp1161919:0.00383,sp465817:0.00393):6.1E-4,sp665029:0.01229):0.0038):0.00632):0.0042):0.00526):0.00644):0.00175):0.00247,(sp1484157:0.00368,sp1891675:0.00496):0.00816):0.00337,(sp1926881:0.00164,sp1367852:0.00489):0.01852):0.00818):0.008):0.00492,((((sp667129:0.00663,(((sp47917:0.00796,(sp614:0.00465,(sp82996:0.00474,(sp399741:0.00457,sp82995:0.003):0.00254):0.00287):0.00521):0.00147,(((sp1410619:0.01475,sp1914994:0.00362):0.00924,sp1524467:0.00334):0.00307,sp1441930:0.00384):0.00376):0.00163,sp138074:0.02176):0.00255):0.00838,((sp29486:0.00651,sp935293:0.00313):0.00766,(sp214092:0.0056,((sp631:0.00431,(((sp28152:0.00208,sp630:0.00583):0.00122,(sp33060:0.00213,(sp1453495:0.00876,sp1288385:0.00339):0.00559):6.6E-4):0.00132,sp29485:0.0032):6.1E-4):6.8E-4,sp29484:0.0032):0.00299):0.00448):0.01499):0.00285,((sp1646377:0.00234,(sp1736223:0.00722,sp932213:0.00283):0.00299):0.01278,(sp910964:0.00608,(sp1736224:0.00632,sp745277:0.0032):0.00431):0.00571):0.01299):0.00327,sp569:0.02071):0.00921):0.00423,(((sp230089:0.00571,((sp880156:0.00605,(sp286156:0.00418,sp291112:0.0041):0.00252):0.00251,sp29488:0.00829):0.00278):0.01265,((sp351679:0.00913,((((sp1354304:0.00899,(sp351671:0.0043,(sp1873482:0.00371,sp351672:0.00712):0.00292):0.00218):0.00203,(sp53341:0.0067,sp351656:0.00504):0.00212):0.0011,sp880157:0.00743):0.00128,(sp351659:0.0148,sp40576:0.01502):0.0026):0.00896):0.00198,(sp40578:0.00801,(sp1427518:0.00684,sp351675:0.00532):0.00328):0.00148):0.0107):0.00762,((sp582:0.0282,(sp584:0.01069,(sp1354337:0.00627,(sp585:0.00302,sp1354271:0.00673):0.0027):0.00373):0.02424):0.00896,((((sp1141662:0.01075,sp333962:0.01375):0.0035,((sp1256989:0.00481,sp500637:0.00703):0.0064,sp587:0.00332):0.00299):0.00376,sp588:0.00471):0.01348,(sp158849:0.01906,sp1121018:0.03995):0.01314):0.0071):0.0072):0.02169):0.00995,((sp67780:0.00577,(sp636:0.00171,sp93378:0.00208):0.01021):0.02393,(sp1214065:0.02813,(sp82985:0.01058,sp1111728:0.0144):0.02759):0.01157):0.00423):0.00381,(sp2342:0.01558,((sp1778262:0.09509,(((sp1778263:0.11925,(sp1070130:0.12552,(((sp1778264:0.09847,sp1835721:0.09985):0.14295,(sp186490:0.08515,sp374463:0.12136):0.08401):0.01998,sp134287:0.13941):0.01214):0.01326):0.01575,sp903503:0.12537):0.00848,sp1199245:0.09651):0.00359):0.00481,sp343509:0.00799):0.00157):0.03211):0.00542,((((sp476281:0.22427,((sp1715285:0.1825,sp634113:0.17038):0.03055,((sp1505597:0.25689,((sp291272:0.13305,(sp859654:0.17517,sp203907:0.15625):0.08084):0.10642,sp1505596:0.26549):0.03928):0.06426,((((sp198804:0.05881,sp1265350:0.08721):0.031,(sp118101:0.09226,(sp1009858:0.0552,(sp1005057:0.09323,(sp563178:0.03606,sp1005090:0.03961):0.02011):0.01323):0.01491):0.02277):0.10655,((sp98804:0.24762,((sp1878935:0.07213,sp261317:0.08138):0.11155,(sp372461:0.12053,(sp655384:0.12917,sp9:0.14737):0.02991):0.0804):0.04953):0.12132,(sp118110:0.17371,sp224915:0.16921):0.08123):0.03398):0.05127,(((sp36870:0.15849,sp1142511:0.17678):0.15185,(sp1719126:0.33684,sp401619:0.4091):0.08912):0.07433,sp1410383:0.21311):0.04261):0.03224):0.03866):0.02548):0.03043,sp1235990:0.14882):0.02822,sp1922217:0.16369):0.03951,((sp1878942:0.09823,sp663321:0.11628):0.01457,sp572265:0.17637):0.0133):0.01374):0.01337,((sp1387197:0.03286,(sp1267021:0.02176,((sp1798183:0.00481,(sp1798182:6.6E-4,sp1908520:0.00494):0.0027):0.00214,(sp1970471:0.00588,sp1196095:0.00964):0.00251):0.02678):0.0158):0.04247,sp1123402:0.10472):0.01681):0.02004):0.04142):0.02212,(((sp326297:0.02796,sp1515746:0.03758):0.00973,(((sp1336233:0.01681,(sp23:0.01065,(sp1565129:0.00324,sp323850:0.00514):0.00805):0.00395):0.00419,((sp225849:0.01131,(sp1336247:0.01074,(sp398579:0.00125,sp458817:0.00326):0.00763):0.00434):0.01284,((sp425104:0.00987,(sp1917163:0.01003,(sp637905:0.01336,sp225848:0.00771):0.01261):0.00624):0.00328,sp392500:0.00965):0.01141):0.00839):0.02608,((sp365591:0.01466,(sp319224:0.00178,(sp94122:0.00235,(sp211586:6.7E-4,sp332186:0.00127):7.1E-4):0.00925):0.00437):0.01277,((sp93973:0.00715,sp1917164:0.01082):0.01819,(sp318167:0.01591,sp318161:0.01283):0.01023):0.00824):0.014):0.01048):0.0771,((sp1121878:0.01672,sp1121879:0.02245):0.03192,(sp550540:0.02205,(sp1121880:0.04136,sp299255:0.0261):0.00749):0.02712):0.03232):0.02141):0.01112,((sp745411:0.00918,sp584787:0.01206):0.08678,((sp511062:0.00594,sp1279015:0.01033):0.05659,((sp1283284:0.00626,sp595494:0.0121):0.06047,((sp650:0.00211,(sp646:0.01258,(((sp644:0.005,(sp382245:0.00745,sp73010:0.00576):0.00458):0.00118,(sp440079:0.00691,sp29489:0.00958):0.00215):0.00798,sp649:0.00581):0.00126):0.00666):0.02088,(sp1907416:0.01919,(sp218936:0.00922,sp652:0.00881):0.00461):0.01189):0.04146):0.02374):0.01707):0.01127):0.01323,((sp1120969:0.03288,(sp680279:0.00763,sp1331007:0.01338):0.0372):0.05619,((sp1202962:0.00408,(sp1201293:0.01135,(sp756698:0.00958,sp80854:0.0024):0.01149):0.00268):0.09543,(sp314282:0.05243,(sp1123036:0.03401,(sp357804:0.04505,(sp1278312:0.00802,sp1278307:0.00792):0.01042):0.00832):0.0123):0.07443):0.0308):0.01856):0.01346):0.02766,(((sp1262974:0.06527,(sp1410676:0.0042,sp83771:0.00257):0.02126):0.07492,(sp1120988:0.0739,sp762983:0.06303):0.0199):0.09788,(sp1265507:0.12234,(sp758828:0.12803,sp867:0.10417):0.02206):0.06355):0.11514):0.06551):0.03527,(((sp83406:0.18845,((sp391936:0.07722,((sp1094342:0.00125,sp930169:0.00336):0.03887,(sp1177179:0.0159,((sp1177154:0.01173,sp1397527:0.00725):0.02515,(sp236097:0.019,(sp1113895:0.00534,sp1177181:0.00671):0.0138):0.00831):0.00847):0.03133):0.03901):0.0788,((sp1852776:0.0422,sp1122951:0.02623):0.08225,(((sp34059:0.0438,(sp34062:0.03332,(sp1122243:0.00537,sp1230338:0.01446):0.02493):0.01436):0.02775,((sp90241:0.05883,((sp1123033:0.01371,((sp1945520:0.00451,(sp1002339:0.00642,sp349106:0.00883):0.00529):0.00358,(sp1945521:0.00243,sp1123034:0.00239):0.00318):0.00896):0.03362,(sp494416:0.01546,((((sp1849383:0.01112,sp1926479:0.01296):0.00481,(((sp261164:0.00493,((sp1720344:0.00606,sp554343:0.00122):0.00637,sp1699623:0.00382):0.00354):0.00469,(sp1354303:0.00817,(sp56810:0.00716,(sp1028416:0.01311,(sp259536:0.00449,sp335284:0.00405):0.00343):0.00677):0.00388):0.00301):0.00413,(sp1055815:0.00554,sp1112209:0.0053):0.00457):0.00357):0.00329,(sp45610:0.02583,sp1699624:0.00565):0.00401):0.00576,sp1926478:0.00827):0.01018):0.0437):0.02215):0.0361,((sp34061:0.00962,(sp480:0.01086,(sp470453:0.00938,sp573983:0.00522):0.00403):0.00329):0.01421,(sp29433:0.01084,((sp1349775:0.02814,(sp478:0.01251,(sp477:0.00105,(sp476:0.00306,sp1122244:0.00281):0.00121):0.00196):0.01351):0.01188,sp34060:0.06435):0.00502):0.01659):0.04007):0.02607):0.10058,((sp1120977:0.00387,sp1907941:0.00671):0.04434,((sp1392540:0.02132,sp1219383:0.02636):0.01588,((((sp756892:0.01027,(sp202952:0.0139,((sp1871111:0.01116,(sp1029823:0.01164,(sp1879050:0.00693,(sp106648:0.00395,sp106649:0.00535):0.00576):0.0045):0.0046):0.00641,(sp346222:0.0145,((sp1977883:0.0113,(sp1226327:0.0063,sp1977880:0.00309):0.0038):0.00599,(((sp202951:0.00801,(sp1879049:0.01147,((sp1242245:0.00323,sp1977884:0.00374):0.00895,(sp28090:0.00491,sp1805635:0.00445):0.01188):0.00218):0.00357):0.00242,((sp1324350:0.00767,sp1977876:0.01375):0.01286,((((sp1805634:0.00693,sp1977878:0.00325):0.00727,(sp595670:0.00883,sp1646498:0.01217):0.00329):0.00373,((sp1977874:0.02107,sp1407071:0.01798):0.00734,(((sp1977875:0.00505,sp1977882:0.00478):0.01557,sp1891224:0.02476):0.00307,(sp1977881:0.01442,sp1353941:0.02185):0.00458):0.01143):0.00365):0.01448,sp1806892:0.00937):0.00438):0.00151):0.00518,((sp1960940:0.00306,(sp1443941:0.00927,sp1977877:0.00474):0.00289):0.00842,(sp202956:0.01578,((sp1509403:0.01392,(sp108981:0.00956,sp1217693:0.00579):0.00265):0.00175,sp1608473:0.00953):0.00404):0.00244):0.00199):0.0031):0.00442):0.00513):0.0065):0.00562):0.00507,(sp202954:0.01704,((sp396323:0.01554,((sp108980:0.01409,(sp202950:0.00694,sp487316:0.00634):0.00797):0.00478,(((((sp134533:0.01924,sp29430:0.00576):0.00183,sp40215:0.00666):0.00327,(sp1217692:0.00999,(sp202955:0.00768,sp262668:0.00554):0.00261):0.00552):0.0014,(sp1561217:0.00541,(sp134534:0.00311,(sp1217694:0.00162,((sp1217708:0.00457,sp1144672:0.00166):0.00255,sp1217698:0.00306):8.3E-4):0.00361):0.00228):0.00361):0.00896,(sp471:0.00801,(sp48296:0.00104,(sp106654:0.00178,sp470:0.00841):0.00201):0.00295):0.0077):0.00476):0.00383):0.00552,sp40216:0.02023):0.00439):0.00528):0.00487,((sp632955:0.01448,sp1789224:0.01469):0.01578,sp281376:0.03419):0.01233):0.00544,sp1262585:0.02663):0.0077):0.03425):0.04589):0.07165):0.08306):0.02972):0.02901,((((sp1121935:0.03904,sp349521:0.05066):0.06851,(sp86177:0.14563,((sp488535:0.01165,sp488533:0.01167):0.01648,(sp626887:0.04309,((sp1137280:0.04511,(((sp564117:0.02084,(sp330734:0.00792,sp1046724:0.00683):0.03803):0.01697,(sp1874317:0.01485,((sp1479237:0.00641,sp443152:0.00828):0.0172,(sp1658765:0.00786,(sp375760:0.01152,(sp1849167:0.00258,sp225937:0.00282):0.00394):0.00391):0.0026):0.00335):0.00414):0.01022,(((sp1288826:0.01054,sp379482:0.00448):0.0045,(sp135739:0.02862,sp930118:0.02936):0.00425):0.00491,((sp351348:0.00393,sp1122197:0.01616):0.00249,((sp1305731:0.0194,sp1749259:0.00403):0.00331,sp1119533:0.0076):0.00426):0.00915):0.00291):0.00402):0.00519,(sp650891:0.01578,sp430453:0.01394):0.01933):0.00756):0.00695):0.04324):0.03855):0.04705,((sp1123228:0.14463,(sp698738:0.09216,(sp1122615:0.04592,(sp187493:0.04079,sp484498:0.04037):0.01623):0.03765):0.06628):0.03189,(((((sp717774:0.02755,sp1561206:0.04953):0.01365,(sp1792290:0.01496,((sp1122206:0.00379,sp400668:0.00147):0.01579,((sp1561203:0.00264,sp491952:0.00382):0.01835,(sp1208321:0.00777,sp1122207:0.01217):0.01434):0.00835):0.012):0.01868):0.00982,(sp1806668:0.01498,(sp295068:0.0085,sp1137284:0.01182):0.01009):0.01201):0.10924,((sp64969:0.04413,(sp1122616:0.03029,(sp966:0.01843,sp1122617:0.02009):0.01706):0.01538):0.05135,(((sp553385:0.01145,(sp1716176:0.00488,sp28258:0.00292):0.00483):0.06269,((((sp290398:0.00754,sp223900:0.0231):0.03616,(sp284577:0.03733,(((sp1166948:0.02109,sp1121939:0.0132):0.00615,((sp48727:0.00621,sp1883416:0.00632):0.02199,((((sp1816686:0.01381,((sp77097:0.00404,(sp115561:0.00641,(sp574966:0.01297,(((sp1962264:0.01273,sp999141:0.00451):0.00707,sp232346:5.4E-4):0.00326,((sp1635257:0.00415,(sp1610576:0.00277,(sp1504981:0.00428,sp1072583:0.0039):0.00771):0.00274):0.01399,sp1118153:0.00842):0.00359):0.00299):0.0039):0.00184):0.00948,((sp1479235:0.00624,((sp1975722:0.00152,sp416874:0.00178):0.00803,sp416873:0.01153):0.00291):0.00209,sp1666906:0.00513):0.01079):0.00653):0.00572,(sp29571:0.0253,sp1238190:0.04707):0.026):0.02323,((((sp650850:0.01237,(sp416872:0.01268,sp1480675:0.00726):0.00272):0.00713,sp463301:0.03635):0.00843,(sp42565:0.01808,sp2746:0.02683):0.00843):0.00461,((sp579478:0.01378,(sp1178482:0.01091,sp44933:0.01306):0.0186):0.01007,sp1121940:0.0633):0.0058):0.0048):0.00457,((sp419597:0.01412,sp1121941:0.0315):0.01391,(sp376427:0.02166,(sp590061:0.02284,sp507626:0.01927):0.01597):0.00726):0.00326):0.01376):0.00517):0.00585,sp574349:0.05067):0.00618):0.00885):0.00586,((sp1783518:0.02148,sp1446475:0.02743):0.01003,((sp1121943:0.00936,sp442341:0.00955):0.01107,(sp119000:0.02174,(sp1121942:0.00851,sp1471202:0.02838):0.01386):0.00795):0.0068):0.01049):0.01038,(((sp402385:0.02711,sp1122139:0.03194):0.04056,(sp1336245:0.04338,sp376489:0.03939):0.04057):0.03217,(sp1492922:0.01301,(sp1882734:0.00566,(sp1928762:0.01581,sp404433:0.00773):0.00395):0.02037):0.02704):0.01589):0.01973):0.06082,(sp64971:0.07333,(sp197479:0.07351,(sp1122252:0.04318,(sp1122209:0.02802,(sp1122212:0.00692,sp1122211:0.01771):0.04649):0.01896):0.05549):0.0406):0.01903):0.02047):0.04704):0.01731,(sp1121103:0.12442,((sp1278309:0.0348,sp355243:0.03133):0.0688,(((sp1122202:0.00473,(sp1821621:0.00152,sp1714300:0.00329):0.01134):0.0739,(sp1330036:0.10811,(sp1572645:0.05622,(sp619304:0.04375,(sp1122599:0.01849,sp1045558:0.01279):0.0147):0.04187):0.01961):0.02761):0.01579,((sp1122200:0.05943,(sp1806669:0.01205,sp1806670:0.02043):0.05732):0.01702,((sp267850:0.04112,sp1229521:0.04126):0.05127,((sp49186:0.02892,sp1122198:0.02591):0.03156,(sp1122201:0.03136,sp1232683:0.02915):0.02997):0.01466):0.03817):0.01453):0.01852):0.03941):0.02421):0.01269):0.01957):0.01799,(((sp570277:0.0423,(sp1698521:0.02341,sp305900:0.01996):0.04787):0.08331,(((((sp472181:0.02073,sp254161:0.01637):0.01147,sp1434072:0.04067):0.00605,((sp1002526:0.02168,(sp797277:0.01468,(sp1461581:0.00772,sp653930:0.00567):0.00689):0.0048):0.01926,(sp487184:0.01664,sp1323663:0.0313):0.0079):0.00623):0.00521,(sp1720063:0.0297,sp1931241:0.01813):0.00716):0.04251,(sp1429083:0.05615,((sp1123021:0.01869,sp1680762:0.12037):0.01311,(((((sp137658:0.01303,(sp322710:0.01122,(sp1328314:0.00675,sp170623:0.00683):0.00568):0.0151):0.00596,(sp1292027:0.01755,((sp1499686:0.01578,(sp1333856:0.00382,(sp1109445:0.00161,sp271420:0.00194):0.00529):0.00674):0.00833,((sp440512:0.00168,((sp316:0.00555,(sp32042:0.0082,sp1123519:0.01769):0.00781):0.00844,sp477228:0.002):0.00944):0.00717,(sp1439940:0.0054,(sp1218352:0.00739,(sp1212548:0.00128,(sp1196835:0.00132,sp644801:0.00195):8.6E-4):0.00277):0.00245):0.00546):0.00252):0.0099):0.00965):0.00756,(((sp208964:0.01745,(sp53408:0.00973,((sp198616:0.00783,sp428992:0.00713):0.00344,(sp1301098:0.00857,(sp1294143:0.0017,(sp46680:8.0E-4,sp1226994:0.00176):0.00166):0.00902):0.0019):0.00947):0.01497):0.01526,(sp243924:0.02476,(sp237610:0.00315,sp47885:0.00391):0.02817):0.01744):0.02233,(((sp1149133:0.00692,(sp1608357:0.00329,((sp1856685:0.00452,(sp1245471:0.00364,sp1123020:0.00619):0.00282):0.00124,sp53412:0.00425):0.00219):0.00451):0.00957,(sp1333854:0.01168,sp319939:0.02245):0.00585):0.00749,((sp1007099:0.02217,sp364197:0.04176):0.00929,((sp1796033:0.01267,(sp1523503:0.00494,sp43263:0.00853):0.0069):0.01378,(((sp301:0.0035,(sp741155:0.00212,sp658457:0.01199):0.00296):0.00225,(sp1001585:0.00302,sp399739:0.00281):0.00132):0.0129,(((((sp289370:0.0022,(sp29435:0.00284,(sp640205:0.00515,sp47880:0.00292):0.00235):0.00614):0.0096,sp743720:0.00404):0.00281,sp1220495:0.00225):0.0085,(((sp556533:0.01218,(sp1395571:0.01508,((sp543360:0.00784,(sp425504:0.01592,(sp53406:0.00598,sp592361:0.0011):0.00336):0.00384):0.00811,(sp289003:0.00396,sp1930532:0.01202):0.00655):0.00456):0.00581):0.00469,(sp686578:0.02968,sp437900:0.008):0.01041):0.00316,sp1729724:0.03103):0.00301):0.00765,(sp522492:0.0187,(((sp1215104:0.00717,((sp69328:0.00417,(sp303:0.01425,(sp76759:0.00918,((sp384676:0.00293,sp1388763:0.00391):0.00616,(sp157783:0.01183,(sp1215114:0.00649,sp157782:0.00154):0.00248):0.00213):0.00337):0.003):0.01038):8.0E-4,(sp1495066:0.00607,((sp1215115:0.00174,(sp1331671:0.00108,sp1736226:0.0012):0.0026):0.0033,(sp1661046:0.00187,sp390235:0.00242):9.1E-4):0.00127):0.0045):0.01137):0.00766,(sp1292031:0.00259,sp237609:0.00147):0.00605):0.00539,(((((sp226910:0.0065,(sp50340:0.00985,(sp46677:0.00228,sp707248:0.00134):0.00192):0.0028):0.00548,((sp1380376:0.00673,((sp1981685:0.00519,sp1207075:0.00164):5.4E-4,((sp1699310:0.00176,(sp1736221:0.00426,sp95300:5.4E-4):0.00102):5.2E-4,((sp1855729:5.5E-4,sp395600:0.00151):5.4E-4,sp1659194:0.00384):5.6E-4):0.00177):0.00128):0.00119,((sp205922:0.00656,(sp1981676:0.01079,sp1981712:0.02148):0.00791):0.0021,sp198620:0.00473):0.00211):0.00169):7.5E-4,(sp47879:5.5E-4,(sp1699309:0.00152,sp1881017:0.00177):0.0025):0.00418):0.00371,(((((sp1221522:0.00249,sp1853130:0.00105):0.00101,((sp104087:5.5E-4,sp1148509:0.00426):5.6E-4,(sp1488328:0.00276,sp1628833:0.00103):0.00176):8.1E-4):0.00323,(sp1761898:0.00363,(sp1674920:0.00201,(sp1198317:0.00219,(sp1282356:0.00114,sp1470593:0.00139):0.00128):0.00307):0.00672):0.00258):0.0041,(sp1563157:0.00426,(sp1907766:0.00153,(sp47884:0.00443,(sp1211112:0.00244,(sp1608994:0.00517,(sp296:0.00237,sp122355:0.00215):0.00154):0.00254):0.00192):0.00155):0.00135):0.00763):5.0E-4,(sp1608996:0.01046,(((((sp587753:0.00405,(sp1397282:9.9E-4,(sp1124983:5.5E-4,(sp1763882:7.3E-4,sp658630:0.00182):0.00176):0.00321):0.00236):0.00453,sp294:0.0112):0.00338,(sp46679:0.00316,(sp219572:0.00282,sp651740:0.00122):0.00645):0.00529):0.00218,sp1960827:0.00534):0.00177,(sp216142:0.01207,((((sp1190415:0.00195,(sp1940241:8.7E-4,sp33069:0.0024):5.0E-4):0.00107,(((sp129140:0.00123,sp1357279:0.00281):5.5E-4,((sp83964:0.00329,sp205918:0.00177):5.5E-4,sp103796:0.00176):5.8E-4):6.8E-4,(sp158627:0.00805,sp317:0.00727):0.00254):0.00424):0.00296,(sp1441629:0.0035,sp1028989:0.02111):0.00224):0.00415,(sp1566248:0.0035,(sp1943632:0.00411,sp89065:0.00126):0.00183):0.00476):0.00397):0.00739):0.00142):0.00973):0.00261):0.01089,(sp1229486:0.00318,sp1179778:0.00201):0.00913):0.00597):0.00871):0.01893):0.00848):0.0113):0.01257):0.00322):0.00309):0.00371):0.00498,(sp706570:0.03092,(sp1392877:0.01189,(sp1245526:0.01029,sp915471:0.02001):0.00569):0.02248):0.00735):0.00637,(sp1697053:0.0439,(sp521719:0.01051,sp1671662:0.01116):0.04043):0.04429):0.00543):0.02489):0.01998):0.07748):0.02571,((sp1768907:0.05,(sp1249552:0.02618,sp1524254:0.0543):0.01944):0.14885,(((sp876044:0.08532,((sp565045:0.07171,sp745014:0.0688):0.05363,((sp930806:0.05414,sp1121937:0.05567):0.01447,(sp1265313:0.0651,(sp314285:0.01629,sp566466:0.01954):0.04617):0.02595):0.01496):0.01774):0.04852,((sp1122224:0.03723,(sp1470434:0.05869,sp1620392:0.0403):0.01445):0.06476,(sp1121374:0.0636,(sp247633:0.04842,sp716816:0.03495):0.03774):0.0531):0.01674):0.03171,((((sp1117647:0.0766,((sp498211:0.02694,((sp1134474:0.00543,sp1945512:0.00323):0.00704,(sp529823:0.01761,(sp1622269:0.00851,sp1209072:0.0183):0.00584):0.00286):0.02045):0.06135,((sp1122194:0.02238,sp1381596:0.01734):0.0506,(sp1121921:0.02957,(sp679259:0.0083,sp863921:0.0266):0.02719):0.03637):0.01236):0.02352):0.01376,((sp62101:0.12499,(sp203122:0.06183,(sp1286364:0.05941,((sp377629:0.0019,sp1056820:0.00693):0.03374,(sp1304903:0.04015,(sp1895005:0.02818,sp1304902:0.04656):0.01604):0.01317):0.01834):0.0157):0.02028):0.02298,sp1513270:0.10474):0.02015):0.01441,((sp1785091:0.01055,(sp1453501:0.00279,(sp1042377:0.00273,sp260552:0.00626):0.00654):0.00669):0.01781,(sp252514:0.02455,((sp658219:0.019,(sp1685377:0.01208,sp1769779:0.00749):0.00876):0.0124,(sp494016:0.0114,sp658218:0.00502):0.00532):0.00428):0.01169):0.07327):0.03096,(sp1415778:0.09049,(sp1655625:0.04941,(sp1411685:0.00987,sp314287:0.00878):0.04553):0.0944):0.05542):0.01989):0.02897):0.0263):0.01333):0.02023):0.02447,((sp1732023:0.49953,(sp1007119:0.38495,sp1811643:0.43422):0.06543):0.04374,(sp91844:0.13358,sp1206109:0.22711):0.53675):0.04431):0.02112):0.03336,((((sp1125411:0.01888,sp1811594:0.01914):0.07302,(sp1615892:0.11028,((sp412965:0.07268,sp413404:0.04909):0.04939,(sp1303921:0.05818,(sp1705394:0.05476,sp655186:0.03771):0.01093):0.01345):0.01591):0.0344):0.25132,(sp364032:0.1263,(((sp748650:0.01992,(sp717772:0.01032,sp717773:0.01698):0.00721):0.03922,(sp406020:0.06155,sp1123517:0.04485):0.01831):0.06669,((sp1123515:0.03868,(sp1123514:0.07534,(sp1123518:0.01558,sp90814:0.02845):0.01978):0.02772):0.03229,((sp1168067:0.03284,sp90813:0.03255):0.02842,((sp1685380:0.01008,sp1123516:0.02094):0.07666,(sp1805397:0.05073,(sp1775636:0.02858,sp317025:0.02214):0.00918):0.0094):0.02001):0.03912):0.03363):0.06091):0.10336):0.05593,((sp1089439:0.1092,(sp1542390:0.04629,((sp594679:0.02164,sp1385420:0.01529):0.02357,(((sp263:0.00817,sp676032:0.00492):0.00284,(sp475375:0.01287,(sp1086726:0.02327,sp1981171:0.02015):0.00399):0.00446):0.01261,((sp28110:0.0112,sp573569:0.01138):0.00779,(sp573570:0.01899,sp1547445:0.02706):0.00555):0.00995):0.01679):0.02381):0.14094):0.1682,sp1238:0.23782):0.02564):0.02396):0.01564,((sp437022:0.17247,(sp1895767:0.10994,sp295108:0.09982):0.07161):0.21642,((((sp1798272:0.12283,(sp1798280:0.08188,(sp1798281:0.07284,sp1798275:0.11742):0.01966):0.04313):0.1612,(sp1797697:0.20826,(sp777:0.08052,(sp325775:0.26461,sp1592897:0.06377):0.04311):0.07951):0.07269):0.10324,((sp1798271:0.36637,sp1798274:0.22246):0.08734,((sp1156986:0.11511,(sp1225476:0.04155,sp59196:0.07234):0.08018):0.21294,(sp1798283:0.17072,(sp1798277:0.12823,sp1798288:0.1385):0.07539):0.13329):0.03368):0.02227):0.03175,(sp1798568:0.20306,(sp45065:0.12677,((((sp1750561:0.03971,((sp45066:0.0098,(sp28085:0.0062,((sp28087:0.00255,sp450:0.0053):0.0035,sp45074:0.0046):0.00121):0.00554):0.01768,(sp1122170:0.02075,((sp40335:0.01113,(sp28082:0.00766,(sp447:0.00423,sp45071:0.00844):0.00161):0.00132):0.00487,(sp464:0.0143,(sp1094715:0.01195,(sp460:0.00773,(sp947033:0.01282,sp28084:0.00616):0.00269):0.00336):0.00326):0.00247):0.00402):0.00679):0.01699):0.01521,((sp1212491:0.03745,(sp66969:0.04247,(sp446:0.00441,(sp91892:0.00195,sp91890:0.00222):0.00372):0.02524):0.02069):0.00614,(sp1122169:0.01941,(sp45076:0.02377,(sp45072:0.00779,sp39962:0.00661):0.00613):0.00885):0.01064):0.0107):0.04083,sp454:0.10192):0.02225,(((sp45068:0.10688,sp1268635:0.05661):0.01857,sp45056:0.07011):0.03053,(((sp1034943:0.03651,((sp45070:0.01012,sp1212489:0.01115):0.01837,(sp451:0.01239,sp466:0.01355):0.02629):0.01033):0.01123,(sp453:0.0384,(((sp45067:0.02896,sp456:0.04457):0.01397,(sp455:0.02018,sp449:0.01791):0.01029):0.00673,sp29422:0.02064):0.02495):0.00808):0.01782,((sp45073:0.01355,sp28083:0.01558):0.06641,((sp458:0.00815,sp448:0.0087):0.04384,sp452:0.06913):0.01458):0.00924):0.02255):0.00839):0.02254):0.04946):0.20045):0.02117):0.03315):0.02759,((((((sp395493:0.01991,sp319938:0.02311):0.11449,(sp40754:0.12498,sp1827136:0.14451):0.03672):0.08286,sp1400863:0.2133):0.02531,(sp1810504:0.33839,(sp1934255:0.24536,(sp1469245:0.02133,sp1725326:0.01708):0.25611):0.03747):0.03229):0.02092,(((sp1703406:0.14012,sp415747:0.1415):0.04287,(sp1918948:0.17062,(sp1748243:0.13644,sp1752213:0.16163):0.0415):0.0171):0.01978,(((sp392484:0.03479,(sp1026882:0.00556,sp45496:0.0064):0.02574):0.01919,(sp1286106:0.03748,(sp754477:0.05518,(sp291169:0.00975,sp754476:0.00961):0.0333):0.01365):0.01406):0.16278,(sp472759:0.03989,(sp105559:0.01834,sp323261:0.01858):0.06243):0.14028):0.06291):0.0129):0.0119,((((((sp1415780:0.17902,(sp1415779:0.15401,((sp1076937:0.07753,(sp489703:0.04218,(sp1123261:0.02226,(sp1123256:0.00611,sp1123257:0.00696):0.01877):0.02023):0.05134):0.04228,((sp1172194:0.04582,sp490188:0.04182):0.0708,(sp1122604:0.06837,sp1122603:0.10427):0.06296):0.03234):0.03386):0.07543):0.08105,(sp1317117:0.2132,(sp1304275:0.07034,sp1033802:0.05441):0.18239):0.03737):0.06918,((sp1852620:0.07958,sp1548547:0.08552):0.09584,(sp1703405:0.17538,sp465721:0.22603):0.0262):0.06969):0.02413,((((((sp1300342:0.05559,(sp578942:0.01583,sp1895867:0.02028):0.07275):0.0355,(sp1895869:0.07479,sp1123073:0.11568):0.019):0.01794,(((sp345309:0.01763,((sp1798239:0.00739,(sp1502760:0.00572,(sp1440763:0.01556,(sp1500890:0.00537,sp1500893:0.00764):0.00679):0.01001):0.00693):0.00416,sp1502758:0.00895):0.00592):0.04189,(sp767434:0.05775,(((sp582702:0.02619,(((sp1163408:0.00217,sp1736542:0.00238):0.01515,((((sp1945856:0.00471,((sp1945855:0.00293,(sp1945858:0.00772,sp1881037:0.0135):0.00334):0.00366,sp1945860:0.00439):0.00557):0.00853,(sp1945859:0.0116,sp1895822:0.01545):0.00706):0.0039,sp1163407:0.01728):0.00226,((sp1524463:0.01069,(sp666685:0.00366,(sp416169:0.00406,sp1076525:0.0058):0.00479):0.00447):0.00812,sp1736406:0.00668):0.00512):0.00561):0.02363,(sp1895823:0.01405,sp1945854:0.01439):0.02179):0.01038):0.00862,((sp529704:0.02629,sp1736407:0.0178):0.00914,(sp1379159:0.0209,(sp500610:0.02704,sp1855292:0.01749):0.00792):0.01104):0.00558):0.00738,(sp1234364:0.00175,sp445710:0.00356):0.02926):0.01068):0.01401):0.06401,(sp1895868:0.11471,sp993689:0.10536):0.02153):0.03127):0.03455,(((((((sp913325:0.01793,((sp1122188:0.01438,(sp1199154:0.03915,sp1122185:0.02521):0.02853):0.00888,sp1385515:0.07361):0.01262):0.03033,((sp1385517:0.04276,(sp1736549:0.03553,sp1298861:0.06815):0.01231):0.00816,((sp1736568:0.00397,sp1736612:0.00265):0.01268,((sp69:0.01579,sp1286308:0.01051):0.01022,(sp84531:0.01118,(sp262324:0.00418,sp435897:0.011):0.00418):0.00616):0.00982):0.01654):0.00646):0.01684,sp1300345:0.0486):0.01444,(((sp213588:0.05631,sp1123377:0.03631):0.03563,sp1604334:0.07682):0.01546,(sp1122183:0.05138,(((sp1247514:0.03009,sp1442599:0.02461):0.02525,(sp935863:0.04743,sp1896164:0.06503):0.01369):0.01312,(sp1547516:0.01966,sp1732019:0.02918):0.03832):0.01356):0.02008):0.01009):0.00973,(((sp344882:0.03167,(sp428993:0.02624,((sp1881044:0.00182,sp1736574:0.00298):0.00159,(sp1881042:0.00276,(sp1736576:0.00438,sp128785:0.00623):0.00554):0.00149):0.01993):0.01174):0.00798,(sp1855303:0.03993,(sp1045855:0.01734,sp1881043:0.00994):0.03804):0.01079):0.01593,((((sp743721:0.01476,sp935851:0.01451):0.01303,sp935566:0.00755):0.00922,sp314722:0.01545):0.03665,((((sp48664:0.01772,((sp340:0.00572,(sp339:0.00358,(sp1736270:7.8E-4,sp90270:0.00103):0.00548):0.00252):0.00172,(sp56449:0.00319,((sp1843581:0.00304,(((sp1219375:0.00227,sp1843580:7.8E-4):0.00253,sp1885902:0.00177):0.00143,(sp56460:0.00189,sp1736275:0.00647):0.00109):0.00237):6.8E-4,((sp56459:0.00102,sp64187:0.00855):5.4E-4,(sp325777:0.00198,(sp1437877:0.00118,sp456327:0.0021):8.0E-4):0.00253):7.0E-4):6.0E-4):0.00331):0.003):0.02783,((sp1210005:0.00554,(sp1904944:0.00498,(sp1904462:0.02268,sp216778:0.00718):0.00428):0.0055):0.01697,((sp266128:0.01078,sp336566:0.01228):0.04199,((sp659018:0.01152,(sp83617:0.01495,sp128780:0.00899):0.00642):0.01194,(sp391008:0.02155,sp40324:0.0142):0.01011):0.00404):0.00736):0.01495):0.01191,(sp56458:0.00493,(sp487909:0.01779,(sp29447:0.0076,sp1583099:0.00412):0.00823):0.00461):0.02169):0.0088,(sp1720302:0.03355,(sp698414:0.05017,sp1444770:0.03513):0.10482):0.01165):0.01162):0.01395):0.01505):0.04509,(sp1123253:0.10693,((sp1121013:0.04094,(sp1384056:0.03073,(sp1121014:0.03182,(sp1660089:0.01658,sp1384054:0.01469):0.005):0.00913):0.00796):0.02116,(sp1798290:0.05157,sp1121015:0.03404):0.03381):0.0318):0.02417):0.02712,(sp1660170:0.03873,sp265719:0.05528):0.04779):0.04061):0.13487,(sp1579979:0.15999,sp1792834:0.25763):0.04736):0.0487,((sp1839807:0.10303,sp246195:0.13165):0.17496,(sp1111732:0.15005,(sp1157986:0.01886,sp400946:0.0432):0.10964):0.12579):0.05074):0.03131):0.01722,((sp1123397:0.21632,(((sp187272:0.10118,sp349124:0.1723):0.03679,(sp314278:0.14041,(sp1121016:0.09481,(sp1260251:0.05009,sp1335757:0.07062):0.07841):0.02492):0.04687):0.0323,sp406100:0.14309):0.063):0.0314,((((sp998674:0.17141,((sp870187:0.02475,(sp525918:0.01009,sp1123401:0.01857):0.03506):0.05715,(sp1123400:0.10927,(sp92487:0.05753,sp1123399:0.0691):0.03301):0.02254):0.05826):0.06663,(sp1766620:0.10945,(sp1860122:0.04692,sp555778:0.05068):0.08895):0.15679):0.0304,((sp160660:0.07646,sp1765967:0.0856):0.08878,((sp1255043:0.08357,((sp545276:0.01671,(sp748658:0.00563,(sp1265495:7.9E-4,sp252474:0.00285):0.00464):0.01307):0.05779,((((sp1158150:0.00523,(sp1266911:0.00295,sp396595:0.00338):0.00516):0.00181,sp1158183:0.00922):0.00304,sp545264:0.00865):0.02152,((sp1158762:0.00768,sp1158146:0.01604):0.00949,((sp1266914:0.00617,((sp106634:0.00329,sp1158165:0.00996):0.01102,sp1158144:0.01646):0.00548):0.00298,(sp1158182:0.00566,sp1158168:0.00461):0.00201):0.00674):0.01563):0.03276):0.07011):0.09141,(sp765914:0.11573,(((sp867345:0.00549,sp519989:0.01004):0.04282,(sp233100:0.08909,(sp195064:0.05336,(sp1396821:0.00777,(sp1442136:0.002,sp1354791:0.00308):0.00599):0.03997):0.0179):0.01759):0.04933,(sp396588:0.04022,(sp713586:0.02501,sp108003:0.02499):0.0217):0.04288):0.01448):0.03102):0.02971):0.03572):0.02144,(sp1868282:0.20506,sp1611323:0.20454):0.06801):0.02117):0.01311):0.02075,(((sp1198232:0.03875,sp1284675:0.04594):0.20227,((sp1420851:0.1271,((sp1978759:0.04036,sp857087:0.03814):0.07184,(sp675511:0.07098,(sp686340:0.06746,sp697282:0.05331):0.04001):0.01543):0.02976):0.08407,((sp1495050:0.09327,(sp243233:0.13641,(sp675524:0.07994,sp1528100:0.12657):0.03281):0.01894):0.06919,(sp1798802:0.07827,sp1283300:0.09565):0.10746):0.02375):0.02951):0.06004,((((sp1818881:0.0342,sp1655433:0.03921):0.09338,(sp1918949:0.12627,(sp1111735:0.01902,sp1543721:0.0173):0.07219):0.05084):0.01933,(((sp765912:0.09201,(sp1431688:0.11268,sp631362:0.11575):0.04069):0.02079,(sp765909:0.10062,((sp1058:0.01111,sp768671:0.01106):0.05817,(sp765911:0.05298,(sp572477:0.04645,(sp1249627:0.02239,sp765913:0.02453):0.027):0.02172):0.01568):0.02204):0.03085):0.06225,sp1662188:0.22089):0.03405):0.01467,((sp2340:0.13047,(sp1076588:0.10622,(sp1248727:0.08546,sp1978339:0.07749):0.032):0.02577):0.02329,sp1798308:0.16864):0.01561):0.05701):0.02593):0.01148):0.02004):0.06226,((sp1561003:0.08029,sp1561004:0.10215):0.29763,((((((sp1805218:0.14922,(((sp292415:0.02371,((sp1123393:0.0058,sp1895858:0.00377):0.00923,(sp36861:0.03895,(((sp1895859:0.05157,sp1895860:0.00196):0.04437,sp1895861:0.0016):0.00771,sp1123392:0.00848):0.01212):0.00458):0.00617):0.01308,sp1895862:0.03905):0.01118,sp1660144:0.02834):0.09517):0.04229,(sp1789004:0.07786,(sp1356306:0.01652,sp1356299:0.02203):0.05583):0.09475):0.01621,((((sp1163617:0.00799,sp1632857:0.00342):0.10572,(((sp1778481:0.04114,(((((sp1101195:0.01821,(sp492660:0.01169,(sp1122236:0.00622,(sp1112274:0.01486,sp1112273:0.00519):0.00778):0.00612):0.05645):0.02128,(sp1978760:0.01192,(sp1101193:0.00875,sp1165096:0.0102):0.00839):0.0322):0.01567,(sp666681:0.03354,(sp1506585:0.01678,(sp583345:0.00564,(sp1132855:0.0013,sp1502770:5.2E-4):0.00411):0.00954):0.01061):0.02613):0.03075,sp1581557:0.12525):0.02363,sp1581680:0.04617):0.01315):0.00804,(sp582744:0.02648,(sp1848038:0.04121,(sp265072:0.02643,sp1236959:0.0207):0.02039):0.03854):0.01475):0.03106,sp1848039:0.04898):0.0861):0.02332,((sp1798254:0.03873,(sp395494:0.00101,sp1798243:0.00127):0.08052):0.03899,(sp580332:0.06834,(sp1188319:0.01519,sp1485544:0.00965):0.05455):0.01352):0.08585):0.015,((sp1797492:0.13912,sp1797503:0.1737):0.05466,((sp1855339:0.09117,(((sp1855333:0.04022,sp1895901:0.04439):0.00813,(sp200120:0.0296,((sp1855338:0.00335,(sp1266925:0.00129,sp136547:0.00279):0.00367):0.02579,(sp35799:0.02504,sp1855340:0.01983):0.00905):0.00927):0.00781):0.00353,((sp1231:0.00988,sp323848:0.01597):0.03731,sp1233:0.0416):0.0068):0.02105):0.03027,(((sp133724:0.02711,sp44574:0.03329):0.10216,(sp44576:0.06246,(sp916:0.05738,sp915:0.04814):0.06744):0.07288):0.0505,(sp44575:0.07475,((sp52441:0.05102,(sp917:0.05996,sp133720:0.04582):0.03592):0.06659,(sp1881054:0.06174,(sp1827381:0.12271,(sp261292:0.048,(sp153948:0.08441,sp42354:0.06081):0.01546):0.00932):0.01377):0.03439):0.03773):0.03371):0.03986):0.05716):0.02524):0.01503):0.01637,((sp1123354:0.00857,sp876478:0.00919):0.17762,(((sp1123487:0.09318,(((sp1637998:0.00285,sp76114:0.00579):0.026,(sp748247:0.03446,(sp198107:0.00775,(sp1261621:0.00881,sp34027:0.00902):0.00265):0.01199):0.01118):0.02839,(sp418699:0.03513,(sp1792543:0.06343,((sp96773:0.02219,(sp303682:0.01357,sp85643:0.01657):0.00942):0.00591,(sp1348657:0.03481,(sp1134435:0.01015,(sp1219356:0.01414,sp1123367:0.01076):0.00482):0.00326):0.00821):0.01165):0.01627):0.01482):0.03784):0.0192,(sp1691980:0.07983,((sp1121035:0.05293,((sp1121032:0.01489,sp418702:0.01318):0.01921,(sp1304883:0.01747,(sp159087:0.01461,sp281362:0.02316):0.01001):0.0053):0.0448):0.03386,((sp1895689:0.03005,((sp1860102:0.02373,sp522306:0.02461):0.01735,(sp1454004:0.05596,(sp1453999:0.03926,(sp1454001:0.02212,sp1454005:0.01853):0.02842):0.01403):0.00747):0.06435):0.03991,sp640081:0.061):0.01526):0.01403):0.04097):0.01609,(((sp1842540:0.02439,(sp1119528:0.00577,(sp1346290:0.02491,(sp999628:0.0041,sp1000565:0.00372):0.00762):0.00502):0.01441):0.0949,(sp1223802:0.04472,sp1565605:0.08592):0.05952):0.01817,sp1805051:0.16124):0.01607):0.01466):0.03891):0.02,(((((sp887898:0.15035,(sp1469502:0.12548,((sp1834205:0.04786,(sp1637509:0.00143,sp469610:0.00136):0.04667):0.07483,(sp1506471:0.14322,(sp1852381:0.07918,(sp742823:0.03876,(sp1203554:0.07071,sp762967:0.02629):0.0161):0.04654):0.02271):0.03608):0.07634):0.04437):0.02466,(sp1813033:0.16766,(sp1895729:0.06042,(((((sp1231391:0.0471,(sp1007105:0.01712,sp658167:0.035):0.01107):0.01448,((sp1437824:0.01472,sp1349760:0.02502):0.036,(sp232846:0.00283,sp511:0.00495):0.07066):0.01566):0.02031,((sp1424334:0.00881,sp1247726:0.01084):0.03398,(((sp1720297:0.0498,(sp1008459:0.01033,sp937774:0.01676):0.06868):0.01862,(sp1121118:0.08636,(sp1122619:0.02855,sp90245:0.02347):0.07538):0.03105):0.01157,sp1072685:0.0981):0.0223):0.03726):0.014,(sp1851544:0.04594,((sp1746199:0.03693,((sp1697043:0.01124,sp463025:0.00877):0.00994,(sp1416803:0.01276,sp463014:0.01557):0.0044):0.01912):0.0104,((((((sp1397275:0.00519,((sp1736602:0.00524,(sp477184:0.00458,sp85698:0.00534):0.00339):0.00321,(sp1156919:0.00433,(sp72556:8.4E-4,sp1806484:0.00445):0.0013):0.00283):0.00146):0.00388,sp762376:0.00362):0.00355,sp32002:0.0034):0.0182,(sp935860:0.01745,(sp935861:0.00805,sp94624:0.00522):0.00391):0.00976):0.0037,(sp520:0.02275,(sp123899:0.02291,(sp521:0.01153,(sp103855:0.00474,sp35814:0.01189):0.00531):0.00627):0.0078):0.00591):0.0052,((sp463040:0.01065,sp288768:0.01678):0.01293,sp1159870:0.04233):0.01057):0.00741):0.01137):0.01143):0.00683,(((sp1208923:0.03036,(sp1208920:0.02529,sp1208921:0.01666):0.00968):0.07448,(sp1208919:0.05761,sp1208918:0.08427):0.05498):0.11666,sp206506:0.06101):0.00998):0.0319):0.06929):0.01846):0.01503,(sp1523428:0.13404,(((sp339866:0.00714,(sp75379:0.01365,sp926:0.00715):0.00553):0.09013,(sp1158292:0.03831,sp1158291:0.04924):0.07556):0.05361,(((sp1349753:0.0477,sp413882:0.04098):0.01533,(((((sp864051:0.05918,((sp987059:0.0059,sp983917:0.00393):0.03398,(sp1523421:0.00836,sp1523424:0.01219):0.03869):0.02524):0.02129,sp1121030:0.04805):0.00648,(((sp1881035:0.00669,sp1349774:0.00621):0.00975,(sp1855305:0.01167,sp76731:0.00706):0.00888):0.03017,(sp1768242:0.04983,(sp1736464:0.00436,(sp1736580:0.00647,(sp1736434:0.00219,sp1736430:0.00235):0.00788):0.00729):0.02962):0.01461):0.03015):0.0096,(sp391953:0.05482,(sp1547922:0.05402,((sp1736511:0.0053,(sp1500264:0.00337,sp1500262:0.00813):0.00565):0.03388,((sp946333:0.01037,sp1736433:0.01242):0.02864,(sp1500261:0.02985,(sp1736528:0.03875,sp1686064:0.03583):0.01811):0.0082):0.00952):0.01603):0.02137):0.01117):0.01225,(((sp1797552:0.02153,(sp1797568:0.02454,sp1538295:0.01625):0.00872):0.04738,(sp34103:0.04108,sp395495:0.05423):0.02942):0.0172,sp1736441:0.05232):0.01315):0.01818):0.03428,(sp946483:0.20281,((((((sp1349793:0.00677,(sp1349791:0.01537,(sp1736490:0.00184,sp1842537:0.00266):0.01159):0.0106):0.005,((sp1797551:0.00951,sp1763535:0.0356):0.00618,sp1945864:0.01737):0.0054):0.01444,((sp1349752:0.00272,sp1882399:0.00303):0.02091,sp795665:0.04439):0.00914):0.0327,((sp307486:0.01837,sp1101373:0.01477):0.07148,(sp1797572:0.04705,(sp1458426:0.01615,(sp1458427:0.00694,(sp1458425:0.00153,sp1531963:0.01625):0.00486):0.00962):0.05638):0.01181):0.01298):0.0127,sp1408164:0.11053):0.01981,(((sp1121117:0.02322,sp1121116:0.0363):0.05887,(sp1122623:0.06516,((((((sp1945857:0.03999,((sp1484693:0.03577,(sp338969:0.03073,(sp1797574:0.02573,(sp28066:0.00928,(sp192843:0.00491,sp81479:0.01776):0.00275):0.01406):0.01508):0.01884):0.01032,(sp1349763:0.0164,(sp1458275:0.00533,sp887062:0.00408):0.04288):0.01669):0.01094):0.00607,((sp1736316:0.01813,(sp1736315:0.00667,sp1736318:0.00759):0.02667):0.02359,(sp1855285:0.04797,sp1842727:0.01578):0.01414):0.01279):0.00614,(sp1944133:0.01844,((sp1321608:0.00956,(sp1305734:0.01967,(sp1855300:0.00753,(sp365044:0.00499,(sp866564:0.00214,sp1504672:0.00455):0.00543):0.01817):0.00803):0.00632):0.0053,(sp1855301:0.00796,sp296591:0.00492):0.00738):0.00913):0.04394):0.01065,(((sp1123504:0.02161,(sp1907403:0.00371,sp433924:0.00387):0.02116):0.02411,((sp1321611:0.01056,sp1882825:0.01194):0.01231,((((sp1882828:0.01395,sp1855728:0.01707):0.00478,sp1882774:0.00804):0.00191,sp1380385:0.00668):0.00575,(((((sp1566271:0.00612,sp595537:0.0034):0.004,(sp1736530:0.00608,(((sp1566270:0.00755,sp1884386:0.00594):0.00231,sp1855317:0.00993):0.00172,sp436515:0.01086):0.0036):0.00176):0.0032,(sp543728:0.00366,sp1882826:0.00788):0.00416):0.00523,((sp1566275:0.00244,sp1157708:0.00762):0.00706,sp34073:0.01372):0.00692):0.00496,sp1795631:0.02838):0.00895):0.00979):0.00965):0.01753,(sp1450524:0.04471,(sp94132:0.02062,((sp1736365:0.02575,sp1298913:0.02655):0.0092,sp365046:0.02434):0.01165):0.01143):0.01791):0.00876):0.00957,(((((((sp1527607:0.04315,(sp535289:0.01086,(sp596153:0.01649,sp1268622:0.01493):0.00524):0.00475):0.00513,(sp343013:0.01943,(sp1121348:0.02065,sp1895727:0.02194):0.04844):0.00548):0.00739,((sp80866:0.02205,sp1121349:0.02655):0.0105,((sp673548:0.01233,sp688245:0.02381):0.00742,(sp1219032:0.02297,(sp225992:0.02016,sp225991:0.01772):0.01647):0.00883):0.00937):0.02434):0.00638,sp1223521:0.04151):0.01066,(sp180197:0.03233,sp1123255:0.03537):0.0197):0.00412,(((sp391735:0.04378,((((((sp1736237:0.00433,sp1736296:0.00319):0.00551,(sp1276755:0.01583,sp999386:0.00333):0.00121):0.00543,sp1842533:0.00614):0.00145,sp1797549:0.00261):0.00175,((sp512030:0.00331,(sp1736590:6.9E-4,(sp1736565:5.5E-4,sp358220:0.00274):0.00113):0.00157):0.00203,sp1813946:0.00551):8.0E-4):0.00234,(sp1276756:0.00132,sp592050:0.00393):0.00627):0.00253):0.0039,sp80878:0.00988):0.01044,((sp1177982:0.00786,sp1736280:0.01424):0.00791,(sp187868:0.01499,(sp397945:0.01335,sp32040:0.03663):0.01133):0.00276):0.00564):0.00629):0.01124,sp1265504:0.0377):0.00969):0.00669,((sp1100719:0.0047,sp1678129:0.00463):0.02502,(sp1597955:0.00476,(sp1293045:0.00446,(((sp1678128:0.0066,sp1100720:0.00965):0.00269,sp1100705:0.00506):0.00265,(sp1100700:0.03122,sp1100721:0.00604):0.00312):0.00416):0.003):0.029):0.01816):0.01412):0.01297):0.01177,(sp1610491:0.05355,sp1122156:0.04608):0.06712):0.01058):0.01695):0.04145):0.03771):0.05485):0.02138):0.01393,((((((sp1095769:0.03292,(sp1736487:0.02136,sp709839:0.01876):0.01286):0.0102,((((sp180195:0.01318,(sp1443993:0.00738,(sp1144319:0.00209,(sp1262470:0.00744,sp346179:0.00159):0.00248):0.00556):0.00633):0.00955,(sp1144342:0.02004,(sp211589:0.00647,((sp864073:0.00152,(sp1175306:0.00223,(sp964:8.8E-4,sp1078773:0.00513):0.00108):0.00173):0.00822,sp92645:0.00939):0.00651):0.00569):0.02073):0.01167,sp669502:0.36161):0.00904,((sp279058:0.00538,(sp1801619:0.00228,(sp158899:0.00288,(sp1798195:0.00146,sp1801620:0.0018):0.00374):0.00207):0.0042):0.03068,(sp1797562:0.03005,((sp1809410:0.00418,(sp1752206:0.01199,sp204773:0.00953):0.01261):0.00499,sp375286:0.00768):0.02145):0.00845):0.01049):0.01633):0.00918,(((sp1678028:0.01177,(sp1121480:0.00469,(sp1736518:0.00129,(sp1736471:0.00232,sp1884368:0.0017):7.6E-4):0.00241):0.02217):0.01069,(sp1881045:0.02748,((sp1261617:0.00764,sp1736266:0.00388):0.00628,(sp1881039:0.00488,(sp551987:0.00513,sp1855289:0.00508):0.00521):0.00907):0.01498):0.00665):0.01031,((sp1955422:0.0089,((sp47229:0.01374,((sp1502852:0.00497,sp1549812:0.0036):0.011,sp1164594:0.01825):0.00582):0.00591,sp1122215:0.01082):0.00663):0.00789,((sp1881046:0.00352,(sp1141883:0.0027,sp1736455:0.00353):0.00345):0.00935,(sp1707785:0.01301,sp1500894:0.0185):0.00561):0.0131):0.01921):0.04389):0.01828,(sp556268:0.02313,sp847:0.02039):0.08599):0.05577,((((((sp1761774:0.0044,sp882378:0.00454):0.03182,(((sp28095:0.0071,sp41899:0.00839):0.01219,(sp1740163:0.00937,(((((sp101571:0.0034,sp1503054:0.00288):0.00169,sp1192124:0.01108):0.00222,(sp292:0.003,sp95486:0.00526):0.00321):0.00653,sp87883:0.00407):0.00467,((sp1637837:0.00519,sp342113:0.00735):0.00159,sp28450:0.00391):0.00179):0.00222):0.00443):0.01603,((sp28094:0.01883,sp667632:0.01528):0.00918,(((((sp420953:0.01535,((((((sp1500897:0.00806,(sp134537:0.00142,sp1804984:0.00261):0.00149):5.3E-4,sp1218078:0.00494):5.5E-4,(sp1462439:0.00561,(sp266265:0.0018,(sp1500263:7.4E-4,sp398527:0.00429):0.00212):0.00137):8.0E-4):5.7E-4,((sp1247936:0.00429,(sp1515439:0.00398,(sp640511:0.00163,(sp1399968:0.0037,(sp157910:0.00189,sp754502:0.0055):0.00157):0.00185):0.00268):0.00928):0.00401,(sp169427:0.0041,(sp948106:0.00251,(sp1169143:0.00196,((sp944435:5.4E-4,(sp640512:7.8E-4,sp1229205:0.0033):5.5E-4):0.0045,sp1678678:0.00205):0.00151):0.00131):0.00244):0.00174):0.0022):0.00469,sp83784:0.0115):0.00235,sp60549:0.00534):0.00533):0.00731,(sp667676:0.00506,(sp391038:0.00436,(sp169430:0.00496,sp75105:0.00234):0.00425):0.00313):0.00565):0.00219,sp1926494:0.01515):0.00359,((sp758793:0.00766,((sp1777144:0.00351,sp1055526:0.01599):0.00261,((sp1071679:0.00515,sp1777133:0.00413):0.0049,((((sp1777136:0.00585,sp1855726:0.00302):0.00211,(sp1777143:0.01088,(sp1777138:0.00307,(sp1777137:0.00216,sp1777140:0.00589):0.00174):0.00168):9.2E-4):0.00266,(sp1458357:0.00334,(sp1399969:0.00206,sp1777141:0.00522):0.00151):0.0021):0.00211,sp1777134:0.00317):0.0019):0.00298):0.00216):0.00957,(sp326475:0.00484,(sp326474:0.00283,((sp1736287:0.00151,sp1795043:0.0025):0.00295,(sp1232866:0.00482,sp196367:0.00345):0.00284):0.01887):0.00738):0.00959):0.01634):0.00364,(((sp416944:0.00353,((sp1218074:0.00589,sp1218076:0.00841):0.00346,(sp1038869:0.00363,(((sp1218075:0.00695,sp92647:0.00823):0.00486,sp159450:0.00354):0.00318,sp392320:0.00542):0.00158):0.00287):0.00283):0.0128,sp416943:0.0113):0.00385,sp1268285:0.01577):0.00466):0.00585):0.00487):0.01533):0.01329,(sp1070319:0.18326,sp1562701:0.08246):0.04694):0.0114,(sp1770053:0.07765,sp28092:0.10155):0.0421):0.0191,(sp445709:0.0445,((sp1895806:0.00802,(sp93221:0.0036,(sp93220:0.00289,(sp1286093:0.00207,sp93218:0.00272):0.00285):9.7E-4):0.00196):0.00102,((sp1586708:0.00197,(sp93222:0.00399,(sp656178:5.5E-4,sp656179:5.8E-4):0.00101):0.00115):0.0051,sp93219:0.01575):0.00274):0.0479):0.02164):0.02119,((sp1938817:0.06562,(sp1743169:0.0074,((sp1743168:0.00855,((sp452638:0.01378,sp1743159:0.00152):0.00132,((sp1819727:0.00299,sp576611:0.00301):0.00253,sp1743167:0.00203):0.0022):0.002):0.00631,(sp1743157:0.00283,(sp1801989:8.7E-4,(sp1835254:0.00476,sp543913:5.4E-4):9.3E-4):0.00475):0.00268):0.00508):0.06552):0.07022,(sp795666:0.06846,((sp190721:0.00466,(sp428406:0.00123,(sp329:0.00191,sp402626:8.8E-4):9.9E-4):0.00573):0.03411,((sp68895:0.00581,sp1619952:0.00675):0.01212,(((sp82633:0.00619,(sp1761899:0.00966,(sp266264:0.00737,sp1217718:0.00321):0.00254):0.00433):0.00791,(sp876364:0.00985,sp1267562:0.01621):0.00354):0.0029,((sp1855314:0.01085,sp1855315:0.00273):0.00444,(sp1539142:0.00487,(sp264198:0.00691,((sp1349762:0.00467,sp1796606:0.00339):0.00119,(sp106590:0.00655,sp1366050:0.00434):0.00206):0.00386):0.00315):0.0034):0.00303):0.00519):0.02421):0.01323):0.02684):0.02406):0.0364):0.0217,(sp1121388:0.01736,sp764842:0.02192):0.1197):0.01602):0.05613,(sp1904640:0.13872,sp1690485:0.11813):0.06473):0.02177):0.01545,(((((((sp1689272:0.00936,sp1123499:0.02715):0.05535,((sp1123296:0.042,(sp1196094:0.03431,sp1775559:0.02574):0.0227):0.02541,(((((sp194197:0.0089,(sp326522:0.02545,(sp326523:0.0063,sp1931274:0.00841):0.01374):0.00681):0.00997,(sp487:0.00726,((sp641149:0.01175,(sp1715052:0.00252,(sp490:7.9E-4,(sp1739348:0.00201,sp546266:0.00177):5.5E-4):5.5E-4):0.00163):0.00546,((sp486:0.00421,sp933280:0.00332):0.0036,(sp546267:0.00483,(sp122586:0.00361,sp485:0.00839):0.00157):0.00888):0.00232):0.00402):0.02137):0.0084,sp28091:0.03118):0.00742,sp1470200:0.02365):0.00767,((((sp1121351:0.02467,sp1121352:0.01204):0.01876,(sp629741:0.05648,(sp1120980:0.02053,((sp1522312:0.00904,sp504:0.00911):0.0066,(sp641147:0.01199,sp888741:0.02552):0.006):0.00647):0.00677):0.01434):0.0175,(sp1032488:0.03449,(sp1739535:0.00647,sp1795832:0.00467):0.06808):0.02008):0.00677,(sp493:0.0252,(sp1030841:0.00757,sp1692264:0.00593):0.01027):0.03373):0.01072):0.02186):0.02657):0.08949,(sp1229489:0.0563,(sp375574:0.04322,((sp332411:0.02308,((sp1628193:0.00278,sp394935:0.00358):0.01741,(sp686831:0.00744,sp536:0.01293):0.01031):0.00966):0.01994,((sp990370:0.00342,(sp1123014:9.2E-4,sp279714:0.0032):0.00588):0.02437,sp1122928:0.05348):0.01193):0.00811):0.01296):0.00994):0.01188,sp1452487:0.04113):0.0314,(sp1938604:0.05446,(sp1121004:0.06394,(sp557598:0.03893,sp1122240:0.04504):0.03253):0.01494):0.01317):0.0335,((sp1121278:0.02862,sp1121279:0.03175):0.0652,(sp83765:0.05947,((sp1236179:0.06945,(sp1121274:0.03652,sp1121375:0.05824):0.03116):0.01571,((sp529086:0.01695,sp1121275:0.01534):0.04298,(sp857265:0.0532,((sp1906741:0.04676,(sp1120999:0.02082,sp1121001:0.02663):0.01863):0.01414,sp1121280:0.07095):0.00802):0.01628):0.01019):0.01474):0.03886):0.02093):0.03442,sp1122158:0.11471):0.04133):0.05377):0.09648):0.03087):0.03572):0.09203):0.10705,sp1805333:0.37271):0.03616):0.03257):0.09049,(sp1795556:0.40253,(sp1817770:0.14185,sp1817772:0.14225):0.27605):0.1971):0.03793,(((((sp862908:0.09709,(sp1353529:0.10936,(sp1201290:0.09267,sp1201288:0.09792):0.06309):0.03039):0.43737,(sp708132:0.1544,sp1513793:0.11568):0.32953):0.11364,(((sp1797856:0.35856,sp1797862:0.37388):0.09867,(sp1797881:0.42272,(sp1797887:0.25632,sp1797805:0.2344):0.1942):0.04637):0.10082,((sp1797403:0.13497,(sp1797383:0.08081,(sp1797386:0.08206,sp1797404:0.06228):0.02327):0.05664):0.31263,(sp1752195:0.21038,((sp959:0.03649,sp765869:0.0601):0.04373,(sp1752196:0.17614,(sp1184267:0.09307,sp1797389:0.06783):0.0926):0.02972):0.14556):0.3004):0.06415):0.02277):0.02876,(((sp404589:0.04609,sp290397:0.04915):0.15663,(((sp83449:0.02655,(sp1920190:0.00321,sp48:0.00576):0.02342):0.03195,((sp394096:0.02785,(sp378806:0.01165,sp41:0.01087):0.02917):0.02465,(sp1144275:0.03974,((sp1297742:0.00759,(sp246197:0.02672,sp483219:0.00797):0.0033):0.02653,(sp1278073:0.03562,sp1334629:0.0092):0.01647):0.01781):0.02129):0.01916):0.19087,sp1391653:0.19731):0.03663):0.15587,((sp927083:0.23398,(sp1970199:0.30583,(((sp1192034:0.02657,sp52:0.03828):0.07117,(sp448385:0.00507,(sp1254432:0.00731,sp888845:0.12146):0.02634):0.04968):0.11034,(sp1882918:0.25919,(sp1895795:0.11354,sp1391654:0.04629):0.07355):0.09008):0.03985):0.08428):0.11285,(sp502025:0.33268,(sp54:0.19139,sp391625:0.21621):0.19302):0.08338):0.06221):0.07483):0.04382,(sp1125863:0.40644,(((sp706587:0.35035,sp1918507:0.40243):0.08886,(((sp1621989:0.31314,((sp206665:0.04288,sp1635258:0.08032):0.12447,((sp698827:0.07823,sp1121413:0.06033):0.15914,(((sp485915:0.17083,sp1121433:0.2247):0.07791,((sp617002:0.04736,(sp617001:0.03068,(sp935942:0.00908,sp159290:0.00983):0.01562):0.02655):0.19645,(((sp1121442:0.13187,sp1121406:0.12613):0.0586,((sp690850:0.18554,(sp1307759:0.16109,(sp941449:0.04892,sp1121439:0.06139):0.07457):0.05755):0.04953,((sp1121441:0.07322,((sp1121447:0.02386,(sp1519643:0.02787,sp246191:0.01329):0.01076):0.02899,(sp526222:0.02977,(sp1121467:0.02172,sp1121451:0.02254):0.0082):0.01775):0.04719):0.09564,((sp1805130:0.15042,sp1121440:0.10716):0.03716,((sp1121456:0.05552,sp1121449:0.04403):0.09234,((sp1121459:0.04544,sp1294020:0.03996):0.07107,((sp117209:0.01508,sp641491:0.02136):0.02943,(sp1322246:0.0399,sp643562:0.06041):0.01496):0.06082):0.04447):0.02207):0.05228):0.04349):0.02055):0.01265,((sp1121453:0.13187,((((sp596152:0.00387,sp644968:0.00416):0.02764,(sp1121438:0.03022,sp596151:0.03663):0.01064):0.04396,(sp573370:0.02376,(sp1304872:0.01663,(sp1562888:0.00559,sp1844708:0.00392):0.01245):0.01421):0.02457):0.11209,sp1121462:0.15053):0.02823):0.0552,(((sp207559:0.10194,((((sp563192:0.05937,sp1234378:0.17559):0.04309,((sp901:0.0377,(sp44742:0.0273,(sp571438:0.04817,(sp525146:0.03949,sp1121445:0.03315):0.01166):0.01086):0.0263):0.07913,sp1903261:0.13229):0.02033):0.02897,(sp1121455:0.17207,sp1121443:0.1551):0.04965):0.02089,(sp573059:0.07769,(sp883:0.00744,sp298701:0.00702):0.0607):0.02573):0.03254):0.02719,(sp1560234:0.00293,(sp1121457:0.0131,sp876:0.01297):0.02461):0.12337):0.05396,sp1121448:0.21805):0.0291):0.01675):0.03927):0.03622):0.02216,(sp1592317:0.17246,(sp888061:0.05242,(sp1121411:0.02982,(sp52560:0.0023,(sp525897:0.0083,sp52561:0.00193):0.00246):0.03958):0.02901):0.16016):0.05185):0.03156):0.04911):0.19594):0.04216,(sp1156395:0.26673,((sp1123371:0.03134,(sp1795632:0.01348,sp667014:0.01526):0.02351):0.10304,(sp999894:0.09341,(sp1653476:0.18523,(sp161156:0.06275,(sp795359:0.08066,(sp1123373:0.00363,sp1123372:0.01311):0.10102):0.04605):0.04376):0.13825):0.06099):0.17983):0.06571):0.04402,((sp39841:0.17703,(sp335543:0.17451,(sp1121391:0.02403,sp1121390:0.04138):0.08727):0.05343):0.14122,((((sp1703401:0.16153,((sp1121404:0.13026,sp577650:0.1234):0.12475,(sp1121409:0.1382,(sp177439:0.12589,(sp1167006:0.17224,(sp91360:0.11594,sp1121416:0.10846):0.0243):0.03722):0.03443):0.09264):0.0473):0.04479,(sp589865:0.23455,sp1805129:0.23462):0.02987):0.20632,(((sp1429043:0.17926,sp644282:0.17212):0.16402,sp880072:0.31895):0.04007,(sp1869302:0.29247,((sp439235:0.00477,sp1121393:0.00624):0.24326,((((((((sp1121396:0.01725,sp879212:0.01824):0.08006,(sp1265505:0.04696,sp1304886:0.09965):0.01336):0.01264,(sp90732:0.04087,sp1797914:0.11206):0.02999):0.12269,(sp177437:0.11452,(sp1246637:0.10161,sp1121400:0.08141):0.0218):0.02872):0.13151,sp419481:0.17774):0.03559,sp1304885:0.21038):0.0325,sp96561:0.26648):0.02548,((sp897:0.14577,(sp933262:0.1813,sp1971629:0.13006):0.03449):0.01855,(sp1185843:0.15995,sp1121394:0.2644):0.02946):0.03733):0.03354):0.06308):0.08979):0.01943):0.02316,(sp1935136:0.28601,(sp1121399:0.17517,sp1805128:0.21673):0.1733):0.05912):0.023):0.02185):0.03421):0.02144,((sp909663:0.48097,((sp1797820:0.11574,sp1797846:0.10595):0.31453,(sp1797814:0.12117,sp1797818:0.19292):0.27146):0.04581):0.03393,(((((sp115783:0.0164,sp398767:0.01193):0.09564,(sp338966:0.08373,sp1798317:0.07647):0.04226):0.07008,((sp35554:0.04776,sp269799:0.05227):0.0538,(sp1266765:0.11272,((sp443143:0.01647,(sp443144:0.00387,sp404380:0.00176):0.01908):0.07507,(sp316067:0.0376,sp351605:0.02505):0.04164):0.04082):0.01963):0.03434):0.11893,((sp1121918:0.12863,(sp1122189:0.04113,((sp37625:0.04518,sp1742866:0.06841):0.03118,sp1122946:0.04896):0.02583):0.03516):0.08529,(sp392333:0.15513,(sp1969733:0.13321,(sp57664:0.1799,((sp1801896:0.08003,(sp1603606:0.09303,sp1823759:0.08775):0.01991):0.02132,(sp1842532:0.09568,(sp29542:0.04061,sp338963:0.02367):0.07562):0.0498):0.01472):0.01712):0.0137):0.0222):0.09289):0.10731,((sp1775673:0.24565,(sp56780:0.16449,(sp1678137:0.20179,(sp1802291:0.07258,sp1805378:0.06331):0.09596):0.0305):0.07128):0.15904,(sp1805125:0.25136,sp1797840:0.29094):0.05777):0.03318):0.02921):0.02231):0.02084):0.01798):0.02572):0.03006):0.05659):0.03804):0.03529,(((((((sp644966:0.02003,sp867903:0.02393):0.25686,(sp28034:0.12063,sp1051632:0.13745):0.20593):0.04984,(sp1671637:0.36056,sp292459:0.2438):0.0379):0.05345,(sp1671640:0.23864,((((sp457570:0.2972,(sp555088:0.19406,sp1671638:0.31126):0.0551):0.05399,((((sp520767:0.1093,(sp555079:0.04587,(sp447595:0.01763,sp520764:0.01516):0.05067):0.03196):0.09074,(sp1671632:0.10827,(sp224999:0.07427,(sp1209989:0.00852,sp1918496:0.00407):0.04074):0.04538):0.08274):0.1169,(sp1120989:0.01286,sp1120990:0.00719):0.20683):0.04608,(sp2741:0.42618,(((((sp1263029:0.32998,((sp1262970:0.17652,sp1262867:0.22745):0.09518,(sp1263026:0.24811,(sp1262797:0.18767,sp1262896:0.154):0.0735):0.0808):0.03836):0.13822,((sp1674848:0.16753,(sp1898207:0.0941,sp1897005:0.10136):0.11384):0.11702,((sp1816678:0.04165,(sp270498:0.03112,(sp1805714:0.01991,(sp1851429:0.00924,sp626937:0.00725):0.01212):0.02219):0.02174):0.20076,(sp1930012:0.11851,sp1930013:0.15655):0.11942):0.03292):0.03134):0.07522,((((sp699246:0.23785,sp1497955:0.34451):0.04827,((sp1674854:0.14058,((sp1392491:0.01864,sp1855400:0.01839):0.06871,(sp1520819:0.10467,(sp1674852:0.00845,(sp1410638:0.01596,sp1520816:0.01957):0.00606):0.13526):0.05438):0.12354):0.08196,sp1671649:0.39231):0.02274):0.15418,((sp1671644:0.13586,(sp1346611:0.07492,sp1671655:0.05407):0.07639):0.06552,((sp398512:0.13702,((sp48256:0.01889,sp1195236:0.01613):0.02246,(sp394503:0.02448,(sp1291050:0.02771,(sp1330534:0.00289,(sp588581:0.00805,sp755731:0.00294):0.00236):0.00751):0.01229):0.02218):0.07834):0.03607,(((sp720554:0.0759,sp509191:0.06176):0.04679,(sp1671645:0.08541,(sp1848158:0.02819,(sp1294263:0.04256,sp203119:0.05204):0.0152):0.02721):0.02827):0.01977,sp1671653:0.14946):0.03593):0.04597):0.04442):0.03472,(((sp1262847:0.12267,sp1262811:0.09464):0.20582,(((sp1262841:0.07177,(sp1262820:0.01442,sp1262815:0.01111):0.06254):0.01973,(sp1262840:0.15892,sp1896986:0.09272):0.08312):0.03102,(sp1262796:0.10273,sp1262810:0.13399):0.02016):0.12513):0.16565,((sp1797683:0.23737,((sp1676155:0.20453,(sp1676156:0.16473,sp1263015:0.18702):0.03935):0.02021,(sp1262966:0.08949,sp1262894:0.17408):0.10264):0.04432):0.08182,(((sp501571:0.06651,(sp1193532:0.01847,sp1408437:0.02084):0.07058):0.10984,(sp1263002:0.20867,((sp1123282:0.15705,(sp1262999:0.07258,sp1263030:0.09351):0.09631):0.05225,(sp1122930:0.13945,(((sp1235797:0.0583,(sp1855299:0.03313,(sp1007096:0.01292,sp693746:0.0241):0.05163):0.0147):0.04928,(sp1897028:0.08563,sp1262992:0.12967):0.02055):0.08165,(((sp1378168:0.06409,(sp1650661:0.03396,(sp552398:0.02698,sp1193534:0.01958):0.01583):0.04098):0.05219,((sp1297617:0.04878,(sp1673721:0.0149,sp292800:0.04937):0.0586):0.01979,(sp411467:0.06349,sp1871015:0.10031):0.01468):0.01526):0.01952,((sp1263001:0.07812,sp1121344:0.08189):0.0373,sp877414:0.22709):0.03298):0.03633):0.04368):0.03939):0.02012):0.05842):0.05468,((sp29343:0.13858,sp663278:0.13845):0.07858,((((sp1627893:0.08615,(sp1650663:0.06363,((sp411471:0.01435,sp745368:0.03222):0.09922,(sp853:0.00312,(sp411483:0.00685,(sp718252:0.00963,sp748224:0.00585):0.00361):0.00632):0.12849):0.0606):0.07584):0.15128,((sp258515:0.14651,((sp1841868:0.12917,sp1211843:0.13092):0.02671,(((sp1520815:0.17778,sp1841867:0.06849):0.0285,(((sp169435:0.05433,(sp1235835:0.04585,sp1720200:0.03921):0.0157):0.07639,(sp1871018:0.12107,sp474960:0.1175):0.02084):0.01521,sp1852383:0.11256):0.01282):0.01824,(sp1262778:0.0404,sp1871035:0.02327):0.15581):0.01251):0.02037):0.02951,sp1882754:0.1614):0.01491):0.01596,(sp1852384:0.14147,(sp1870991:0.09061,sp537013:0.06898):0.08359):0.0366):0.01986,(((sp39492:0.10004,(sp1262878:0.00877,sp1262893:0.0071):0.14314):0.08836,((sp1514668:0.11138,((sp1262953:0.08409,(sp1262954:0.02629,(sp1638786:0.02741,sp411473:0.00647):0.01956):0.02878):0.055,(sp1262965:0.05154,(sp1674843:0.02502,(((sp1265:0.01631,sp1410671:0.04082):0.0155,(sp1336236:0.00764,((sp1410672:0.0084,sp1341157:0.01129):0.00712,sp1384066:0.01481):0.00373):0.00944):0.01046,sp641112:0.02207):0.03394):0.05089):0.03806):0.02835):0.0362,(sp1929998:0.19567,(sp877411:0.07898,(sp1520817:0.07251,(((sp246199:0.01062,(sp697329:0.00682,(sp1264:0.00588,sp1384065:0.00266):0.00448):0.01441):0.05308,(sp1160721:0.04303,sp1410617:0.08944):0.02077):0.06879,(sp244362:0.06491,sp1262963:0.03553):0.05841):0.01185):0.04005):0.0646):0.03118):0.04944):0.05598,((sp1780381:0.15689,((sp1262848:0.09514,((sp1262884:0.05814,(sp1200751:0.08098,sp40518:0.0329):0.01698):0.05728,sp1262890:0.11422):0.03917):0.06266,(sp1572656:0.15883,(((sp1944639:0.04453,sp1673717:0.03352):0.03519,(sp1120746:0.04608,sp1849176:0.10756):0.02235):0.0248,((sp1958780:0.01297,(sp1105031:0.00357,sp1121334:0.0086):0.00826):0.07283,(sp1776382:0.03482,(sp1834198:0.06933,sp1262989:0.06649):0.01561):0.08869):0.01629):0.03144):0.03747):0.04513):0.02776,(((sp1262700:0.04094,sp1262831:0.05714):0.03883,(sp290054:0.0982,(sp1262779:0.05856,(sp1262886:0.00661,sp1263019:0.01087):0.05025):0.02772):0.01622):0.1196,((sp1262959:0.11217,sp1262882:0.12139):0.02071,((sp1671661:0.1061,sp1671652:0.20276):0.02137,(sp1262803:0.11601,sp1262952:0.09268):0.0259):0.02795):0.06025):0.06019):0.02927):0.01908):0.03647):0.06232):0.03193):0.08188):0.03422):0.02633):0.03205,((sp697281:0.24672,(sp937334:0.1068,sp1671658:0.08713):0.1086):0.0502,((((sp1387569:0.01741,(sp632292:0.04214,sp1387555:0.03564):0.04031):0.03037,sp351627:0.01357):0.01528,(((sp632335:0.00385,sp1387557:0.0125):0.00154,(sp608506:0.00473,sp632518:0.00699):0.00362):0.00173,sp521460:0.00698):0.01945):0.27037,((sp1121256:0.07592,sp935948:0.0504):0.15281,((sp580327:0.02632,(sp1094508:0.00484,(sp1930849:0.00274,sp858215:0.00342):0.00408):0.01933):0.11426,(sp273068:0.06539,(sp2325:0.0347,(sp340099:0.00656,(sp1511746:0.01004,sp1350366:0.00216):0.00409):0.01234):0.02988):0.06572):0.09079):0.05813):0.02794):0.03482):0.0153,(((sp1122184:0.10996,sp1734399:0.15632):0.1032,(sp36849:0.17873,((sp1121307:0.12339,(((sp1031288:0.07684,(sp908809:0.06786,sp857293:0.08924):0.05868):0.02157,sp1147123:0.09718):0.01401,sp1403537:0.10915):0.0424):0.11699,(((((((((sp1325933:0.03033,sp1121298:0.03047):0.05461,(sp994573:0.08264,sp398199:0.10751):0.13404):0.01635,((((((sp394958:0.04482,sp119641:0.0345):0.02025,((sp641107:0.01713,(sp225345:0.0151,sp1196322:0.0139):0.01194):0.00465,((sp169679:0.01981,(sp1492:0.0372,sp137838:0.04509):0.01315):0.01044,(sp36745:0.0271,(sp29367:0.0259,(sp1410652:0.00628,sp1520:0.00593):0.01285):0.0049):0.00519):0.02088):0.03813):0.03593,(sp999411:0.07547,(sp1561:0.02786,sp1391647:0.03432):0.01835):0.03248):0.0176,((((sp1504:0.0125,sp1351755:0.01019):0.02454,(sp1805470:0.01933,(sp457396:0.01151,sp1667357:0.02112):0.00697):0.02634):0.01818,(sp545697:0.05965,(sp1499684:0.02845,sp84024:0.01574):0.01687):0.03316):0.03465,sp94869:0.09143):0.01464):0.04927,(sp1121302:0.07267,(sp1267:0.06427,(sp195102:0.04507,(sp1805472:0.06531,sp1347366:0.05746):0.03684):0.02183):0.01933):0.02139):0.0342,(sp1533:0.07714,sp1294142:0.08618):0.01427):0.02119):0.01429,((sp84698:0.06158,sp1121319:0.0512):0.06129,(((sp1499689:0.03732,sp37659:0.10537):0.04992,sp1650662:0.08113):0.01664,sp1529:0.09232):0.01607):0.0125):0.02813,((sp1881060:0.03964,sp1321778:0.05624):0.05648,sp1450648:0.14548):0.01741):0.01797,(((sp1121338:0.10856,(sp1121331:0.13705,sp1121306:0.09352):0.03917):0.05013,(sp1540257:0.13637,(sp1121316:0.15068,((sp929506:0.02701,(sp386415:0.00884,sp1776385:0.01103):0.0254):0.03807,(sp1121305:0.04848,sp36844:0.08057):0.01548):0.04165):0.05031):0.01774):0.01468,(sp1552:0.14319,(sp29341:0.04369,((sp318464:0.02944,sp1499683:0.03017):0.06512,(sp1211817:0.0397,sp1033737:0.04172):0.02391):0.02537):0.04006):0.0403):0.01863):0.00931,((((sp1924269:0.01927,(sp1560217:0.01208,sp1491:0.08557):0.03533):0.03517,sp1622073:0.06686):0.08265,(sp1121326:0.05113,(sp1548:0.00667,sp536227:0.00651):0.04882):0.04659):0.01419,(((sp991791:0.01417,sp84029:0.01645):0.09133,(sp1501:0.07141,((sp86416:0.02779,sp545243:0.02666):0.02585,(sp1121291:0.03078,sp1121293:0.08466):0.03628):0.03857):0.0283):0.03957,(sp573061:0.1376,sp1216932:0.10102):0.05662):0.0254):0.01718):0.02702,(((sp1494:0.0185,sp1513:0.02568):0.09027,(sp1487921:0.07937,(sp1230342:0.03178,sp1410653:0.04233):0.02779):0.01887):0.03319,(sp1121290:0.14284,(sp1519:0.11138,(sp748727:0.08533,sp1534:0.08084):0.02458):0.03543):0.02395):0.01246):0.05456,(sp1041504:0.10502,sp1840217:0.07647):0.26254):0.06517):0.02285):0.05651):0.03086,(((sp445971:0.2625,(sp1120975:0.16568,((sp52689:0.04683,(sp52694:0.01115,sp1068975:0.00677):0.01871):0.07867,(sp1736:0.04527,(sp887929:0.15943,(sp1528:5.5E-4,sp81409:0.00257):0.06611):0.03883):0.04184):0.13438):0.04172):0.11065,(sp59620:0.24037,((sp165185:0.11866,(sp592031:0.30869,((sp1870997:0.16219,(sp936375:0.09458,sp1871012:0.09794):0.02896):0.10117,(((((sp155865:0.13856,(sp1261640:0.05133,sp1161902:0.09868):0.03015):0.06387,sp1776384:0.06199):0.0146,sp1263011:0.09809):0.02208,(sp1520829:0.10195,(sp888727:0.00879,sp883109:0.0113):0.13498):0.02572):0.02167,(sp1321814:0.13676,sp1120998:0.1344):0.03861):0.02352):0.02731):0.10742):0.1309,((sp165186:0.24525,((((((sp33039:0.09057,((sp1121950:0.06226,((sp33038:0.03748,(sp1871020:0.02854,sp1073376:0.03583):0.01836):0.0076,((sp1235792:0.00355,sp97139:0.00654):0.04971,(sp1776045:0.04875,(sp39482:0.01001,sp290055:0.01225):0.01535):0.01016):0.00796):0.01624):0.01283,((((((sp411468:0.02228,(sp1235799:0.04928,sp1235798:0.03228):0.00942):0.00312,((sp88431:0.03324,sp411461:0.03968):0.01328,sp1653435:0.03316):0.00742):0.01207,(sp553973:0.00779,(sp1816694:0.02612,sp658665:0.00296):0.00714):0.02501):0.01228,(sp1519438:0.0031,sp1871021:0.00864):0.06157):0.02253,(sp1745713:0.03255,(sp1632013:0.05447,sp410072:0.03955):0.01436):0.01436):0.00791,(sp658656:0.02881,(sp742723:0.0328,sp1870993:0.01852):0.01408):0.01628):0.00958):0.02725):0.03408,((sp168384:0.07285,sp180332:0.05449):0.03003,(((((sp1907659:0.00199,sp537007:0.00237):0.03661,(sp33035:0.00334,(sp1121114:0.0039,sp1796616:0.00606):0.00369):0.02412):0.03004,(sp1122155:0.04749,sp1123075:0.05657):0.01236):0.01107,(sp1262948:0.04923,((sp1410624:0.10627,(sp1408436:0.00577,sp633697:0.00257):0.11003):0.05277,sp1150298:0.06254):0.01609):0.01799):0.01121,(sp53443:0.0409,(((sp765821:0.03627,sp1816688:0.01942):0.02448,(sp40520:0.02759,sp1262756:0.02044):0.00789):0.01069,sp1410649:0.02512):0.02316):0.03698):0.03349):0.01914):0.0112,((sp1930015:0.16471,(((sp1408322:0.15152,((sp1855374:0.04051,sp1408323:0.04188):0.03229,((sp1408324:0.00732,sp1898203:0.00965):0.03836,sp1410621:0.09223):0.02293):0.05552):0.06445,((sp1798184:0.11216,(sp877406:0.09748,sp1262993:0.06173):0.07578):0.05548,(((sp1410610:0.01138,(((((sp1280671:0.00612,(sp1280681:0.00465,sp1280664:0.00433):0.00351):0.00356,sp1280680:0.00895):0.00224,sp1506994:0.00693):0.00309,sp1280672:0.00669):0.01271,sp1280678:0.01721):0.00425):0.04683,(((sp1520812:0.01364,(sp1280679:0.00281,(sp1280682:0.00506,sp515622:0.00377):0.00155):0.00629):0.00884,((sp1280684:0.00233,((((sp1280666:0.00504,sp1408306:0.0036):0.01574,(sp1410650:0.02032,(sp1280663:0.00143,sp43305:0.00389):0.01382):0.0064):0.0095,sp1408304:0.02209):0.00379,sp1458463:0.19302):0.00893):0.01884,sp1280668:0.00215):0.01933):0.00572,(sp185008:0.00929,(sp1408305:0.00729,sp1520811:0.02003):0.00564):0.00606):0.05456):0.02403,(sp1280685:0.05268,(sp1280686:0.04162,(sp1121131:0.00628,sp831:0.00551):0.02935):0.02346):0.06277):0.05475):0.03594):0.02998,(((sp1410627:0.08509,(sp1408319:0.04095,(sp1520825:0.05978,sp877424:0.05687):0.01838):0.11084):0.0499,sp1200749:0.14059):0.0317,((sp1200747:0.08916,(sp1520826:0.12953,((sp1410630:0.01376,sp1408321:0.02017):0.17853,sp1520828:0.09612):0.02004):0.0147):0.01686,((((sp658086:0.0131,sp1226325:0.01287):0.05473,(sp1897016:0.0365,(sp397291:0.02554,sp1235793:0.03435):0.02101):0.06288):0.01029,((sp1263027:0.03557,sp1235800:0.03758):0.03876,(sp397287:0.05875,sp1469948:0.0484):0.03163):0.0134):0.01103,sp1897037:0.08989):0.01861):0.01073):0.01143):0.0303):0.01652,((sp1120918:0.13808,sp1235802:0.09509):0.0309,(((sp1261634:0.02151,(sp1235790:0.02355,(sp397290:0.02944,sp397288:0.01895):0.01814):0.02251):0.02477,sp1732:0.10697):0.00939,((((((sp1520820:0.0596,sp1855375:0.09131):0.0264,(sp1392494:0.06441,sp626523:0.14495):0.01837):0.0216,((sp1410616:0.00758,(sp46206:0.0085,(sp1280694:0.00499,sp1798186:0.00628):0.00326):0.00267):0.00294,(sp1520801:0.01299,(sp1520802:0.00688,(sp1798168:0.01068,sp185007:0.00862):0.00233):0.00315):0.00304):0.08231):0.04244,((((sp301302:0.03232,(sp1792306:0.02411,(sp1122142:0.00836,sp140626:0.01267):0.03657):0.06186):0.01047,sp515619:0.04847):0.01538,sp1408320:0.07824):0.02581,(sp1261635:0.0328,(sp360807:0.03205,((sp301301:0.12098,sp585394:0.00111):0.02455,sp166486:0.01885):0.01217):0.01791):0.01946):0.0217):0.0126,(sp1042156:0.11856,sp1520827:0.11011):0.04336):0.00648,(sp512314:0.05107,sp39490:0.06125):0.02097):0.00844):0.01301):0.02675):0.01103):0.01689,((((sp1392836:0.12602,(sp1780378:0.06092,sp446043:0.11942):0.03785):0.01843,(((((sp1526:0.17032,sp1262805:0.01828):0.01359,sp1512:0.0304):0.03763,(sp1720194:0.02547,((sp460384:0.04905,sp1697780:0.01728):0.02834,(sp457421:0.01586,(sp1280695:0.00431,sp1834196:0.00412):0.01309):0.00366):0.01506):0.04562):0.00827,((sp154046:0.02466,(sp1805471:0.01309,(sp1163671:0.02818,((sp1304881:0.00817,sp610130:0.00821):0.00512,(sp58134:0.01297,sp1095009:0.01444):0.00439):0.01049):0.00364):0.0193):0.03687,(sp742737:0.03931,sp1697781:0.05505):0.03391):0.00834):0.02308,((sp796942:0.12739,(sp679200:0.17749,((sp887325:0.01334,sp467210:0.00675):0.00717,(sp575593:0.00952,sp936595:0.00702):0.00373):0.08391):0.02252):0.03351,((sp1408311:0.01438,(sp1855343:0.00816,(sp1410612:0.00241,sp1943579:0.00334):0.00691):0.00722):0.05279,(sp608534:0.06645,(sp585501:0.02012,(sp796943:0.00778,sp904296:0.00549):0.02307):0.04295):0.04079):0.15605):0.03214):0.02388):0.01733,((sp1122934:0.12521,sp1619234:0.08691):0.0263,((sp39495:0.11304,(sp1262880:0.04899,(sp411463:0.02328,sp1262881:0.03486):0.04665):0.04959):0.03085,(sp1200721:0.11996,sp1262944:0.08134):0.023):0.02011):0.01339):0.01125,(sp45851:0.125,(sp99656:0.1053,(sp483218:0.06692,(sp1262889:0.02793,(sp39485:0.03271,(sp28052:0.0181,sp1410661:0.03549):0.02134):0.02267):0.05061):0.01372):0.04781):0.02468):0.00872):0.02407,(((sp39488:0.03574,sp1780380:0.03875):0.09359,(sp1261637:0.06058,(sp1232447:0.04114,(sp1261636:0.02473,sp649756:0.02424):0.032):0.05245):0.03737):0.02615,((((sp1262774:0.07389,((sp1410633:0.07862,(sp1458462:0.08153,(sp1392493:0.02171,sp1520823:0.01623):0.11219):0.02383):0.02447,(sp1410622:0.03288,sp42322:0.0278):0.05921):0.06675):0.02448,(sp458253:0.03254,sp411474:0.04799):0.06561):0.03054,(sp1262830:0.0818,sp1262825:0.09955):0.01447):0.03198,sp1410626:0.19148):0.02313):0.02393):0.01075,((((sp1120996:0.06306,((sp1805477:0.02683,(sp66219:0.00363,sp357809:0.0165):0.03015):0.04659,(sp1527:0.04222,(sp1449050:0.01804,(sp1121322:0.01734,sp1121345:0.01441):0.01078):0.03882):0.03022):0.02517):0.02406,(sp1262802:0.08762,(sp290052:0.06908,(sp37658:0.05635,sp29364:0.0545):0.03481):0.00899):0.01114):0.01759,(((sp1262946:0.00329,sp1896984:0.00424):0.03863,(sp1262782:0.04263,(sp1262785:0.00617,sp1703332:0.00306):0.06557):0.01624):0.06398,(((sp1262945:0.03434,sp1336241:0.05118):0.02743,(sp1262777:0.04639,sp1410631:0.12478):0.02629):0.05058,sp1410632:0.11042):0.02255):0.0269):0.01376,sp592026:0.19584):0.02148):0.08939):0.06534,((sp1797681:0.07792,sp1797680:0.119):0.29114,((sp1262888:0.16682,(sp97138:0.05263,((sp991789:0.02377,sp36847:0.02238):0.02868,(sp1697787:0.05486,sp1262998:0.0429):0.01325):0.04668):0.08726):0.07106,(sp1473580:0.13056,((sp1658108:0.07742,(sp1892843:0.06341,(sp1294025:0.04386,sp642492:0.03271):0.03604):0.0409):0.03229,(sp1764958:0.13577,sp1710701:0.11166):0.08298):0.10534):0.03379):0.02905):0.03281):0.0553):0.0307):0.04771):0.02215,((((sp1304284:0.10787,(sp1121476:0.07156,sp1641393:0.09972):0.16445):0.0193,(sp1766203:0.17353,sp1121289:0.11166):0.02804):0.01891,(((sp1503:0.0683,sp39480:0.14788):0.04845,(sp415015:0.06867,(sp1889883:0.05435,(sp1156417:0.00981,(sp1302151:0.01728,sp1323370:0.00361):0.00924):0.12768):0.0487):0.03055):0.03861,(((((sp1123352:0.06714,sp1288971:0.16576):0.02924,sp1686289:0.05911):0.02938,(sp1123404:0.07835,(sp1123403:0.12901,sp1964383:0.08461):0.03298):0.05239):0.02199,(sp1891289:0.14236,(sp1347392:0.11973,(sp1123281:0.05991,sp1871005:0.08031):0.02312):0.02726):0.01784):0.02358,((((sp1723384:0.01006,sp1852391:0.01517):0.21303,(sp1284708:0.11445,sp1852374:0.15996):0.13711):0.0788,(sp1673724:0.28144,(((((sp1095770:0.015,(sp1739525:0.01191,(sp54005:0.00325,sp1756987:0.00675):0.00973):0.01253):0.01038,(sp875454:0.02691,(sp1465756:0.02281,(sp1118057:0.01389,sp1033744:0.01405):0.00518):0.01088):0.00553):0.09042,(sp1776387:0.05467,sp1122949:0.05966):0.05905):0.04327,(((sp575609:0.05311,sp1120995:0.07986):0.02011,((sp1118062:0.0948,sp1912856:0.09561):0.04085,(sp997350:0.00553,sp573058:0.00952):0.09451):0.01226):0.0253,(sp1588750:0.13692,(sp1111134:0.07691,sp862517:0.09949):0.05403):0.01485):0.01472):0.0385,((sp1673726:0.06052,(sp1723382:0.01189,sp879308:0.01065):0.03988):0.10531,(sp755172:0.03649,(sp1776390:0.01063,sp1871017:0.00887):0.04193):0.12929):0.02777):0.05055):0.0438):0.03014,(((((((sp1720199:0.00388,sp1673719:0.00818):0.00681,(sp561177:0.01667,sp1033733:0.01206):0.00923):0.00754,sp1118056:0.004):0.11441,((sp938278:0.06648,(sp938293:0.00808,sp1745712:0.00919):0.05545):0.038,((sp33036:0.02238,(sp879305:0.02955,sp525919:0.02286):0.00976):0.05363,(sp1870984:0.0334,sp525254:0.04527):0.0651):0.02468):0.06359):0.19512,((sp1121947:0.07776,sp883114:0.07187):0.14762,(sp1871025:0.13999,((sp938289:0.03192,(sp1673723:0.01387,sp1852373:0.01281):0.02771):0.10459,(sp1776392:0.11888,(sp1118059:0.01446,sp1686287:0.01122):0.11483):0.05939):0.05037):0.09823):0.05507):0.07766,((sp1588751:0.04306,(sp1588755:0.01196,(sp33033:0.00645,sp767100:0.01145):0.01112):0.03003):0.19253,(sp1689303:0.14855,(sp525282:0.00553,sp1260:0.00654):0.16491):0.03697):0.03702):0.02399,sp1321784:0.21408):0.04639):0.09179):0.04906):0.02173):0.06321,((((sp1775671:0.23002,(sp1120920:0.18834,(sp1895746:0.08514,sp1048380:0.13253):0.08784):0.03405):0.06364,(sp1121266:0.10074,(sp1121301:0.04653,sp36842:0.07021):0.06357):0.0488):0.0355,(sp1658111:0.1032,(sp520762:0.06513,(sp1121919:0.01302,sp1424294:0.01903):0.06349):0.02922):0.05123):0.03106,(((sp159292:0.00453,sp69895:0.00486):0.19325,(((sp393762:0.04001,(sp426128:0.05866,(sp1497:0.01403,sp84022:0.01688):0.03743):0.01224):0.05713,(sp293826:0.11569,sp350688:0.10307):0.02464):0.01164,(sp1120976:0.08775,sp1408422:0.06156):0.03426):0.0325):0.05639,(((sp1123350:0.03318,sp1123349:0.03279):0.07352,((sp500633:0.09479,((sp215200:0.04586,(sp1261:0.04246,(sp72304:0.03995,(sp596315:0.01438,sp1219626:0.01002):0.0285):0.00891):0.01681):0.12215,((sp1121321:0.03497,((sp261299:0.05888,(sp36841:0.01099,sp1577792:0.00808):0.04432):0.03797,((sp1776391:0.03219,((sp1301100:0.03842,sp1720299:0.03836):0.02132,(sp1121325:0.01918,sp1476973:0.03392):0.00828):0.00793):0.02343,(sp1505:0.01663,sp1490:0.05371):0.05384):0.015):0.01319):0.0204,(sp1496:0.02667,sp1392497:0.07739):0.01617):0.02076):0.02354):0.09763,((sp1511:0.09783,sp1123009:0.14437):0.02214,(sp546269:0.16193,(sp1871336:0.12867,(sp796937:0.04935,(sp39498:0.00407,sp864565:0.0039):0.06207):0.04944):0.12312):0.04711):0.08576):0.0272):0.02457,((sp1121328:0.02987,sp29349:0.04242):0.10296,(sp1286171:0.08736,sp1121324:0.06478):0.10578):0.03175):0.07801):0.03546):0.03761):0.03887):0.02586):0.02507):0.05995):0.01784):0.02314):0.01577,(((((sp1384081:0.06703,((sp1123489:0.02244,sp883156:0.02725):0.01392,(sp1123490:0.054,(sp1298594:0.01824,((sp1110546:0.00551,(sp39778:0.00242,(sp879309:0.00659,sp29466:0.00369):0.00192):0.00382):0.02978,sp39777:0.00262):0.00457):0.03375):0.01894):0.01536):0.0855,(((sp1111454:0.04168,(sp706434:0.02195,(sp1852379:0.03166,sp861450:0.08088):0.02737):0.0273):0.01585,((((sp1232428:0.00108,sp1603888:0.00203):0.02197,(sp1064535:0.00226,sp1273103:0.0046):0.00369):0.02208,(((sp699218:0.02119,sp1588748:0.0453):0.04366,sp165188:0.02535):0.00745,sp39029:0.0579):0.00561):0.00999,sp1852378:0.04001):0.01234):0.02164,sp349095:0.0533):0.11325):0.02477,(sp1702287:0.15081,((sp209880:0.02958,sp39950:0.04693):0.05842,(sp888062:0.09109,((sp1588754:0.0719,sp592028:0.04441):0.02566,(sp1262869:0.04245,(sp742743:0.02868,sp1262870:0.03246):0.03074):0.02998):0.02374):0.02583):0.15345):0.0846):0.11788,(((sp1806837:0.06426,(((sp1122216:0.02071,sp1909671:0.01913):0.09025,((sp1240085:0.0043,(sp1200557:0.00432,sp82374:0.00251):0.00234):0.12475,(sp1123243:0.09942,(sp546271:0.08543,(((sp999423:0.01101,sp749551:0.00936):0.00997,((sp638302:0.00561,sp713030:0.00775):0.00957,(sp702437:0.01269,(sp888060:0.00512,((sp1321786:0.00384,sp679201:0.00586):0.00194,((sp712528:0.00446,(sp1127695:0.00522,sp936572:0.00175):0.00174):0.00336,sp1884263:0.00473):0.00119):7.1E-4):0.00535):0.00495):0.0067):0.09853,((sp1123250:0.04916,(sp1410618:0.01735,(sp971:0.0158,sp1280706:0.0195):0.01102):0.02055):0.00701,((sp500635:0.00508,sp187979:0.00294):0.01678,sp1321781:0.05794):0.00792):0.02347):0.03357):0.01571):0.01676):0.03514):0.03791,sp84035:0.0673):0.03136):0.08488,(sp1120985:0.12986,((sp1123285:0.0957,((sp112901:0.02994,((sp112900:0.0314,sp1123288:0.03121):0.01411,sp1337886:0.03384):0.01013):0.07514,(sp1009370:0.11624,sp1794912:0.09024):0.04873):0.01358):0.01779,((sp484770:0.01655,(sp1123291:0.00634,sp1192197:0.00459):0.01471):0.0948,(sp146817:0.09853,(sp1677858:0.04165,sp112903:0.04129):0.04426):0.0391):0.01028):0.02024):0.02428):0.03213,(sp1069080:0.16172,((sp568816:0.06369,(sp1871002:0.0186,(sp1852375:0.00431,(sp1262687:0.00391,sp591001:0.00295):0.0043):0.00818):0.02812):0.10898,((sp1123323:0.01206,sp40841:0.01286):0.13857,(sp626940:0.07329,(sp1262915:0.07417,sp1262914:0.04878):0.01878):0.02412):0.03873):0.07592):0.0648):0.03522):0.11925,(((sp1390249:0.07088,sp766136:0.06413):0.14294,(((((sp1471761:0.10744,sp1522315:0.09697):0.06681,((sp201973:0.09459,(sp1048340:0.09282,(sp1236220:0.08033,sp997346:0.04446):0.0225):0.04734):0.02115,(sp112248:0.16707,((sp46223:0.11108,(sp1173111:0.0415,(sp1811386:0.06938,(sp1329516:0.0372,sp1341151:0.05374):0.00972):0.0251):0.01357):0.01623,((sp1329796:0.08576,(sp1761907:0.00517,sp1882753:0.00144):0.09302):0.02005,sp1123252:0.14071):0.02048):0.01575):0.03284):0.04654):0.0417,((((sp1123284:0.07023,((sp1449983:0.0033,sp1069536:0.00686):0.03116,(sp1395513:0.01575,sp269670:0.0282):0.01074):0.02382):0.09035,(sp1965358:0.15306,(sp1674942:0.05901,sp1123405:0.05414):0.05898):0.02315):0.07163,((((sp472963:0.02871,sp1532552:0.03274):0.05092,(((((sp519424:0.02989,(sp1218173:0.01816,sp79884:0.02116):0.0118):0.02638,(sp1460652:0.08764,(sp1464122:0.06187,(sp79880:0.02229,((sp1246626:0.03528,(sp1460653:0.06244,(sp228576:0.00425,sp1460637:0.00192):0.00874):0.00926):0.00947,sp1649580:0.05863):0.00932):0.01432):0.05183):0.00704):0.00445,(sp398511:0.03614,((sp1236971:0.01404,sp1481928:0.02918):0.02889,((sp1236970:0.009,sp333138:0.00618):0.01115,(sp199441:0.01285,sp1236973:0.02046):0.00851):0.01098):0.01317):0.00684):0.0153,(sp1134413:0.03038,sp272558:0.04258):0.00927):0.01429,(sp79885:0.05591,(sp1912214:0.03297,sp1408424:0.0302):0.01936):0.01802):0.016):0.01717,(((((sp76935:0.03085,sp1601833:0.02902):0.02181,((sp439292:0.02149,sp632773:0.03899):0.05976,(sp1464123:0.10293,(sp1121087:0.06883,sp745820:0.0489):0.05122):0.01301):0.01624):0.04368,(sp79879:0.06342,(sp1503961:0.0452,sp649639:0.04037):0.01083):0.01803):0.01861,sp1121086:0.06437):0.04163,(((sp1123239:0.09907,(sp549003:0.12603,(sp1460635:0.03381,sp1460636:0.05641):0.05775):0.07404):0.04784,((sp1371:0.00357,(sp1122204:0.00185,sp1122203:0.00105):0.02471):0.12759,((sp1121085:0.01902,(sp1884432:0.00958,sp266892:0.03433):0.04818):0.05811,(sp930129:0.01843,(sp568899:0.02303,sp930128:0.08165):0.0291):0.02439):0.0264):0.02035):0.01687,sp1225341:0.11015):0.05796):0.02154):0.04638,(sp157733:0.10645,((sp1196324:0.02855,(sp1684141:0.0126,sp459525:0.01037):0.00948):0.02775,(sp1121091:0.04646,(sp1221500:0.0096,sp255247:0.00744):0.05437):0.03052):0.06302):0.02068):0.02336):0.02375,(((((((sp2756:0.01035,sp1265861:0.04869):0.15546,((sp525367:0.06587,(sp1639:0.04265,(sp202751:6.0E-4,(sp1640:0.00318,sp386043:0.00187):0.00156):0.02554):0.01986):0.00659,((sp1214117:0.01533,(sp1265817:0.00944,sp1265818:0.07969):0.0211):0.02442,(sp1552123:0.00404,(sp1265819:0.00515,(sp1265846:0.00664,(sp1265845:0.00831,sp1497679:0.0016):0.0017):0.00322):0.01345):0.05501):0.01958):0.06377):0.03298,((((((((((sp1423735:0.04289,sp1423738:0.04178):0.07915,(sp1423734:0.10136,(sp1580:0.11368,(sp1231336:0.04119,sp1423792:0.05689):0.05087):0.05925):0.02211):0.03239,((sp1423744:0.13631,(sp1423721:0.08316,((sp1423758:0.02035,(sp324831:0.00216,(sp33959:0.02304,sp1423809:0.00227):0.00197):0.02597):0.01886,(sp713605:0.07729,((sp109790:0.01305,sp1122152:0.00916):0.0376,(((((((sp47770:0.00986,sp1579:0.01433):0.00507,(sp1604:0.00717,sp1033837:0.02228):9.9E-4):0.02119,sp525365:0.01278):0.00241,(sp1423748:0.00305,sp1587:0.00691):0.00436):0.02744,(sp97137:0.02379,((sp1423754:0.01751,sp83683:0.0332):0.00718,(sp1423763:0.02227,(sp1423790:0.02113,sp1423751:0.02139):0.02783):0.00702):0.00937):0.00593):0.01073,(sp1600:0.05617,((sp303541:0.02264,sp1505723:0.02609):0.03011,(sp1545702:0.00854,(sp1218507:0.00881,(sp1218493:0.002,sp1218506:0.00534):0.00317):0.00355):0.01212):0.0239):0.01495):0.02485,(sp1584:0.02075,(sp1293597:0.03005,sp1585:0.01336):0.01214):0.08145):0.02588):0.04579):0.02611):0.13183):0.0389):0.05756,((sp1423811:0.02202,((sp1423775:0.01526,(((((sp1074467:0.01146,sp1423774:0.00922):0.00951,(sp1423770:0.01515,sp993692:0.02636):0.0084):0.00642,(sp392416:0.01211,(sp1423818:0.00313,sp1612:0.00325):0.01923):0.00444):0.0076,(sp1423788:0.01018,sp1423720:0.01812):0.0136):0.03189,(sp1423815:0.02976,sp1007676:0.02088):0.04244):0.01728):0.02679,sp1847728:0.01867):0.01797):0.17754,(sp1218492:0.06817,sp1218508:0.06903):0.10054):0.03932):0.03858):0.01592,(sp81857:0.11394,((sp1291052:0.0753,(sp1423810:0.02473,sp1423783:0.01846):0.07942):0.05009,((sp1423727:0.04821,sp1293598:0.03281):0.03533,(sp1423730:0.0738,(sp1597:0.00731,(sp1582:0.00674,sp47715:0.00526):0.00483):0.05917):0.02065):0.01841):0.0425):0.02319):0.0131,(sp1423747:0.02576,(sp1599:0.00992,(sp1423752:0.01495,sp28038:0.00314):0.00745):0.00879):0.0898):0.02608,(sp1423796:0.08917,(sp375175:0.04904,sp1423726:0.05717):0.01773):0.07684):0.0275,((((((sp1670446:0.05046,(sp942150:0.01613,(sp1400520:0.01847,(sp1589:0.0052,sp1590:0.00235):0.00773):0.02084):0.00981):0.09152,((((sp637971:0.01244,(sp616990:0.03261,(sp1423753:0.00446,sp357278:0.00521):0.01028):0.02311):0.0186,sp216463:0.02314):0.07925,((sp1291743:0.03062,sp1122149:0.02573):0.0426,(sp1302272:0.05332,(sp1423776:0.01661,(sp1423804:0.02291,((sp33960:0.01189,sp240427:0.00817):0.03717,sp1302250:0.0375):0.00779):0.02224):0.02245):0.02763):0.02395):0.02898,(((sp1423781:0.05313,(sp148814:0.00954,sp1218495:0.03366):0.05903):0.05098,(sp1614:0.06779,(sp1423745:0.0772,(sp53444:0.03321,sp714313:0.08941):0.01725):0.05893):0.09768):0.03047,(sp1423802:0.08347,(sp1138822:0.05478,((sp1423739:0.02354,((sp1423795:0.01102,sp797516:0.0095):0.01842,(sp152331:0.01419,(sp1071400:0.00558,(sp1423780:0.00752,sp481719:0.00925):0.00347):0.00995):0.01883):0.01195):0.0112,((sp525318:0.01083,sp1423743:0.03553):0.00885,sp797515:0.02079):0.01457):0.03275):0.02074):0.0285):0.03375):0.02544):0.01466,((sp1114972:0.01516,sp348151:0.02658):0.11325,(((sp1423813:0.02327,sp1423807:0.03518):0.02498,sp1423778:0.10393):0.01002,((sp1335616:0.0234,sp1291742:0.04633):0.03133,(((sp575594:0.03047,sp396268:0.04615):0.02534,(sp1130798:0.05961,((sp1450649:0.00874,sp1613:0.00967):0.02636,(sp1203076:0.03737,sp417373:0.06122):0.01412):0.01319):0.03452):0.03202,((sp1423814:0.01917,sp1423746:0.01763):0.00888,((sp1598:0.0148,sp1926284:0.01091):0.01229,((sp944562:0.00207,(sp525309:0.00406,sp1423794:0.03421):0.0202):0.01079,sp1423782:0.01612):0.01865):0.00641):0.02632):0.09197):0.02743):0.04608):0.01793):0.02564,((((sp114090:0.00927,sp51663:0.02772):0.02292,(sp319653:0.00496,sp54062:0.00868):0.006):0.00589,sp319652:0.01017):0.06415,((sp1254:0.02361,(sp331679:0.03032,sp1255:0.01372):0.01181):0.02436,(sp480391:0.03923,sp187452:0.04433):0.01208):0.0602):0.05759):0.03515,(((sp1616:0.04474,sp1045854:0.03099):0.03982,(((sp1620:0.01733,sp1629:0.01975):0.03604,(sp759620:0.05342,sp1123500:0.06047):0.01491):0.02141,((sp585506:0.00303,((sp46256:0.00894,sp1505725:0.00286):0.01127,sp1631871:0.0226):0.00255):0.03984,(sp1329250:0.05425,(sp137591:0.00649,sp1583:0.0039):0.01144):0.01074):0.01661):0.01462):0.06641,((sp907931:0.05589,((sp1855370:0.04095,((sp220714:0.00913,sp709323:0.00872):0.01718,(sp1631:0.01171,sp283737:0.01297):0.02886):0.03192):0.03662,((sp1245:0.01749,sp33968:0.01212):0.00958,(sp1229758:0.02988,((sp762051:0.01248,sp1229756:0.0162):0.01075,(sp33964:0.01565,sp1246:0.02412):0.00437):0.00647):0.0211):0.01436):0.02088):0.06845,(sp203123:0.04403,sp336988:0.0797):0.19878):0.05013):0.09385):0.02586,(sp1423719:0.12704,(((sp1423729:0.01871,(sp1423759:0.00719,sp1618:0.01692):0.01021):0.03199,(((sp1423725:0.00741,sp1423812:0.00716):0.00638,(sp1423806:0.00921,sp1423731:0.02138):0.00495):0.04271,((sp1133569:0.053,(sp1423750:0.01132,sp1122150:0.01456):0.03281):0.03844,(sp1423777:0.02792,sp1423801:0.01494):0.02844):0.01027):0.01007):0.02647,((sp89059:0.01568,sp449659:0.02944):0.07952,((((sp1601:0.0249,sp1423740:0.04097):0.02173,(sp1624:0.02056,sp1423755:0.03357):0.03107):0.00794,((sp1423820:0.00435,sp1606:0.02466):0.07002,((sp1623:0.01911,sp1069534:0.06425):0.02299,(sp1423724:0.00706,sp1622:0.00503):0.02613):0.01232):0.00995):0.01129,(sp1122146:0.06697,sp1227363:0.07901):0.0255):0.00861):0.02231):0.041):0.02521):0.03327):0.05863,((sp1852364:0.10034,((((sp1234409:0.10246,(sp1408226:0.08745,(sp1987385:0.05183,sp633807:0.08453):0.05539):0.02268):0.03239,((sp1223494:0.02138,(sp1123359:0.0638,sp51669:0.03103):0.01442):0.10562,(((((sp888064:0.02261,sp1140003:0.0237):0.01257,(sp41997:0.02865,sp328396:0.05689):0.01192):0.01187,(sp1353:0.00354,(sp1690244:0.00359,sp1834191:0.00374):0.01285):0.01797):0.00612,(sp1640685:0.03187,(sp317010:0.02834,sp57732:0.03801):0.01103):0.00415):0.00453,((sp160454:0.04563,(sp249189:0.01498,(((sp1218092:0.00861,((sp319970:0.00798,sp71451:0.00902):0.00258,sp160453:0.00462):6.8E-4):0.00372,sp33945:0.00526):8.9E-4,sp71452:0.00198):0.00266):0.02242):0.03525,((((((sp53346:0.01129,sp1987383:0.02596):0.00496,(sp53345:0.00802,(sp1354:0.00471,(sp112904:0.00307,sp150033:0.01599):0.00115):0.00326):0.00111):0.00746,sp1352:0.01719):0.00841,sp1260356:0.02019):0.00831,(sp154621:0.03039,((sp1351:0.02413,(sp762845:0.04912,(sp332950:0.00625,(sp903983:0.00408,(((sp1834189:0.00195,(sp118060:0.00197,((sp1131292:0.00317,(sp903984:0.00522,(sp155618:0.00182,(sp1077675:0.00191,sp155617:0.00305):0.00105):8.7E-4):8.1E-4):0.00151,sp332949:0.00519):0.00194):0.00184):0.0019,sp317735:0.00141):0.00295,sp1834181:0.00661):0.00155):0.00758):0.01574):0.00887):0.00682,sp1385937:0.07425):0.01188):0.00771):0.00689,sp214095:0.03588):0.00449):0.00634):0.007):0.01183):0.04403,sp44008:0.01837):0.02166,sp1121865:0.01704):0.0465):0.01924,(sp263852:0.08419,((sp1811193:0.05935,(((sp1123306:0.06104,((sp1123302:0.04563,(sp1123315:0.01063,sp1123314:0.01829):0.01447):0.01087,(sp1123308:0.0414,((sp1888195:0.01298,((((sp1156433:0.00289,sp1759399:0.00193):0.0051,(sp1114965:0.00262,sp999425:0.00146):0.00899):0.00835,(((sp1303:0.00547,((sp365659:0.00535,(sp1095727:0.00279,(sp171101:0.00315,sp28037:0.0014):5.7E-4):8.4E-4):0.00261,(sp1891914:0.00355,((sp1458253:0.00185,sp861455:0.0015):0.00211,sp1077464:0.00514):8.2E-4):0.00147):0.00145):0.00228,(((sp888746:0.00671,((sp1203590:0.00116,sp1035189:0.00483):6.4E-4,(sp1005705:0.00369,sp68892:0.00439):0.00128):0.00161):0.00384,(sp1739491:0.00458,sp712633:0.00225):0.00224):8.1E-4,sp1852387:0.00487):0.00272):0.00188,sp257758:0.00256):0.01195):0.00748,((sp1123307:0.01584,((sp1328:0.00182,sp862971:0.00556):0.00105,(sp1338:0.00512,sp862969:0.00757):0.00257):0.00943):0.00773,(sp1302:0.00997,((sp1777879:0.01002,(sp388919:0.00232,sp888816:0.00752):0.00553):0.00533,(sp45634:0.00363,(sp1302863:0.00267,sp176090:0.0101):0.00356):0.00551):0.00252):0.00368):0.00492):0.00739):0.01334,(sp1777881:0.03865,(((sp1214166:0.00374,(sp1321372:0.00954,sp1307:0.00283):0.0025):0.01256,((sp1123312:0.01132,(sp1123309:0.01248,sp1608583:0.01892):0.00836):0.00689,sp1676616:0.04697):0.00493):0.00728,(sp1825069:0.00477,(sp1432788:0.00196,(sp1579424:0.00883,sp1326:0.00381):0.00132):0.00308):0.01084):0.00622):0.00527):0.01083):0.0117):0.00944):0.00711,(((sp1308:0.01003,sp1304:0.00666):0.02395,(((sp1123311:0.0121,sp439219:0.00993):0.00877,(((((sp936154:0.01436,((sp218495:0.01058,(sp1856638:0.00501,(sp361101:0.00267,sp873448:0.00338):0.00801):0.00553):0.00708,sp1123301:0.01744):0.0029):0.00348,sp1346:0.01301):0.0062,(sp119224:0.01903,sp764299:0.01229):0.00228):0.00553,(sp1051072:0.01692,(sp1123299:0.01163,(sp482234:0.00589,(sp1314:0.00764,sp759913:0.00127):0.00201):0.00134):0.00219):0.00359):0.01327,(sp764291:0.02304,(sp1123305:0.00665,(sp1123318:0.00111,sp1814128:0.00847):0.00685):0.03074):0.00707):0.0047):0.00489,sp1311:0.02421):0.00453):0.00391,(sp1123298:0.019,(sp1335:0.01272,(sp102684:0.00492,sp315405:0.01204):0.00794):0.01082):0.0051):0.00667):0.00449,((sp873449:0.00954,sp1123317:0.01707):0.02891,((sp1123303:0.02647,(sp764298:0.02999,(sp1309:0.02438,(sp1080071:0.01067,(sp699248:0.00579,(sp1915004:0.00421,sp1123300:0.00887):0.00303):0.00361):0.00814):0.00548):0.01057):0.00682,sp1777880:0.05336):0.00817):0.00402):0.00988):0.07052,(sp1859473:0.0579,((sp1363:0.04244,(sp1291764:0.07472,(sp1359:0.01659,(sp1358:0.00443,sp416870:0.0047):0.00926):0.02207):0.02778):0.06299,((sp1348633:0.00329,(sp1122154:0.00351,sp1215915:0.0027):0.00202):0.00757,(sp1348632:0.01022,sp1364:0.0136):0.00509):0.05705):0.01883):0.03058):0.06014):0.05033):0.03578):0.02572,((((sp1339243:0.06156,sp82801:0.05843):0.0361,((sp142588:0.07965,(sp2748:0.02165,(sp1234679:0.01193,sp1449338:0.01446):0.01454):0.02598):0.05513,((sp545534:0.00461,(sp208596:0.02824,((sp1266845:0.02063,sp1449343:0.0129):0.02131,sp28230:0.01152):0.01057):0.00509):0.05674,(((sp1073423:0.03043,sp1449337:0.01355):0.03134,sp1449342:0.01389):0.00927,sp1564681:0.0184):0.03953):0.0213):0.02204):0.02146,((((sp29394:0.1152,sp883081:0.09784):0.06043,(sp1120978:0.16055,sp1121025:0.12423):0.06553):0.04306,((sp258723:0.02605,(sp1911586:0.00685,sp191770:0.02544):0.02388):0.03516,(sp1798803:0.05528,((sp1130080:0.03327,(sp753702:0.00962,sp426703:0.0088):0.03129):0.02237,(sp1229520:0.02477,(sp426701:0.00274,sp426702:0.00421):0.01661):0.03422):0.02588):0.05464):0.02399):0.05667,(sp1121024:0.07835,sp1122143:0.10522):0.03969):0.08019):0.0285,(((sp140314:0.02979,(sp640938:0.0089,(sp43064:0.00116,(sp157076:0.00893,sp82803:0.00401):0.00179):0.01164):0.01804):0.0482,(sp708126:0.0732,sp1903686:0.04674):0.05945):0.04384,((sp1121105:0.11638,sp1336234:0.11532):0.06169,(sp137733:0.04398,(sp1579343:0.00367,sp638301:0.00436):0.03384):0.07646):0.0262):0.01845):0.04248):0.01202,(((((sp119206:0.00416,sp1581129:0.00339):0.08086,(sp87541:0.07702,(sp1376:0.0021,sp866775:0.00191):0.05345):0.07425):0.03372,(sp371602:0.09714,sp1377:0.08744):0.02145):0.02081,sp128944:0.0818):0.08813,(sp84521:0.13577,(((sp883111:0.06259,(sp883113:0.04848,sp120956:0.07443):0.01296):0.06337,(sp592010:0.086,sp1121925:0.06337):0.03711):0.01827,(sp89093:0.14405,(sp1408438:0.09891,(sp883112:0.10565,sp908337:0.10637):0.01846):0.01492):0.03019):0.01734):0.0918):0.03685):0.07157):0.03981,((((((((sp1280:0.00673,sp985002:0.01458):0.01954,((sp1194526:0.01773,(sp1292:0.00327,sp72758:0.00691):0.00631):0.00389,((sp1283:0.01008,(sp1282:0.01108,sp1313:0.00691):0.00995):0.00536,sp28035:0.02242):0.00586):0.00274):0.01051,(((sp1293:0.02168,((sp29382:0.0277,sp246432:0.02675):0.00484,(sp61015:0.01692,sp1288:0.01243):0.00484):0.00468):0.00566,sp29385:0.01708):0.02064,(sp170573:0.03852,sp29379:0.03577):0.01599):0.01032):0.00891,(sp1286:0.05759,(sp1229783:0.04863,((sp1220551:0.00617,(sp1284:0.00105,sp985762:0.001):0.00302):0.01274,(sp569857:0.02403,(sp1295:0.00831,(sp155085:0.01644,(sp1141106:0.00396,sp283734:0.00244):0.0079):0.00627):0.00821):0.0053):0.02533):0.01335):0.00806):0.02335,(sp45972:0.01094,(sp502393:0.08661,(sp1785995:0.01421,(sp1121914:0.00875,(sp1379:0.00641,(sp562982:0.00711,sp84135:0.00625):0.00289):0.00804):0.00708):0.02571):0.13691):0.10106):0.04868,(sp42858:0.02011,(sp1167632:0.01533,sp150056:0.00757):0.02797):0.04908):0.02565,(sp1855823:0.00185,sp69966:0.00371):0.05578):0.03465,(sp1849491:0.10442,(sp489910:0.15543,((sp1122128:0.03455,(sp1461582:0.01234,(sp586411:0.02763,sp1122129:0.03649):0.00933):0.02664):0.07099,((sp1123231:0.02993,(sp1572701:0.00752,sp576118:0.00951):0.05735):0.04529,(sp930138:0.12148,((sp1123233:0.0052,sp45670:0.00574):0.03416,(sp1123230:0.10464,(sp407035:0.01003,(sp1235755:0.00907,sp1432562:0.00238):0.01309):0.02046):0.01182):0.02523):0.01696):0.02683):0.02523):0.10191):0.02158):0.12389):0.03037,(sp1339252:0.26306,(((((sp1262969:0.05659,sp1263017:0.041):0.23584,(sp1671634:0.20513,sp1262856:0.22928):0.07867):0.08216,(sp1896987:0.29353,((sp1541960:0.10496,sp1541959:0.12999):0.17773,((((sp1408417:0.14347,sp1278311:0.08777):0.10834,sp1802352:0.12714):0.03609,((sp1318466:0.09292,(((sp322098:0.01828,(sp321961:0.01764,sp202462:0.01243):0.0036):0.06393,(sp69896:0.07096,sp980422:0.08926):0.04585):0.12643,(sp37692:0.23405,(sp479893:0.13645,sp1163385:0.42754):0.17101):0.0439):0.21204):0.0397,(sp1408415:0.10107,(sp1408416:0.0681,(sp35623:0.05361,(sp1278304:0.04005,sp441768:0.05533):0.06271):0.04182):0.03799):0.13112):0.03832):0.04505,sp61635:0.17299):0.11304):0.06064):0.03991):0.04733,(((((sp1585974:0.09875,(((sp556262:0.03076,(sp1574263:0.01562,(sp1211844:0.01009,sp1658109:0.00772):0.01255):0.00735):0.04478,(sp1630:0.07895,(sp322505:0.11242,sp31973:0.08293):0.04752):0.07439):0.04098,(sp469597:0.01556,(sp69824:0.01286,(sp1121333:0.01064,sp428126:0.02191):0.00757):0.01014):0.07585):0.0406):0.0367,sp1780379:0.1109):0.11592,(((((sp1834207:0.04652,sp428127:0.05101):0.04342,(sp1871030:0.07621,(sp1123313:0.07107,((sp1235796:0.0427,sp1862672:0.08142):0.03455,(sp1702221:0.09309,(sp1050201:0.09445,sp1917463:0.08571):0.06151):0.02591):0.06049):0.10681):0.03971):0.0251,(sp1034346:0.06798,sp1903263:0.11402):0.0528):0.04077,((sp118967:0.09197,(sp679192:0.10145,(sp877415:0.11497,sp706433:0.06178):0.02446):0.16992):0.03811,(sp1211819:0.00716,(sp1852366:0.00157,sp545696:0.002):0.0032):0.0895):0.05929):0.04505,(sp1648:0.02215,sp1121874:0.00384):0.21657):0.09338):0.04429,((sp1262857:0.20288,(sp1262821:0.42223,(sp1263020:0.25479,sp1262791:0.15552):0.0768):0.12025):0.15241,(((sp315358:0.06807,((sp1276227:0.00732,sp1276229:0.0034):0.07532,(sp1898044:0.02492,(sp2133:0.01407,sp273035:0.01997):0.02471):0.04277):0.02532):0.12424,((sp1276257:0.11325,((sp216942:0.03676,sp216946:0.03763):0.08356,((sp1276220:0.05568,(sp362837:0.02471,sp1276221:0.0292):0.03171):0.01982,(sp1276258:0.05914,(sp216938:0.07277,sp1276246:0.03242):0.01468):0.01986):0.01673):0.05291):0.04744,(sp1941207:0.26443,((sp1399797:0.14688,sp1336238:0.07669):0.05619,(sp1406864:0.11723,((sp1179777:0.01539,sp2103:0.01585):0.0689,(sp1292033:0.05284,(sp1664275:0.00706,sp743967:0.00483):0.02462):0.05251):0.05998):0.02425):0.04199):0.05398):0.1395):0.16619,(sp1749074:0.60905,(((((sp267748:0.31194,(sp2100:0.13383,(sp45361:0.09279,(sp743966:0.11686,(sp1188239:0.05435,(sp907287:0.06594,sp743971:0.06491):0.03967):0.19198):0.0402):0.10627):0.13868):0.03977,(sp272635:0.21154,sp33922:0.288):0.10871):0.04808,(((sp1188235:0.05482,sp2113:0.08993):0.07987,((sp29557:0.12511,(sp1037410:0.07138,sp29561:0.10208):0.03813):0.04202,(sp943945:0.11131,(sp28903:0.00933,(sp1110504:0.00195,sp2110:0.0022):0.01088):0.13523):0.02499):0.01907):0.07254,(sp1267001:0.22482,((sp747682:0.11617,(sp171291:0.11139,(sp1246955:0.07062,sp29555:0.05427):0.07796):0.0622):0.03115,(sp48003:0.07881,sp1034808:0.09705):0.02658):0.03354):0.03894):0.10565):0.04585,(sp29559:0.13188,(sp243272:0.10022,(sp2098:0.13204,(sp1188234:0.04573,sp1188233:0.03941):0.0738):0.03578):0.04546):0.1968):0.22662,((sp505682:0.01417,sp565575:0.00863):0.32425,((sp1006581:0.24781,(sp722438:0.08156,sp243273:0.12242):0.28473):0.14909,sp1318617:0.43699):0.05093):0.25193):0.05993):0.05427):0.10347):0.02706):0.07288,(((sp1262997:0.2032,((sp1262908:0.08779,sp1262855:0.06057):0.10172,(sp1262906:0.13226,sp1262904:0.17958):0.05011):0.02748):0.06938,(sp1262829:0.20155,(sp1262768:0.06043,sp1262817:0.05893):0.14272):0.0997):0.07064,((sp1262905:0.25793,(sp1262833:0.13628,(sp1262809:0.14826,(sp1262907:0.10691,sp1262804:0.11557):0.04407):0.04654):0.04823):0.06537,((sp1262686:0.14833,sp1262990:0.19303):0.08372,((sp1262837:0.14448,(sp1262846:0.15057,(sp1262793:0.04187,sp1897034:0.04301):0.08724):0.04484):0.10095,(sp1262826:0.17922,sp1262806:0.17096):0.06928):0.02722):0.02193):0.03384):0.18412):0.07398):0.06382,(sp1033810:0.19652,(sp154288:0.02822,sp1712675:0.02142):0.14321):0.03982):0.03853):0.10453):0.01961,(((sp360911:0.00281,sp1397696:0.00375):0.01021,((sp1397694:0.00125,sp506480:0.00331):0.00188,(sp1385984:0.0038,sp33987:0.01638):0.00256):0.00673):0.05636,(sp1224749:0.00734,(sp1397699:0.00584,(sp169177:0.00185,sp262543:0.00234):0.00566):0.02504):0.06185):0.13518):0.03497,((((((sp1314751:0.03667,(sp79882:0.01231,(sp1665556:0.06033,((sp1643452:0.00484,sp406124:0.00172):0.00202,(sp79883:0.00377,sp1076414:0.00541):0.00224):0.00422):0.00938):0.0376):0.03674,((sp930152:0.02419,sp304268:0.01627):0.02982,(sp1926280:0.013,(sp1033734:0.01051,sp263474:0.04293):0.00573):0.03304):0.03012):0.01306,((((sp1441095:0.04986,(((sp1925020:0.01274,sp119858:0.00714):0.00277,((sp1274524:0.00359,sp1664069:0.01243):0.00298,sp1402:0.00647):0.00183):0.02135,((sp720555:0.01255,((sp279143:0.00304,(sp224308:0.00301,sp1071061:0.00644):0.00311):0.00471,(sp1423:0.00822,sp1793963:0.00519):0.00499):0.00796):0.0128,sp1408:0.0469):0.00843):0.01244):0.05162,((sp1348628:0.047,(sp1547283:0.02188,(sp152268:0.02008,sp930124:0.01985):0.01079):0.02407):0.01698,((sp246786:0.01097,sp1608910:0.00821):0.03887,sp1423321:0.06711):0.0134):0.01273):0.02979,(((sp1404:0.02077,sp86664:0.0209):0.03965,(sp284581:0.04803,sp135735:0.08282):0.01051):0.01024,(sp1208600:0.00923,sp1221450:0.00482):0.04619):0.01882):0.00731,((sp178774:0.0086,sp1516104:0.00784):0.07996,(sp1121093:0.04619,(sp1761751:0.01428,((sp315749:0.01404,((sp1150157:0.002,(sp574375:0.00652,(sp1405:0.00664,(sp526986:0.00347,sp1396:0.00714):0.00269):0.00463):0.00764):0.00243,sp1761753:0.00496):0.00464):0.00962,sp574376:0.01991):0.00553):0.0289):0.02692):0.0403):0.00708):0.01874,((sp33936:0.08459,(sp279215:0.03021,((sp150248:0.00275,(sp198467:0.00339,(sp33934:0.00253,(sp1325335:0.00379,sp491915:0.00212):7.1E-4):0.00103):0.00121):0.03324,(((sp471223:0.00587,(sp1426:0.00437,sp186116:0.00375):0.0098):0.00506,((sp81408:0.00411,sp1295642:0.00591):0.00176,((sp129338:0.00247,sp1921421:0.0122):0.00953,(sp1382357:0.01092,(sp1223502:0.0035,(sp1382315:0.0032,(sp33941:0.00109,sp1954237:0.00134):5.8E-4):0.00107):0.00401):0.0029):0.03023):0.00594):0.03422,(sp1490052:0.02071,sp1382358:0.00962):0.01289):0.00967):0.01657):0.03431):0.02191,((sp1479:0.06432,((sp35841:0.02913,sp1499685:0.0381):0.05268,sp301148:0.10757):0.02702):0.01887,((((sp796606:0.0122,sp997296:0.01459):0.03506,(((((sp1348629:0.04522,(sp1637975:0.00272,sp1742358:0.00425):0.03886):0.0129,(sp1729688:0.05359,(sp285983:0.01789,(sp129985:0.03748,(sp977905:0.0052,sp1321606:0.00438):0.00405):0.00457):0.03968):0.00596):0.02464,(((sp1476857:0.01436,(sp1684144:0.01384,sp1679166:0.01564):0.00735):0.01205,(sp1743144:0.01563,sp1705566:0.02087):0.01765):0.03091,((sp1761761:0.04096,sp1298866:0.04208):0.00927,(((((((sp1117379:0.01684,(sp220687:0.00869,sp220686:0.01004):0.0109):0.00865,sp1348630:0.02741):0.00551,(sp1449046:0.01525,sp220684:0.01615):0.00826):0.00536,sp1414718:0.01904):0.00884,(sp1928617:0.02343,(sp86668:0.00884,sp1882761:0.01921):0.00868):0.01532):0.0058,(sp1340434:0.00993,sp1678002:0.00832):0.01604):0.00532,(sp1499688:0.03551,(sp1347369:0.03136,((sp1193713:0.02043,sp1499680:0.02031):0.01578,(sp1565991:0.02426,sp1314754:0.0282):0.00666):0.011):0.01034):0.00806):0.01294):0.00585):0.013):0.00548,((sp1805474:0.03754,(sp1684142:0.02617,sp930146:0.03413):0.01494):0.01974,sp666686:0.05514):0.01126):0.01122,((((sp549687:0.02473,(sp1742359:0.01765,sp1720553:0.02596):0.00929):0.01335,(sp762947:0.03119,(sp859144:0.02908,(sp935836:0.00783,(sp1459:0.00401,(sp1196031:0.00195,sp1399:0.00994):0.00157):0.00873):0.01079):0.0138):0.00511):0.01609,((sp1034347:0.02786,sp1926278:0.02771):0.01778,sp1816695:0.04506):0.00563):0.00531,(sp1805475:0.05001,(sp1408303:0.00483,sp1397:0.0058):0.05309):0.00937):0.00739):0.00992):0.01681,((sp1121092:0.06047,((sp1243664:0.0509,(sp1622072:0.02662,sp1211814:0.02667):0.01001):0.03999,((sp1882764:0.03697,(sp1816693:0.03329,(sp264697:0.00491,(sp1478:0.00426,sp421767:0.00797):0.00247):0.02852):0.01513):0.01136,(sp1174504:0.05558,(sp1208599:0.00472,(sp1720554:0.00714,sp1679170:0.00438):0.00473):0.05443):0.00688):0.03374):0.01382):0.01744,(sp1679169:0.0184,sp1743146:0.01805):0.06598):0.01588):0.01472,((((sp444461:0.04777,sp363870:0.02174):0.0281,(sp157838:0.03062,(sp209389:0.0493,(sp254757:0.01528,sp46224:0.01732):0.02096):0.00801):0.01209):0.0187,(sp1121090:0.05695,(sp1348624:0.05023,(sp217031:0.04476,sp1522308:0.04632):0.02763):0.01506):0.04682):0.0175,((((sp889306:0.04324,(sp135826:0.00658,sp1508404:0.00464):0.0518):0.0507,(sp1150625:0.06642,(sp189381:0.0209,(sp189382:0.01147,(sp218284:0.0086,sp1073842:0.01804):0.00987):0.01018):0.05658):0.01453):0.01605,(((sp550447:0.01963,(sp394098:0.00805,(sp426756:0.00547,(sp426757:0.01749,sp1235279:0.00276):0.003):0.01919):0.02057):0.06013,(((sp1476:0.06037,(sp759851:0.01199,(sp1930546:0.00825,sp1571:0.01892):0.01214):0.0379):0.03286,(sp1759557:0.03045,sp98228:0.03528):0.01368):0.0135,(sp334735:0.02116,(sp1382305:0.00183,sp1582223:0.00379):0.02315):0.0406):0.03651):0.03028,((((sp244:0.02645,((sp1185653:0.01065,(sp1302659:0.01785,((sp414778:0.00236,sp1215089:0.00479):0.00313,(sp1526927:0.0039,sp1374:0.00827):0.00167):0.0038):0.00416):0.02116,(sp1499687:0.0177,sp459472:0.04133):0.00659):0.0099):0.03291,(sp200991:0.00711,sp1038856:0.00581):0.00668):0.01967,sp192421:0.02761):0.06764,((((((sp1384057:0.02816,(sp1211035:0.01964,sp1160707:0.0871):0.00877):0.01332,(((sp1811976:0.01742,(sp1384049:0.0527,((sp33978:0.01335,sp33977:0.01886):0.03258,(sp76853:0.01756,sp459347:0.02786):0.01948):0.01183):0.00472):0.02204,sp1347368:0.03865):0.00921,sp1220589:0.02281):0.00862):0.0174,(sp1145276:0.00774,((sp33935:0.01285,(sp1500270:0.0045,(sp1421:0.0642,(sp1681184:0.0057,sp1285586:0.01505):0.00267):0.02081):0.00156):0.00369,(sp582475:0.00325,(sp1680467:0.00388,sp1932366:0.00576):0.00187):0.00772):0.00442):0.02197):0.01207,sp1461583:0.05923):0.0189,(sp263475:0.03385,(sp241244:0.05493,(sp1750719:0.03021,(sp1033740:0.02198,(sp1033739:0.01647,sp1334046:0.01377):0.02666):0.0421):0.02221):0.02641):0.02382):0.02206,((((sp650093:0.01966,sp1305836:0.02124):0.02531,sp1231057:0.04186):0.00677,sp1078085:0.00955):0.04567,(sp1884358:0.02602,(sp1581038:0.02862,(sp1884359:0.00853,(sp126157:0.00522,sp126156:0.01403):0.0037):0.02204):0.02358):0.05519):0.01589):0.01855):0.01466):0.05879):0.0182,((sp1123719:0.03665,(sp1679168:0.01168,sp1455:0.01291):0.01795):0.02489,(sp1714264:0.00445,(((sp1714016:0.00322,sp1587527:0.01318):0.00653,((sp1714354:0.00518,sp29332:0.00497):0.0326,(sp1017273:0.01003,(sp1437523:0.01191,sp1071054:0.00722):0.00427):0.00177):0.02166):0.01264,sp1714355:0.01121):0.00447):0.05079):0.03792):0.01393):0.00985):0.01166):0.01605):0.00767):0.0279,((sp1821260:0.09712,(sp1305675:0.08319,(((((sp279813:0.00811,(sp1401258:0.00162,sp571932:0.00318):0.00482):0.06746,((sp86666:0.01267,(sp570947:0.04837,sp1230341:0.0416):0.00836):0.08556,((sp402384:0.01727,(((sp240303:0.00734,sp240302:0.00823):0.00886,(sp192814:0.02897,(sp1926286:0.05682,sp866895:0.03478):0.00777):0.00602):0.02074,(sp1793726:0.019,sp1121938:0.02279):0.00501):0.00503):0.01812,sp578214:0.03997):0.01693):0.02997):0.01581,(sp1385510:0.08214,((sp1385511:0.04564,sp1385513:0.04567):0.0106,(sp1385512:0.06163,sp1385514:0.07462):0.01472):0.02737):0.03153):0.01685,((((((sp1462524:0.02387,sp200904:0.04022):0.02063,(((sp872970:0.03792,sp562743:0.0272):0.00864,(sp1220586:0.03614,(sp442899:0.00842,(sp306540:0.01411,sp306541:0.00433):0.00718):0.05703):0.00487):0.00815,(sp1612202:0.05759,sp698758:0.09793):0.01387):0.04223):0.01811,(sp1308866:0.08807,((sp1306159:0.03247,sp531814:0.02824):0.01423,(sp1816696:0.05631,((sp1121929:0.01269,sp334253:0.035):0.00747,((sp1027249:0.00386,sp1564956:0.00486):0.01362,sp1298598:0.04676):0.01045):0.01029):0.00804):0.01232):0.03095):0.01566,(sp1926277:0.02528,(sp407036:0.01486,(sp1499679:0.00529,(sp1401260:0.00394,sp482461:0.0033):0.00495):0.01095):0.01602):0.02476):0.01368,((sp698769:0.08417,(((sp930131:0.03405,sp930117:0.03666):0.01182,(sp694055:0.03929,(sp981383:0.02609,(sp161536:0.02327,(sp1347087:0.01863,sp1122940:0.01949):0.01341):0.00779):0.01148):0.03569):0.0438,(((sp1936063:0.03744,(sp405946:0.01677,sp1851204:0.0154):0.03702):0.03923,((((sp182710:0.0086,sp221109:0.00645):0.02649,((sp545501:0.01081,(sp1462527:0.01087,sp1926285:0.03133):0.00558):0.00456,(sp582851:5.5E-4,sp1481930:0.03253):0.01433):0.04128):0.04547,sp946235:0.01472):0.03245,sp937928:0.0134):0.04508):0.01089,(((sp1462526:0.0318,sp1348908:0.01735):0.00813,(sp84407:0.03523,(sp302167:0.02076,sp1911587:0.02901):0.01844):0.02001):0.0238,((sp1482:0.00162,sp403957:0.00243):0.04407,(sp171693:0.00846,sp586413:0.00869):0.03175):0.00854):0.00962):0.01141):0.01072):0.00633,((sp237679:0.02478,(sp558169:0.03507,((sp640948:0.01876,sp1472767:0.04509):0.02404,sp1293599:0.06677):0.00914):0.02974):0.04672,(sp480071:0.04981,sp553311:0.05113):0.01345):0.0136):0.0479):0.01029,(sp586416:0.012,sp361279:0.03062):0.09441):0.01652):0.01177,(sp237682:0.09741,(sp1121936:0.10419,(sp237069:0.03885,(sp571933:0.01819,sp1294022:0.07909):0.01714):0.03409):0.06827):0.04048):0.06112):0.0251):0.01765,(sp1131731:0.06624,sp1191699:0.05495):0.06116):0.01471):0.01883,sp1632858:0.13347):0.03495):0.01353):0.07749):0.016,((((sp1118054:0.03278,((sp1042163:0.00609,sp1121121:0.00284):0.0606,(sp1300222:0.02118,(sp1408254:0.01727,((((sp1884381:0.00583,sp54911:0.00819):0.0098,(sp1393:0.00746,sp54915:0.01535):0.00337):0.00694,sp54914:0.00401):0.00368,sp1071072:0.00398):0.01104):0.02298):0.02474):0.01987):0.09149,(sp1450761:0.02395,(sp1121002:0.06594,(sp47500:0.0046,sp649747:0.00392):0.02696):0.01832):0.07539):0.03363,(sp1631346:0.18906,sp1236954:0.12169):0.02473):0.01563,((sp337097:0.05874,sp1413211:0.07782):0.05693,(((((sp1178515:0.09204,(((sp1729690:0.02393,sp1078505:0.02299):0.05677,(sp1882751:0.04642,(sp1761880:0.00573,((sp1736538:0.00163,(sp1736411:0.00161,sp59842:0.00422):0.00169):0.00212,(sp1469647:0.00629,(sp1850517:0.00342,((sp1736398:5.3E-4,(sp512399:0.00295,sp1380372:0.00507):0.00241):0.00164,sp1736404:0.00117):0.00405):0.00987):0.0016):0.00561):0.04034):0.04182):0.02833,(((sp162209:0.02976,sp1122919:0.0661):0.01273,(sp1502764:0.04972,(sp1007103:0.00263,(sp1444314:0.00535,sp624147:0.00628):0.02125):0.02265):0.02191):0.02114,(sp1449063:0.02214,(sp1566278:0.00434,sp1920421:0.00346):0.07717):0.01712):0.02542):0.01727):0.02339,(sp147375:0.0775,(sp1689269:0.05169,sp1280390:0.0531):0.06218):0.01597):0.01895,((((sp1882832:0.04085,sp1122923:0.0119):0.06572,(sp1122924:0.0648,sp717605:0.0859):0.01131):0.00677,((sp1126833:0.05172,((sp1122917:0.0669,(sp1502753:0.02153,(sp1884377:0.02055,(sp1881032:0.00223,sp1884382:0.0056):0.0127):0.00761):0.03715):0.00943,(sp717606:0.05517,((sp1736234:0.04266,(sp1243662:0.02459,(sp324057:0.00998,sp1045775:0.0064):0.01951):0.01139):0.00904,(sp1844972:0.04131,(sp1122920:0.03918,(sp1736388:0.00772,((sp1679165:0.00827,sp1684143:0.00845):0.01446,sp1920422:0.01305):0.01048):0.01736):0.01531):0.00819):0.02441):0.00523):0.0323):0.00618,sp1695218:0.05792):0.02564):0.01863,(sp1121346:0.04643,(sp1855288:0.07484,sp979226:0.06709):0.03857):0.0604):0.02448):0.02959,(((((((sp1566358:0.04419,(sp1236976:0.0404,(sp948756:0.00665,(sp494026:0.00658,sp1763538:0.0354):0.03562):0.04796):0.02339):0.02052,(sp1236974:0.01224,((sp59843:0.00512,(sp1401:0.00197,sp1705110:0.01092):0.00258):0.00505,(sp1527293:0.01595,sp1313296:0.01381):0.01946):0.02308):0.03012):0.00834,(sp297318:0.01314,sp1472719:0.07668):0.01691):0.01077,(((sp1761874:0.00449,sp1921144:0.00364):0.02973,((sp172713:0.00328,(sp1406:0.00136,sp985665:0.00993):0.00212):0.03339,((sp1349782:0.00178,sp1472:0.00189):0.00511,(sp1736552:0.00574,sp582692:0.00741):0.00283):0.02636):0.01038):0.00935,((sp1122921:0.04444,((sp169760:0.01173,(sp1268072:0.0279,(sp1333845:0.00415,(sp1333534:0.00379,sp44251:0.00139):0.00286):0.00619):0.00404):0.017,(((sp268407:0.02319,(sp1536770:0.0021,sp189426:0.0045):0.0093):0.00204,((sp1536774:0.00794,((sp160799:0.00187,sp1926588:0.00816):0.00584,((sp1232431:0.00646,sp1349434:0.00263):0.00119,(sp1034769:0.00704,(sp189425:5.5E-4,sp483937:0.00342):0.0035):0.0025):0.00126):0.00242):0.00281,(sp1566279:0.02574,(sp1174501:0.00414,(sp1536772:0.00141,sp1536773:0.00213):0.00657):0.00613):0.01382):0.00616):0.00906,sp1850362:0.01513):0.01517):0.04074):0.00657,((sp1123226:0.06808,(sp1886670:0.02756,(sp1567107:0.00273,sp1616788:0.00254):0.02935):0.03317):0.01948,sp1462996:0.0472):0.0076):0.02575):0.01532):0.01017,(sp1816681:0.02987,(sp1122918:0.03575,(((sp1122925:0.00379,sp1737426:0.00444):0.01529,(sp1720296:0.02743,sp1235795:0.00893):0.00932):0.00811,(sp670482:0.014,sp1622070:0.02961):0.00546):0.00629):0.01017):0.01529):0.01919,(sp1122927:0.01075,sp1324314:0.0112):0.04884):0.01267,((sp1196323:0.03036,(sp1206781:0.00421,sp1761878:0.00565):0.02085):0.01771,(sp1852522:0.04467,(sp1122926:0.03509,sp1122916:0.03485):0.0255):0.01486):0.04024):0.01868):0.02389,sp1033743:0.09201):0.07774):0.02676):0.01701):0.01671,(sp1089548:0.14491,sp1484:0.24336):0.07485):0.04121):0.02939,(sp1765683:0.25449,((sp1120973:0.08378,sp1157490:0.1375):0.05,(sp562970:0.16215,(((sp1120972:0.0146,(sp1220571:0.00693,sp1220573:0.00604):0.0198):0.10145,((sp1382304:0.00287,sp392015:0.00479):0.07639,(sp471514:0.11185,(sp1120971:0.03409,sp1111479:0.03167):0.04553):0.01494):0.02424):0.02406,(sp1882406:0.12129,((sp1255277:0.05445,(sp368812:0.00107,sp89784:0.00254):0.02785):0.04361,((sp1220572:0.00914,(sp521098:8.8E-4,(sp1048834:0.00462,sp543302:0.00372):7.1E-4):0.00233):0.00425,(sp252246:0.01815,sp1314748:0.01653):0.02104):0.08371):0.07033):0.03754):0.08701):0.01914):0.04357):0.03697):0.09259):0.02628):0.02478,((((sp1605376:0.1516,(sp698762:0.12442,(sp55779:0.04095,sp1525:0.05934):0.06493):0.07688):0.02504,(sp1304884:0.21073,(sp1635275:0.18726,sp1676157:0.1208):0.10801):0.044):0.02812,(((sp1449126:0.15976,(sp1531962:0.12034,sp656914:0.16531):0.09271):0.04402,(sp498761:0.17501,((sp999898:0.10655,(((sp646529:0.01204,sp476652:0.02256):0.03756,((sp1633135:0.03265,sp1888891:0.03455):0.00835,(sp1531958:0.03935,(((sp768710:0.01889,sp768706:0.03956):0.00948,(sp1121419:0.00316,sp768704:0.00301):0.02021):0.00643,sp1121420:0.01461):0.01841):0.0146):0.0223):0.07753,(sp871968:0.06051,(sp871963:0.03224,(sp756499:0.0144,(sp272564:0.0059,sp1121395:0.00345):0.00993):0.02059):0.04053):0.02785):0.02812):0.03448,(sp1035308:0.16138,sp645991:0.10141):0.0727):0.11363):0.03445):0.02758,(((((((sp1121423:0.14581,(sp868595:0.03639,(((sp1121429:0.01213,sp1121428:0.02366):0.01894,(sp349161:0.04966,(sp1833852:0.02046,sp1121421:0.0316):0.02588):0.00767):0.01865,sp696281:0.06102):0.01332):0.09153):0.03108,(sp1285191:0.05815,sp485916:0.10016):0.08999):0.01666,(((sp1121422:0.01606,sp341036:0.02454):0.06155,(sp39060:0.04554,sp767817:0.06595):0.01796):0.08154,((sp1635262:0.2141,((sp1121468:0.14373,(sp1121430:0.02157,(sp1121432:0.00637,sp760568:0.00696):0.015):0.02692):0.0476,sp1838280:0.09908):0.01904):0.01861,(sp1121472:0.11145,sp1531961:0.14337):0.03072):0.02278):0.01587):0.01245,(sp370438:0.07028,sp1671628:0.07446):0.06233):0.02877,((sp1919273:0.06275,sp477974:0.08585):0.14257,sp429009:0.23216):0.05381):0.03403,(sp635013:0.14257,sp246194:0.2375):0.04725):0.01788,sp1926599:0.18188):0.02954):0.01982):0.01795,((sp1671631:0.1775,(sp643648:0.14214,(sp1123382:0.11585,(sp690567:0.15041,(sp1671629:0.10211,(sp1671630:0.13132,(sp1294023:0.1225,(sp378794:0.00736,sp335541:0.00573):0.10194):0.0305):0.02285):0.05188):0.0258):0.06991):0.02184):0.1111,sp1089553:0.22921):0.03678):0.03657):0.02569):0.01873):0.02162,((sp1671642:0.2465,(sp1671636:0.23967,sp1671639:0.31224):0.0513):0.03338,(sp244328:0.22607,(sp1555112:0.30665,sp1676158:0.18682):0.04044):0.0494):0.04862):0.03098,(((sp574087:0.16878,(sp957042:0.07978,sp142842:0.10193):0.04282):0.05617,(sp748449:0.15654,(sp926692:0.09508,(sp926561:0.05723,sp1413210:0.08396):0.03083):0.06481):0.05349):0.09909,((((sp656519:0.0563,(sp29563:0.0521,(sp56779:0.01255,(sp572479:0.03973,(sp54121:0.01987,sp1293054:0.01488):0.02503):0.0058):0.02601):0.0242):0.11648,sp321763:0.30498):0.05343,sp1671624:0.18377):0.02392,sp373903:0.15536):0.10368):0.12009):0.04698,(((sp266117:0.06868,(sp909625:0.18915,sp42256:0.11113):0.04348):0.34602,(sp29539:0.19736,((sp1283299:0.12952,(sp1298857:0.0457,sp1123262:0.04917):0.09578):0.02139,(sp469383:0.12265,(sp1122939:0.0333,sp929712:0.03761):0.22645):0.03144):0.10963):0.17783):0.09272,(((sp1927122:0.09345,sp1635289:0.11293):0.09309,((((sp74426:0.05394,(sp1870987:0.06191,(sp742742:0.04497,((sp1720204:0.0436,sp1499681:0.05844):0.01318,(sp1871016:0.02872,(sp521003:0.01501,sp445975:0.01153):0.05424):0.01515):0.01627):0.02517):0.0207):0.01229,((sp1118060:0.02565,sp1232436:0.05096):0.03818,sp700015:0.09739):0.0152):0.08494,(((((sp1321773:0.00563,sp1776381:0.01176):0.13753,(((sp1871033:0.0531,((sp1739330:0.04852,sp712411:0.06172):0.02186,sp1125712:0.10059):0.01863):0.01454,sp661087:0.05327):0.01238,(sp604330:0.06608,(sp633147:0.04988,(sp866774:0.06591,sp82135:0.0474):0.07815):0.01156):0.00822):0.01678):0.01749,(((sp1190620:0.00481,sp521095:0.00643):0.03772,(sp1203602:0.02427,sp1383:0.02129):0.02973):0.04699,((sp1805478:0.02715,(sp1852386:0.01594,sp1871031:0.03184):0.01141):0.04387,(sp1855394:0.00357,(sp1299998:0.00276,sp1504822:0.00331):0.00312):0.07552):0.01563):0.02609):0.03327,(sp1393034:0.07402,(sp1381:0.01454,sp1121023:0.01064):0.02569):0.07266):0.02181,sp1871022:0.09816):0.0901):0.08678,(sp1944646:0.23632,((sp471855:0.07246,sp649764:0.06821):0.06708,((((sp1034345:0.08985,((sp1262876:0.08847,sp1262868:0.05231):0.05944,(sp1720315:0.0712,(sp79604:0.05356,sp469378:0.07732):0.03316):0.04173):0.02682):0.02964,(sp502558:0.04753,((sp1870985:0.02111,(sp84112:0.02311,sp1841863:0.05128):0.00961):0.02154,sp1780377:0.03552):0.01572):0.02383):0.01707,(sp1384484:0.01342,(sp1121866:0.01456,sp1235794:0.01202):0.00764):0.07914):0.01689,(sp1531429:0.07443,sp1588753:0.09339):0.0701):0.01935):0.03346):0.05178):0.10646):0.14098,(sp1797197:0.428,((((sp1121881:0.18971,(sp525909:0.17324,sp1121877:0.16977):0.12624):0.11023,(sp1650658:0.2435,((sp1313172:0.13075,(sp1661706:0.07311,sp1661702:0.07352):0.06893):0.12123,(sp1641811:0.15272,sp1229780:0.21534):0.07324):0.07547):0.0404):0.08136,(sp1797204:0.34267,sp1069448:0.3468):0.07097):0.03721,((sp1574409:0.48228,sp352211:0.15178):0.11045,((sp1504319:0.21257,sp932044:0.26584):0.05279,(((((sp987045:0.0232,(sp419479:0.01434,(sp561176:0.00636,sp702383:0.00763):0.00782):0.0194):0.10355,((((sp1033730:0.05855,(sp1736691:0.07452,(sp1736540:0.0634,((sp585531:0.03794,sp1229203:0.04001):0.01851,(sp1736550:0.04928,(sp2041:0.01813,sp1736325:0.01747):0.03867):0.01647):0.01393):0.01583):0.01857):0.07977,((sp397278:0.04549,(sp1298863:0.0317,(sp1736379:0.02384,sp642780:0.02445):0.02223):0.01438):0.02913,((((((sp1122609:0.05439,(sp1380388:0.02215,((sp1736439:0.00619,sp1380392:0.01599):0.02443,sp196162:0.02181):0.00613):0.01086):0.0098,(sp1300347:0.04848,(sp1045774:0.02969,sp1736331:0.03287):0.01794):0.00834):0.00732,((((sp1844:0.00682,sp1881028:0.00818):0.06325,(sp574651:0.04006,sp1283287:0.05032):0.01209):0.0096,sp1122610:0.05411):0.01732,((sp1736488:0.01844,sp1736586:0.03321):0.01088,(((sp1449070:0.01232,sp2045:0.02952):0.01028,sp935866:0.01285):0.00689,sp1736500:0.01143):0.00773):0.04857):0.014):0.00784,(sp1005945:0.02403,sp1005944:0.02113):0.02748):0.0132,(sp110319:0.03767,(sp402596:0.01327,(sp1736431:0.01036,(sp1736408:0.01199,sp748909:0.01822):0.00556):0.00958):0.02385):0.02743):0.01079,sp1122608:0.07155):0.01785):0.05509):0.03843,((sp1122138:0.02198,(sp1933817:0.00877,sp479435:0.011):0.00866):0.09413,((sp675864:0.09992,(((sp1522317:0.10084,(sp1122999:0.08964,sp1674809:0.07931):0.0253):0.02479,((((sp1122997:0.02149,sp1122998:0.0273):0.04577,(sp1160719:0.07108,(sp33010:0.01065,(sp1574624:0.0089,(sp1747:0.0079,sp671223:0.01687):0.0028):0.00817):0.03119):0.01524):0.07148,((sp1122994:0.07356,(sp64702:0.08147,sp1744:0.08737):0.01984):0.0497,(sp1203605:0.09906,(sp883161:0.12058,sp1871034:0.07217):0.05564):0.03007):0.03854):0.02169,(((sp1410634:0.06155,sp686624:0.03871):0.03189,(((sp1909732:0.03305,(sp1610493:0.05133,(sp1906324:0.0281,sp1522311:0.02707):0.04096):0.00987):0.00886,(sp399497:0.01842,(sp1332264:0.01851,sp1123357:0.03594):0.00709):0.0265):0.02254,sp767029:0.08122):0.01245):0.05702,(sp1255658:0.06694,sp1120954:0.08725):0.02261):0.0127):0.01528):0.01379,(sp1220580:0.10526,sp1577474:0.12998):0.0149):0.02481):0.02136,(sp630515:0.09982,(sp1032480:0.05857,(sp546871:0.05697,(sp1036181:0.00725,sp546874:0.01608):0.05573):0.03174):0.0198):0.01769):0.07261):0.0191):0.03065,(sp1120950:0.03699,(sp117157:0.00968,sp504797:0.01144):0.0398):0.09313):0.03454):0.02346,((((sp1121017:0.02775,sp1658671:0.02207):0.06149,(((((sp1641401:0.02299,sp1274:0.02188):0.05108,(sp1807500:0.06588,(sp1121385:0.06974,(sp571913:0.03769,sp1631356:0.0197):0.01999):0.01143):0.01564):0.01554,(sp478801:0.12719,(sp1122622:0.02843,(sp1043205:0.01616,(sp767452:0.02095,(sp1758689:0.00951,sp1123251:0.01084):0.00785):0.00667):0.03135):0.05402):0.02997):0.01614,((sp710696:0.03151,(sp1869167:0.04843,(sp1386089:0.01759,(sp1619947:0.0103,(sp1727:0.00638,(sp1380370:0.00615,(sp1736418:0.00293,sp1736603:0.00186):0.0015):0.00342):0.00337):0.01113):0.00527):0.0079):0.048,(((sp1193518:0.06678,(sp262209:0.03539,(sp1216969:0.06941,(((sp1216972:0.01419,(sp1216970:0.00845,sp1736393:0.00811):0.02415):0.0082,sp1210046:0.01419):0.00763,sp103817:0.01032):0.0144):0.02529):0.04498):0.01635,(((sp1385521:0.01482,(sp1385520:0.00996,sp1385518:0.01044):0.00493):0.00596,(sp1385519:0.02214,(sp313589:0.01322,sp1736394:0.01216):0.01082):0.00849):0.03456,(sp1193181:0.04132,(sp367299:0.02306,sp1736399:0.03112):0.02494):0.01148):0.01958):0.00969,(sp443156:0.03994,sp587636:0.03009):0.01219):0.01667):0.0197):0.01184,(sp1184609:0.05687,(sp100225:0.061,((sp1522310:0.01895,sp1089455:0.0265):0.03915,sp1121387:0.10048):0.01278):0.01146):0.02511):0.01058):0.05155,((sp1881057:0.10977,(sp266940:0.10924,sp1306174:0.09903):0.02913):0.0246,(((((sp1304865:0.06479,(sp1689271:0.04496,((((sp1736546:0.00156,(sp1736362:0.00283,(sp1736339:0.00295,sp1736609:0.03485):0.00176):0.00282):0.00592,(sp1302620:0.00512,sp1380354:0.00778):0.00718):0.02299,(sp590998:0.02043,(sp1454010:0.01516,((sp593907:0.0134,(sp1672219:0.00981,sp1674805:0.0105):0.00725):0.01372,sp1095767:0.02484):0.00599):0.00626):0.00414):0.00781,(sp988821:0.04809,(((sp1295626:0.00779,sp1346710:0.00357):0.01432,(sp1855324:0.01057,sp446466:0.01122):0.00719):0.01361,sp1895740:0.06824):0.00873):0.00806):0.01577):0.01871):0.01162,((((sp1713:0.00371,sp43678:0.00441):0.03508,(sp903523:0.00429,(sp1980001:0.00576,sp264251:0.00286):0.00373):0.02406):0.0177,((sp1305855:0.01629,sp446471:0.01726):0.03271,(sp743718:0.02774,(sp1300344:0.03992,sp526729:0.03333):0.00916):0.00959):0.02263):0.01466,((sp285351:0.05764,((sp1736209:0.00564,sp446469:0.0039):0.02175,(sp1223525:0.0126,sp1814289:0.02198):0.01753):0.02849):0.01301,(sp1095772:0.08746,(sp471856:0.02466,sp1122130:0.03176):0.03656):0.05016):0.01137):0.01278):0.02794,(sp431489:0.15109,((sp676199:0.00278,sp676200:0.00196):0.06544,(((sp327095:0.0433,(sp1570345:0.01087,sp1570342:0.01636):0.01232):0.0115,((sp1570346:0.01964,(sp1570340:0.00359,sp1570344:0.00477):0.01062):0.01983,(sp1095026:0.03192,(sp676202:0.01228,sp1095025:0.04657):0.00943):0.01959):0.01257):0.01497,((sp1570341:0.02472,(sp1570343:0.01143,sp577470:0.00905):0.01887):0.02515,(sp1638984:0.03112,((sp1638985:0.0063,sp1638982:0.00478):0.0067,((sp1043493:0.01076,(sp1536641:0.00389,sp1638989:0.00562):0.00481):0.00396,(sp1638987:0.01228,(sp1638981:0.00206,sp1638988:0.00246):0.01229):0.00299):0.00375):0.01869):0.01769):0.00933):0.01081):0.02142):0.09723):0.01549,(((sp1123065:0.05907,sp648782:0.04297):0.04881,(sp208480:0.11088,(((sp871571:0.0534,sp548479:0.0501):0.1688,((((((sp525245:0.10706,(sp883069:0.00501,sp1689268:0.00624):0.08719):0.04653,((((((sp883077:0.02266,sp888050:0.02752):0.00685,(sp1871028:0.02879,sp1120947:0.039):0.01351):0.00972,(sp52773:0.0108,(sp1711:0.00605,((sp139208:0.00354,(sp1105029:0.00186,sp1660:0.0032):0.00166):0.00307,(sp1321775:0.00446,sp936548:0.00751):0.00326):0.00295):0.02432):0.04213):0.01893,sp1720198:0.08053):0.02592,(sp1852376:0.02639,sp1661:0.11787):0.02179):0.023,sp131110:0.08809):0.04812):0.02152,((sp1870994:0.01551,(sp1852372:0.00823,(sp1403948:0.00758,sp184870:0.00583):0.00436):0.01198):0.15788,(sp28264:0.01023,sp33007:0.01153):0.1158):0.04161):0.01589,(sp156892:0.06373,(sp1921764:0.04487,sp1912795:0.03281):0.02034):0.07785):0.02398,(((sp1871014:0.11213,(sp59561:0.11551,(sp131112:0.0163,sp644284:0.01719):0.0646):0.01812):0.04157,((sp1227261:0.04542,sp1823756:0.0448):0.04989,((sp1657:0.06987,sp202789:0.04699):0.05859,(sp1120933:0.07928,(sp59505:0.00457,sp883067:0.00128):0.05079):0.02844):0.05453):0.02316):0.03918,sp1522309:0.11918):0.05482):0.00763,(((sp1160091:0.01503,(sp419015:0.01154,sp1122228:0.01479):0.00779):0.05228,(sp1193128:0.03832,(sp1150468:0.04041,sp857290:0.03849):0.01156):0.04196):0.02576,(((sp1341695:0.05936,(sp1437606:0.04818,sp1505727:0.04196):0.01591):0.03107,((sp1693:0.06203,(sp1437603:0.05296,sp77635:0.03284):0.02927):0.01026,(((sp356829:0.03341,(sp1009464:0.00949,(sp2702:0.0077,sp904144:0.00954):0.00551):0.03577):0.00859,((sp1437600:0.00519,sp78344:0.0038):0.0311,((((sp401473:0.00481,sp1435051:0.00431):0.00573,((sp1447716:0.00138,sp28026:0.00317):0.00888,(sp78346:0.00553,sp1680:0.00362):0.00591):0.00894):0.01569,((sp302911:0.02426,(sp1688:0.02923,(sp1447715:0.01975,(sp1280675:0.00231,sp35760:0.00223):0.01778):0.00701):0.00689):0.02763,(sp561180:0.03397,sp1692:0.04631):0.01541):0.02125):0.01214,((sp1437608:0.02385,(sp1681:0.03783,sp158787:0.02175):0.01081):0.01998,((sp1603886:0.03152,((sp1685:0.011,sp216816:0.0098):0.00682,(sp1437607:0.01106,sp1437610:0.01719):0.01653):0.01919):0.00709,((sp1683:0.00549,sp78345:0.00394):0.02552,(sp1437609:0.02174,(sp1329411:0.02293,sp762211:0.01228):0.01841):0.01533):0.01306):0.01278):0.0089):0.00694):0.00983):0.01223,(sp1254439:0.011,sp33905:0.00956):0.04046):0.0103):0.00853):0.02367,((sp218140:0.01445,sp327277:0.01455):0.06086,(sp1437605:0.06284,(sp1687:0.02017,(sp1684:0.00177,(sp1394176:9.9E-4,(sp1394175:0.00155,sp1147128:0.00308):0.00139):0.00136):0.03101):0.03038):0.02936):0.01409):0.02312):0.29662):0.03007):0.01806,(sp52770:0.10288,((((sp103621:0.02633,sp111015:0.02701):0.01125,(((sp1167628:0.01542,(sp1120944:0.0213,sp1120943:0.02121):0.00647):0.01448,(sp888056:0.03526,(sp1120941:0.00718,sp712122:0.00956):0.04049):0.01354):0.0104,(sp1892869:0.01289,sp332524:0.01405):0.04388):0.00785):0.00425,((sp521393:0.00333,(sp52767:0.00593,sp1972192:0.00536):8.4E-4):0.03438,(sp1278298:0.03227,(sp653386:0.00586,(sp544580:0.00374,(sp762963:0.00367,sp1655:0.00141):0.00148):0.00149):0.01903):0.01714):0.00727):0.02771,(sp1857645:0.0353,sp435830:0.08708):0.01363):0.06819):0.01861):0.0189):0.03045):0.01436,(sp1895792:0.08978,sp471853:0.05094):0.03695):0.02064):0.02402,((((sp33889:0.01438,(sp629680:0.02663,(sp1703:0.00492,(sp1136497:0.00268,sp1381751:0.0044):0.01901):0.01002):0.01749):0.05111,((sp1033736:0.04177,sp1121122:0.03578):0.03033,(sp585530:0.05982,(sp1176165:0.00481,sp1739261:0.00382):0.06871):0.02405):0.00953):0.08477,(((((sp1855377:0.06616,sp1081644:0.07064):0.07552,(sp529884:0.05544,sp535712:0.04719):0.04453):0.05955,sp1123013:0.1514):0.01511,(((((sp399736:0.05926,(sp1120958:0.01916,(sp684552:0.01398,(sp1841862:0.02565,sp153730:0.01791):0.01234):0.01042):0.04315):0.0696,((((sp1895789:0.02589,(sp1348338:0.00847,(sp312284:0.00932,sp1112215:0.00926):0.00497):0.05862):0.03214,sp1895791:0.09505):0.01776,sp1736516:0.05806):0.01286,((sp145458:0.02543,(sp33888:0.00794,(sp1736327:0.01122,(sp1736292:0.00893,sp1891671:0.00471):0.00729):0.00375):0.00718):0.0504,(((((((sp1736333:0.00274,sp150123:0.00351):0.04607,((sp123320:0.03188,sp76636:0.06513):0.01155,(sp995034:0.04425,sp640635:0.05639):0.0071):0.00794):0.01269,((((sp1736496:0.00311,sp1978342:0.00223):0.0185,((sp1798222:0.00212,(sp1798223:0.00219,sp1798214:0.0138):0.00241):0.00984,(sp1736341:0.01229,(sp1389489:0.01947,(sp1416759:0.0066,sp1895934:0.00639):0.00988):0.00537):0.00593):0.01131):0.01316,(sp1121952:0.0368,sp1121372:0.05458):0.01586):0.008,(((sp1120960:0.0164,(sp1736601:0.00463,sp232089:0.00605):0.00673):0.02111,(sp1120959:0.0128,(sp1881031:0.00635,(sp1735688:0.00594,sp453304:0.00486):0.00518):0.01306):0.01022):0.01101,(sp1736390:0.01863,(sp1775951:0.0139,sp589382:0.01652):0.01602):0.00644):0.03551):0.01253):0.00468,((sp1736426:0.04156,((sp1736305:0.00189,(sp150121:0.00128,(sp110935:0.00222,sp1735682:0.00104):5.4E-4):0.00358):0.04655,(sp1121924:0.02668,((sp995038:0.00347,(sp1424659:0.00148,sp1424661:0.00278):0.0019):0.03289,(sp386301:0.01589,sp670052:0.01957):0.00854):0.01638):0.01848):0.0085):0.00842,((sp1736567:0.00368,(sp1736314:0.00369,sp1736337:0.00206):0.00446):0.03331,(sp412690:0.0052,(sp1736525:0.00487,sp1500280:0.01073):0.00283):0.03918):0.01633):0.00529):0.0086,(sp1619308:0.0368,(sp381665:0.01048,sp1220584:0.01662):0.01829):0.01915):0.007,(sp1874630:0.00173,(sp31965:0.00575,sp33014:0.00299):0.00285):0.06828):0.00972,((sp1795630:0.03822,(sp1736282:0.01406,(sp1736285:0.00872,(sp1736293:0.00192,sp1736372:0.0021):0.00836):0.00791):0.02416):0.02974,(sp1736311:0.02684,(sp1223517:0.03237,((sp1898731:0.00584,(sp1898743:0.01558,sp1736291:0.00273):0.00385):0.01102,(sp1898742:0.00646,((sp33881:0.0301,(sp2036:0.00316,(sp1561023:0.00419,sp1898738:0.00788):0.00155):0.0034):0.00385,((sp69373:0.00273,sp1905847:0.00204):0.00194,(sp1502773:0.00301,sp1898736:0.00768):0.00315):0.00362):0.00515):0.00685):0.01925):0.01281):0.03212):0.02654):0.00935):0.00988):0.00857):0.01493,(((((((((sp1736478:0.02116,sp1736483:0.01502):0.01013,(sp92835:0.01563,(sp1151122:0.006,(sp69370:0.00275,sp1736323:0.00406):0.01266):0.01354):0.00465):0.00464,(((sp1793723:0.02095,(sp36805:0.01796,(sp162426:0.00331,sp36807:0.00476):0.00969):0.00944):0.00409,((sp273677:0.00199,(sp1169146:0.00217,sp912630:0.00384):0.00571):0.0219,(sp300019:0.00386,sp1761804:0.00602):0.01815):0.00823):0.01009,sp1348253:0.03764):0.00453):0.00647,(sp84292:0.02573,((sp1776083:0.00484,(sp1895788:0.00169,sp1933777:0.00295):0.00118):0.00527,((sp1761809:0.003,((sp1736276:0.00544,sp1906742:0.01):0.00583,(sp979556:0.00342,sp2033:0.00648):0.00207):0.00215):0.00256,sp993073:0.00381):0.00952):0.02765):0.0101):0.00419,(sp1907390:0.02991,(sp1736570:0.03021,(sp1761803:0.01799,sp370764:0.01461):0.01182):0.00876):0.01125):0.00529,((sp1895782:0.03202,sp1873462:0.03561):0.01128,(sp1714373:0.03332,sp1122239:0.03901):0.01073):0.00384):0.0046,(sp400772:0.03086,sp1500279:0.03383):0.00745):0.01096,(sp1231063:0.05605,((sp450380:0.034,((sp1778770:0.01357,(sp1692239:0.0086,(sp1827324:0.0035,(sp861269:0.00579,((sp104336:0.007,sp1696072:0.00631):0.0053,sp273678:0.00849):0.00326):0.00589):0.00539):0.00306):0.00543,(sp1795053:0.01291,(sp1197720:0.02659,(sp1263625:0.01526,(sp1298860:0.00616,((sp82380:0.00494,((sp1452535:0.00201,sp1736463:0.00126):0.00108,sp1339233:0.00812):5.2E-4):5.5E-4,sp1452537:0.0034):0.00149):0.00361):0.0084):0.00631):0.00345):0.01):0.00897,(sp1891970:0.03737,(sp582680:0.02012,sp1223505:0.02164):0.01271):0.00708):0.00958):0.01147):0.01275,(((sp1122238:0.03182,sp1122237:0.06789):0.05135,sp904291:0.02458):0.01436,sp1736553:0.01988):0.02299):0.04495):0.01339,(((sp663704:0.01432,sp55969:0.00815):0.026,(sp1238186:0.03438,(sp1397278:0.01109,(sp1642040:0.02965,((sp1079994:0.01662,sp1461259:0.01251):0.01049,(sp1461260:0.01414,(sp1122175:0.00742,sp1292023:0.00568):0.0091):0.00562):0.00546):0.00697):0.01078):0.0083):0.07861,((sp1121934:0.05006,(sp1278308:0.03802,sp1349787:0.03896):0.04548):0.06288,(sp1349786:0.04992,sp255205:0.05795):0.0168):0.03256):0.01343):0.01488,sp203267:0.44352):0.01676):0.06759,((((sp446860:0.01833,(sp388357:0.00567,sp136273:0.00995):0.01604):0.02024,(sp71999:0.09373,(sp1179225:0.05177,(sp223184:0.01004,((sp378753:0.00416,sp72000:0.00346):0.00423,(sp1272:0.00552,sp282669:0.00424):0.00852):0.00699):0.0218):0.02961):0.01669):0.02999,(((sp43675:0.01842,sp762948:0.02474):0.03696,(sp85336:0.04033,sp1848190:0.03886):0.01019):0.03436,((sp1479623:0.04259,sp1575:0.09838):0.02194,sp37923:0.0394):0.03438):0.02995):0.03254,((sp1121020:0.07393,((sp1897634:0.01473,sp554083:0.02049):0.06473,(((sp37928:0.03754,((sp1216973:0.00585,(sp1732020:0.00229,sp199136:0.00148):0.00528):0.0306,((sp1312954:0.0212,(sp1496689:0.00734,sp1736303:0.00722):0.01148):0.01554,((sp494419:0.00165,sp1267981:0.02542):0.02689,(sp1267973:0.01839,(sp335973:0.00871,sp1736410:0.00822):0.01678):0.00772):0.00669):0.01835):0.00871):0.01068,(((sp1132441:0.01584,(sp1704044:0.00872,(sp656366:0.01381,sp595593:0.02208):0.01001):0.03334):0.0234,((sp1618207:0.01651,sp288705:0.02763):0.01304,sp1120917:0.05971):0.01603):0.01004,(((sp1338436:0.02821,(sp37927:0.01989,sp1531955:0.02032):0.00719):0.04406,sp156980:0.03934):0.01338,(((sp1077972:0.0036,sp1357915:0.00629):0.00449,(((sp361575:0.00249,(sp1736403:0.001,(sp1736400:8.2E-4,sp1158050:0.00847):7.8E-4):0.00254):0.00353,(sp452863:0.00475,sp993070:0.00783):0.00442):0.00272,(((sp121292:0.01201,sp1570137:0.0028):0.00233,(sp1736273:0.00951,(sp1835723:0.00347,(sp930171:0.00374,(sp1938741:0.0026,(sp1882768:0.00208,sp861266:0.00195):0.00193):0.0027):0.00289):0.00324):0.0026):0.00382,(((sp1736342:0.00233,(sp290399:0.00197,sp1610703:0.00154):0.00153):0.0021,(sp1736395:0.00347,sp1955698:0.00379):0.00552):0.00207,(sp1736402:0.00784,((sp1150398:0.0013,(sp1761747:0.00449,sp1761746:0.0015):0.00122):0.00205,(sp1849032:0.00929,(sp1745378:0.00649,sp1736232:0.00252):0.00211):0.00243):0.00316):0.00198):0.0037):0.00742):0.00363):0.01398,((sp1806905:0.00682,(sp29320:0.00122,(sp1761750:0.00163,(sp1502752:0.00181,(sp1115632:9.9E-4,sp1638643:0.00211):0.00236):0.00201):9.1E-4):0.00889):0.0102,(sp1101188:0.01605,(sp1045773:0.00246,sp1920889:0.00784):0.01139):0.00452):0.00654):0.0101):0.00937):0.01152):0.01339,(sp1312959:0.05911,sp1121019:0.04973):0.03911):0.02198):0.01367):0.01183,((sp1581143:0.12602,(sp556325:0.0471,((sp1690248:0.0149,((sp1913445:0.00272,sp861360:0.01125):0.0048,(sp993071:0.0046,(sp1743140:0.00178,sp1933880:0.00544):0.004):0.00614):0.00933):0.05223,(sp494023:0.02295,(sp1276920:0.02063,sp1913576:0.006):0.00949):0.03179):0.02498):0.02255):0.02097,(((sp1122602:0.04841,sp1232429:0.02959):0.01143,(sp795955:0.07222,(sp652017:0.02207,sp317018:0.00618):0.04614):0.00966):0.07774,(((sp1739367:0.03312,sp1270:0.03394):0.0331,(sp574650:0.0309,sp1045009:0.03952):0.02015):0.014,(sp1837282:0.05282,sp1123507:0.03222):0.13459):0.01477):0.02969):0.01753):0.01527):0.04278):0.02384):0.0315,((sp1203568:0.00616,(sp1630135:0.00305,sp521392:0.00528):0.00397):0.12046,(sp472569:0.06436,(sp396014:0.03001,(sp1249481:0.03354,(sp1074488:0.03924,(sp1903186:0.03231,(sp1775432:0.02031,sp446465:0.02243):0.01121):0.02492):0.01163):0.01414):0.02918):0.01654):0.0899):0.02019):0.02148):0.02685):0.0397,sp1048339:0.13487):0.01906):0.01907,((((sp1428644:0.08109,((((sp1888:0.03281,sp1957:0.0247):0.01327,(((sp749414:0.01125,(sp1912:0.0088,((sp67365:0.01626,sp1343740:0.00474):0.00911,(sp75293:0.00435,sp68042:0.00603):0.00228):5.5E-4):0.00614):0.01312,(((((sp66373:0.00621,sp66377:0.0055):0.0147,((sp66875:0.01361,(((sp68570:0.00723,(sp1155718:0.00762,(sp1609095:0.0105,sp316284:0.00919):0.00306):0.00411):0.0076,sp1553907:0.00806):0.00677,(sp1621259:0.01143,((sp1463900:0.0092,sp553510:0.0147):0.00303,sp47763:0.00909):0.00243):0.00199):0.00458):0.00401,(sp58344:0.01651,(sp58346:0.0056,(sp1881021:0.0069,sp1160718:0.0066):0.00165):0.00561):0.00373):0.00538):0.01075,((((sp66429:0.02097,(sp1223523:0.01309,sp1678637:0.01291):0.00873):0.01627,((((((sp1206101:0.00393,sp1196353:0.00674):0.00819,((sp1906740:0.01905,(sp936756:0.00815,(sp1134445:0.00421,(sp1306406:0.00314,sp285473:0.0029):8.9E-4):0.00265):0.0026):0.00605,(((sp1054860:0.00679,(sp1896:0.00424,(sp362257:0.00963,(sp43759:0.0077,(sp1905:0.00697,(sp1736450:0.00537,sp54571:0.00369):0.0034):0.0019):0.00289):0.00256):0.01308):0.00911,sp1703937:0.00408):0.00538,sp1463881:0.00985):0.0031):0.00353):0.00312,(sp1901:0.01749,(sp1463920:0.01784,((sp1703927:0.00502,(sp1463841:0.00416,sp1964449:0.00468):0.00261):0.00109,(sp36818:0.00329,(sp67385:0.00323,(sp465541:0.00411,(sp66430:0.00722,(sp1812480:0.00652,(sp253839:0.00685,sp68223:0.00719):0.00451):0.00698):0.00501):0.00386):0.00341):0.00793):0.0269):0.0161):0.00999):0.0023,(sp1169154:0.01433,sp38300:0.01109):0.006):0.00647,(((sp285458:0.00333,sp1030533:0.00328):0.01851,(sp1703933:0.01414,((sp1172567:0.00438,sp1935:0.00502):0.00475,(sp1718998:0.01287,((sp862751:0.00667,(sp1911:0.00351,((sp1519471:0.00792,sp1736554:0.00479):0.00399,sp591167:0.00197):0.00237):0.00178):0.0044,(sp1703920:0.01389,(sp1157635:0.00406,sp1855346:0.00863):0.00515):0.00369):0.00205):0.00363):0.00413):0.00525):0.00643,((sp1463858:0.01652,sp1440053:0.01079):0.00312,((sp1352941:0.00316,sp193462:0.00474):0.02002,sp1463857:0.02931):0.00592):0.00699):0.00367):0.00473,((((sp285500:0.00455,(sp1463921:0.00436,sp545123:0.00575):0.00241):0.01112,((sp417292:0.00877,sp1463820:0.02055):0.02128,(sp1765722:0.0069,sp67267:0.00787):0.00444):0.00748):0.00756,((((sp67263:0.02425,sp1716141:0.01396):0.00305,(((sp1968:0.01194,((((sp1463917:0.0053,(sp1725411:0.00836,sp1078086:0.00958):0.00531):0.00285,(sp1428628:0.01463,(sp1855349:0.00401,sp1428620:0.00449):0.00399):0.00667):5.5E-4,(sp1890:0.00696,(((sp42234:0.01812,((sp1882757:0.00356,(sp1736503:0.0043,sp1890285:0.0055):0.00139):0.00296,(sp1736452:0.00467,sp1761906:0.00951):0.00709):0.00462):0.00409,sp1943:0.00648):0.0034,sp68231:0.01099):0.00278):0.00295):0.00187,sp67356:0.00889):0.00386):0.00251,(sp909626:0.01054,((sp58343:0.00524,(sp1915:0.00805,sp285535:0.00914):0.00309):0.00446,((sp33898:0.00309,sp1930:0.00706):0.01174,(sp67304:0.00547,sp68239:0.00557):0.00216):0.00164):0.00406):0.00286):0.00168,((((sp1839783:0.00697,sp1214101:0.00862):0.00336,((sp66874:0.00418,(sp1761904:0.00598,sp1855351:0.00548):0.00395):0.00126,(sp146536:0.00858,(sp1938:0.00269,sp661399:0.00512):0.00275):0.00405):0.00227):0.00227,sp1577588:0.00857):0.00191,((sp645465:0.01012,(sp1463901:0.00655,sp1849967:0.00384):0.00568):0.00473,((((sp1428652:0.01074,(sp1359208:0.0064,sp40318:0.01172):0.00514):0.00759,(((sp477245:0.01066,(sp358823:0.00272,(sp1463909:0.00364,(sp1079986:0.00413,((sp1783515:0.00224,sp284040:0.00687):0.00523,sp591159:0.01043):0.00203):0.00221):0.00226):0.01126):0.00292,(sp1703942:0.004,sp1907:0.00587):0.00513):0.00315,(sp1840095:0.03307,sp711393:0.00746):0.00386):0.00456):0.00101,(((((sp1577075:0.00282,(sp710705:0.00733,sp1463880:0.00483):0.00104):0.0016,(sp1355015:0.00806,sp67331:0.00634):0.00231):0.00358,(sp1133850:0.0047,(sp665007:0.00933,(sp1352936:0.00867,sp67315:0.00463):0.00196):9.3E-4):6.0E-4):0.00353,sp146922:0.01362):0.00161,(sp68194:0.0057,((sp67285:0.00957,(sp67386:0.01052,((sp285568:0.00938,sp68214:0.00729):0.00224,((sp1354889:0.00697,sp1855347:0.00617):0.00215,(sp1155714:0.01012,sp73044:0.0133):0.00933):0.00136):9.5E-4):0.00259):0.00249,sp1214242:0.00913):0.0027):0.00409):0.00318):0.00404,((sp1463878:0.00747,sp996637:0.00629):0.01076,((sp55952:0.00543,(sp1570823:0.00494,sp1463926:0.01349):0.00389):0.0059,(sp552354:0.01699,((sp1917143:0.00373,(sp1751294:0.00582,(sp382503:0.01572,sp665577:0.00594):0.00264):0.00629):0.00517,(sp1915400:0.00624,((sp68249:0.0075,(sp100226:0.00456,sp1561022:0.00482):0.00154):0.00246,(sp146923:0.00449,sp1889:0.00903):0.00277):0.00364):0.00216):0.00334):0.00278):0.00317):0.00412):0.00107):0.00359):0.00164):0.00511):0.00411,(sp1172179:0.00918,((sp33903:0.00784,(sp85558:0.01579,(sp1855348:0.00445,(sp1463861:0.00305,sp285514:0.00298):0.00298):0.00863):0.00367):0.00327,(sp193461:0.01288,(sp1963:0.0064,sp1955065:0.01147):0.00464):0.00408):0.00842):0.00342):0.00586,(sp1048205:0.02155,sp1156844:0.02543):0.00396):0.0049):0.00754,(sp591157:0.02719,sp83656:0.01955):0.01788):0.01369):0.01001):0.00777,(sp76728:0.0474,(sp1449353:0.05163,((sp1449347:0.02635,(sp1449346:0.01234,((sp1736486:0.02157,((sp1463934:0.00912,((((sp1463874:0.0112,sp67352:0.00715):0.00638,sp1120523:0.00858):0.00242,sp1463902:0.0077):0.00795,sp68260:0.00526):0.00422):0.00897,(sp1463833:0.01327,(sp2064:0.00822,sp2066:0.01174):0.01206):0.01741):0.01048):0.00757,sp1804758:0.01527):0.00644):0.00681):0.03722,((sp105422:0.01382,sp105425:0.01446):0.02019,(sp981369:0.01084,(sp105420:0.00803,sp235985:0.00917):0.00994):0.02278):0.01549):0.01687):0.03201):0.02469):0.00861,((sp1288083:0.04108,sp1288082:0.04175):0.02045,(sp371720:0.01277,sp1894:0.05031):0.01149):0.00371):0.02725):0.00472,(sp1893:0.03715,sp67373:0.01993):0.01246):0.00653,(sp1906:0.01707,sp549819:0.03786):0.01134):0.00339):0.00498,(((sp44060:0.02388,sp403935:0.01348):0.01471,((((sp1176198:0.00482,sp408015:0.00942):0.02842,(sp1550035:0.03032,(sp500153:0.03491,(sp1857892:0.02111,sp498367:0.01807):0.00559):0.00419):0.01508):0.0091,sp910347:0.0584):0.01632,(((sp1286822:0.00963,(sp1289387:0.01442,(sp1286821:0.00522,(sp1298880:0.00659,sp933944:0.00843):0.00437):0.00962):0.00302):0.01784,(sp1123321:0.04082,(sp1463854:0.02078,(sp943816:0.01691,sp1288080:0.01985):0.00645):0.00628):0.00686):0.00749,(sp1075402:0.05087,(sp1305837:0.01003,sp1380770:0.01883):0.01842):0.00942):0.0111):0.0057):0.00735,(sp1137269:0.01037,sp444103:0.00938):0.04447):0.01339):0.00448):0.01319,(sp1157637:0.02943,(sp380248:0.01288,(sp310780:0.01335,((sp1463856:0.01109,(sp310782:0.0065,sp1380346:0.00397):0.00624):0.00447,(sp1449355:0.01693,sp310781:0.00798):0.00522):0.00516):0.00404):0.01496):0.01361):0.01295,sp1003195:0.03086):0.02123):0.01731,((sp1123320:0.00518,sp159449:0.00625):0.05947,sp479433:0.13179):0.0198):0.02323,sp1996:0.0914):0.03454,((sp1469144:0.07209,sp351607:0.15978):0.01744,(((sp471852:0.05898,(sp1220567:0.02913,((sp1120937:0.02975,(sp58123:0.02434,(sp1220564:0.01623,(sp1220554:0.02434,(sp1993:0.00733,sp1220563:0.01832):0.00807):0.00891):0.00554):0.01188):0.00634,((sp1399798:0.03877,(sp1120936:0.02232,sp561175:0.02729):0.01402):0.00791,sp1220559:0.02179):0.00791):0.02879):0.04063):0.04282,((sp1122192:0.02358,(sp183763:0.07743,(((sp1137268:0.0329,(((sp1205910:0.01371,(sp1348637:0.01621,sp1246461:0.03664):0.00965):0.00432,(sp1245475:0.00714,(sp1237500:0.00634,sp1246448:0.00595):0.00495):0.01223):0.00951,(sp758803:0.02825,(sp2014:0.01563,(sp1718951:0.00495,sp501010:0.01473):0.01119):0.00931):0.0076):0.00631):0.0098,((sp1246445:0.0057,sp1246474:0.00843):0.01694,(sp1352348:0.11534,sp1246485:0.01602):0.04606):0.03721):0.03829,(sp570268:0.03088,sp1236902:0.04302):0.01839):0.00795):0.01673):0.01395,(sp483545:0.01872,(sp665004:0.01116,sp269800:0.03809):0.00879):0.02414):0.11287):0.01677,(((sp469371:0.06377,sp718014:0.02652):0.02013,(sp504805:0.04295,((sp1088767:0.03281,(sp46177:0.01168,(sp568860:0.01514,(sp683260:0.01508,(sp633440:0.0138,(sp1909395:0.00801,sp359159:0.00515):0.002):0.00308):0.00298):0.0039):0.01733):0.01838,(((sp161355:0.01432,(sp2002:0.02645,sp479432:0.01066):0.01167):0.00699,sp35762:0.01214):0.0234,((sp28444:0.00921,sp688067:0.01813):0.03641,((sp46175:0.00903,sp161358:0.01212):0.01232,(sp316330:0.01455,sp58117:0.01896):0.01363):0.00633):0.01216):0.00824):0.01437):0.00988):0.01874,sp35622:0.03641):0.05887):0.04664):0.01506):0.01429):0.01322,(((sp390989:0.09808,(sp1122182:0.0945,((sp1121946:0.0528,sp1121272:0.07725):0.03094,((sp137265:0.05041,(sp405436:0.03366,(((sp47855:0.00745,((sp121616:0.01837,sp47871:0.01189):0.00747,(sp307121:0.00971,(sp1150864:0.00368,sp285676:0.0061):0.01225):0.00403):0.0018):0.00332,((sp1144548:0.02249,sp568872:0.01832):0.00361,((sp47864:0.00632,((sp261654:0.01023,(sp1538294:0.0073,sp47854:0.00537):0.00251):0.00221,(sp745366:0.01476,sp262898:0.01557):0.00359):0.00311):0.00343,(sp47866:0.00617,sp145854:0.00812):0.01302):0.00122):0.00105):0.00272,(((sp1198245:0.01702,(sp391037:0.00716,(sp369723:0.00438,(sp999542:0.00497,sp999543:0.00378):0.00335):0.00822):0.01515):0.00449,(sp547162:0.01046,sp263358:0.00882):0.00502):0.00301,(((sp227316:0.00629,sp1718947:0.00814):0.00787,(sp644283:0.00769,sp946078:0.00928):0.00511):0.00454,(sp145857:0.01424,(sp683228:0.02166,sp47853:0.01365):0.00479):0.00236):0.0015):0.00489):0.01598):0.01281):0.01156,(sp33876:0.06219,((sp1246995:0.02721,(sp1710355:0.00629,sp649831:0.01118):0.01546):0.00698,((sp1120949:0.00727,sp543632:0.01017):0.0138,(sp134676:0.0231,(sp512565:0.01457,(sp35752:0.01227,(sp1869:0.00808,sp113562:0.04883):0.00581):0.00832):0.00664):0.01487):0.00569):0.04983):0.01023):0.01283):0.03064):0.02592):0.01824,(sp446470:0.10617,(sp1089549:0.10588,((sp1463821:0.01315,(sp58114:0.0179,sp380244:0.0206):0.02595):0.02801,(sp1121926:0.01354,sp58116:0.01146):0.02283):0.04055):0.15919):0.05764):0.05737,((sp134849:0.10232,((((sp298654:0.0066,sp683315:0.00611):0.02204,(sp298655:0.00792,(sp1834512:0.00948,sp1834516:0.00968):0.00607):0.01534):0.03775,(sp656024:0.05173,((sp106370:0.01265,(sp710111:0.0035,(sp102891:0.00286,sp326424:0.00206):0.00554):0.00852):0.02422,((sp298653:0.00385,sp365528:0.00346):0.00875,(sp222534:0.01367,(sp269536:0.01035,sp683316:0.00913):0.00688):0.00502):0.03233):0.01129):0.01399):0.09676,(((sp1550230:0.02916,(sp1380393:0.00319,sp477641:0.0022):0.0161):0.00917,((sp1052260:0.00884,(sp1225127:0.02253,sp1566299:0.00814):0.01043):0.00768,(sp1736356:0.01347,sp1736354:0.01932):0.00631):0.02404):0.02625,((sp504800:0.02173,((sp1881103:0.01468,(sp526225:0.00764,(sp1137993:0.0062,sp1137991:0.00697):0.00355):0.00208):0.00882,(sp1861:0.01013,(sp1296565:0.015,(sp1070870:0.02017,(sp1550232:0.00772,sp1190417:0.00411):0.01059):0.00399):0.01651):0.00827):0.00587):0.01068,((sp673521:0.01477,sp1380356:0.01246):0.01623,((sp1380353:0.01507,(sp1380347:0.01746,sp1798228:0.01385):0.00952):0.00714,((sp1146883:0.01295,sp1798227:0.0152):0.00709,(sp1211815:0.01355,(sp1550231:0.00532,sp1550233:0.01998):0.00975):0.01419):0.00402):0.01059):0.00438):0.01275):0.09441):0.01778):0.01358,((sp1283283:0.05973,(sp1882833:0.06708,sp1206085:0.08475):0.01869):0.07718,((sp479431:0.07081,(sp1090615:0.06788,sp1123241:0.07061):0.02514):0.08656,((((sp2017:0.06415,((sp1123244:0.13457,(sp211114:0.06835,(sp65497:0.05267,(sp1612551:0.01317,sp340345:0.01229):0.04741):0.03383):0.01387):0.02519,(((sp485602:0.02641,sp1912961:0.029):0.0411,((sp38312:0.01016,(sp703222:0.01171,(sp1933779:0.0054,sp860235:0.0038):0.00576):0.01049):0.05284,((sp1193682:0.02671,sp909613:0.01712):0.01183,((sp1653480:0.0281,(sp1120934:0.01864,(sp1120935:0.01717,sp155974:0.01304):0.00552):0.01452):0.0121,(sp504798:0.02871,sp1271860:0.01682):0.00385):0.00688):0.02712):0.00884):0.01674,((sp1449976:0.01975,sp345341:0.02836):0.03379,(((sp68170:0.00576,(sp402600:0.00335,sp200378:0.00608):0.00239):0.00183,(sp1586287:0.00779,((sp65499:0.00469,(sp40571:0.00763,sp84724:0.00584):0.00522):0.00362,sp641025:0.00479):0.0022):0.00216):0.03303,(sp446462:0.02411,(sp103733:0.01308,(sp1179773:0.02139,(sp1835005:0.00508,(sp1933778:0.00836,sp1463825:0.00732):0.0058):0.00597):0.00797):0.00702):0.01498):0.02834):0.01404):0.01432):0.00693):0.01397,(((sp1111738:0.03219,sp1111737:0.01571):0.05835,((sp587909:0.03102,((sp1068978:0.03394,(sp1120984:0.03536,sp115433:0.0202):0.00668):0.01014,((sp589385:0.02873,((sp208439:0.00412,(sp31958:0.00426,sp76021:0.00531):0.0019):0.00992,(sp394193:0.01544,((sp330084:0.01331,(sp112413:0.00681,sp1089544:0.00948):0.00474):0.00912,(sp546364:0.00774,(sp218821:0.0063,((sp208445:0.00318,sp287986:0.00243):0.00206,(sp1089545:0.00895,sp749927:0.0029):0.00269):0.00369):0.00479):0.01069):0.00499):0.00706):0.00682):0.01823,(sp1068980:0.02203,sp490629:0.03146):0.01139):0.01041):0.01):0.01315,(sp43354:0.05373,((sp882083:0.02501,sp530584:0.03185):0.01117,(sp882084:0.06454,(sp1962155:0.0298,((sp882086:0.01136,sp882082:0.00797):0.01331,(sp928724:0.00895,sp471857:0.03284):0.00713):0.00835):0.00971):0.00889):0.01291):0.01087):0.01571):0.03881,((sp1050202:0.01698,((sp995062:0.00478,sp1089546:0.00569):0.01884,(sp405564:0.0126,sp995060:0.0128):0.015):0.01041):0.0917,(sp28042:0.0425,(sp405948:0.02752,(sp95161:0.02916,(sp455193:0.0179,(sp418495:0.01019,sp994479:0.00488):0.01105):0.00425):0.01692):0.01304):0.01628):0.05451):0.01269):0.02035,(sp1120948:0.14146,((sp1123025:0.05767,sp1123023:0.04626):0.03929,(sp1848:0.07655,(((sp675635:0.00584,sp1660132:0.02024):0.02016,sp1123024:0.05144):0.01061,((sp2074:0.01379,(sp1690815:0.02268,(sp1096856:0.01283,sp260086:0.02666):0.00771):0.05717):0.01355,sp366584:0.03409):0.02339):0.01652):0.02698):0.02912):0.01765):0.01757,((sp640132:0.02345,sp679197:0.02282):0.16636,(sp443218:0.09153,((((sp499555:0.06852,(sp1077144:0.02234,(sp1785156:0.01374,sp37915:0.01363):0.00923):0.04362):0.05115,(sp1528099:0.11167,((sp1121370:0.08942,(((sp1408189:0.01236,(sp38305:0.00548,sp1487956:0.00257):0.01363):0.03422,(sp1581089:0.00948,sp225326:0.01252):0.02229):0.00735,(sp1437874:0.04809,sp1111729:0.05795):0.016):0.03565):0.02272,(((sp161879:5.0E-4,sp645127:0.00183):0.08383,((sp1404245:0.03045,(sp863239:0.03399,(sp1737425:0.01478,(sp1200352:0.01375,sp858619:0.01382):0.00826):0.01297):0.01488):0.03551,(((sp1581066:0.0077,sp662755:0.00522):0.03019,(sp38289:0.02981,sp1451189:0.02132):0.0106):0.00668,(sp108486:0.02805,sp1267754:0.07313):0.01241):0.01646):0.02044):0.01377,((((sp1121360:0.03194,sp1035195:0.07449):0.01724,(sp1348662:0.03278,sp1431546:0.03264):0.01448):0.00784,sp1050174:0.05219):0.0101,((sp1121356:0.07401,(sp1125779:0.01384,sp39791:0.01009):0.09049):0.02155,(((sp1224164:0.03454,(sp65058:0.01942,sp1717:0.02387):0.0148):0.00769,(sp35755:0.03005,(sp571915:0.02148,sp553207:0.04832):0.02166):0.00901):0.02736,((sp1816684:0.02325,(sp196164:0.02331,(sp1121353:0.01834,(sp931089:0.00618,(sp1718:0.00666,sp1652495:0.01751):0.00787):0.0074):0.01436):0.00707):0.03729,(((((sp43769:0.00625,sp1203624:0.00536):0.09462,(((((sp169292:0.01929,((((sp38301:0.00381,(sp1715017:0.00148,sp548476:0.00131):0.0043):0.0047,(sp1715083:0.00572,sp1739379:0.0099):0.01531):0.0161,(sp1686286:0.02972,sp161895:0.0512):0.01682):0.01739,(sp1203619:0.00148,sp1203566:0.00283):0.02683):0.02131):0.00683,(sp161899:0.02218,(sp146827:0.017,sp28028:0.04016):0.00915):0.01226):0.01114,sp161896:0.02532):0.01168,(sp1581050:0.02654,sp1121364:0.07036):0.01051):0.01049,(sp1285583:0.00903,(sp1705:0.00629,sp1697:0.0156):0.00936):0.03445):0.02146):0.02817,(((sp1121363:0.03401,sp35756:0.0413):0.02088,((sp585529:0.02283,(sp1401064:0.02669,sp1161099:0.02972):0.00679):0.02674,((sp1121354:0.03258,(sp525263:0.01706,sp38302:0.0121):0.02105):0.00972,((sp156976:0.00147,sp1581069:0.00235):0.03796,(sp1720192:0.03102,((sp1203190:0.03028,sp156978:0.03542):0.01015,(sp53374:0.01575,(sp1852390:0.01095,sp38286:0.01101):0.00969):0.02285):0.00688):0.02416):0.00959):0.01863):0.02333):0.05784,(sp1224163:0.07278,(sp1072256:0.05845,sp558173:0.05682):0.02036):0.01472):0.01027):0.02108,(sp1121362:0.04057,(sp136857:0.0282,(sp1224162:0.03285,(sp1610489:0.01114,sp1223515:0.01019):0.01162):0.01648):0.01486):0.01001):0.01794,(sp185761:0.04373,(sp1121355:0.09733,((sp1544413:0.00636,(sp1121365:0.00931,sp1544416:0.00955):0.00373):0.03699,(sp29321:0.13714,(sp191610:0.0685,sp1437875:0.03468):0.03668):0.01306):0.0142):0.02364):0.00933):0.00985):0.00978):0.00982):0.01183):0.0247):0.01889):0.09089):0.02598):0.04288,sp1448389:0.10672):0.01579,(((((sp398843:0.01377,((((sp1051973:8.8E-4,sp1268303:0.00587):0.00123,sp1443905:0.00308):0.00101,sp1564114:0.00285):0.01566,(sp1219029:0.01065,sp1828:0.0121):0.0043):0.00652):0.02703,((sp1736210:0.00937,sp1736300:0.00519):0.01841,(sp53972:0.00304,sp1653478:0.00274):0.0114):0.02538):0.01966,((((sp300028:0.0192,sp1219023:0.04888):0.00923,(sp1833:0.0275,(sp1219020:0.02357,sp37919:0.00501):0.00518):0.0077):0.00712,(sp43767:0.0258,(sp1829:0.01963,((sp1219030:0.00249,sp263849:0.00609):0.01059,(sp1219011:0.01936,sp1570939:0.01379):0.00883):0.0169):0.01346):0.00635):0.00395,((sp260936:0.00565,sp1278078:0.00695):0.01802,(sp1805827:0.01217,sp168276:0.01506):0.01173):0.00818):0.01167):0.02137,(sp1219361:0.06265,(((((sp455432:0.02095,sp1210086:0.02508):0.00919,((sp1210084:0.00406,(sp1210098:0.01119,sp1206731:0.00417):0.00211):0.0186,((sp1056816:0.02282,(sp1210089:0.0131,sp1206744:0.01193):0.00951):0.01398,((sp1206743:0.00649,sp1223548:0.00344):0.00324,(sp1415166:0.01317,sp1210096:0.01251):0.00697):0.00817):0.00783):0.00641):0.004,((sp1406858:0.01983,(sp1210100:0.0271,(((sp1210062:0.01899,sp1210088:0.02691):0.00667,((sp1210077:0.00277,sp1210099:0.01018):0.00554,(sp1206733:0.00698,(sp1206741:0.00284,sp37332:0.01105):0.00515):0.0067):0.00524):0.00479,sp53428:0.02136):0.00551):0.00672):0.00854,sp1160137:0.04483):0.00444):0.01618,((((((sp1141647:0.01331,sp1206735:0.0111):0.00285,(sp1210065:0.01205,(sp1210064:0.00992,sp1133849:0.00484):0.01152):0.00676):0.00347,(sp1824:0.00324,(sp1210069:0.01032,(sp134962:0.00547,(sp1210063:0.0031,sp1736458:0.00358):0.01392):0.00663):0.00329):0.02396):0.00421,(sp1169152:0.03006,(sp1206737:0.00627,((sp1210068:0.00511,sp1223489:0.00382):0.00124,(sp1206723:0.00525,sp1210067:0.00612):0.00277):0.00352):0.00415):0.00793):0.00322,((sp1379680:0.00161,(sp1210101:0.00331,sp1210083:0.0059):0.00307):0.00714,(sp1210090:0.01486,((sp1206730:0.00922,sp1210087:0.00397):0.01161,sp37329:0.00874):0.00538):0.00262):0.00663):0.00423,(sp1210074:0.03058,(sp1127134:0.0183,(((sp1210094:0.00742,sp37328:0.00334):0.01007,(sp1210082:0.01051,(sp1223546:0.00383,(sp1206739:0.00432,sp1223547:0.00297):0.00116):0.00323):0.00354):0.01357,(sp1538463:0.01882,(sp1206725:0.00599,sp1206734:0.01743):0.0164):0.00544):0.00804):0.01191):0.00335):0.00804):0.02869,(sp1123258:0.0909,sp1223536:0.05144):0.01349):0.01546):0.0101):0.01405,((((sp239498:0.01081,(sp57704:0.00367,sp47312:0.00754):0.00273):0.00843,(sp521096:0.00774,sp1151061:0.01597):0.00677):0.06694,(((sp1073574:0.04143,sp1077974:0.03113):0.01321,((sp1223545:0.0271,(sp1075090:0.03714,((sp526226:0.01729,((sp1223543:0.01671,((sp1027371:0.00287,(sp158898:0.00465,(sp2055:5.9E-4,(sp337191:0.00326,sp417102:0.00378):8.0E-4):0.01527):0.00897):0.00298,sp1386969:0.0027):0.01154):0.00977,sp1108045:0.02331):0.00864):0.00372,((sp1112204:0.01621,sp1241906:0.02134):0.00688,(sp122202:0.00593,(sp1220583:0.00378,sp1108044:0.00479):0.00298):0.01808):0.00734):0.00598):0.00598):0.0068,(sp468556:0.0616,(sp1344003:0.04051,(sp1736349:0.04325,(sp258052:0.01206,(sp1172185:0.03149,(sp1889262:0.0016,sp1903117:0.00117):0.01427):0.01169):0.02785):0.00967):0.01232):0.0112):0.006):0.00789,(sp410332:0.03863,(((sp1136941:0.00939,sp1223541:0.00956):0.00982,(sp1437876:0.00518,sp644548:0.00849):0.00567):0.01066,(sp1121928:0.02876,sp1121927:0.06358):0.01618):0.00982):0.02612):0.02845):0.01274,((sp1774:0.00365,((sp948102:0.00562,(sp1578165:0.00259,(sp36809:0.00616,sp83262:0.00339):0.00184):0.00457):0.00481,(sp1855657:0.00161,(sp404941:0.00462,sp1855662:0.00493):0.00151):0.00557):0.00253):0.0489,((((((sp39691:0.00988,(sp710685:0.00708,(sp710687:0.01569,sp75922:0.00823):0.00374):0.01075):0.01312,(sp1834117:0.01247,sp212767:0.01581):0.00935):0.00915,((sp1771:0.02658,((sp1776:0.0115,sp370526:0.01645):0.00786,(((sp1772282:0.005,((sp1772287:0.00221,sp59813:0.00109):0.00304,(sp1772286:0.00426,sp114977:0.00788):0.00103):0.00199):0.004,(sp1834069:0.00221,(sp1834105:0.00992,sp1566885:0.00203):0.00106):0.00385):0.00486,(sp1834149:0.00738,(sp1249101:0.00771,(sp1772275:0.00144,sp1772277:0.00186):0.00179):0.00363):0.0062):0.00572):0.00862):0.00843,(sp81858:0.03188,(sp1797:0.04744,sp1122247:0.04506):0.01402):0.01243):0.00815):0.00498,sp1834077:0.02917):0.01294,(((((sp1736457:0.06464,sp1885026:0.02841):0.01206,(((((((sp1834154:0.00588,sp1834161:0.00348):0.00131,(sp1796:0.00371,(sp1766:0.00377,((sp39693:0.00203,(sp146017:0.00177,sp146018:0.00327):9.6E-4):0.00132,(sp1908205:0.01407,(sp43304:0.00741,(sp1341646:0.00888,(sp1298864:0.00375,sp431269:0.00234):0.00661):0.00389):0.00247):0.00266):0.00118):0.00222):0.00634):0.01274,sp1209984:0.00949):0.00337,((sp1772:0.00362,sp134601:0.00401):0.018,sp59750:0.0134):0.00615):0.00755,((sp1120797:0.00321,sp1157943:0.00257):0.00644,(sp1834109:0.00449,(sp146020:0.00427,sp1927124:0.00259):0.00207):0.00388):0.00993):0.00921,(sp280871:0.00863,sp56689:0.00437):0.04288):0.00385,(((sp564198:0.00786,(sp1570328:0.00278,sp1795:0.00276):0.00462):0.00688,((sp1736504:0.01117,sp1682113:0.0088):0.00583,sp1801:0.02633):0.00903):0.01864,(sp1502745:0.01668,(sp258533:5.4E-4,sp228230:0.00462):0.00851):0.01292):0.01191):0.00618):0.00401,(sp1762962:0.01995,(sp931627:0.01855,((sp1920667:0.00692,sp36814:0.00784):0.00239,(sp1440774:0.01009,sp1545728:0.00964):0.00693):0.00534):0.01289):0.02274):0.013,(((sp710421:0.01692,(sp1807:0.01843,(sp318424:0.00392,(sp1736391:0.00435,sp37916:0.00302):0.00447):0.00687):0.0068):0.00754,((sp1354275:0.01545,(sp350058:0.01228,(sp1791:0.02638,sp912594:0.0165):0.00577):0.01089):0.00599,(sp39692:0.01508,sp350054:0.01576):0.00682):0.0081):0.01456,((sp1936029:0.01402,sp1879023:0.0096):0.03732,((sp28047:0.0098,sp1834121:0.0056):0.01912,(sp444597:0.02286,(sp85968:0.03205,sp1793:0.01875):0.00647):0.0229):0.00763):0.0076):0.00917):0.00368,(sp1380386:0.03846,(sp1834111:0.02551,((sp126673:0.01249,sp164757:0.00518):0.00134,(sp1772283:0.01511,(sp1772284:0.01107,sp1772285:0.00286):0.00381):0.00328):0.01037):0.01525):0.0096):0.00729):0.00743,(((sp1069220:0.02815,(sp1834076:0.00738,sp1798:0.00566):0.02438):0.03227,(((sp875328:0.00624,(sp1108812:0.01056,((sp1118379:0.00682,sp342002:0.00109):0.00771,((sp1782:0.00898,(sp188915:0.00227,sp29314:0.00822):0.00729):0.00991,(sp512402:0.00556,(sp1370120:0.00136,sp1792835:0.00772):0.00308):0.00172):0.00162):0.00744):0.01118):0.01003,(sp386913:0.01299,sp1788:0.00851):0.00193):0.00294,sp354243:0.00728):0.02526):0.0074,(sp1834073:0.0427,(((sp29313:0.01817,(sp459858:0.00884,(sp110505:0.00701,sp1789:0.00569):0.01565):0.02533):0.0068,((sp487514:0.00992,sp1260918:0.02976):0.00813,(sp28045:0.00712,sp43348:0.00347):0.00369):0.0067):0.00796,((sp1834097:0.00376,sp1856861:0.00304):0.01261,(((sp1834160:0.00409,sp1834158:0.00121):0.01798,((((sp1834143:0.00844,sp1834137:0.00684):0.009,sp153971:0.01599):0.00237,((sp324058:0.01632,((sp1834082:0.0033,(sp1834066:0.00211,(sp1743230:0.00487,sp1856862:0.00272):0.00504):9.7E-4):0.0038,(sp767916:0.00393,(sp1834092:0.01025,(sp1841859:0.00214,sp33895:0.00232):0.0017):0.00103):0.00427):0.00478):0.00418,(((sp1780:0.01511,(sp1834123:0.02342,(((sp1784:0.01,sp243061:0.005):0.01105,(sp1834067:0.01005,(sp141349:0.0056,(sp292462:0.00653,(sp1408452:0.00831,sp47839:0.00201):0.00646):0.01019):0.00916):0.00373):0.00962,(sp1841861:0.01876,sp1841860:0.02266):0.01023):0.00813):0.00635):0.00371,(sp185642:0.02192,(sp220927:0.01948,sp56425:0.01519):0.00405):0.00661):0.00595,(sp1834094:0.01348,sp53376:0.01949):0.00591):5.5E-4):0.00861):0.00286,((sp1834119:0.00696,(sp761804:0.00475,(sp244292:0.00704,((sp1783:0.00238,(sp1834129:0.00148,(sp1834128:0.00303,sp53378:0.00227):0.00132):0.00264):0.00224,(sp590652:0.0036,(sp1834138:0.00494,(sp1834144:0.00128,(sp1834112:0.00226,sp1834116:0.00353):0.00102):0.00136):0.00604):0.00103):0.00218):0.00178):0.0018):0.00964,(sp1764:0.01202,(sp560555:0.00415,((sp1834106:0.00675,sp1834134:0.00762):0.0018,(sp547163:0.00606,((sp1834078:0.00376,sp1834089:0.01209):0.00117,((sp1041522:0.0037,(sp339268:0.00564,sp1834081:0.00643):5.6E-4):0.00102,(sp1834083:0.01109,(sp222805:0.00457,sp701042:0.00425):0.00337):0.01155):0.00125):0.0087):0.00193):0.00201):0.01004):0.01016):0.0096):0.00454):0.00539,((sp44010:0.02476,(sp1202450:0.00373,(sp480418:0.02123,sp272631:0.01618):0.01688):0.00917):0.00524,(sp169765:0.01547,(((sp1768:0.00666,sp1777:0.00567):0.01474,(sp28445:0.02519,(sp486698:0.01132,(sp362242:0.02412,(sp1787:0.02294,(sp1778:0.01269,sp1790:0.01539):0.00704):0.00449):0.00443):0.00911):0.00236):0.00567,(sp1430326:0.01162,sp83332:0.01329):0.00593):0.0035):0.00287):0.0049):0.00414):0.01742):0.00912):0.00694):0.01605):0.03196):0.05297):0.01511):0.01405):0.01557):0.02281):0.04214):0.02251):0.02789):0.03016):0.0091):0.04386):0.01571):0.05145):0.16358):0.05951):0.03682):0.03565):0.09649):0.03071):0.04476):0.05537):0.10566):0.25138167,((sp251221:0.12447,sp1183438:0.04915):0.20618,(((((sp395961:0.11351,(sp197221:0.0931,sp195253:0.09283):0.05988):0.04842,((sp1880902:9.0E-4,sp1890733:0.00377):0.13948,(sp1140:0.10894,(sp316278:0.0606,((((sp1499502:0.00382,sp59922:0.00411):0.0401,(((sp167555:0.00876,sp1501269:0.00606):0.06628,(((((sp93060:0.00848,((((sp1471522:0.00747,sp74546:0.01202):0.00189,sp93057:0.01142):0.002,((sp146891:0.0057,sp1924286:0.00356):8.5E-4,(sp1471469:0.00413,(sp1501268:0.00384,(sp1471493:0.00471,sp167548:0.00585):8.8E-4):5.5E-4):5.4E-4):0.00129):0.00143,(sp167546:0.00496,sp1471463:0.00704):0.00162):0.00197):0.00266,sp1219:0.00837):0.00388,sp59921:0.00997):0.02199,(sp167542:0.01611,sp59919:0.01696):0.01916):0.02382,(sp1041938:0.03927,sp1041939:0.04688):0.01868):0.11714):0.02292,((sp167539:0.03326,sp1499499:0.06635):0.03761,(sp93059:0.04753,sp1499498:0.04811):0.01624):0.01824):0.03762):0.01614,((((sp110663:0.01356,sp1280380:0.01173):0.01944,(sp585423:0.01927,sp84588:0.01829):0.00422):0.00535,((sp585425:0.00561,(sp110662:0.00302,sp166314:0.00421):0.002):0.01443,(sp313625:0.0023,sp316279:0.00393):0.03096):0.00727):0.02892,((sp221360:0.023,sp221359:0.02107):0.00821,(((sp1801629:0.00458,sp1801630:0.00559):0.02552,(sp32051:0.00449,sp59931:0.00868):0.01093):0.00617,(sp64471:0.00236,sp32052:0.00303):0.03827):0.00832):0.00715):0.01035):0.03023,((sp180281:0.03497,(sp232348:0.01102,sp232363:0.03524):0.03419):0.01522,((sp1496688:0.02118,sp292564:0.01547):0.02988,sp1916956:0.07588):0.01563):0.01785):0.03148):0.19068):0.07227):0.02971):0.01524,(((sp203124:0.1534,sp1705388:0.11434):0.02969,(sp1641165:0.16373,sp1803587:0.14391):0.03482):0.00454,((((sp1781255:0.0883,sp1925591:0.11976):0.04498,((((sp1128427:0.11112,sp1173029:0.09538):0.06537,((((sp43989:0.08061,(sp1981054:0.05802,sp41431:0.05149):0.02526):0.04465,((sp1921803:0.00836,sp118163:0.00539):0.06537,(sp65393:0.04027,sp497965:0.05072):0.06154):0.02099):0.01884,(((sp292563:0.01365,sp1562720:0.02421):0.05386,(sp755178:0.06403,(sp1615909:0.02658,(sp113355:0.02452,sp1617448:0.01705):0.01244):0.03404):0.02138):0.12133,sp102232:0.14541):0.03171):0.01632,(sp111780:0.0726,((sp1541065:0.08237,sp118161:0.07275):0.03413,sp102125:0.09839):0.02132):0.05362):0.03057):0.03946,(sp1173027:0.07145,(sp118168:0.10125,sp1458985:0.08212):0.01869):0.02646):0.02397,((sp1173022:0.07362,sp1173020:0.17155):0.02993,(sp454136:0.11397,(((sp1173026:0.0019,sp247279:0.00404):0.07117,(sp251229:0.09057,(sp1618023:0.03565,sp927677:0.06756):0.04521):0.01441):0.01954,((((((sp313624:0.06002,((sp551115:0.03044,(sp272123:0.02432,(sp163908:0.00689,sp1853259:0.00742):0.01812):0.00719):0.00767,((sp533240:0.00314,sp533247:0.00793):0.05752,(sp398007:0.02009,(sp46234:0.01266,sp1647413:0.00636):0.01237):0.03798):0.00674):0.0137):0.0071,((sp1188:0.03082,(sp643473:0.03332,sp99598:0.02451):0.01186):0.00819,(sp63737:0.03629,sp56107:0.03769):0.01081):0.00629):0.01518,((sp1881015:0.01715,sp317936:0.0197):0.02448,((sp1751286:0.01682,(sp103690:0.00485,sp240292:0.00353):0.01336):0.01948,(sp52271:0.02586,sp28072:0.02115):0.0143):0.01103):0.00812):0.01679,((sp1469607:0.05577,(sp1170562:0.06552,(sp1137096:0.00591,sp32057:0.00515):0.06636):0.02529):0.01122,sp1337936:0.06858):0.00893):0.00968,(((sp1173024:0.01805,((sp1752063:0.00984,sp306281:0.00337):0.00582,(sp1174528:0.01114,sp1173023:0.0097):0.01234):0.0194):0.00999,(sp211165:0.01532,sp1173021:0.05878):0.01538):0.01794,((sp1479485:0.01315,sp128403:0.01767):0.0379,(sp221288:0.03476,sp1137095:0.02339):0.0161):0.01251):0.01442):0.01392,(sp371196:0.07116,sp373994:0.09157):0.0422):0.03045):0.0308):0.01463):0.01611):0.01191):0.01046,((((sp459495:0.00667,sp1738638:0.02445):0.09816,(sp671072:0.01729,(sp1729650:0.00536,(sp1805291:0.01239,sp388467:0.00841):0.00344):0.03049):0.07189):0.04167,(sp402777:0.05339,(sp179408:0.00294,sp756067:0.00457):0.0613):0.05295):0.02644,(sp1173028:0.09199,sp56110:0.115):0.0227):0.0135):0.01044,((((sp317619:0.17932,(((sp1229172:0.01209,(sp549789:0.025,sp118166:0.0175):0.00917):0.10628,(sp1574623:0.09161,sp1173264:0.0885):0.03159):0.01871,(sp1666911:0.12492,(sp102129:0.01797,sp1385935:0.02553):0.09779):0.05235):0.04468):0.01918,(sp111611:0.1949,(sp1666905:0.10977,sp1643526:0.06821):0.06508):0.02454):0.0135,(sp195250:0.27204,sp329726:0.13468):0.04732):0.0163,(((sp864702:0.08743,((sp1920490:0.01602,sp1850361:0.01712):0.06944,(sp272134:0.03051,(sp1752064:0.00969,sp1552121:0.02005):0.02587):0.07283):0.04799):0.02047,(sp1922337:0.11588,(sp1487953:0.10095,sp1080068:0.09101):0.02733):0.0112):0.01634,sp1173025:0.11382):0.0165):0.00655):0.06158):0.01188):0.01566,((sp1934309:0.13189,(sp1188229:0.21452,(sp321327:0.03067,sp321332:0.02434):0.22611):0.05026):0.0468,(sp1805292:0.13272,(sp82654:0.1571,(sp118173:0.07234,sp1173263:0.12962):0.02532):0.02207):0.09346):0.01671):0.02227,((sp582515:0.13825,(sp65093:0.03827,sp13035:0.04087):0.10116):0.05807,((sp213618:0.13067,((sp1147:0.00387,sp1148:0.00482):0.12505,(sp1228987:0.09635,(sp1527444:0.01884,sp1453429:0.0277):0.09862):0.03684):0.02284):0.03366,(sp129961:0.13298,((sp454133:0.01597,sp111781:0.01964):0.03326,(sp1407650:0.0366,(sp32049:0.00293,sp374981:0.00293):0.01078):0.01767):0.10077):0.02361):0.01909):0.03429):0.144):0.005388345);
