# Supplementary material for: Ancestral reconstruction of duplicated signaling proteins reveals the evolution of signaling specificity
Source: eLife journal article supplement (doi:10.7554/elife.77346), 2022-06-10
Supplement: supp [file elife-77346-supp-v1.zip › elife_poa_e77346_Supplementary_file_3.txt]

((1463856.SAMN02645493.GCA_000721495_03825|1463856.SAMN02645493.GCA_000721495_03826:0.53790,(((1519492.SAMN02900644.ADL03_02515|1519492.SAMN02900644.ADL03_02520:0.25298,((1581066.SAMN03436213.HMPREF3098_04185|1581066.SAMN03436213.HMPREF3098_04180:0.40486,1224162.SAMN02800399.B840_03425|1224162.SAMN02800399.B840_03420:0.30515)58.15:0.16473,(1219361.SAMD00046497.GCA_001552615_03137|1219361.SAMD00046497.GCA_001552615_03136:0.27546,43348.SAMN06064235.BST20_10755|43348.SAMN06064235.BST20_10750:0.22358)10.63:0.08033)19.12:0.09745)26.97:0.09785,686624.SAMN04488242.SAMN04488242_0347|686624.SAMN04488242.SAMN04488242_0346:0.59466)37.01:0.17672,(208445.SAMN04489727.SAMN04489727_6083|208445.SAMN04489727.SAMN04489727_6082:0.48174,(1855351.SAMN05216482.SAMN05216482_5405|1855351.SAMN05216482.SAMN05216482_5404:0.72719,455432.SAMN04426989.AWN90_25250|455432.SAMN04426989.AWN90_25255:0.60371)35.63:0.22577)12.18:0.06368)3.95:0.04448)20.12:0.76203,((278961.SAMN02787029.GCA_000800015_03310|278961.SAMN02787029.GCA_000800015_03311:1.26645,((((1305731.SAMN03351827.GCA_000934705_00312|1305731.SAMN03351827.GCA_000934705_00311:0.93173,(1806484.SAMEA2247603.ERS370013_03638|1806484.SAMEA2247603.ERS370013_03639:0.85646,1392877.SAMN05216221.SAMN05216221_2161|1392877.SAMN05216221.SAMN05216221_2159:0.74229)8.50:0.10044)4.94:0.08964,((((1761899.SAMN04488595.SAMN04488595_11882|1761899.SAMN04488595.SAMN04488595_11883:0.55526,(1798182.SAMN04487799.GA0061081_104141|1798182.SAMN04487799.GA0061081_104140:0.38926,1109412.SAMEA3201438.BN1221_00604c|1109412.SAMEA3201438.BN1221_00605c:0.42235)62.95:0.28717)64.37:0.24570,(1331671.SAMN02604103.L483_13895|1331671.SAMN02604103.L483_13890:0.65233,(702114.SAMN04555167.A1355_20555|702114.SAMN04555167.A1355_20550:0.49402,1122236.SAMN02440991.GCA_000378225_01603|1122236.SAMN02440991.GCA_000378225_01602:0.85820)8.88:0.08778)7.63:0.07396)62.25:0.16264,(966.SAMN06114004.BTA35_0201325|966.SAMN06114004.BTA35_0201330:0.88477,1163407.SAMN02469836.UU7_08733|1163407.SAMN02469836.UU7_08738:0.83514)6.59:0.16707)19.09:0.07111,((45658.SAMN05225364.VSVS12_01806|45658.SAMN05225364.VSVS12_01807:1.33195,((326297.SAMN02598298.Sama_3433|326297.SAMN02598298.Sama_3432:0.52403,(654.SAMN04012505.AMS64_01265|654.SAMN04012505.AMS64_01270:0.55996,((659.SAMN04507566.AYY26_12265|659.SAMN04507566.AYY26_12260:0.22094,1647102.SAMN03565815.ZX61_01775|1647102.SAMN03565815.ZX61_01780:0.23378)1.97:0.20650,((155515.SAMN02344111.JP36_06405|155515.SAMN02344111.JP36_06400:0.39630,505317.SAMN03145057.OA57_11570|505317.SAMN03145057.OA57_11575:0.27638)7.45:0.21753,(1006004.SAMN02742621.GBAG_4264|1006004.SAMN02742621.GBAG_4265:0.06290,511145.SAMN02604091.b3911|511145.SAMN02604091.b3912:0.02232)78.84:0.30598)29.93:0.08303)77.48:0.20108)11.48:0.07898)36.18:0.12469,(28229.SAMN02989439.ND2E_2027|28229.SAMN02989439.ND2E_2028:0.64264,1929465.SAMN06142981.GCA_001938545_01261|1929465.SAMN06142981.GCA_001938545_01260:0.74571)31.91:0.14990)11.54:0.07857)5.83:0.06541,45065.SAMN04274774.Lgee_1773|45065.SAMN04274774.Lgee_1772:0.65279)5.51:0.08724)4.79:0.05734)12.59:0.06182,(301.SAMN02834833.GCA_000732445_03080|301.SAMN02834833.GCA_000732445_03081:0.36219,53408.SAMN05178539.A9C11_06915|53408.SAMN05178539.A9C11_06920:0.58598)76.05:0.86815)2.38:0.03975,(1635274.SAMN03445176.XE01_1445|1635274.SAMN03445176.XE01_1447:0.72662,234267.SAMN02598277.Acid_7044|234267.SAMN02598277.Acid_7043:0.49064)4.99:0.10856)1.83:0.03216)41.51:0.17829,((((1921010.SAMD00053330.MMIC_P0095|1921010.SAMD00053330.MMIC_P0094:0.50402,((1945521.SAMEA79694668.A1232T_00726|1945521.SAMEA79694668.A1232T_00725:1.03247,1261617.SAMN02441676.GCA_000383895_00672|1261617.SAMN02441676.GCA_000383895_00671:0.35648)8.86:0.12811,(1205680.PRJEB111.GCA_000312425_05221|1205680.PRJEB111.GCA_000312425_05222:0.40417,(1706231.SAMEA3663004.BN3177_7301|1706231.SAMEA3663004.BN3177_7303:0.37841,(1566275.SAMN03159379.SAMN03159379_01958|1566275.SAMN03159379.SAMN03159379_01957:0.23319,1797564.SAMN04316052.A3I64_18840|1797564.SAMN04316052.A3I64_18845:0.26041)105.54:0.22985)13.21:0.07342)2.58:0.16937)5.96:0.07010)110.60:0.28015,(83449.SAMN06011414.BON30_08710|83449.SAMN06011414.BON30_08715:0.83491,1391654.SAMN03951129.AKJ09_11163|1391654.SAMN03951129.AKJ09_11164:0.83018)7.08:0.11201)1.25:0.06224,(((316.SAMN03765687.AB691_2793|316.SAMN03765687.AB691_2794:0.34613,(1882734.SAMN05438986.BC443_09435|1882734.SAMN05438986.BC443_09440:0.36439,1122616.SAMN02441143.GCA_000422425_00965|1122616.SAMN02441143.GCA_000422425_00964:0.25150)8.08:0.13474)49.94:0.18430,(1123033.SAMN02441319.GCA_000382145_00561|1123033.SAMN02441319.GCA_000382145_00560:0.19369,(1055815.SAMN02597462.GCA_000511065_01076|1055815.SAMN02597462.GCA_000511065_01073:0.11354,34061.SAMN06308730.B0189_05165|34061.SAMN06308730.B0189_05155:0.19307)393.89:0.59340)60.95:0.27600)83.79:0.23883,((((((1563157.SAMN04193521.AQS70_15635|1563157.SAMN04193521.AQS70_15640:0.60872,(1121480.SAMN02440629.GCA_000425385_01180|1121480.SAMN02440629.GCA_000425385_01183:0.67052,95486.SAMN02796570.DM40_1988|95486.SAMN02796570.DM40_1989:0.56770)4.51:0.07176)48.52:0.15341,(208964.SAMN02603714.PA1798|208964.SAMN02603714.PA1799:0.21687,1292031.SAMN02441181.GCA_000425805_00921|1292031.SAMN02441181.GCA_000425805_00922:0.29189)193.81:0.40206)41.08:0.12275,(1686310.SAMN04505061.BBC0122_018620|1686310.SAMN04505061.BBC0122_018610:1.60600,(1938604.SAMN06256473.BXU06_02750|1938604.SAMN06256473.BXU06_02755:0.48589,(511145.SAMN02604091.b1609|511145.SAMN02604091.b1608:0.51994,1229489.SAMN02471194.GCA_000335715_02805|1229489.SAMN02471194.GCA_000335715_02804:0.46927)21.72:0.14935)48.27:0.24321)2.16:0.11466)8.83:0.03574,(1122240.SAMN02952990.GCA_000620105_02228|1122240.SAMN02952990.GCA_000620105_02229:0.78786,(1454000.SAMN02445069.AW07_02835|1454000.SAMN02445069.AW07_02836:0.38201,134537.SAMN03174512.OI25_6560|134537.SAMN03174512.OI25_6558:0.69520)18.25:0.12842)6.24:0.18014)7.60:0.04615,((1798299.SAMN04315932.A3H44_05810|1798299.SAMN04315932.A3H44_05805:0.72249,(1816219.SAMN04562547.A3Q33_19925|1816219.SAMN04562547.A3Q33_19930:0.74357,((173990.SAMN05660691.SAMN05660691_00537|173990.SAMN05660691.SAMN05660691_00536:0.57702,(1526571.SAMN04324273.AT746_17240|1526571.SAMN04324273.AT746_17245:0.62754,1917165.SAMN06007765.GCA_001957175_02065|1917165.SAMN06007765.GCA_001957175_02064:0.69474)3.95:0.06482)10.28:0.08226,314608.SAMN02436096.KT99_20436|314608.SAMN02436096.KT99_20441:0.81079)5.43:0.05972)9.37:0.08104)16.86:0.08500,((43658.SAMN04320552.AT705_00335|43658.SAMN04320552.AT705_00340:0.45985,1888913.SAMN06670374.GCA_002104475_02616|1888913.SAMN06670374.GCA_002104475_02617:0.76186)76.12:0.31186,(58049.SAMN04255090.CMT41_05410|58049.SAMN04255090.CMT41_05405:0.48281,325240.SAMN02598299.Sbal_0750|325240.SAMN02598299.Sbal_0749:0.84646)37.75:0.16777)123.40:0.28823)1.66:0.04476)14.27:0.07151,(914150.SAMN03323776.TQ33_1303|914150.SAMN03323776.TQ33_1302:1.17358,((28229.SAMN02989439.ND2E_2089|28229.SAMN02989439.ND2E_2088:1.14251,1331007.SAMD00036740.AALB_1290|1331007.SAMD00036740.AALB_1291:0.85428)17.97:0.24839,(1903952.SAMN05792409.BIT28_22735|1903952.SAMN05792409.BIT28_22740:0.49158,212667.SAMN02666092.VFDL14_07170|212667.SAMN02666092.VFDL14_07165:0.67286)128.36:0.40216)3.29:0.11277)8.05:0.10889)7.46:0.06902)246.48:0.37417)13.19:0.06551,(((((1736590.SAMN04155859.ASD94_05545|1736590.SAMN04155859.ASD94_05540:0.44142,(1218074.SAMD00000367.GCA_000684975_04047|1218074.SAMD00000367.GCA_000684975_04046:0.42817,28095.SAMN03010439.BM43_6516|28095.SAMN03010439.BM43_6517:0.49151)128.35:0.38817)44.19:0.17569,(((649.SAMEA2752419.GCA_000819865_00683|649.SAMEA2752419.GCA_000819865_00684:0.49845,((675816.SAMN02393817.VIA_000579|675816.SAMN02393817.VIA_000578:0.25366,(587.SAMN05734415.RB151_002720|587.SAMN05734415.RB151_002710:0.18102,511145.SAMN02604091.b3404|511145.SAMN02604091.b3405:0.08016)53.83:0.14630)46.71:0.11333,(1123054.SAMN02441649.GCA_000382165_02631|1123054.SAMN02441649.GCA_000382165_02632:0.28447,(314276.SAMN02436083.OS145_02045|314276.SAMN02436083.OS145_02050:0.33451,(323850.SAMN00623064.Shew_3638|323850.SAMN00623064.Shew_3637:0.24345,(28108.SAMN03835502.ACZ81_19240|28108.SAMN03835502.ACZ81_19235:0.28790,(1816218.SAMN04562546.A3Q34_12410|1816218.SAMN04562546.A3Q34_12405:0.23233,43657.SAMN02953434.JL49_16040|43657.SAMN02953434.JL49_16035:0.25091)26.49:0.07038)0.14:0.01864)2.56:0.03406)0.61:0.04237)29.98:0.08674)2.83:0.05837)49.68:0.17305,(1646498.SAMN04008121.AMQ28_09515|1646498.SAMN04008121.AMQ28_09520:0.48280,(1434072.SAMN05216210.SAMN05216210_2887|1434072.SAMN05216210.SAMN05216210_2886:0.24818,(89065.SAMN05216605.SAMN05216605_12011|89065.SAMN05216605.SAMN05216605_12010:0.18932,1680762.SAMN04450862.AXE65_13075|1680762.SAMN04450862.AXE65_13070:0.26951)28.99:0.09031)62.31:0.17706)28.18:0.13658)46.13:0.15029,(1978760.SAMN06189372.BVN34_06075|1978760.SAMN06189372.BVN34_06070:0.59388,((1261621.SAMN02441344.GCA_000378245_02308|1261621.SAMN02441344.GCA_000378245_02309:0.42628,(876478.SAMN03840742.GCA_001418245_00590|876478.SAMN03840742.GCA_001418245_00589:0.63563,1691980.SAMN03940017.GCA_001307855_03101|1691980.SAMN03940017.GCA_001307855_03102:0.46561)1.13:0.05661)38.78:0.12333,((1538295.SAMN03075592.JY96_03265|1538295.SAMN03075592.JY96_03260:0.25317,(1100721.SAMEA3719354.GCA_001517545_00868|1100721.SAMEA3719354.GCA_001517545_00869:0.30764,1566275.SAMN03159379.SAMN03159379_03950|1566275.SAMN03159379.SAMN03159379_03949:0.24904)2.07:0.04152)193.81:0.30378,((1926494.SAMN06114787.BTO02_12325|1926494.SAMN06114787.BTO02_12320:0.37934,(1121388.SAMN02440752.GCA_000482785_01817|1121388.SAMN02440752.GCA_000482785_01816:0.34617,1798195.SAMN04515617.SAMN04515617_11964|1798195.SAMN04515617.SAMN04515617_11965:0.29981)2.13:0.07751)15.53:0.07090,(85698.SAMN03996290.AL504_12330|85698.SAMN03996290.AL504_12325:0.22121,1122619.SAMN02441372.GCA_000373745_00652|1122619.SAMN02441372.GCA_000373745_00653:0.36578)102.44:0.20195)10.53:0.04559)82.12:0.16314)7.93:0.05546)16.12:0.08212)8.73:0.06352)6.77:0.06877,(160660.SAMN05853496.BJI67_08690|160660.SAMN05853496.BJI67_08685:0.72865,1895869.SAMN05660637.BGP24_12440|1895869.SAMN05660637.BGP24_12445:0.70352)3.17:0.09197)10.65:0.09091,(((398527.SAMN02598395.Bphyt_6994|398527.SAMN02598395.Bphyt_6993:0.48327,(1268285.SAMN02470060.GCA_000341045_05717|1268285.SAMN02470060.GCA_000341045_05718:0.35725,1169143.SAMN02440516.GCA_000383275_05595|1169143.SAMN02440516.GCA_000383275_05596:0.33361)101.08:0.29292)7.44:0.11722,(1795043.SAMN04453248.AXG89_10435|1795043.SAMN04453248.AXG89_10430:0.32250,(93219.SAMN04316854.AT302_02455|93219.SAMN04316854.AT302_02450:0.31151,1539142.SAMN03261525.RM96_25410|1539142.SAMN03261525.RM96_25405:0.28262)108.39:0.27376)13.75:0.10893)179.80:0.37865,(520.SAMN05770316.BH373_17725|520.SAMN05770316.BH373_17720:0.82038,279714.SAMN00001906.FuraDRAFT_2551|279714.SAMN00001906.FuraDRAFT_2552:0.53041)4.07:0.11612)10.63:0.09634)84.02:0.19682,((244582.SAMN02996431.GCA_000757605_00998|244582.SAMN02996431.GCA_000757605_00997:0.81628,(((856793.SAMN02604252.MICA_945|856793.SAMN02604252.MICA_944:0.48835,((1282362.SAMN02469918.AEAC466_20795|1282362.SAMN02469918.AEAC466_20800:0.38416,(190650.SAMN02604005.CC_2932|190650.SAMN02604005.CC_2931:0.22817,1660129.SAMN03652473.ABS78_18045|1660129.SAMN03652473.ABS78_18050:0.20130)26.33:0.11681)47.79:0.16030,(582402.SAMN02598497.Hbal_0313|582402.SAMN02598497.Hbal_0314:0.56422,568102.SAMN06670198.GCA_002088935_02123|568102.SAMN06670198.GCA_002088935_02122:0.36720)56.40:0.22985)32.59:0.13486)1.36:0.02622,((1122125.SAMN02441506.GCA_000423185_03985|1122125.SAMN02441506.GCA_000423185_03986:0.38891,(1267005.SAMN02440966.GCA_000383415_00847|1267005.SAMN02440966.GCA_000383415_00848:0.38263,((1040989.SAMN02441123.GCA_000472385_00257|1040989.SAMN02441123.GCA_000472385_00258:0.24300,(395965.SAMN00000045.Msil_2512|395965.SAMN00000045.Msil_2511:0.30124,(1036779.SAMN04515666.SAMN04515666_107295|1036779.SAMN04515666.SAMN04515666_107296:0.18956,441620.SAMN00000038.Mpop_2612|441620.SAMN00000038.Mpop_2613:0.31255)15.75:0.05716)14.78:0.04353)32.21:0.09531,((388408.SAMEA3495742.LAX5112_04138|388408.SAMEA3495742.LAX5112_04137:0.37188,1122133.SAMN02745157.SAMN02745157_1772|1122133.SAMN02745157.SAMN02745157_1771:0.26668)8.97:0.04981,((1860096.SAMN05213933.A9Z06_23620|1860096.SAMN05213933.A9Z06_23615:0.28401,(1134510.SAMN00778953.O9A_01274|1134510.SAMN00778953.O9A_01273:0.31611,1854058.SAMN05178588.A9K66_10040|1854058.SAMN05178588.A9K66_10045:0.14739)23.79:0.07087)11.90:0.03762,(472175.SAMN06199440.GCA_001953055_02335|472175.SAMN06199440.GCA_001953055_02334:0.34605,370622.SAMN03022368.LA66_02920|370622.SAMN03022368.LA66_02925:0.26249)10.52:0.04734)105.63:0.12826)11.32:0.05452)19.77:0.10197)102.75:0.18768)1.85:0.03174,(1293891.SAMN02671744.TMES_11955|1293891.SAMN02671744.TMES_11960:0.43193,1437059.SAMN04851435.A6A05_09180|1437059.SAMN04851435.A6A05_09175:0.31845)42.99:0.16661)5.33:0.05761)32.10:0.10688,(1214225.SAMN02469423.MXAZACID_13601|1214225.SAMN02469423.MXAZACID_13606:0.31145,(272568.SAMN02598444.Gdia_3288|272568.SAMN02598444.Gdia_3287:0.21029,1234671.SAMD00008625.GCA_000613285_01416|1234671.SAMD00008625.GCA_000613285_01414:0.36831)86.59:0.20647)75.39:0.19289)2.82:0.08250)134.78:0.35392,(1523423.SAMN02927140.IP79_07035|1523423.SAMN02927140.IP79_07030:0.93608,((1219051.SAMD00046727.GCA_001598435_01616|1219051.SAMD00046727.GCA_001598435_01617:0.87943,(260084.SAMN02927928.SAMN02927928_1588|260084.SAMN02927928.SAMN02927928_1587:0.81438,((1843236.SAMN05928587.GCA_001956315_01331|1843236.SAMN05928587.GCA_001956315_01332:0.65225,1938607.SAMN06263770.BXU08_19360|1938607.SAMN06263770.BXU08_19365:0.66106)4.16:0.03498,(190650.SAMN02604005.CC_1181|190650.SAMN02604005.CC_1182:0.36069,(1470591.SAMN02676630.BW41_02644|1470591.SAMN02676630.BW41_02645:0.50792,1502775.SAMN02799626.SAMN02799626_03192|1502775.SAMN02799626.SAMN02799626_03193:0.78330)3.93:0.05988)5.77:0.05400)30.93:0.09878)6.38:0.07288)30.07:0.14112,(((((1736387.SAMN04151777.ASG60_02590|1736387.SAMN04151777.ASG60_02595:0.40309,(1855306.SAMN05216367.SAMN05216367_5001|1855306.SAMN05216367.SAMN05216367_5000:0.21034,172088.SAMN02441514.GCA_000426785_01423|172088.SAMN02441514.GCA_000426785_01424:0.36432)45.20:0.14957)20.11:0.14128,(359.SAMN02787063.GCA_000745735_05519|359.SAMN02787063.GCA_000745735_05520:0.63014,((1144310.SAMN00839618.PMI07_005108|1144310.SAMN00839618.PMI07_005107:0.37782,(384.SAMN02787141.GCA_000799975_03901|384.SAMN02787141.GCA_000799975_03900:0.43505,1336249.SAMN02584975.GCA_000518585_04754|1336249.SAMN02584975.GCA_000518585_04755:0.48955)16.80:0.12206)33.67:0.14181,1692241.SAMN03943231.AKG11_28765|1692241.SAMN03943231.AKG11_28770:0.59549)3.26:0.07172)141.16:0.32010)16.41:0.11427,1156985.SAMN04488118.SAMN04488118_11185|1156985.SAMN04488118.SAMN04488118_11186:1.32204)2.26:0.04919,(1856850.SAMN05958284.GCA_001931685_03081|1856850.SAMN05958284.GCA_001931685_03080:0.41012,(536019.SAMN02232036.Mesop_3244|536019.SAMN02232036.Mesop_3245:0.27044,(464029.SAMN05832484.BJF93_08920|464029.SAMN05832484.BJF93_08915:0.48404,1882772.SAMN05443582.SAMN05443582_105311|1882772.SAMN05443582.SAMN05443582_105310:0.34371)10.13:0.10002)16.97:0.14843)394.94:0.62893)14.34:0.05891,(((((1123060.SAMN02745777.GCA_000711725_01409|1123060.SAMN02745777.GCA_000711725_01410:0.23877,(435.SAMN04396917.A0U92_07760|435.SAMN04396917.A0U92_07765:0.32986,290633.SAMN02603293.GOX1599|290633.SAMN02603293.GOX1600:0.26918)12.16:0.06651)221.44:0.25207,((871651.SAMN05421688.SAMN05421688_1942|871651.SAMN05421688.SAMN05421688_1941:0.58645,((1844758.SAMN04932542.GCA_001683845_01809|1844758.SAMN04932542.GCA_001683845_01808:0.27549,1044.SAMN02737001.EH31_15285|1044.SAMN02737001.EH31_15280:0.34350)118.42:0.32290,(13690.SAMN04489739.AX777_03155|13690.SAMN04489739.AX777_03160:0.21283,1752232.SAMN04254528.GCA_001464615_00620|1752232.SAMN04254528.GCA_001464615_00619:0.25133)48.73:0.19476)116.68:0.29742)18.18:0.10655,(1577896.SAMN03246059.RA20_02645|1577896.SAMN03246059.RA20_02650:0.65586,(121719.SAMN04158710.APZ00_23900|121719.SAMN04158710.APZ00_23895:0.33711,((1207063.SAMN02471166.P24_14139|1207063.SAMN02471166.P24_14134:0.48451,(1287727.SAMN05443999.SAMN05443999_107154|1287727.SAMN05443999.SAMN05443999_107155:0.26336,(60137.SAMN04488041.SAMN04488041_109112|60137.SAMN04488041.SAMN04488041_109111:0.48173,1121479.SAMN02440615.GCA_000429365_04245|1121479.SAMN02440615.GCA_000429365_04244:0.31394)1.58:0.07554)75.98:0.21523)70.51:0.17033,(1126627.SAMD00000001.BDOA9_0204460|1126627.SAMD00000001.BDOA9_0204470:0.54594,(398.SAMN02787158.GCA_000799755_07441|398.SAMN02787158.GCA_000799755_07442:0.35294,1494590.SAMN04280999.ATN84_22305|1494590.SAMN04280999.ATN84_22310:0.34467)54.98:0.17674)0.28:0.03962)11.12:0.05600)2.58:0.03809)7.86:0.05380)86.11:0.09714)5.68:0.02613,(1736544.SAMN04155813.ASE66_18635|1736544.SAMN04155813.ASE66_18630:0.50158,(441620.SAMN00000038.Mpop_4077|441620.SAMN00000038.Mpop_4076:0.55157,(1223531.SAMD00046706.GCA_001591285_03016|1223531.SAMD00046706.GCA_001591285_03015:0.74558,((1736519.SAMN04155788.ASC62_17030|1736519.SAMN04155788.ASC62_17035:0.48314,((279238.SAMN02598432.Saro_2618|279238.SAMN02598432.Saro_2619:0.48187,1335760.SAMN02470046.GCA_000412635_00227|1335760.SAMN02470046.GCA_000412635_00228:0.22039)32.10:0.11171,(1736350.SAMN04151740.ASG11_08630|1736350.SAMN04151740.ASG11_08625:0.26474,1470591.SAMN02676630.BW41_02686|1470591.SAMN02676630.BW41_02687:0.23900)15.43:0.16199)101.72:0.18640)14.36:0.07237,1296990.SAMN03081456.H845_3026|1296990.SAMN03081456.H845_3027:0.47271)23.85:0.10215)3.55:0.04280)85.84:0.17561)51.28:0.14239)1.54:0.02686,(1238182.SAMN01840338.C882_1372|1238182.SAMN01840338.C882_1371:0.47283,(272627.SAMN03287305.CCC_01865|272627.SAMN03287305.CCC_01864:0.49235,(1544451.SAMN03024555.LF95_09605|1544451.SAMN03024555.LF95_09610:0.72053,(529.SAMN04495806.AYJ56_15950|529.SAMN04495806.AYJ56_15955:0.42307,381.SAMN05172963.A8145_27835|381.SAMN05172963.A8145_27840:0.26332)195.60:0.45755)10.34:0.09972)4.13:0.04943)12.26:0.06072)23.45:0.04526,(1449049.SAMN02744638.GCA_000712075_00077|1449049.SAMN02744638.GCA_000712075_00078:0.67635,(438753.SAMD00060925.AZC_0165|438753.SAMD00060925.AZC_0166:0.44517,(384.SAMN02787141.GCA_000799975_06090|384.SAMN02787141.GCA_000799975_06091:0.62842,1532558.SAMN02953215.JL39_22315|1532558.SAMN02953215.JL39_22310:0.80261)1.01:0.06464)21.00:0.29997)66.72:0.19613)8.86:0.02710)37.03:0.07074)1.59:0.04422)18.52:0.08948)22.14:0.10474)136.03:0.29339)28.79:0.10765)199.33:0.30625)18.80:0.00000;
