# Supplementary figures and images for: Ancestral reconstruction of duplicated signaling proteins reveals the evolution of signaling specificity
Source: eLife journal article supplement (doi:10.7554/elife.77346), 2022-06-10

Figure 1 - Figure Supplement 2

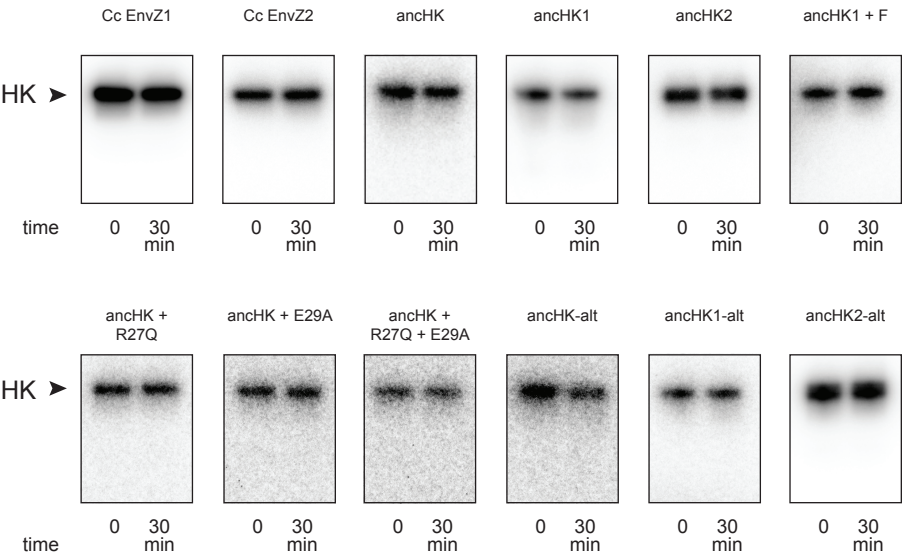

Supplement: supp [file elife-77346-supp-v1.zip]

Figure 1 - Figure Supplement 1

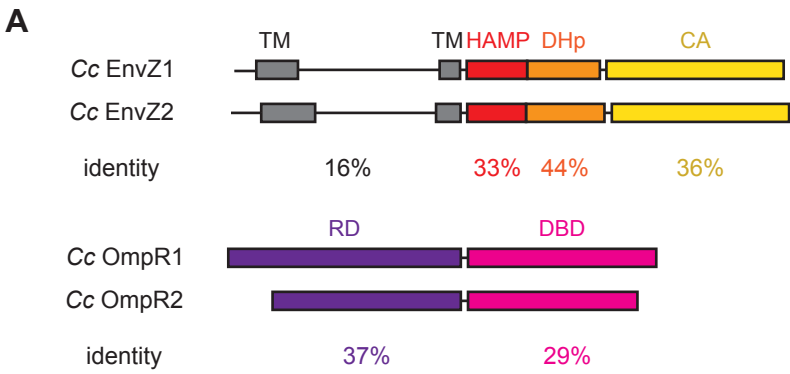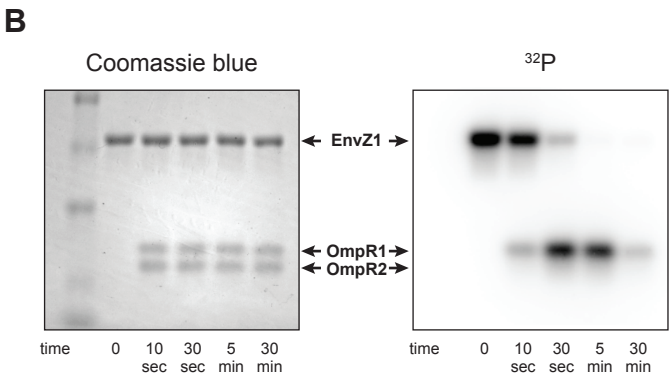

Supplement: supp [file elife-77346-supp-v1.zip]

**Figure 5 - Figure Supplement 1**

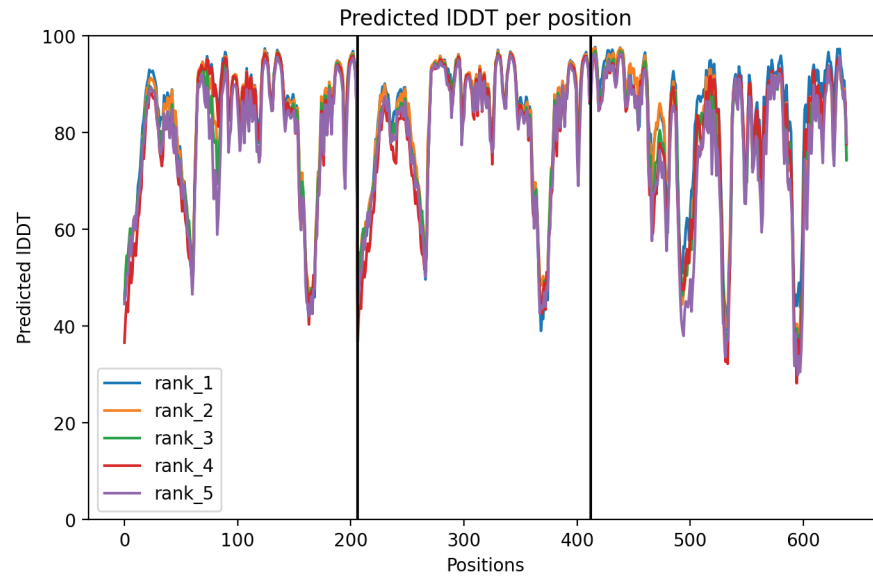

Supplement: supp [file elife-77346-supp-v1.zip]

Figure 3 - Figure Supplement 2

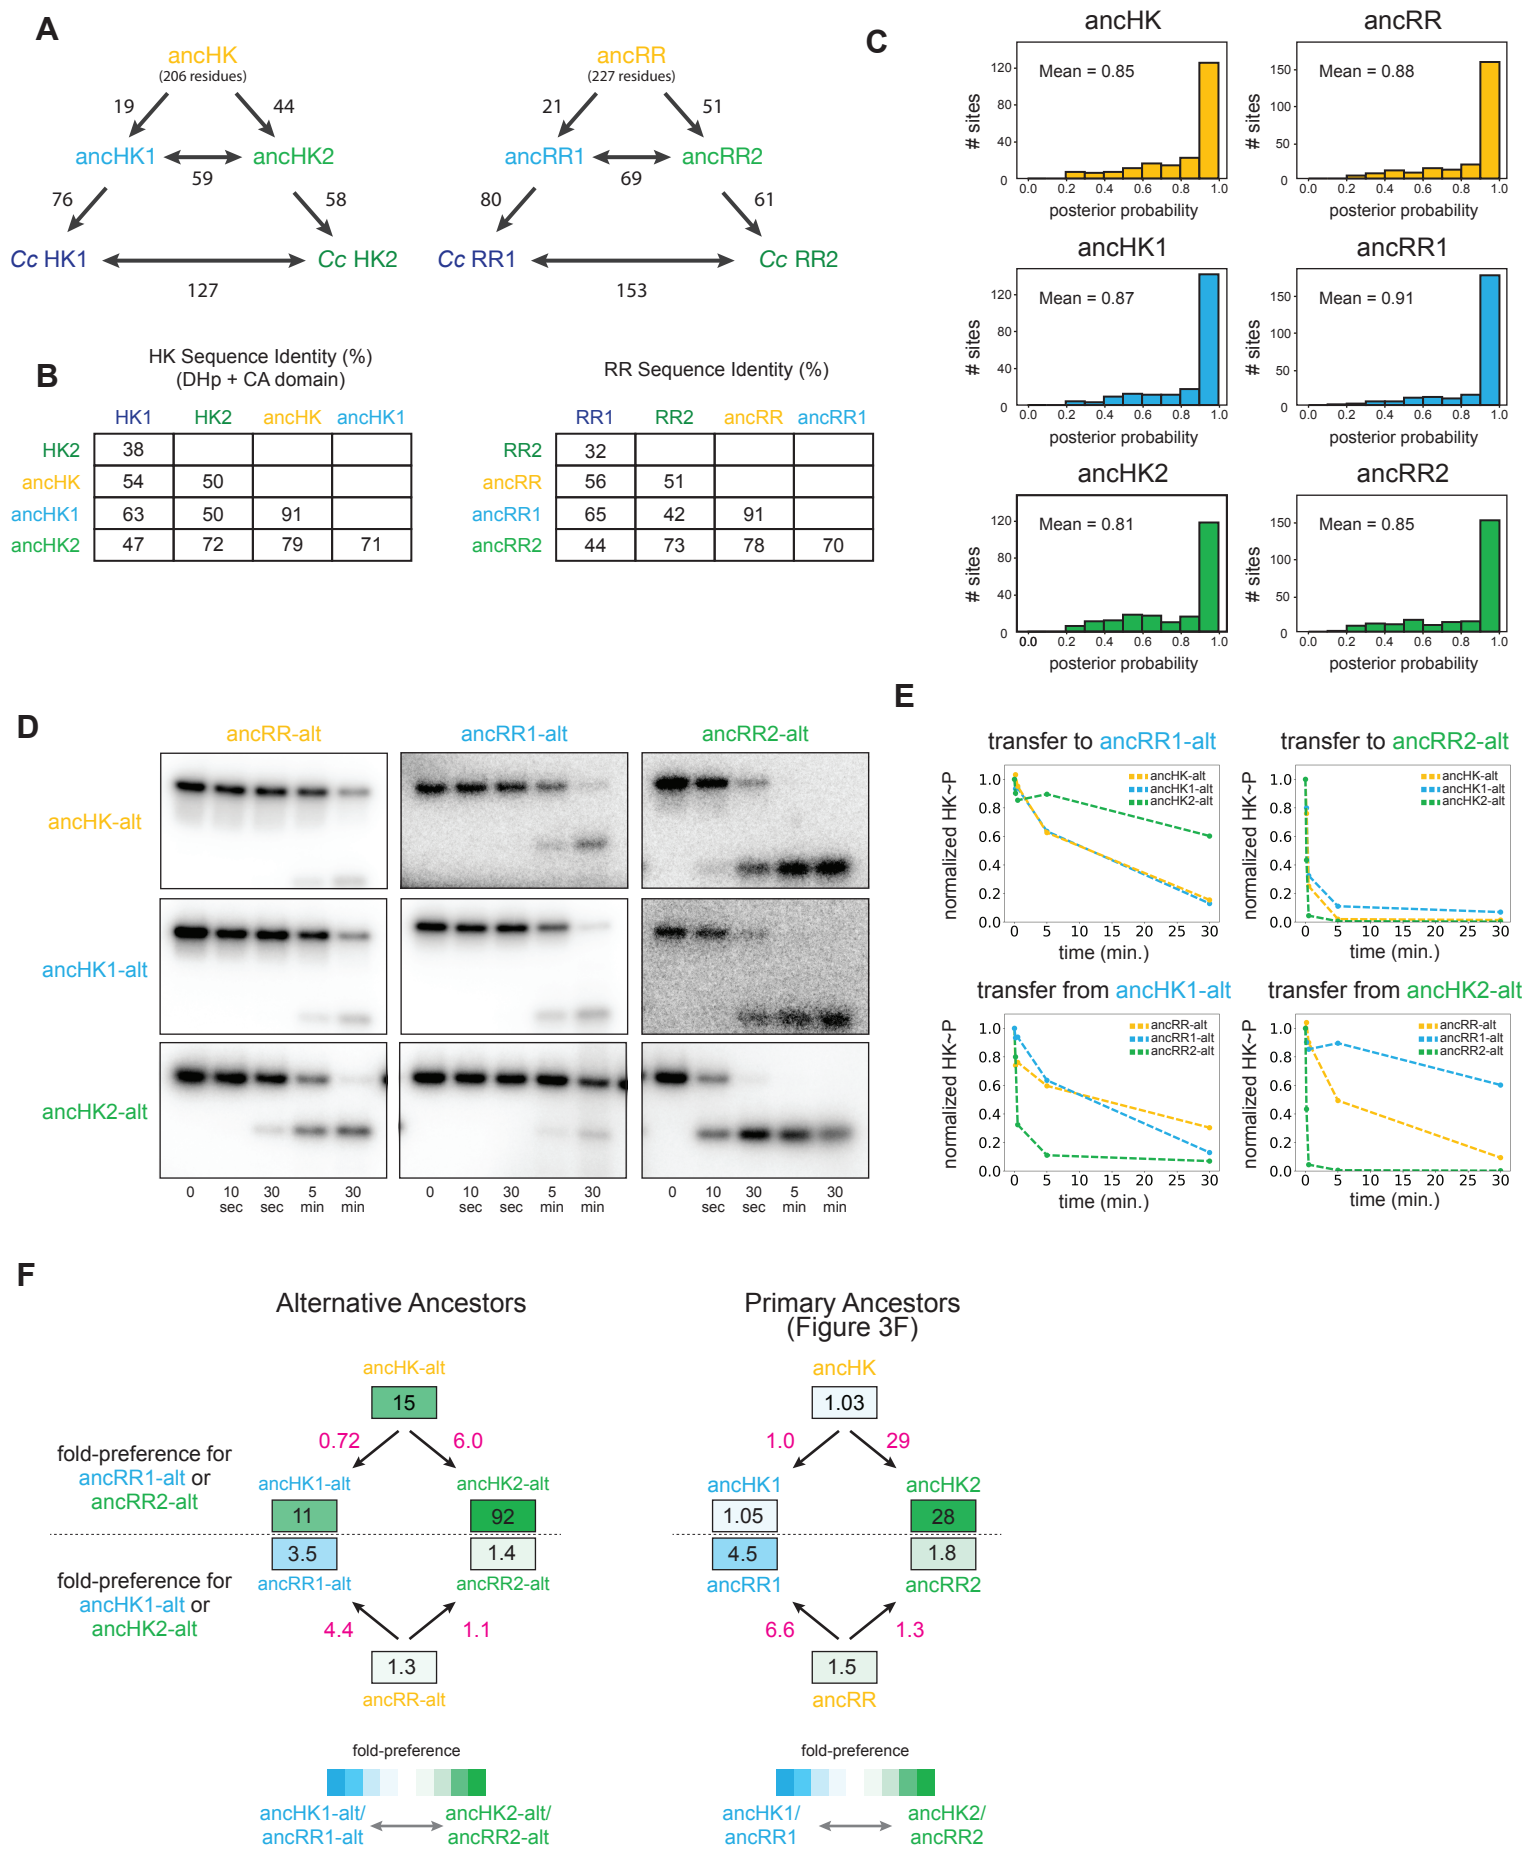

Supplement: supp [file elife-77346-supp-v1.zip]

Figure 2 - Figure Supplement 2

A

HK-only phylogeny

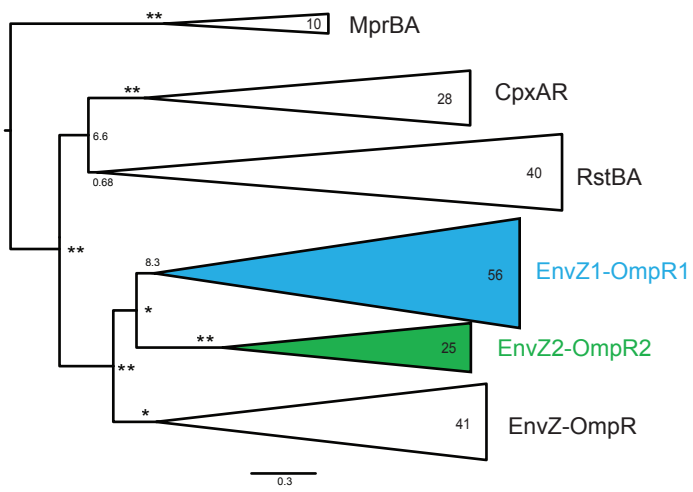

B

RR-only phylogeny

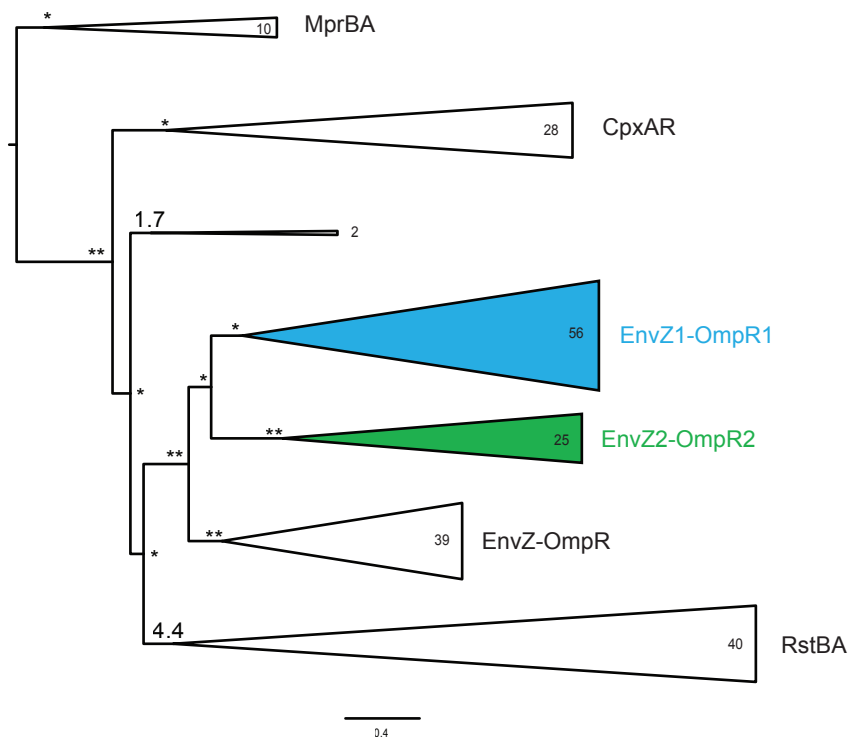

Supplement: supp [file elife-77346-supp-v1.zip]

### Figure 2 - Figure Supplement 1

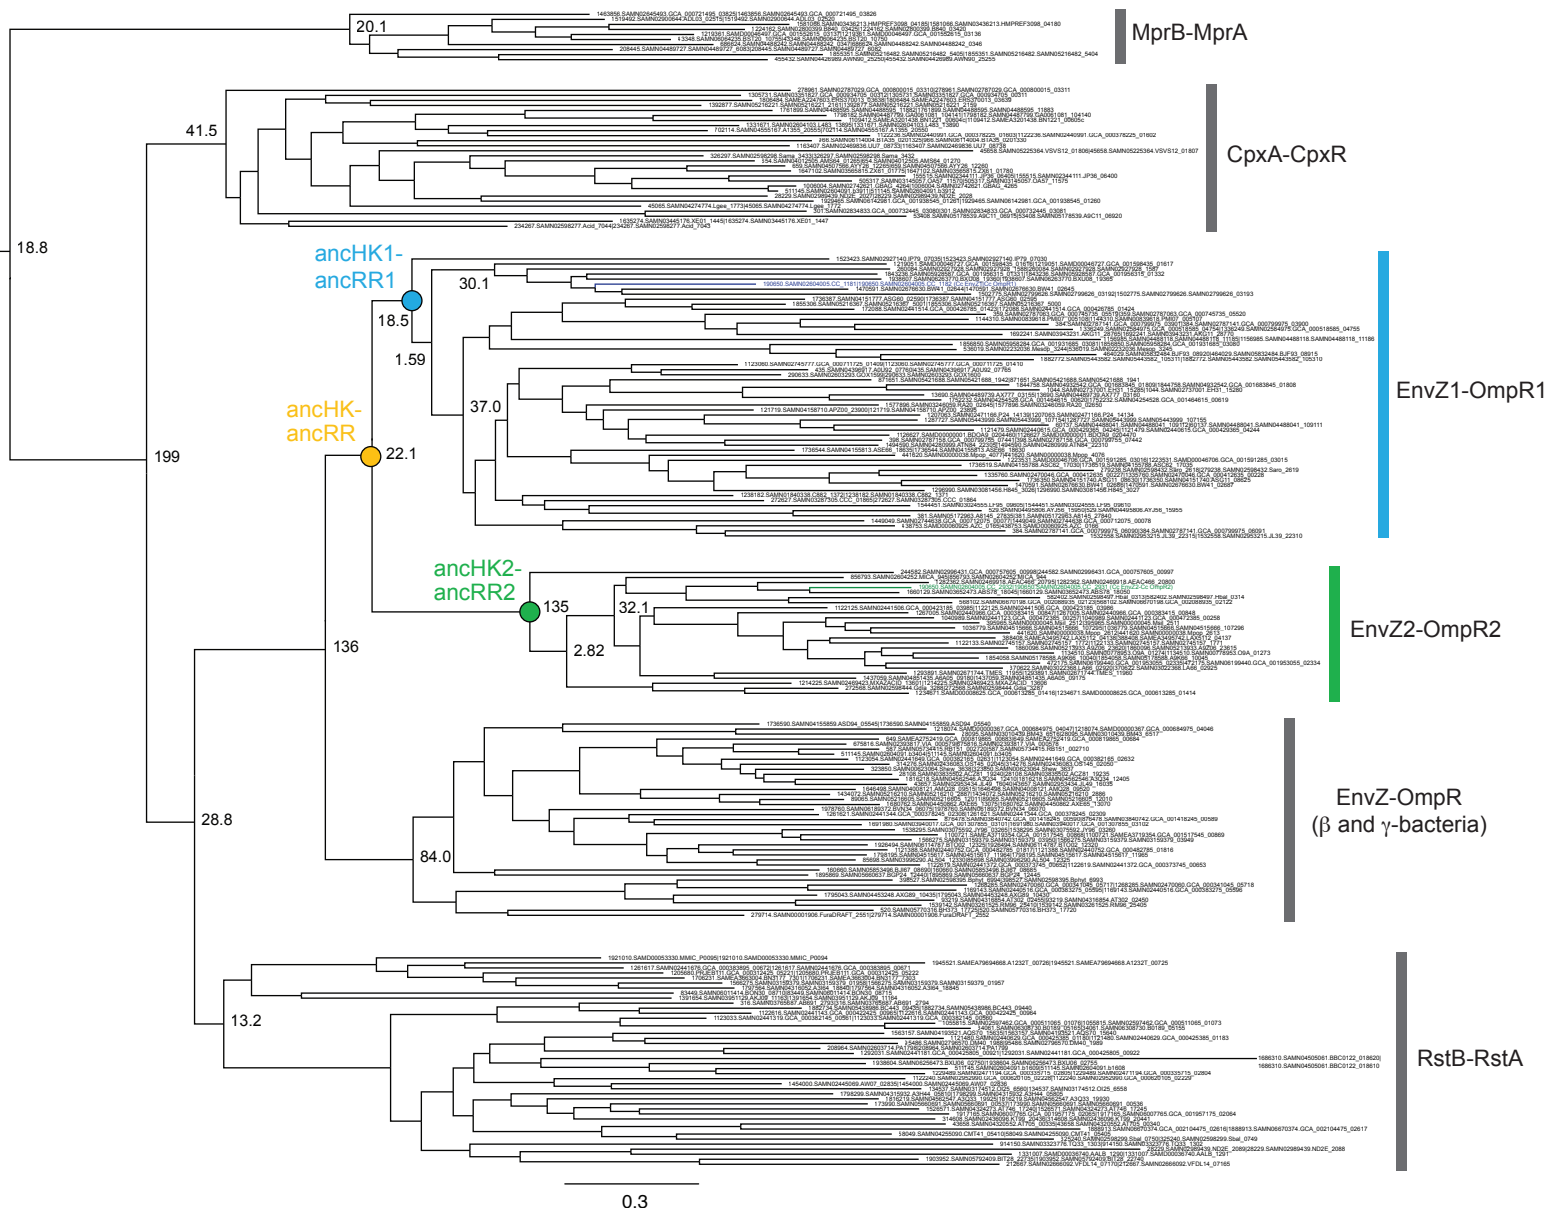

Supplement: supp [file elife-77346-supp-v1.zip › elife_poa_e77346_Figure_2_figure_supplement_1.pdf]

**A**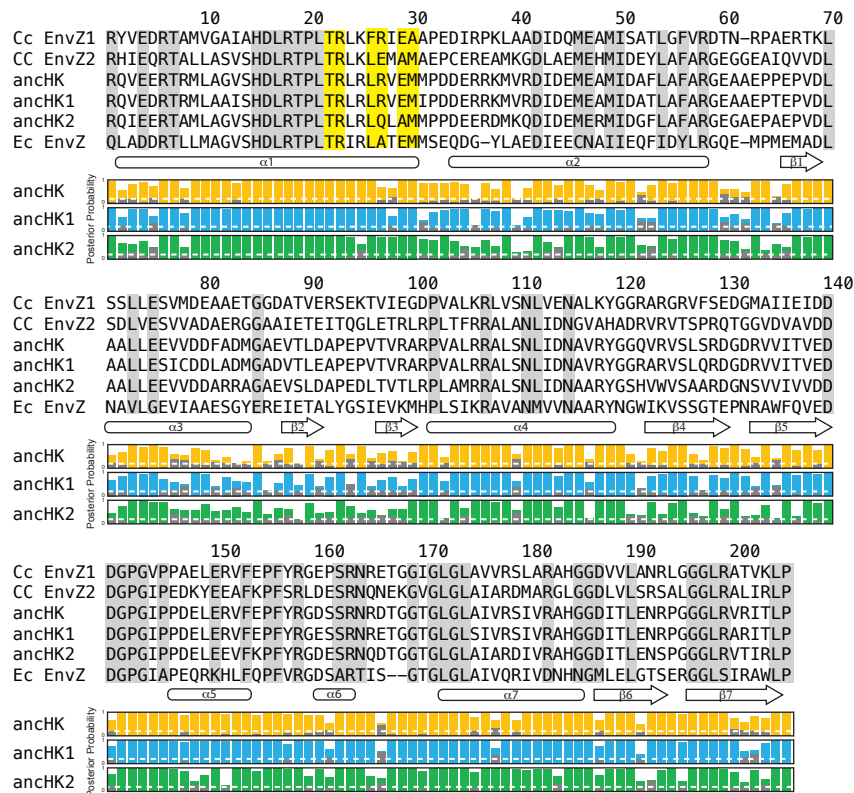**B**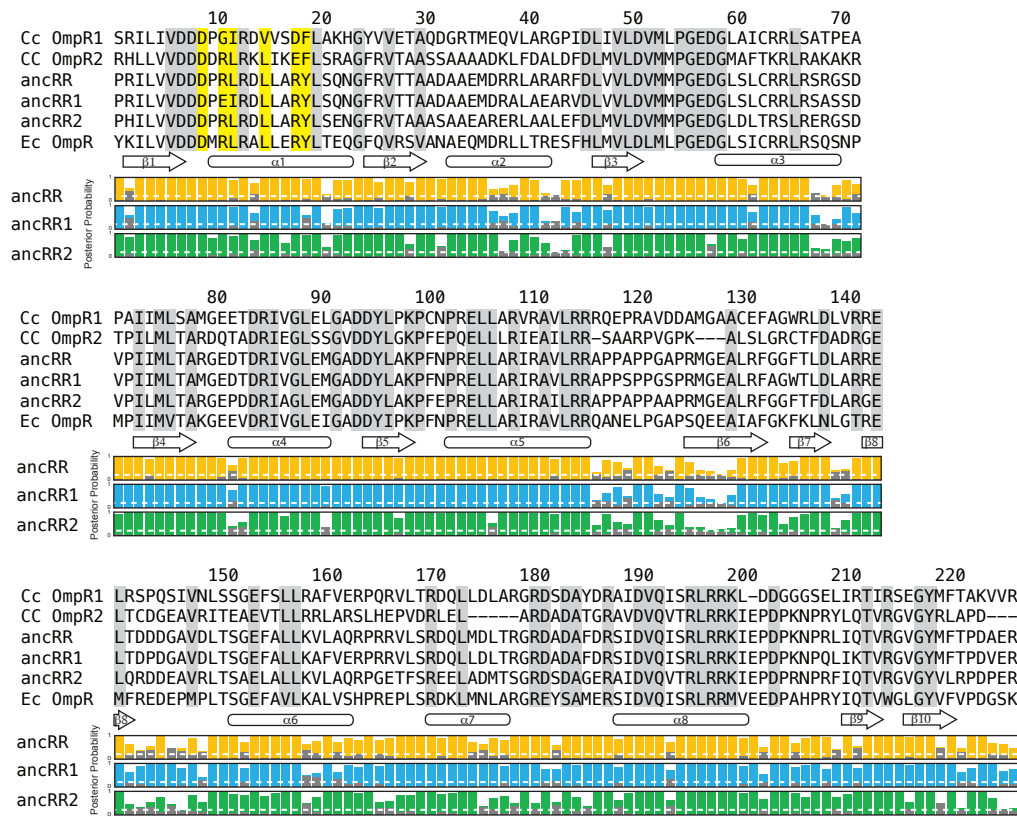

Supplement: supp [file elife-77346-supp-v1.zip › elife_poa_e77346_Figure_2_figure_supplement_3.pdf]

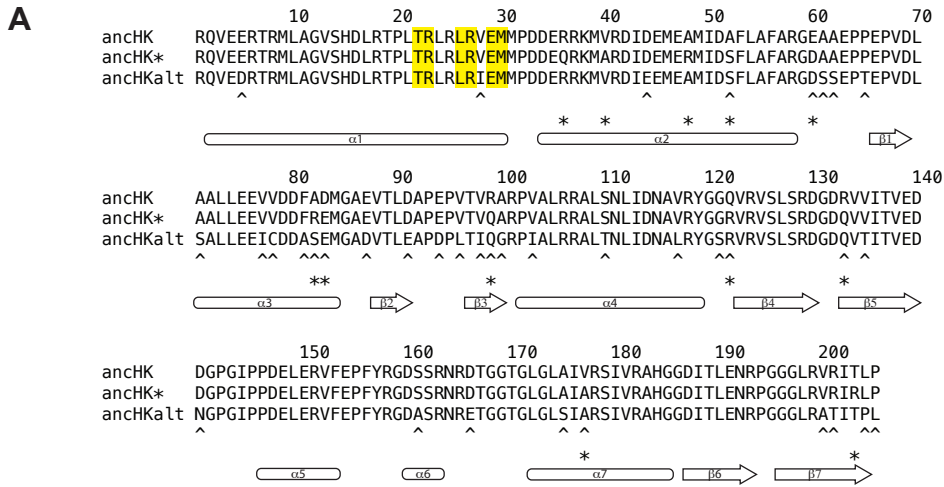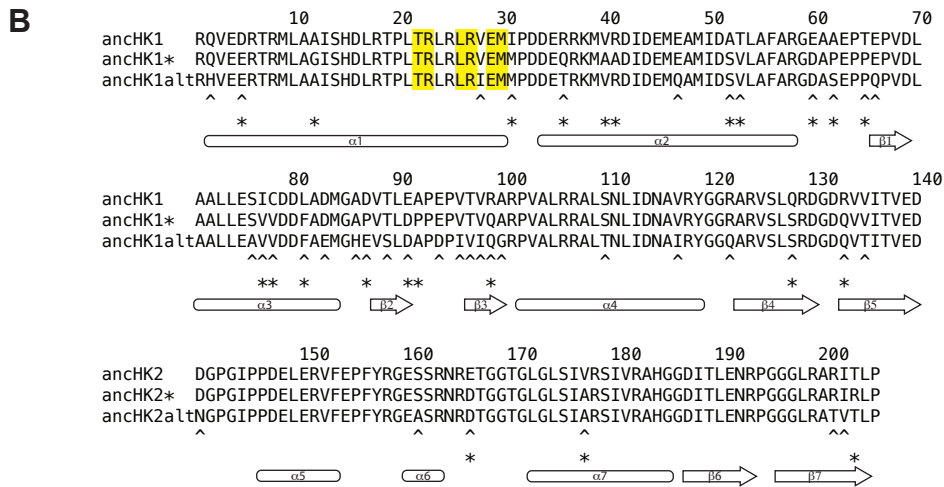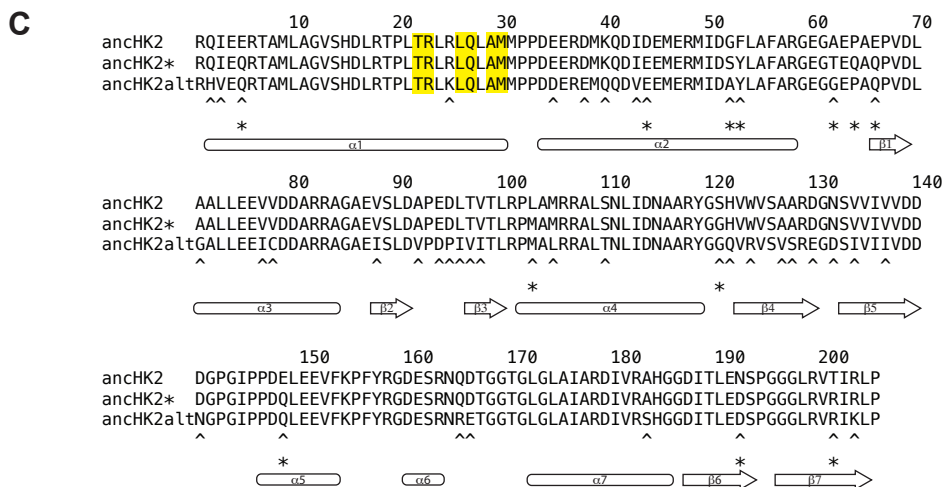

Supplement: supp [file elife-77346-supp-v1.zip › elife_poa_e77346_Figure_2_figure_supplement_4.pdf]

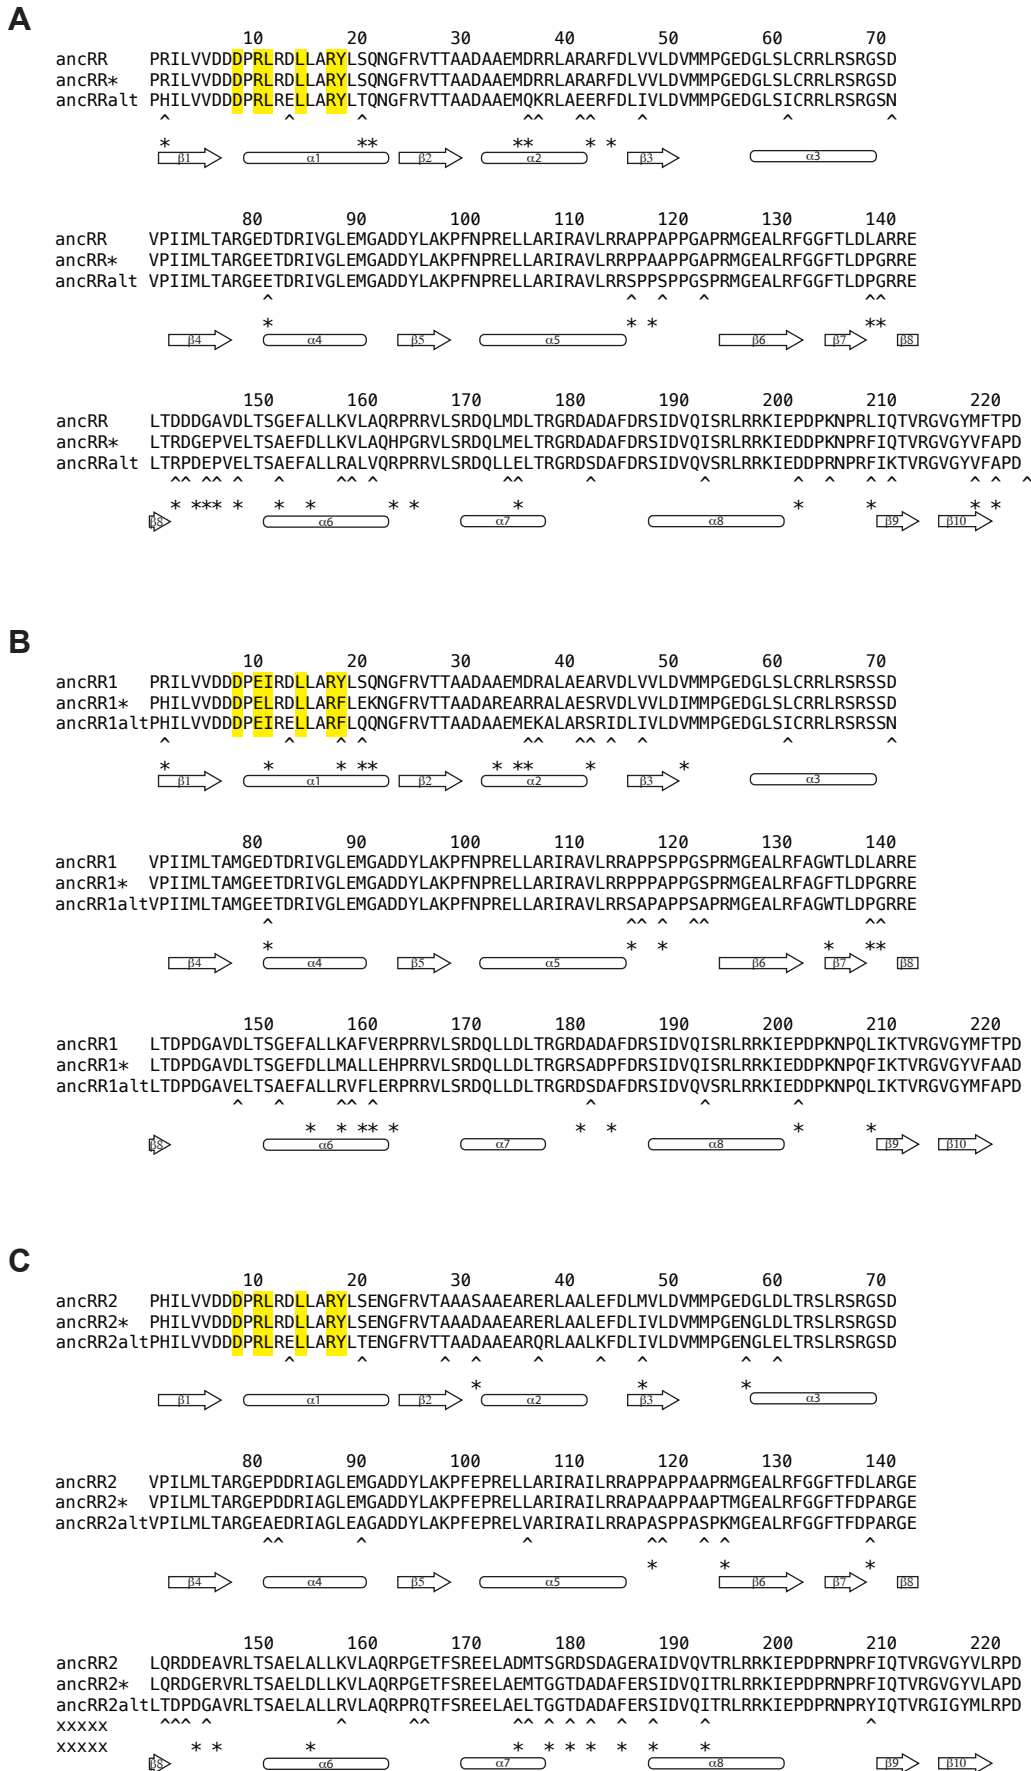

Supplement: supp [file elife-77346-supp-v1.zip › elife_poa_e77346_Figure_2_figure_supplement_5.pdf]

Figure 3 - Figure Supplement 1

A

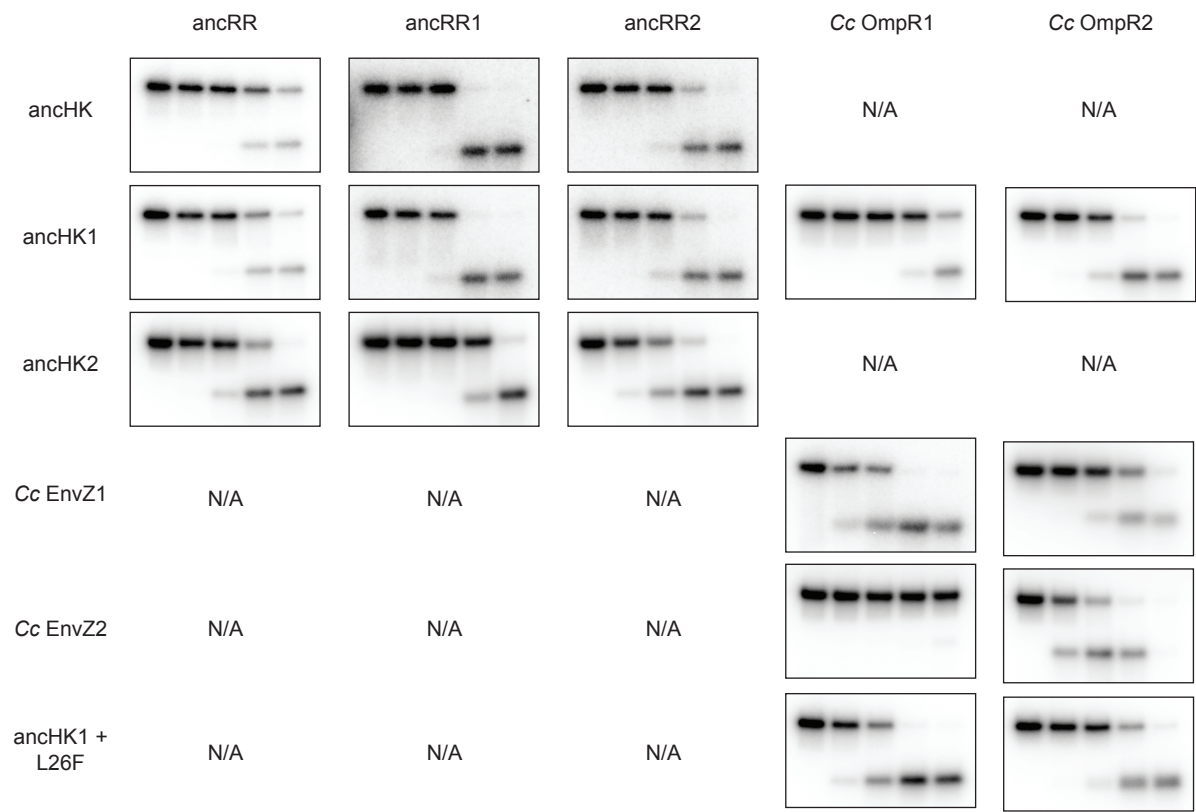

B

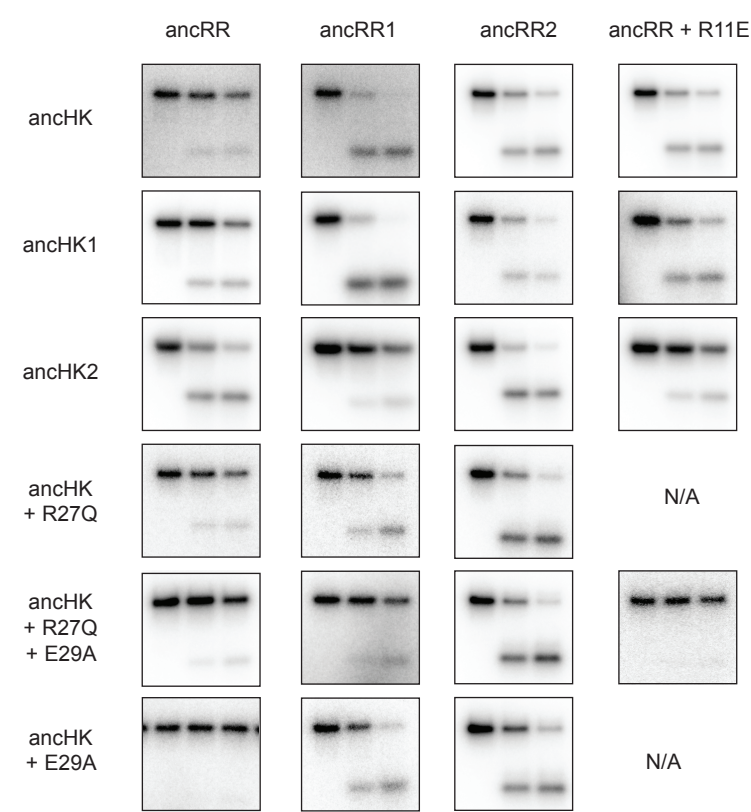

Supplement: supp [file elife-77346-supp-v1.zip › elife_poa_e77346_Figure_3_figure_supplement_1.pdf]

A

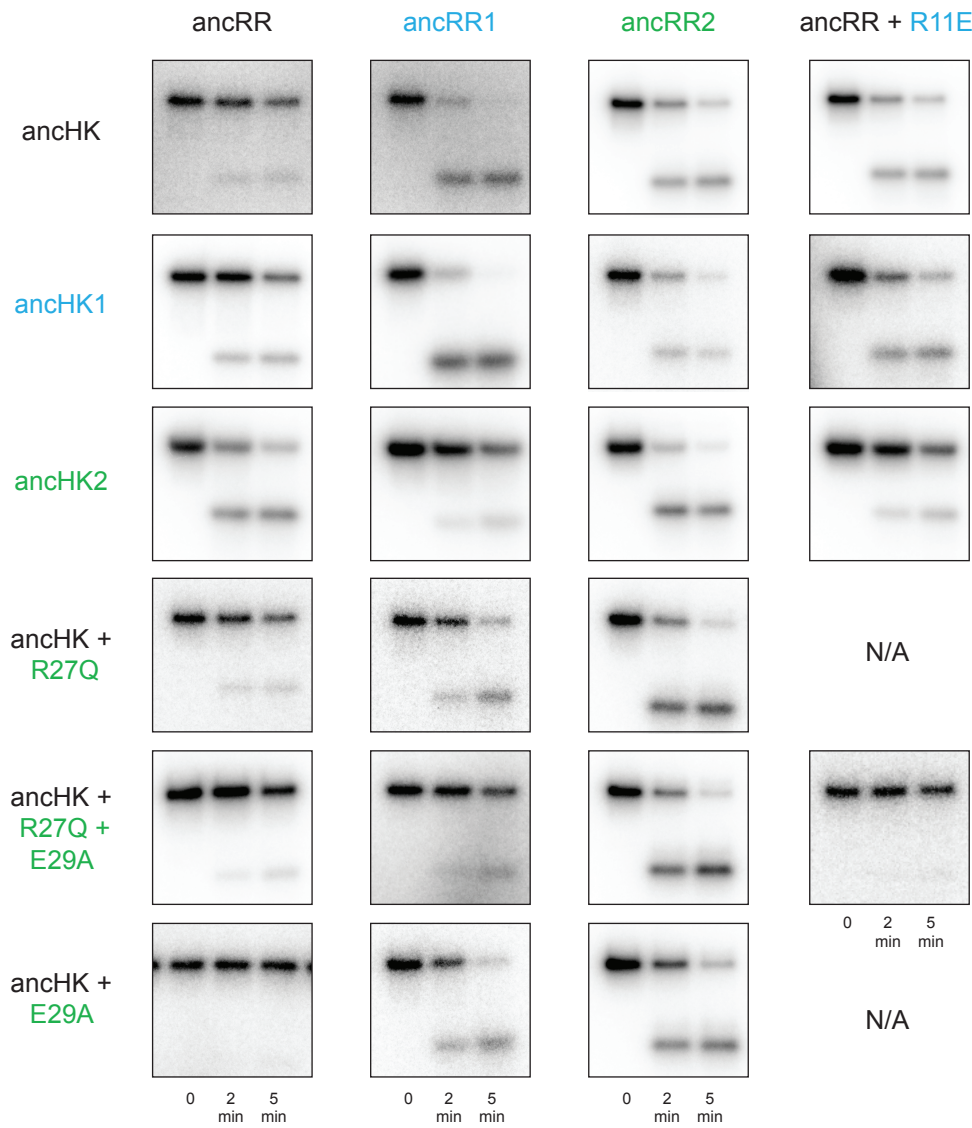

B

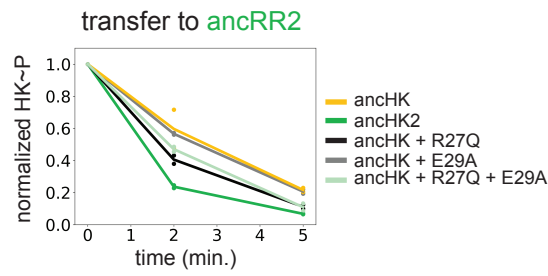

Supplement: supp [file elife-77346-supp-v1.zip › elife_poa_e77346_Figure_4_figure_supplement_1.pdf]
